# Supplementary material for: Bio-organic fertilizers improve Dendrocalamus farinosus growth by remolding the soil microbiome and metabolome
Source: Front Microbiol. 2023 Feb 15;14:1117355. doi: 10.3389/fmicb.2023.1117355 (PMC9975161; doi:10.3389/fmicb.2023.1117355)
Supplement: Supplementary file 1 [file Table_1.XLSX]

## Sheet: Table S2
Table S2. Detailed operational taxonomic unit count data
OTU_ID	Control.1	Control.2	Control.3	BmK.1	BmK.2	BmK.3	Ba.1	Ba.2	Ba.3	OF.1	OF.2	OF.3	OFBa.1	OFBa.2	OFBa.3	OFBmK.1	OFBmK.2	OFBmK.3
1	223	88	61	529	312	865	338	182	253	269	102	420	174	499	322	361	64	261
2	109	78	79	40	119	82	129	222	78	29	30	2	0	135	79	0	177	47
3	380	743	500	322	375	474	775	883	1149	695	663	1676	252	230	156	416	877	478
4	242	233	266	173	197	226	157	118	103	102	184	143	102	165	314	134	81	128
5	0	0	0	0	0	0	6	0	1	0	0	0	0	0	0	0	0	0
6	0	3	14	5	0	0	11	0	6	66	0	19	1	0	0	2	4	1
7	0	0	0	0	0	1	237	3	0	0	0	0	0	0	0	0	0	0
8	15	7	8	22	40	28	70	16	93	3	26	21	46	49	27	41	48	236
9	159	276	298	255	371	427	344	371	152	282	265	311	300	287	424	412	244	261
10	2708	2188	2942	1792	2210	1422	1216	2291	1889	3303	2257	3524	3373	2861	2770	2235	1876	2974
11	22	26	26	54	29	39	37	36	20	26	78	159	48	26	16	79	48	91
12	140	138	101	14	57	65	134	209	175	200	82	111	66	48	32	90	185	103
13	0	0	13	2	0	10	6	0	11	1	22	5	4	1	12	0	0	0
14	698	420	568	276	594	441	484	486	672	595	427	819	797	621	519	628	751	464
15	18	0	0	0	0	0	40	1	0	0	0	0	0	0	0	0	0	0
16	153	140	99	42	62	69	132	143	135	118	227	127	31	13	51	137	183	19
17	56	73	64	14	78	17	32	52	67	10	23	84	19	7	19	48	112	38
18	100	58	20	35	131	51	53	86	69	58	166	52	84	83	126	260	65	55
19	0	0	0	0	0	0	116	0	0	0	0	0	1	0	36	0	0	0
20	51	43	15	3	1	14	12	17	7	3	0	18	0	0	0	3	17	4
21	62	0	0	38	30	0	103	71	18	0	21	44	0	60	0	173	18	0
22	1	1	5	4	4	0	11	18	30	6	11	24	0	36	2	4	57	3
23	5	29	93	5	5	10	26	1	1	1	6	2	0	0	9	11	3	7
24	32	39	3	15	2	0	53	1	0	0	0	0	1	0	5	0	0	0
25	238	167	153	197	263	181	130	96	129	105	298	326	324	563	356	155	204	65
26	0	0	0	0	0	0	40	0	0	0	0	0	0	0	0	0	0	0
27	274	100	151	87	165	85	68	82	98	138	93	145	61	103	114	85	112	44
28	662	554	803	704	764	157	160	287	314	232	136	182	123	70	362	50	293	49
29	9	10	2	3	2	0	20	5	8	0	0	0	0	0	0	0	0	0
30	1299	1148	1162	1536	2858	1656	1035	918	976	1589	1754	2595	4311	2149	2010	2369	2660	1209
31	42	77	79	123	211	124	51	110	43	76	124	297	152	115	253	242	162	54
32	220	638	500	265	371	290	624	723	477	437	315	318	51	54	157	532	286	105
33	58	85	87	89	166	56	264	234	150	210	261	283	342	382	504	229	294	153
34	266	479	216	193	326	228	386	320	249	340	205	353	298	170	372	190	281	128
35	64	97	122	51	95	70	60	33	57	79	120	58	121	126	153	80	83	59
36	0	0	1	50	0	0	19	45	1	55	2	61	0	1	65	0	1	23
37	207	147	154	144	240	215	101	31	90	130	188	197	80	116	264	102	179	67
38	0	53	2	14	1	17	50	1	0	34	1	0	99	0	149	0	0	0
39	441	564	762	88	306	199	114	363	278	232	92	144	113	132	64	91	243	175
40	55	0	42	78	135	33	97	11	55	41	36	44	65	158	6	48	72	16
41	125	239	39	90	126	118	143	274	230	179	35	119	70	70	85	113	194	27
42	45	0	40	15	7	68	167	36	0	94	14	0	69	86	0	184	53	0
43	284	257	165	151	121	192	488	266	297	760	189	276	300	476	146	263	238	142
44	27	46	67	60	16	9	35	160	36	41	70	9	116	150	66	38	21	182
45	232	101	158	144	131	30	334	265	290	403	77	63	367	392	396	151	211	88
46	26	55	31	32	30	38	69	85	52	32	38	51	19	18	29	90	116	53
47	68	83	149	69	45	173	39	38	35	81	145	149	145	189	271	189	150	91
48	361	307	346	81	282	157	98	328	260	149	92	127	165	80	57	442	267	31
49	82	100	57	139	394	267	172	118	234	74	153	94	75	80	143	110	60	21
50	58	247	127	123	156	116	180	191	117	116	114	251	66	11	60	125	197	59
51	0	6	2	0	0	2	35	0	8	0	1	0	0	0	0	0	1	0
52	61	13	59	20	62	42	31	60	45	35	33	113	52	50	139	54	61	16
53	28	45	30	12	41	38	14	18	56	57	92	46	32	48	111	55	21	10
54	124	156	83	47	0	2	209	26	209	272	183	0	0	327	48	211	56	138
55	49	80	90	28	52	39	91	82	110	18	28	67	16	11	10	77	48	22
56	314	306	338	334	364	319	259	269	286	218	274	292	265	380	439	365	218	278
57	10	73	10	25	81	36	48	75	57	41	67	46	58	47	97	104	73	62
58	345	392	408	412	816	593	790	573	557	910	802	1116	700	871	1566	612	714	464
59	0	1	0	0	0	0	20	0	0	0	0	0	1	0	0	0	0	0
60	102	111	55	63	240	100	138	138	82	137	147	162	85	56	210	50	147	26
61	35	79	31	62	147	73	1563	143	120	40	2319	62	167	2516	120	175	31	110
62	33	36	45	51	99	57	343	119	84	154	508	427	220	362	333	326	420	140
63	93	248	141	55	196	161	319	135	153	80	183	73	1	4	6	56	59	182
64	0	0	0	0	0	0	44	0	0	0	0	0	0	0	0	0	0	0
65	234	574	573	554	569	347	591	518	992	317	366	701	220	306	165	476	436	1473
66	303	287	335	413	465	202	156	146	290	161	113	191	205	301	371	213	110	139
67	28	57	38	44	36	25	35	81	42	48	36	57	60	9	46	25	91	25
68	59	36	8	51	86	8	89	79	92	20	68	46	15	31	28	212	48	19
69	1	0	0	0	0	0	7	0	0	0	0	0	0	0	0	0	0	0
70	3	18	29	0	1	8	17	18	18	0	2	14	1	4	2	0	1	0
71	141	129	75	105	80	59	203	358	322	169	140	180	136	67	139	163	304	148
72	139	18	50	169	101	280	363	98	2	70	101	39	210	194	76	295	108	652
73	4	2	4	26	53	23	99	41	14	19	21	76	12	10	90	102	20	17
74	44	133	40	47	102	51	130	186	109	106	61	123	9	6	14	97	160	41
75	27	68	49	4	67	33	64	49	101	20	13	11	36	19	18	16	12	134
76	23	17	15	17	7	4	49	28	39	11	13	22	7	2	13	14	12	5
77	5	15	18	8	15	23	20	64	11	8	32	24	3	6	26	5	0	23
78	27	65	13	36	31	46	104	94	56	121	82	93	101	37	36	112	74	62
79	523	437	344	301	386	287	344	375	326	583	302	546	513	312	332	602	735	322
80	81	73	38	56	43	48	83	152	175	234	83	139	74	73	55	115	177	48
81	27	8	14	3	13	20	30	29	17	6	28	102	42	35	91	50	32	57
82	0	0	0	0	0	1	68	0	0	0	0	0	0	0	0	0	0	0
83	498	509	384	282	470	550	362	394	375	439	354	468	168	243	156	345	1182	416
84	0	17	47	9	11	15	22	42	56	32	16	71	14	0	9	29	52	29
85	3	30	9	15	19	3	39	21	11	7	19	12	3	4	1	7	35	11
86	21	122	98	17	49	65	108	98	49	52	215	18	4	11	1	107	11	61
87	8	12	6	2	15	20	69	31	13	17	8	39	5	0	30	43	133	2
88	72	0	0	41	41	37	97	0	1	0	17	0	63	227	0	0	0	41
89	10	140	41	69	31	26	100	36	117	7	10	30	0	0	4	52	66	81
90	0	0	0	0	1	0	12	17	1	0	0	0	1	0	0	0	3	2
91	0	3	0	3	0	5	11	21	6	6	15	17	13	0	1	1	1	0
92	16	0	3	0	1	0	8	0	0	5	3	0	0	0	0	2	0	0
93	70	53	38	31	117	62	55	25	53	11	29	33	24	5	62	23	1	6
94	48	61	9	9	22	29	10	19	15	0	3	15	0	0	4	2	11	8
95	286	185	290	87	163	116	159	171	246	363	147	259	92	107	133	128	258	127
96	66	88	180	111	58	57	168	108	67	103	54	87	1	10	3	109	87	37
97	33	3	0	0	1	0	13	10	8	11	3	6	0	13	10	21	0	2
98	53	50	18	17	31	14	42	40	31	172	23	116	43	59	35	108	109	40
99	2	60	33	2	33	4	31	60	49	15	23	24	16	33	8	48	19	150
100	0	0	0	0	19	0	10	7	3	7	8	2	21	14	25	0	0	4
101	58	18	35	14	15	20	35	22	18	49	9	22	9	74	40	21	11	27
102	95	483	308	116	139	88	298	282	474	217	105	184	105	39	56	170	392	298
103	184	147	240	184	327	173	142	82	116	108	180	356	171	100	236	141	29	70
104	122	57	78	7	19	33	6	34	2	2	14	22	94	37	43	14	10	6
105	134	137	99	73	88	54	108	107	83	72	66	78	90	51	66	122	110	55
106	91	48	80	25	144	88	75	53	34	135	59	95	180	93	117	107	100	46
107	51	21	38	27	14	42	77	48	55	116	29	67	28	0	21	52	141	5
108	0	3	0	0	3	0	44	0	0	0	0	0	0	3	0	0	30	41
109	35	60	60	74	122	95	278	178	114	326	145	228	74	110	164	102	142	203
110	14	22	49	8	1	16	114	75	50	37	44	32	0	1	0	29	6	0
111	77	64	44	216	0	214	253	199	229	311	201	57	31	256	0	112	47	15
112	127	138	110	162	230	185	165	202	148	265	223	357	322	489	650	216	294	158
113	135	233	202	171	267	246	102	174	114	74	127	178	195	216	240	216	134	84
114	90	132	152	118	187	100	88	236	210	143	132	213	447	521	213	235	129	107
115	0	0	0	0	0	0	71	0	0	0	0	0	0	0	0	0	0	0
116	46	73	93	94	74	82	60	155	89	126	78	115	56	28	118	145	293	27
117	38	8	33	4	24	9	60	17	8	10	1	11	1	3	0	2	1	4
118	0	0	7	57	27	120	52	0	21	91	0	0	75	70	0	67	0	29
119	0	0	1	0	0	131	12	0	0	0	0	0	0	0	0	0	0	0
120	0	5	2	0	0	0	12	6	1	0	0	1	0	0	0	2	2	2
121	31	0	32	24	0	73	150	5	0	0	0	26	0	0	0	0	0	0
122	0	17	10	14	15	4	28	6	2	0	2	3	0	0	0	3	24	1
123	14	45	41	13	117	98	99	156	34	47	171	116	47	333	149	173	253	19
124	0	0	0	0	0	0	7	2	0	0	0	0	0	0	0	0	0	0
125	0	6	0	0	2	2	28	0	3	0	0	3	0	0	0	2	0	5
126	25	11	15	11	24	20	53	27	7	12	58	58	61	72	42	38	20	10
127	99	131	217	10051	261	322	381	159	233	242	5585	166	327	645	353	320	409	368
128	0	3	0	0	17	3	136	0	2	0	0	1	0	1	0	0	0	71
129	141	159	162	244	245	307	465	518	521	662	298	438	195	145	451	654	461	243
130	42	112	116	42	88	42	146	172	111	75	54	107	22	0	23	112	69	49
131	47	32	52	24	73	43	139	78	42	111	121	128	194	141	360	54	148	31
132	68	107	141	70	61	43	140	194	188	130	64	162	13	52	76	151	107	31
133	13	40	1	8	11	27	28	10	149	6	4	6	1	2	0	16	20	8
134	198	195	194	278	433	496	235	323	280	245	193	306	203	211	342	397	242	202
135	106	108	88	58	49	42	43	28	21	39	24	16	41	3	20	46	7	1
136	8	78	47	19	69	31	65	37	42	20	17	49	5	36	19	18	13	13
137	16	70	60	65	51	71	74	51	79	107	62	76	167	79	231	52	78	41
138	44	109	100	66	185	210	260	98	114	108	227	367	342	123	215	99	340	87
139	0	0	0	53	0	102	156	0	0	0	0	0	1	0	0	0	0	23
140	35	26	83	9	53	28	74	42	10	47	6	6	3	3	17	2	37	23
141	195	312	192	211	276	211	273	281	259	760	446	537	649	526	786	404	360	349
142	0	2	0	0	0	2	14	0	0	0	0	12	0	0	0	0	1	0
143	1	0	0	26	18	4	9	0	11	0	2	6	5	2	0	0	5	4
144	125	155	200	120	128	134	203	251	241	159	169	128	130	84	74	104	125	474
145	0	22	53	12	18	166	57	0	15	65	0	70	25	0	43	0	28	1
146	74	65	86	54	57	33	46	212	48	95	43	42	102	94	82	33	74	13
147	16	34	13	6	22	10	42	28	102	22	32	6	2	6	38	16	5	5
148	0	2	29	27	45	24	109	29	12	16	4	3	1	0	5	8	45	12
149	0	0	0	9	0	13	24	10	0	0	0	0	0	1	0	21	0	0
150	46	65	86	40	57	29	54	90	112	139	32	105	43	37	60	39	108	23
151	71	85	0	34	110	80	173	97	100	551	69	139	63	36	83	220	69	17
152	21	3	7	8	7	0	6	13	0	0	4	1	2	0	1	0	0	0
153	0	0	0	0	22	318	38	0	0	0	0	0	0	0	0	94	0	0
154	0	0	0	0	0	0	5	0	0	0	0	0	0	0	0	0	0	0
155	72	64	81	16	73	63	44	44	65	12	24	43	78	23	23	104	12	9
156	0	0	0	0	0	63	24	0	23	0	2	0	0	0	0	0	0	0
157	48	10	22	34	9	8	13	15	33	19	230	11	9	174	26	14	16	84
158	126	482	262	154	192	227	202	166	173	64	115	152	359	194	604	290	88	55
159	50	325	209	118	141	176	329	252	214	230	53	196	68	2	22	140	110	44
160	17	39	46	50	88	67	183	183	81	41	83	54	142	136	159	139	47	37
161	52	39	61	71	60	51	150	155	105	43	110	87	59	130	72	84	128	90
162	28	29	46	14	35	24	24	49	61	35	26	74	3	10	5	24	33	18
163	0	24	0	0	1	0	69	0	0	0	63	44	0	0	0	59	0	0
164	0	0	0	0	0	0	44	0	0	0	0	1	0	0	0	0	0	0
165	37	64	97	44	74	55	95	89	56	116	48	75	21	20	17	6	29	121
166	0	7	3	25	19	5	17	3	9	1	11	18	3	66	16	74	13	11
167	143	130	126	83	44	57	51	124	69	42	46	59	64	22	51	69	181	73
168	0	0	0	0	0	0	2	0	5	0	0	2	0	0	0	0	0	0
169	0	0	21	0	0	0	86	0	0	76	0	0	0	0	0	0	0	0
170	0	1	0	0	1	0	101	0	0	27	0	0	0	62	0	38	59	0
171	0	0	5	0	0	5	6	0	0	0	0	0	0	0	2	0	1	0
172	17	11	50	16	30	36	31	28	25	27	54	16	5	7	16	43	49	33
173	0	0	5	2	2	3	14	1	0	0	0	12	1	0	0	0	0	0
174	0	0	0	0	0	1	13	0	0	1	0	0	0	0	0	0	2	0
175	23	96	89	59	144	33	129	178	48	0	92	150	63	425	79	322	77	52
176	18	15	5	2	2	1	72	9	36	1	39	2	0	0	3	13	31	17
177	183	124	111	80	69	70	41	45	39	17	47	28	39	25	53	97	111	52
178	56	61	44	21	19	20	21	51	27	51	20	46	17	14	10	34	14	19
179	76	121	108	25	42	73	79	122	112	39	60	122	30	74	39	37	135	60
180	10	2	7	5	6	8	25	56	7	9	21	20	34	40	88	27	6	55
181	114	147	126	49	29	62	40	84	100	116	12	117	40	12	42	32	66	75
182	435	57	147	23	205	50	81	59	51	24	22	18	10	35	53	45	6	11
183	80	78	94	41	47	39	47	62	36	135	128	58	6	3	25	79	17	25
184	23	38	28	10	15	28	28	32	37	44	14	20	0	0	0	26	1	1
185	31	94	25	39	20	3	179	58	65	98	68	19	21	2	21	2	38	21
186	16	33	21	9	14	6	67	4	25	49	13	8	11	0	8	60	114	6
187	0	6	0	0	4	0	3	0	2	0	0	0	0	0	0	0	0	0
188	0	2	0	1	0	0	3	0	0	0	6	4	7	2	0	0	1	3
189	51	44	59	6	23	4	80	56	15	55	4	12	2	0	0	53	14	4
190	0	0	0	0	0	0	11	0	0	0	0	0	0	0	0	0	0	0
191	8	10	11	41	23	9	21	27	19	31	38	31	49	22	49	39	45	15
192	2	5	2	0	1	0	3	4	6	6	0	0	1	0	0	0	0	0
193	0	26	26	12	21	41	38	35	11	37	55	19	23	1	1	37	56	5
194	111	61	48	32	82	75	131	93	60	15	86	23	15	22	11	24	3	18
195	41	29	69	19	26	29	38	61	26	135	25	50	30	39	64	81	5	26
196	38	11	9	26	8	2	20	23	20	80	16	44	37	12	6	9	7	6
197	356	393	376	297	1053	438	279	175	344	218	434	257	400	308	758	190	227	128
198	7	3	9	25	17	14	46	32	10	18	12	15	3	2	12	1	5	36
199	0	0	1	0	0	19	66	0	0	1	0	0	6	0	0	0	0	0
200	63	13	60	28	23	53	48	35	30	10	53	30	20	16	31	15	56	22
201	25	25	42	0	18	9	22	7	12	0	8	1	0	0	0	0	2	42
202	102	204	147	216	465	430	285	265	244	53	134	339	401	318	405	616	219	67
203	0	0	0	0	0	0	4	0	0	0	0	0	0	0	0	0	0	0
204	381	197	298	189	300	138	225	243	217	127	185	159	186	74	136	199	198	120
205	16	24	2	0	5	12	18	26	46	3	22	2	0	0	1	1	0	0
206	73	91	62	3	16	10	13	21	12	0	1	0	2	0	0	5	0	0
207	307	270	246	105	162	160	236	258	199	170	137	96	79	168	151	197	126	21
208	37	24	0	0	0	0	35	0	0	0	0	0	91	0	0	0	0	37
209	178	164	98	196	317	148	123	103	268	160	176	110	120	176	349	53	84	36
210	34	24	67	37	47	26	40	33	19	28	12	42	32	39	84	55	20	25
211	0	0	0	0	0	0	15	0	0	0	4	1	0	0	0	0	0	14
212	2	28	13	10	1	2	19	11	9	4	6	0	0	0	0	0	0	1
213	0	3	9	0	6	56	9	10	8	3	12	2	1	0	17	0	24	1
214	55	106	171	40	159	128	53	38	40	24	49	38	89	197	181	69	57	17
215	310	353	412	192	273	150	221	321	358	236	123	154	144	108	75	187	376	64
216	0	25	37	45	98	0	76	66	0	0	0	46	60	0	0	0	0	0
217	0	0	0	0	0	1	36	0	0	0	0	0	0	0	0	0	0	0
218	3	12	36	8	9	30	65	15	17	8	7	37	0	0	8	2	61	0
219	0	2	1	0	8	0	34	0	13	0	1	1	0	11	0	5	6	1
220	0	0	0	0	0	0	8	0	0	0	0	0	0	0	0	0	0	0
221	8	2	2	12	15	0	26	29	10	1	20	4	3	1	1	1	0	3
222	6	11	16	14	26	7	44	18	48	10	10	3	13	0	5	1	17	11
223	0	0	0	2	1	0	8	0	8	1	12	29	0	0	2	2	2	11
224	354	213	287	189	241	147	129	151	199	98	176	135	247	153	192	68	25	44
225	0	2	0	0	4	2	27	0	5	0	0	2	0	0	0	6	0	0
226	0	61	22	134	93	15	67	187	130	170	57	89	86	267	155	140	69	103
227	17	214	265	53	157	113	114	137	157	120	89	221	36	25	32	82	147	44
228	0	1	0	0	0	0	57	0	0	0	0	0	0	0	0	0	0	0
229	70	47	63	34	44	25	22	80	44	16	34	86	6	33	30	6	56	28
230	0	0	0	9	0	0	45	1	4	0	1	0	0	0	0	0	0	0
231	2	0	31	41	60	28	70	34	0	120	61	0	18	0	1	148	59	54
232	7	15	96	30	35	63	24	34	58	62	38	39	12	6	15	4	61	13
233	48	239	172	101	123	179	229	219	173	97	76	202	44	99	26	177	167	390
234	132	201	225	269	589	780	179	193	218	378	229	349	180	222	349	345	182	170
235	22	48	62	11	7	44	51	34	22	22	20	6	8	1	0	7	34	20
236	37	0	9	169	47	411	66	0	0	0	62	0	57	45	0	2	25	1
237	0	0	0	5	18	30	15	22	6	5	25	49	57	32	11	56	40	38
238	6	87	13	16	46	10	78	52	72	41	21	72	3	12	20	131	148	56
239	1	6	1	0	16	5	14	0	1	0	0	0	0	0	0	0	0	27
240	14	9	7	2	13	11	19	7	5	6	31	3	0	0	0	0	0	2
241	62	69	46	64	36	31	138	155	189	336	117	200	224	87	110	133	116	163
242	70	7	26	1	62	16	33	9	28	0	0	0	0	0	0	0	0	13
243	19	79	47	9	30	20	15	29	21	54	32	114	16	12	19	50	48	14
244	142	187	192	103	271	242	68	45	53	67	165	154	172	331	319	284	94	44
245	75	0	0	0	34	1	86	0	58	1	43	21	0	112	0	57	0	51
246	34	104	19	30	6	20	72	12	29	63	44	34	7	0	31	31	24	0
247	1	31	15	0	0	16	11	3	6	2	1	7	0	0	0	5	0	0
248	0	0	0	0	0	0	6	0	11	0	0	0	0	0	0	0	0	0
249	0	0	0	0	0	0	65	0	0	0	1	0	0	50	0	0	0	0
250	53	36	58	157	299	95	100	80	84	427	123	169	146	223	149	143	159	98
251	668	502	394	390	703	422	220	360	357	139	248	268	275	214	369	508	222	120
252	54	22	42	17	15	15	19	41	19	11	18	10	8	7	11	19	17	10
253	0	0	0	0	0	2	26	0	0	0	0	0	0	0	0	0	0	0
254	13	5	11	40	19	1	24	77	64	38	18	22	26	26	46	10	55	20
255	0	0	39	0	0	53	26	49	0	78	43	21	77	0	16	0	79	0
256	7	7	0	0	13	0	8	3	20	0	1	5	1	0	0	3	30	0
257	2	1	10	0	0	3	20	16	16	0	6	14	0	1	0	0	0	1
258	233	266	111	63	153	34	388	229	95	1	47	1	185	562	152	115	304	63
259	0	0	0	0	0	2	19	3	0	0	7	0	0	15	4	0	0	0
260	132	139	84	35	58	58	115	96	59	81	46	155	39	16	9	57	58	25
261	292	77	70	89	154	120	49	52	52	157	107	94	73	40	150	60	112	55
262	0	0	0	0	0	0	6	0	0	0	0	0	0	0	0	0	0	0
263	1	1	0	34	29	10	92	78	27	125	68	165	30	121	54	11	86	68
264	0	1	3	10	61	7	27	19	67	7	21	6	184	35	37	10	7	101
265	0	0	0	0	0	0	15	0	0	0	0	0	2	3	0	0	0	0
266	96	87	80	51	89	45	52	68	85	123	21	39	3	14	11	85	53	25
267	0	0	0	0	0	0	33	0	0	0	0	0	0	0	0	0	0	0
268	11	13	4	4	21	4	12	6	2	1	0	8	0	0	0	0	1	0
269	155	94	193	145	42	65	164	85	81	222	46	197	18	43	40	103	246	49
270	1	0	0	0	0	13	24	26	19	0	29	0	0	59	0	0	0	0
271	0	1	0	2	0	7	3	7	0	1	0	8	7	0	16	12	3	0
272	150	137	73	58	35	39	15	53	52	8	27	14	39	68	23	13	132	11
273	37	27	63	53	81	67	49	17	28	11	90	97	33	35	19	93	45	7
274	0	2	16	10	0	0	12	7	3	3	0	3	0	0	0	16	6	13
275	22	7	42	9	13	12	6	9	37	10	16	13	6	21	9	13	16	16
276	15	51	45	24	8	20	27	36	60	72	14	6	17	22	1	8	1	2
277	18	61	33	10	24	37	50	37	33	17	33	18	8	7	5	8	49	22
278	828	853	715	599	708	870	454	602	460	946	773	827	703	1131	1170	665	803	515
279	176	132	317	174	247	207	183	303	244	90	71	107	54	73	65	108	73	36
280	9	24	7	1	7	4	2	0	0	4	2	20	0	7	6	0	6	0
281	0	2	2	2	0	7	13	0	0	156	0	0	0	0	0	2	0	0
282	31	162	51	15	72	56	45	126	61	76	127	27	23	10	27	75	35	111
283	0	0	0	0	0	5	29	0	0	0	0	0	0	0	0	0	0	0
284	47	0	52	0	0	0	66	0	0	28	42	1	0	0	0	0	66	0
285	2	2	10	6	28	1	48	5	16	15	5	2	2	0	0	14	0	0
286	0	0	0	18	8	0	9	20	3	38	1	13	0	0	23	7	37	92
287	12	9	12	8	9	16	17	10	5	5	5	3	8	16	8	15	3	6
288	33	27	0	27	0	1	52	0	0	2	0	74	54	0	0	0	0	0
289	29	27	11	13	20	10	21	4	28	25	12	32	36	11	13	10	11	47
290	0	13	2	0	0	46	69	0	2	6	1	1	113	0	0	0	2	26
291	13	27	25	11	16	34	46	71	52	9	20	7	8	1	2	17	88	8
292	9	16	60	4	13	5	23	4	12	18	20	4	29	16	44	7	1	6
293	20	6	14	10	14	15	39	18	15	13	8	13	1	17	25	8	14	1
294	12	27	7	4	1	0	4	2	13	0	3	7	0	0	0	0	16	3
295	16	6	33	30	3	10	13	14	23	27	11	10	4	1	16	2	7	18
296	0	0	0	0	0	0	21	0	0	0	3	0	0	0	0	0	0	0
297	62	145	49	56	64	50	111	153	144	185	143	119	223	288	362	214	141	48
298	0	0	0	12	29	0	122	19	1	0	7	0	0	96	0	0	0	185
299	0	4	0	0	3	4	12	0	0	0	3	2	2	0	0	2	0	1
300	32	44	47	121	0	865	98	24	0	61	1	22	66	55	40	47	6	0
301	0	28	1	0	0	142	15	0	0	0	37	0	49	70	75	0	0	157
302	0	0	2	0	0	2	3	0	0	0	0	0	1	32	0	0	0	0
303	46	54	84	21	59	50	40	65	50	30	14	35	24	23	66	8	52	21
304	13	164	105	2	29	7	16	35	27	69	14	16	6	0	5	0	21	20
305	1	0	0	0	0	0	12	2	1	1	3	0	0	0	0	0	6	0
306	391	399	521	130	83	236	318	290	255	339	114	145	150	141	140	121	286	177
307	369	306	295	397	433	244	361	329	457	546	440	501	544	693	1120	672	398	390
308	0	5	18	1	1	6	11	0	6	1	11	8	8	2	0	7	0	0
309	0	0	0	0	0	0	7	0	0	8	0	0	0	0	0	0	0	0
310	19	0	0	2	0	3	4	0	0	0	0	0	0	0	0	0	0	0
311	0	0	2	0	0	0	18	7	0	0	7	1	0	9	6	0	0	0
312	11	7	33	59	44	18	96	122	72	0	0	13	50	29	2	7	0	0
313	54	72	0	0	0	192	83	1	0	58	12	22	0	0	0	106	33	0
314	0	0	0	0	0	0	4	0	0	0	0	0	1	0	0	0	0	0
315	2	0	3	1	5	0	2	0	4	5	4	13	9	1	2	1	0	0
316	171	132	67	83	64	213	61	104	113	55	104	141	73	106	125	52	96	64
317	42	27	8	23	35	51	37	3	8	4	25	8	7	113	43	16	5	6
318	16	32	54	9	26	9	30	13	10	10	6	1	11	7	23	2	14	1
319	0	0	0	0	0	1	107	0	0	0	0	0	1	0	0	0	0	0
320	17	30	1	7	15	15	7	3	32	2	7	4	0	17	5	7	0	0
321	17	21	15	30	23	22	14	34	5	19	20	22	8	0	9	16	23	17
322	258	572	296	187	332	253	298	441	629	293	283	538	180	142	69	333	284	470
323	11	37	42	44	100	230	24	17	106	7	44	23	52	49	41	69	37	45
324	1	9	3	3	31	4	4	5	17	1	4	2	5	4	6	0	7	1
325	0	3	0	0	0	0	6	0	0	0	0	0	0	0	0	0	0	0
326	44	61	54	91	52	95	33	28	26	51	70	73	80	187	255	28	16	5
327	56	28	13	46	34	15	18	48	8	20	18	39	0	2	26	67	9	18
328	21	5	26	1	14	24	10	14	20	1	28	14	23	50	22	8	12	3
329	8	26	29	40	77	46	94	56	73	40	51	86	259	12	35	127	39	46
330	0	0	1	10	1	4	26	22	1	0	1	2	22	11	27	0	0	0
331	69	83	54	85	107	37	73	174	115	307	104	77	93	121	115	79	252	94
332	10	29	39	21	22	23	35	27	64	22	57	81	18	0	27	6	136	11
333	23	10	15	4	24	12	11	6	4	8	6	6	0	0	5	3	0	2
334	25	22	13	3	24	6	11	27	42	8	13	14	14	1	14	9	2	5
335	119	161	101	112	114	38	35	97	60	39	70	85	32	118	116	53	50	14
336	1	38	49	64	25	47	81	61	75	55	25	156	1	0	1	17	38	4
337	58	85	41	21	53	31	47	49	95	45	47	26	24	2	10	71	30	84
338	43	67	11	6	16	1	51	15	35	40	29	6	14	1	8	8	9	15
339	10	30	29	28	22	18	31	39	82	53	40	87	9	20	53	53	25	17
340	0	0	0	0	2	0	16	0	0	0	0	0	0	0	0	0	0	0
341	0	0	3	0	0	0	11	6	0	0	0	0	0	0	0	0	0	0
342	3	1	5	3	1	0	5	4	0	0	0	0	0	0	0	0	0	0
343	0	0	1	0	0	3	6	0	1	3	0	0	0	0	0	0	0	0
344	12	76	35	22	50	23	58	103	58	31	47	78	82	71	92	67	69	51
345	21	71	69	37	54	44	113	48	49	76	35	160	8	3	6	61	36	10
346	24	44	98	63	93	94	52	122	61	95	29	114	19	2	36	22	135	13
347	0	13	1	0	1	0	7	18	10	22	0	0	0	0	0	0	0	16
348	288	79	137	71	60	47	47	58	25	45	35	31	29	72	14	159	27	14
349	563	298	337	141	257	128	153	342	234	359	162	250	101	171	209	155	388	95
350	0	29	51	10	40	824	120	49	0	0	1	37	85	49	0	14	0	0
351	5	62	58	28	30	11	100	16	49	19	29	20	1	4	36	24	42	11
352	12	30	51	23	21	19	100	79	53	44	51	44	9	0	7	14	3	23
353	7	1	4	3	3	7	13	4	26	0	4	0	1	0	0	23	3	7
354	0	0	1	0	4	0	14	0	0	0	0	0	0	1	0	0	0	0
355	0	0	0	0	0	0	5	0	0	0	0	0	7	1	2	1	0	0
356	8	3	11	19	5	28	18	0	1	3	1	3	2	8	24	8	10	0
357	138	59	60	31	87	57	53	72	68	145	103	106	65	124	42	59	54	159
358	0	0	0	34	56	58	165	28	0	0	16	0	0	74	0	5	0	1
359	0	6	1	1	1	1	27	17	10	11	0	4	3	0	1	5	20	0
360	1	9	5	30	21	10	15	11	11	1	1	8	3	12	12	11	6	3
361	126	148	110	115	117	102	100	172	116	157	84	122	126	149	157	88	119	21
362	0	0	13	0	0	0	34	5	13	7	0	0	0	0	0	0	2	4
363	0	0	0	0	0	19	48	0	0	33	0	0	0	3	0	2	1	0
364	24	59	60	50	61	20	42	65	27	14	34	28	20	21	15	25	10	3
365	0	7	0	1	7	0	20	0	10	26	1	5	2	0	0	3	2	1
366	21	23	7	6	8	59	32	5	3	0	2	0	10	48	11	1	5	8
367	0	3	0	5	3	0	10	2	0	0	0	0	0	8	2	2	0	0
368	0	0	0	0	0	1	14	0	0	0	0	0	0	0	0	0	0	0
369	54	69	108	45	57	55	37	183	14	27	43	78	110	62	163	87	84	39
370	17	25	12	15	10	15	14	18	33	13	42	27	83	40	7	92	43	4
371	0	0	0	0	0	0	41	0	0	0	0	0	0	0	0	0	0	0
372	49	0	0	33	61	25	65	2	0	0	42	0	0	6	1	19	0	0
373	25	47	52	12	24	25	76	32	66	26	20	43	5	33	19	10	29	38
374	105	194	128	84	59	77	189	166	120	212	134	171	60	31	35	99	122	33
375	63	79	65	129	67	93	49	98	66	7	59	55	35	60	66	15	47	47
376	107	112	230	61	92	81	23	65	107	16	14	11	19	3	2	73	25	25
377	0	0	0	12	30	0	19	0	0	0	6	11	0	0	7	0	66	21
378	13	0	11	4	11	0	18	0	18	42	2	15	0	0	0	1	10	4
379	15	20	32	9	92	26	107	88	42	7	6	5	5	2	33	3	60	3
380	0	0	0	0	0	1	68	0	0	1	0	0	0	0	0	0	0	0
381	0	1	0	0	0	0	32	0	0	2	0	0	1	0	0	0	0	0
382	29	53	33	57	86	128	33	25	83	210	52	57	107	57	77	36	70	84
383	12	4	18	23	16	11	39	16	36	14	12	14	1	10	2	5	41	4
384	46	178	144	52	387	97	58	198	95	12	118	95	102	163	263	177	64	44
385	9	84	15	71	45	89	57	25	42	2	12	28	22	12	34	157	26	5
386	0	22	77	28	24	32	114	25	51	10	1	3	0	0	0	13	14	0
387	287	65	65	72	88	60	11	136	60	150	55	144	308	114	107	146	103	277
388	1	5	14	0	25	30	82	2	0	9	10	0	1	0	7	4	2	6
389	87	187	120	107	115	89	251	152	275	133	124	161	70	18	56	127	232	61
390	12	46	131	25	44	67	71	144	76	27	39	43	56	4	20	99	55	71
391	10	15	31	3	2	11	27	19	14	12	18	0	0	0	0	14	0	1
392	5	0	3	0	22	0	13	11	19	1	1	4	17	0	2	0	2	0
393	4	5	7	0	8	0	9	0	1	0	6	0	10	7	0	3	0	0
394	430	294	177	145	159	201	348	475	450	171	115	153	146	51	104	177	490	106
395	9	28	41	13	43	24	21	18	35	39	8	17	13	0	5	24	9	5
396	1	27	108	33	58	15	78	27	20	17	18	25	4	0	2	22	27	4
397	0	0	0	6	1	10	6	0	12	0	5	3	0	11	0	0	1	6
398	0	0	0	0	12	1	7	1	2	4	2	3	0	0	6	0	0	0
399	3	0	1	0	5	0	8	7	1	0	1	0	0	0	0	0	0	0
400	0	0	0	1	0	2	17	1	0	0	2	0	1	0	0	0	2	0
401	0	0	0	0	0	0	9	0	0	0	0	0	0	0	0	0	0	0
402	0	0	0	0	12	0	2	1	0	0	0	8	0	0	0	0	0	0
403	0	0	0	81	0	226	2	51	39	0	66	0	35	200	86	0	39	0
404	4	0	0	0	0	0	8	1	0	0	0	1	0	0	0	0	6	0
405	49	177	13	11	14	18	132	89	177	21	315	31	7	0	5	78	6	9
406	3	0	0	1	0	4	14	1	3	0	0	0	0	0	0	0	0	1
407	1	1	13	0	3	5	19	5	36	9	1	0	1	23	0	3	38	0
408	0	0	0	0	0	8	48	0	0	0	0	0	0	0	0	0	0	0
409	24	50	48	253	45	18	33	21	13	104	15	4	38	33	46	52	22	0
410	0	0	1	0	0	0	10	2	0	3	1	10	0	0	0	0	0	0
411	1	0	0	0	0	0	15	0	1	3	0	0	0	0	0	0	0	0
412	9	20	35	8	5	6	44	9	76	2	3	0	1	0	4	0	5	85
413	186	86	158	68	50	62	57	106	67	150	70	40	50	97	50	134	211	39
414	2	9	15	11	16	25	13	27	13	0	6	26	45	5	9	75	78	22
415	27	86	82	11	31	16	9	23	14	36	33	44	80	8	22	8	15	23
416	81	103	74	123	564	126	65	407	60	215	71	168	952	248	934	286	119	50
417	0	0	0	0	0	15	39	0	0	0	0	0	0	21	0	0	0	39
418	0	1	0	0	1	2	13	0	0	0	0	0	5	0	0	0	0	0
419	12	54	12	9	13	27	36	18	19	36	11	18	19	6	14	0	36	1
420	72	76	53	50	27	44	82	81	60	218	64	100	39	22	36	72	123	46
421	13	23	45	20	3	33	44	63	59	32	2	52	45	5	18	22	175	0
422	0	21	57	38	36	0	254	17	0	6	0	20	0	93	82	19	0	32
423	21	41	27	4	93	17	60	19	5	13	15	21	24	18	25	68	23	22
424	0	1	7	0	0	4	13	1	2	18	0	1	4	0	0	0	0	0
425	2	55	14	17	19	8	24	21	30	23	45	6	0	0	12	28	10	10
426	13	58	93	77	60	50	39	75	92	0	5	0	17	0	2	1	11	13
427	124	202	72	169	12	19	85	64	139	14	42	55	39	94	300	1	35	3
428	0	2	1	102	2	0	46	1	106	0	119	0	0	0	52	0	0	1
429	15	81	80	17	26	72	100	41	187	31	21	18	14	1	5	31	37	50
430	0	1	1	0	1	2	15	1	0	20	0	0	0	0	0	1	0	30
431	4	0	0	33	74	0	60	0	0	38	0	0	0	0	95	0	1	0
432	17	37	18	22	45	26	69	56	65	24	35	57	41	81	52	32	71	32
433	0	0	0	0	0	0	26	0	0	0	0	0	0	0	0	0	0	0
434	1	2	7	0	4	10	15	0	0	0	0	3	0	0	2	0	0	1
435	7	22	43	22	23	42	10	11	18	19	19	6	11	40	12	23	13	29
436	0	0	0	9	0	0	31	0	0	0	0	0	0	0	0	0	0	0
437	0	0	0	0	0	0	39	0	0	0	0	0	0	0	0	0	0	0
438	0	0	0	0	0	0	22	0	0	0	0	0	0	29	0	0	22	0
439	1	0	0	9	9	1	4	5	0	7	2	5	0	0	0	1	12	0
440	65	159	98	40	54	48	90	132	87	92	53	66	165	89	57	148	289	46
441	36	15	22	10	4	10	4	14	14	8	5	9	8	8	3	2	22	2
442	1	7	28	1	1	1	19	41	3	24	27	1	0	3	3	20	3	1
443	48	112	140	34	104	39	56	85	47	41	30	63	8	0	13	51	53	6
444	0	0	0	0	1	0	1	0	2	0	0	0	0	0	0	1	0	0
445	1	9	0	4	3	12	25	47	71	0	11	7	2	1	1	6	0	0
446	86	38	35	6	16	24	24	64	71	31	24	26	18	1	17	28	16	4
447	60	57	114	71	171	47	101	154	225	66	98	124	167	142	131	809	98	81
448	3	16	34	39	23	8	46	37	54	44	7	18	8	0	0	19	53	8
449	66	75	98	21	114	61	74	107	118	58	20	41	41	4	40	13	24	34
450	222	571	339	61	117	129	94	134	207	81	120	203	63	16	41	98	204	104
451	80	43	47	51	51	28	28	37	76	110	45	72	30	13	15	50	64	17
452	85	137	122	119	223	307	18	23	35	37	47	78	64	231	88	170	68	15
453	63	77	74	80	363	154	83	61	30	27	59	50	139	108	459	141	33	19
454	133	46	120	95	56	47	66	126	67	220	63	146	22	30	50	30	187	13
455	0	0	0	0	0	0	62	1	0	0	0	0	0	1	0	0	1	0
456	110	98	0	82	117	38	23	176	35	29	48	86	164	197	2	57	89	74
457	1	20	3	10	14	6	19	2	3	13	1	0	1	0	0	0	2	0
458	171	128	60	58	77	61	76	211	165	213	87	208	100	64	142	167	111	84
459	1	23	28	52	36	42	76	39	41	26	23	65	200	31	12	122	28	57
460	5	16	5	9	15	22	49	35	11	6	10	1	4	18	17	2	0	1
461	106	65	55	33	28	40	77	60	23	130	41	14	36	31	41	61	57	5
462	0	29	24	7	5	28	25	31	11	26	8	46	11	17	6	0	4	2
463	1	6	0	0	0	4	5	0	8	25	5	5	0	10	13	22	1	0
464	4	7	8	5	57	43	45	50	47	25	61	85	17	101	3	27	31	182
465	10	5	17	13	23	5	21	107	53	64	15	37	42	93	118	22	22	48
466	0	5	0	0	5	3	25	9	12	1	4	6	9	0	1	15	1	8
467	0	0	0	0	0	0	7	0	0	0	0	0	0	0	0	0	0	0
468	32	0	1	0	0	58	32	0	0	0	0	0	0	0	0	1	0	0
469	0	21	0	0	0	0	9	16	19	0	8	2	0	0	0	0	0	0
470	45	180	2	12	4	28	26	53	9	22	2	27	1	0	32	9	21	1
471	6	16	10	7	18	9	49	20	41	32	7	50	24	22	7	63	8	82
472	0	1	0	0	1	0	12	0	0	1	0	0	0	0	0	2	8	0
473	33	55	96	69	44	58	130	87	40	106	37	129	5	0	0	51	50	25
474	0	0	2	110	48	0	81	3	38	66	0	1	0	4	8	2	25	28
475	85	45	50	17	24	39	31	85	64	167	35	110	52	43	53	80	38	40
476	2	0	2	2	5	0	16	8	19	67	13	12	28	14	3	5	16	45
477	38	15	19	33	17	8	5	16	37	50	7	49	11	31	20	25	23	47
478	0	9	17	0	2	2	7	3	2	0	0	0	0	0	0	6	0	70
479	2	5	6	8	2	3	10	13	0	0	3	19	7	35	17	1	0	1
480	50	48	44	21	24	9	31	42	79	46	26	49	35	28	8	45	157	25
481	0	14	1	1	7	5	6	0	1	0	0	0	0	0	0	0	0	1
482	56	84	21	14	36	11	34	4	16	6	9	10	37	12	8	4	1	22
483	0	1	0	1	0	0	15	0	0	0	0	0	0	0	0	0	0	0
484	9	32	23	49	147	149	104	99	271	88	226	51	41	70	3	98	76	595
485	151	198	143	34	45	83	77	103	121	84	44	63	39	103	10	46	79	43
486	64	65	56	70	43	14	28	24	10	19	14	33	28	5	10	19	13	72
487	5	18	14	14	21	7	10	17	8	0	10	3	1	8	2	0	0	77
488	0	0	0	0	3	1	8	0	2	0	3	6	1	2	0	12	0	0
489	40	11	21	34	35	32	47	62	61	115	3	29	1	14	24	12	122	3
490	1	8	0	6	8	1	16	16	21	18	20	32	14	34	87	11	12	7
491	4	0	0	1	0	2	12	15	1	12	0	0	3	4	2	0	9	7
492	20	4	5	3	25	5	17	19	0	0	26	0	0	7	2	2	0	1
493	45	34	10	11	35	26	45	8	39	34	20	14	52	39	25	11	14	18
494	0	7	0	4	0	0	9	1	8	8	0	14	0	0	1	18	12	0
495	1	0	0	1	6	2	51	8	4	0	12	7	3	2	2	1	11	7
496	0	13	24	44	1	185	19	79	34	7	0	2	5	47	43	64	44	14
497	0	14	13	0	0	4	21	0	0	0	0	0	0	0	0	0	0	0
498	0	6	1	0	0	2	10	0	0	0	0	0	0	0	0	0	0	0
499	0	0	0	0	0	0	13	0	0	0	1	0	0	0	0	0	0	0
500	19	1	8	0	0	0	18	5	2	4	0	17	0	0	4	0	1	0
501	0	0	0	0	0	0	7	0	0	0	0	1	0	0	0	0	0	0
502	148	198	121	62	136	97	89	145	80	198	90	86	128	32	126	201	156	57
503	0	15	0	0	3	3	23	14	11	2	22	0	0	0	3	0	35	27
504	79	46	37	28	44	42	38	56	67	20	18	6	9	63	58	9	2	1
505	0	0	0	0	0	0	67	0	0	0	0	0	0	0	0	0	0	0
506	0	0	0	1	11	24	17	2	0	0	1	2	6	0	3	0	4	28
507	1	12	15	2	17	3	21	12	177	56	5	4	1	0	0	77	1	35
508	14	21	60	19	32	42	78	60	66	26	19	99	20	0	14	13	24	2
509	0	7	2	1	3	0	11	13	0	0	3	5	0	0	4	0	0	0
510	0	0	0	0	29	98	55	0	0	0	22	0	50	0	0	1	34	43
511	0	1	1	0	1	1	9	0	0	0	0	0	0	0	0	0	0	55
512	0	0	0	0	0	0	18	0	0	3	0	0	0	5	0	4	4	0
513	0	1	0	0	0	0	11	0	0	0	0	0	0	13	6	0	0	0
514	5	2	12	17	19	39	11	39	55	22	8	4	24	19	79	51	27	3
515	10	89	20	7	47	58	102	71	419	21	115	30	18	15	81	80	15	50
516	98	52	105	87	94	973	55	32	68	72	20	29	36	0	1	70	1	0
517	0	8	0	0	1	2	14	9	4	1	0	0	0	0	0	0	0	3
518	0	74	30	1	0	0	5	9	5	0	0	0	0	0	0	0	0	0
519	3	2	1	0	10	0	9	1	0	0	0	2	0	0	0	0	0	0
520	10	32	41	5	2	7	13	2	19	11	0	2	0	0	0	2	5	23
521	16	8	10	13	8	3	12	6	14	8	11	31	20	22	54	7	22	16
522	7	142	30	0	1	48	29	37	59	10	7	9	15	4	5	2	20	70
523	0	11	0	1	1	16	18	7	1	0	0	3	0	10	1	0	31	0
524	1	4	1	2	0	0	34	22	7	5	9	1	9	36	24	3	10	3
525	1	0	0	0	2	0	4	3	1	0	0	0	0	0	0	0	7	0
526	0	25	0	0	0	121	39	0	0	0	0	0	0	0	0	0	0	0
527	57	147	92	4	24	7	30	13	62	16	3	17	4	0	3	3	1	8
528	0	0	0	0	0	0	13	0	0	0	0	0	0	0	0	0	0	0
529	23	35	37	16	25	10	74	21	37	67	46	19	2	1	1	20	19	104
530	0	0	0	0	0	0	8	2	0	0	0	0	0	0	0	0	0	0
531	25	0	5	0	0	0	35	0	50	48	15	0	0	0	0	0	0	0
532	0	0	1	0	5	7	95	5	0	2	0	0	0	0	0	0	5	0
533	7	2	1	2	3	1	2	0	2	2	3	5	0	0	0	0	0	1
534	3	4	4	2	0	0	20	2	1	8	1	17	4	6	3	0	8	2
535	0	4	29	7	1	17	4	2	1	0	0	0	0	1	0	17	2	5
536	127	62	35	24	70	62	35	94	100	132	67	93	67	22	90	30	21	20
537	0	0	0	40	0	19	41	0	0	45	0	0	45	48	30	105	0	0
538	7	7	18	13	22	17	40	45	36	38	10	43	51	37	54	43	25	15
539	0	0	2	0	1	0	21	0	3	12	14	10	23	12	19	3	0	5
540	0	0	0	0	0	0	39	0	0	0	0	0	0	0	0	0	0	0
541	27	27	18	2	15	3	15	8	6	37	12	10	18	38	5	33	25	8
542	0	0	0	0	0	0	3	0	0	0	0	0	0	0	0	0	0	0
543	149	97	83	99	144	104	59	110	64	24	20	54	215	178	176	105	196	25
544	0	4	6	0	1	2	8	5	4	0	1	0	0	16	6	11	0	0
545	12	41	35	8	14	2	5	15	11	0	8	2	8	14	1	8	1	0
546	26	57	37	22	28	33	27	12	23	2	16	30	52	16	56	75	26	30
547	0	5	0	0	3	0	18	1	1	3	0	0	0	0	0	0	0	0
548	7	35	22	8	13	6	17	41	19	8	1	7	10	16	76	2	10	0
549	0	0	4	0	8	15	31	20	12	18	26	20	54	9	100	17	0	14
550	100	21	67	33	34	19	13	14	29	110	64	68	36	40	30	43	45	18
551	76	97	79	17	63	30	66	51	77	91	98	68	36	16	23	6	79	26
552	0	1	0	34	0	130	27	9	22	43	32	0	30	0	34	1	22	0
553	2	0	0	18	0	65	38	1	0	0	1	0	0	36	0	0	24	0
554	0	0	0	0	0	0	4	0	0	0	0	0	0	0	0	0	0	0
555	0	4	0	0	0	0	2	0	0	0	0	0	0	0	0	0	0	0
556	49	65	41	22	32	36	56	45	43	8	48	37	50	8	10	40	7	2
557	7	15	3	13	10	2	26	24	27	2	6	14	11	4	34	7	21	1
558	5	0	1	5	9	0	69	78	90	0	0	0	1090	242	289	7	5	2
559	674	809	451	119	327	339	398	548	639	371	334	598	674	264	224	475	491	275
560	0	0	0	0	5	2	25	2	5	0	0	0	0	0	0	2	0	0
561	0	0	0	0	0	0	51	0	0	0	0	0	1	0	0	0	0	0
562	0	0	0	0	1	0	17	0	3	0	0	0	0	0	0	0	0	0
563	0	0	0	0	0	0	68	0	0	0	0	0	0	0	0	0	0	0
564	1	4	0	6	0	8	36	16	13	15	4	5	0	32	0	10	44	14
565	0	0	0	0	0	0	8	0	0	0	0	0	0	0	0	0	0	2
566	0	8	0	0	4	2	1	1	5	0	0	6	0	0	0	3	9	5
567	8	14	60	0	0	2	21	6	0	12	2	4	0	0	3	2	4	0
568	26	12	0	0	2	0	15	18	2	1	0	9	0	0	0	0	0	1
569	0	1	0	22	29	4	3	0	4	2	0	22	16	0	16	0	0	19
570	3	0	3	0	0	0	9	6	1	0	0	2	0	0	0	6	2	0
571	2	0	1	0	0	0	4	0	0	0	0	0	0	0	0	0	0	0
572	0	13	65	22	27	22	55	77	41	55	17	37	0	0	13	21	170	2
573	7	7	21	4	5	13	48	35	13	22	11	38	0	0	16	10	11	13
574	0	0	0	0	2	0	2	2	7	0	0	1	0	0	0	22	0	0
575	2	0	10	5	1	3	9	0	2	3	7	2	0	0	2	1	0	0
576	6	21	10	9	23	9	38	29	4	12	1	7	1	0	0	1	0	4
577	21	48	153	44	119	39	143	132	73	39	33	86	12	46	42	12	98	20
578	0	0	1	0	0	0	13	0	0	0	0	0	0	0	0	0	0	0
579	26	0	0	22	70	162	71	21	55	0	18	92	19	0	1	18	71	22
580	2	4	17	49	2	1	71	61	32	1	18	6	0	0	1	7	32	2
581	1	6	23	0	4	2	3	0	1	0	0	0	0	0	0	0	0	0
582	34	34	38	188	74	62	47	57	46	18	137	14	18	210	55	138	7	10
583	109	164	171	97	151	75	53	99	146	36	48	57	133	71	70	195	49	42
584	29	61	63	3	24	9	62	41	30	0	10	2	18	3	0	0	19	0
585	16	13	23	11	20	0	18	10	3	23	1	1	0	2	0	0	25	4
586	2	1	6	0	0	2	11	14	12	0	0	3	2	2	0	0	0	0
587	0	3	0	1	0	5	2	0	6	0	2	1	1	1	0	1	1	0
588	407	285	187	258	252	90	237	278	242	559	148	187	257	144	176	194	443	138
589	7	6	9	0	6	1	14	4	11	0	0	0	0	0	1	6	0	0
590	4	50	3	3	5	6	8	18	15	1	22	1	0	0	0	3	0	6
591	0	0	18	4	27	23	10	9	8	0	0	0	4	0	0	0	7	0
592	34	20	33	69	62	54	23	14	46	5	14	67	53	12	30	12	25	8
593	0	0	0	0	0	0	36	0	0	0	0	0	0	0	0	0	0	0
594	10	1	5	4	4	0	12	9	1	7	0	2	0	0	0	2	0	0
595	0	0	14	0	2	0	2	3	0	0	0	0	0	0	0	0	0	0
596	3	31	16	5	16	2	15	25	19	1	42	3	0	12	0	28	67	7
597	6	11	27	3	9	20	25	33	13	24	14	16	8	17	5	13	30	0
598	40	15	11	10	3	2	27	35	37	31	27	27	14	0	14	6	28	19
599	138	122	84	7	45	45	36	65	90	191	67	52	72	101	65	137	28	34
600	1	0	6	0	0	0	3	6	0	0	1	0	0	0	0	0	0	0
601	0	9	1	1	0	1	19	0	7	0	2	2	0	2	1	2	3	0
602	0	1	10	0	0	6	6	2	3	2	2	3	0	0	0	0	0	1
603	99	122	93	40	41	57	66	89	121	54	40	41	40	21	33	48	25	51
604	2	0	0	0	2	0	6	3	0	0	0	0	0	0	0	0	0	0
605	0	0	0	0	0	0	11	0	0	0	0	0	0	0	0	0	0	0
606	217	126	74	53	82	49	76	169	74	115	36	124	73	63	98	141	156	25
607	172	92	175	20	144	128	20	64	21	149	70	120	132	282	170	93	282	139
608	0	0	0	0	0	0	28	0	0	0	0	0	0	0	0	0	0	0
609	0	0	1	1	3	1	60	1	4	0	15	2	1	0	2	0	0	79
610	0	0	0	0	0	0	11	0	0	0	0	0	0	0	0	0	0	37
611	0	3	0	0	1	6	16	1	81	0	17	4	9	1	1	0	1	7
612	0	0	0	0	0	0	26	0	0	0	0	0	0	0	0	0	0	0
613	0	0	0	0	0	0	51	0	0	0	0	0	0	0	0	0	0	0
614	0	0	0	0	0	0	25	0	0	0	15	0	0	0	0	0	0	0
615	0	6	13	0	10	9	23	8	46	0	0	0	0	0	0	0	0	0
616	401	276	130	103	204	94	139	223	233	674	146	425	315	142	212	295	602	274
617	5	1	29	12	34	11	22	20	20	2	0	0	7	0	2	0	1	10
618	37	107	86	92	42	69	38	77	57	21	32	80	82	100	84	49	40	121
619	24	17	12	6	47	8	18	33	32	0	8	5	16	2	0	0	0	14
620	66	105	47	28	68	33	38	78	20	9	19	18	45	55	21	52	15	14
621	2	7	0	0	4	1	12	7	7	0	2	1	7	0	0	8	23	0
622	166	62	90	813	30	33	33	941	2	23	848	3	57	892	346	76	265	207
623	0	0	0	0	0	0	26	0	0	0	0	0	0	0	0	0	25	0
624	0	7	1	7	35	20	3	0	0	3	9	21	0	1	10	0	2	0
625	0	0	0	0	0	0	8	0	0	0	0	0	0	0	0	0	7	2
626	51	56	42	18	49	48	220	43	35	53	43	18	58	18	27	27	68	5
627	0	0	0	3	0	4	12	0	0	5	0	0	0	0	0	0	0	0
628	26	4	2	26	1	12	7	2	2	6	2	26	16	5	5	23	14	28
629	0	5	0	5	0	0	10	3	0	0	0	0	0	0	0	0	0	0
630	0	32	11	8	0	5	36	50	23	57	4	2	0	1	6	0	18	2
631	3	2	13	4	4	7	18	41	8	30	11	9	0	0	13	1	72	0
632	0	25	35	0	14	9	18	5	8	4	2	22	2	0	0	0	0	14
633	0	0	0	0	0	0	12	0	0	0	1	0	0	0	14	17	6	0
634	0	11	0	0	3	1	5	2	4	0	8	11	8	15	12	6	2	1
635	0	0	0	0	0	25	2	0	0	0	0	0	0	0	0	0	0	0
636	0	0	0	0	0	0	14	0	0	0	0	1	0	0	0	0	1	64
637	93	151	78	20	56	106	74	108	68	32	23	20	82	74	107	12	17	4
638	7	12	10	3	6	3	70	58	46	3	18	15	16	13	19	5	8	0
639	12	5	46	0	1	0	8	4	49	2	6	2	2	0	0	0	0	2
640	6	11	0	3	0	0	23	0	0	0	0	0	11	0	0	0	20	0
641	0	0	0	0	0	0	26	0	0	0	0	0	33	0	0	0	0	0
642	0	0	0	0	0	19	52	0	0	0	0	0	0	0	0	0	0	0
643	17	15	11	8	11	0	21	19	32	20	2	27	1	10	9	44	31	1
644	0	9	24	2	5	5	31	2	16	16	5	28	12	5	20	4	2	1
645	0	0	0	8	0	0	26	0	1	0	1	1	0	0	0	0	3	0
646	8	16	36	11	20	12	16	32	33	18	23	7	11	2	20	27	4	7
647	1	0	0	0	0	0	4	0	0	0	0	0	0	0	4	0	0	0
648	0	0	0	0	0	0	30	0	0	0	0	0	0	0	0	0	0	0
649	0	0	0	38	0	0	34	0	0	0	0	0	0	0	0	0	0	0
650	0	1	0	0	1	16	2	0	0	0	0	0	0	0	0	0	0	0
651	27	46	55	43	93	28	90	30	87	69	155	13	0	0	6	35	27	55
652	44	0	0	21	0	0	139	0	0	0	31	0	0	0	0	0	0	0
653	27	20	9	7	9	12	56	26	18	11	13	17	4	15	8	10	4	0
654	13	14	40	68	80	96	56	44	91	4	17	40	32	5	27	3	38	22
655	0	0	0	0	0	0	32	0	0	0	0	0	0	0	0	0	0	0
656	4	41	7	4	1	12	10	14	33	35	17	20	9	2	66	2	32	0
657	0	0	0	0	0	0	43	0	0	0	0	0	0	0	0	0	0	0
658	0	0	0	0	0	0	5	1	1	0	0	6	31	1	19	10	0	0
659	1	27	11	26	10	14	24	10	21	0	12	15	10	12	0	35	32	17
660	21	20	4	12	22	3	22	48	22	4	2	24	39	11	11	11	13	28
661	10	16	11	10	48	25	52	23	49	57	45	59	36	130	126	23	135	32
662	213	169	146	48	70	73	66	100	138	113	49	59	60	51	25	83	64	34
663	0	9	13	14	9	4	32	8	8	0	0	4	0	0	0	0	0	0
664	2	24	0	1	0	4	35	5	12	7	9	8	9	31	21	3	2	2
665	0	0	0	0	0	0	39	0	0	0	0	0	0	0	0	90	0	0
666	0	0	0	0	0	0	11	0	0	0	0	0	0	0	0	0	0	0
667	0	12	2	1	6	6	5	0	13	0	115	1	2	0	0	0	1	49
668	0	1	0	0	0	0	9	0	0	0	0	0	0	0	0	0	0	0
669	0	0	0	0	0	0	31	0	0	0	0	0	0	0	0	0	0	0
670	312	402	299	149	292	234	206	281	317	296	315	280	273	202	358	233	427	152
671	0	0	0	0	0	0	24	0	0	0	0	0	0	0	0	0	0	0
672	0	0	18	0	0	0	9	0	0	0	1	0	1	0	0	0	0	0
673	10	105	84	27	22	15	64	71	81	81	55	60	8	0	2	54	3	43
674	0	1	2	0	2	12	11	0	0	0	0	12	0	0	0	0	0	0
675	11	3	2	0	0	0	13	0	5	0	0	0	0	16	5	0	0	3
676	65	30	21	10	31	18	77	38	48	8	33	13	3	1	5	7	36	4
677	0	0	0	0	0	0	13	0	3	0	0	0	0	30	0	0	0	0
678	0	5	1	2	36	39	83	12	33	34	16	236	1	0	11	0	4	32
679	0	0	0	0	5	0	12	8	7	0	0	0	0	0	0	0	0	0
680	0	0	0	0	0	7	9	0	1	0	0	1	0	0	0	0	0	0
681	0	0	0	0	0	0	33	0	0	0	0	0	0	0	0	0	0	0
682	25	0	1	9	2	0	2	16	11	9	2	19	0	1	13	0	0	1
683	3	0	15	3	9	7	10	2	5	0	0	0	0	0	0	0	0	4
684	0	0	4	1	0	0	1	0	2	0	0	0	0	0	0	0	0	0
685	0	0	4	0	0	0	9	0	3	0	0	0	6	0	0	4	0	0
686	0	0	0	0	0	0	44	0	0	0	0	0	0	0	0	0	0	0
687	0	0	6	2	6	6	3	15	0	0	0	3	0	0	0	0	19	2
688	4	1	20	0	0	3	26	3	20	15	3	29	0	0	1	19	0	2
689	1	2	4	1	0	7	2	2	0	0	0	0	0	11	1	0	0	0
690	12	27	17	0	14	19	6	0	3	10	11	7	14	3	42	6	13	0
691	29	24	26	15	39	29	61	7	14	4	3	9	12	37	9	0	4	18
692	35	68	17	15	37	52	75	134	136	20	117	62	8	3	9	44	31	93
693	0	9	1	71	4	38	17	0	0	0	0	0	2	2	4	15	32	0
694	24	38	7	23	12	11	46	56	38	48	18	32	35	24	26	25	64	48
695	97	107	102	109	98	103	34	55	46	193	108	137	120	174	209	167	265	53
696	0	0	0	0	1	0	18	0	0	0	0	0	2	0	0	0	0	0
697	0	0	0	0	0	0	39	0	0	0	0	0	0	0	0	0	0	0
698	0	5	0	4	0	3	16	4	23	0	0	6	0	0	2	0	3	0
699	0	13	3	21	1	2	18	27	4	0	4	0	50	0	0	4	0	0
700	11	14	5	0	11	2	5	4	8	0	8	0	0	0	0	2	12	0
701	4	1	18	1	0	7	12	2	2	2	2	17	2	0	0	0	5	0
702	2	3	1	1	21	2	12	15	11	2	5	0	0	0	0	16	0	0
703	46	95	86	146	231	258	58	72	116	49	134	94	283	217	283	131	55	103
704	0	0	0	0	21	0	7	0	0	0	0	1	0	0	0	0	0	0
705	24	0	115	0	48	0	29	0	141	1	36	60	128	89	63	0	89	43
706	4	11	6	15	8	28	11	18	33	36	8	52	15	0	8	2	27	0
707	0	0	0	0	0	0	6	0	0	0	0	0	0	0	0	0	0	0
708	117	91	26	0	33	0	79	0	23	23	46	0	0	46	0	136	0	125
709	0	0	0	0	0	0	6	0	0	0	0	0	0	0	0	0	0	0
710	17	54	26	28	2	11	40	44	45	20	19	36	15	3	2	10	65	19
711	2	14	1	0	0	4	13	15	9	2	0	0	0	0	1	0	0	0
712	0	0	0	0	0	0	9	1	0	0	0	0	0	0	0	0	0	0
713	5	5	7	5	4	6	36	20	45	45	66	5	2	1	4	0	9	22
714	9	0	0	1	3	8	2	0	0	0	0	0	0	0	0	0	8	0
715	0	0	3	11	0	13	5	0	3	1	0	0	0	1	0	0	0	0
716	0	0	0	0	0	0	14	0	0	0	0	0	0	0	0	0	0	0
717	103	124	48	46	19	44	75	89	38	32	29	20	10	4	45	102	58	12
718	0	1	2	0	4	0	7	0	8	0	0	0	0	0	0	0	0	0
719	0	0	5	1	0	0	32	3	1	8	0	6	0	29	2	19	0	0
720	3	33	15	7	9	16	35	27	33	2	14	27	14	1	8	12	15	18
721	4	38	19	18	2	56	10	54	50	8	0	22	0	0	9	4	4	19
722	0	1	3	2	3	14	17	1	13	2	1	12	4	3	11	3	2	3
723	16	0	1	0	4	5	7	3	11	4	5	1	5	5	5	0	3	0
724	4	0	2	0	2	0	25	6	0	1	3	8	1	0	8	0	3	4
725	7	14	13	0	2	0	15	3	5	2	7	2	0	0	0	1	0	1
726	0	0	0	0	75	0	38	0	0	0	0	0	0	0	0	0	0	0
727	9	0	2	0	6	9	11	10	7	9	5	5	0	0	0	8	0	0
728	29	0	0	89	42	96	63	64	0	40	23	77	67	0	0	81	0	67
729	0	0	0	0	0	2	4	0	0	0	0	0	0	0	0	0	10	0
730	2	3	0	1	0	1	5	3	2	1	1	5	0	0	1	1	12	12
731	24	48	24	5	7	15	27	20	38	28	17	2	0	11	0	82	35	14
732	36	32	32	20	50	33	10	33	29	97	33	40	38	87	77	46	75	16
733	1	6	44	19	56	89	39	5	48	4	22	28	22	6	38	4	43	35
734	1	15	2	4	18	10	6	33	17	0	3	18	10	0	14	8	0	1
735	0	0	0	0	0	0	8	0	0	0	0	0	0	0	0	0	0	0
736	5	65	67	25	38	46	51	39	79	1	14	8	0	0	0	0	1	30
737	8	38	20	2	7	5	33	27	23	20	27	15	2	14	1	10	11	15
738	95	54	72	16	32	52	38	9	13	0	0	0	0	0	1	1	4	0
739	1	1	21	3	11	16	24	17	17	2	2	19	4	0	10	4	5	19
740	0	0	2	3	1	0	4	3	4	0	6	0	0	0	2	2	7	1
741	14	6	19	10	18	0	7	4	5	0	0	0	1	0	0	2	0	0
742	0	0	0	0	0	0	6	0	0	0	0	0	0	0	0	0	0	0
743	13	4	55	69	27	72	75	62	46	9	23	75	33	3	98	27	313	25
744	0	5	0	1	4	0	4	10	0	0	0	4	4	0	0	0	0	2
745	0	0	0	0	0	0	4	0	0	0	0	0	0	0	0	0	0	0
746	81	111	181	22	31	49	27	93	77	28	20	36	40	38	31	14	46	32
747	0	0	0	1	1	0	13	2	0	0	0	2	0	1	3	0	0	0
748	9	15	22	49	31	11	31	15	51	25	34	31	23	19	25	11	25	2
749	37	31	16	8	28	58	40	35	16	6	9	17	1	21	9	5	0	33
750	0	0	13	0	1	5	21	1	0	2	0	0	0	0	2	0	1	0
751	0	0	19	0	1	0	4	0	0	0	0	0	0	0	0	0	0	0
752	37	83	66	21	48	17	113	59	119	24	56	34	5	11	4	52	22	16
753	0	3	1	2	1	1	19	13	13	10	13	0	0	7	1	0	9	5
754	0	0	0	0	0	0	8	0	0	0	0	0	0	0	0	0	0	0
755	72	0	0	0	82	0	71	0	0	42	72	0	79	1	69	0	0	0
756	0	23	0	0	0	0	20	0	0	0	0	0	0	0	0	0	0	0
757	0	0	0	0	0	1	6	6	0	0	0	0	0	0	0	0	0	0
758	0	0	9	0	0	3	9	0	0	4	0	10	0	0	0	0	40	0
759	7	2	0	0	0	12	20	2	0	0	0	0	0	0	0	9	1	0
760	10	1	15	6	14	6	15	6	3	17	7	0	5	12	20	24	5	0
761	0	16	41	0	1	0	5	0	0	0	4	0	0	0	0	0	0	0
762	1	0	14	4	0	0	2	0	1	0	0	0	6	6	2	0	0	1
763	10	24	10	2	17	21	13	7	8	2	7	3	6	7	20	18	14	1
764	0	0	3	0	20	2	15	10	10	73	69	14	4	38	4	11	6	41
765	0	0	0	0	0	44	51	0	0	0	0	1	0	0	0	0	0	0
766	4	18	3	1	3	15	15	17	8	15	2	2	5	3	2	3	1	65
767	3	31	28	18	10	42	9	19	26	15	1	24	0	0	0	2	1	1
768	0	42	50	14	0	0	68	19	0	0	0	0	0	0	0	0	0	0
769	5	87	16	9	15	31	41	72	67	5	20	2	0	0	1	5	8	7
770	2	0	2	0	0	0	5	0	0	0	0	0	0	0	0	0	0	0
771	0	0	0	0	0	0	50	0	0	0	0	0	0	0	0	0	0	0
772	56	75	36	34	41	28	80	107	61	50	71	73	35	28	84	92	64	27
773	1	0	3	12	0	0	11	3	21	4	0	3	16	0	5	0	1	2
774	3	0	3	18	28	35	17	8	16	4	0	1	61	0	87	7	3	1
775	0	0	0	0	0	1	2	0	0	0	0	0	0	0	2	0	0	0
776	28	120	65	53	57	76	129	81	24	98	101	94	146	195	265	92	114	53
777	1	1	12	2	1	5	12	4	0	14	0	26	0	0	7	0	0	0
778	53	15	22	2	12	3	9	30	25	11	1	3	1	2	2	20	17	25
779	1	3	0	2	10	2	15	14	15	1	8	5	18	1	0	0	5	5
780	312	44	194	42	106	44	31	110	71	93	102	151	125	88	74	278	189	117
781	82	31	109	43	0	48	54	48	53	101	82	71	161	289	101	264	109	140
782	0	0	0	0	0	0	2	0	0	0	0	0	0	0	0	0	0	0
783	11	24	23	20	9	30	24	4	13	20	44	15	20	63	43	22	2	2
784	90	0	68	41	20	121	27	0	43	0	13	0	24	0	36	87	0	0
785	0	0	0	0	0	0	11	0	1	0	0	0	0	3	0	0	0	0
786	0	25	20	12	24	19	17	14	18	12	10	2	8	0	0	23	2	18
787	0	0	0	0	0	0	9	1	0	0	0	0	0	0	0	0	0	0
788	3	1	4	0	0	17	16	2	0	0	2	0	0	0	0	0	9	0
789	8	34	25	52	49	22	51	53	19	53	41	50	22	115	130	20	47	33
790	67	61	65	30	64	65	84	100	101	94	56	39	54	18	48	106	43	19
791	142	133	115	56	50	154	187	140	139	57	24	63	94	40	61	49	75	36
792	10	57	14	25	8	1	57	25	28	70	32	45	33	12	1	27	29	8
793	3	48	3	10	1	9	10	6	1	3	8	11	0	1	8	6	29	1
794	0	1	3	3	0	0	20	0	1	11	3	2	5	0	3	31	0	0
795	0	0	0	17	0	4	46	0	0	0	0	0	0	0	0	0	70	0
796	0	5	4	0	3	0	29	9	1	3	1	2	0	0	0	0	0	13
797	3	0	0	0	0	0	1	31	25	11	14	6	0	0	0	0	2	2
798	17	0	0	0	4	4	45	21	2	30	0	0	76	0	0	1	0	0
799	1	6	4	0	40	2	3	13	19	0	0	1	0	0	0	2	0	1
800	2	5	50	5	34	5	2	4	2	0	0	0	0	0	0	2	0	0
801	5	51	11	11	12	16	9	30	10	1	10	8	1	0	13	0	8	3
802	0	0	0	0	0	1	7	3	0	0	0	18	3	0	0	0	0	0
803	0	0	1	5	0	0	11	8	15	2	4	3	0	0	4	0	0	0
804	25	10	2	3	1	10	23	13	12	10	1	9	0	1	1	22	0	1
805	15	8	7	4	8	0	47	17	10	9	7	13	5	27	45	6	29	0
806	0	0	0	0	0	1	42	0	0	0	0	0	0	0	0	0	0	0
807	0	0	0	3	5	0	25	20	3	11	0	13	0	0	0	18	0	0
808	0	0	0	0	0	0	1	0	0	4	1	0	0	0	0	2	1	0
809	0	0	0	0	0	0	35	0	0	0	0	0	0	0	0	0	0	0
810	16	50	30	3	21	13	14	29	14	60	21	22	2	1	1	27	5	3
811	0	0	0	0	0	0	8	0	0	0	0	0	0	0	0	0	0	0
812	3	11	18	11	30	2	3	4	12	0	27	15	13	42	24	12	29	3
813	5	9	1	1	19	20	3	1	8	14	0	1	4	7	5	9	5	1
814	1	5	5	0	32	0	6	4	22	9	0	9	0	1	21	0	0	7
815	2	10	17	9	0	0	2	8	14	17	1	15	3	0	10	0	2	3
816	150	93	43	69	92	77	68	87	56	106	88	56	119	73	66	138	114	120
817	0	0	0	0	0	0	10	0	0	0	0	0	3	0	0	0	0	0
818	62	44	22	17	0	56	59	37	35	172	118	50	101	62	30	34	55	52
819	0	0	0	0	0	0	12	0	0	0	0	0	0	0	1	0	0	0
820	0	0	0	0	1000	0	1	0	2	0	0	0	0	0	10	0	3	0
821	0	0	0	0	0	0	25	0	0	0	0	0	0	0	0	0	0	0
822	0	10	4	0	4	0	8	2	0	0	7	0	6	0	12	0	0	0
823	10	17	6	19	13	14	37	32	72	23	53	26	67	24	45	26	43	109
824	0	2	0	1	0	17	58	0	0	0	0	0	0	0	0	0	0	0
825	0	0	0	0	71	31	35	20	25	0	0	0	1	0	0	1	0	48
826	34	4	18	24	68	28	56	10	1	19	1	4	0	7	1	16	0	8
827	7	22	1	18	8	19	6	5	5	0	17	0	37	2	36	7	3	2
828	0	0	11	3	6	4	18	0	6	1	0	1	1	1	2	0	17	5
829	0	7	2	0	0	1	8	0	0	0	0	0	0	0	0	0	0	0
830	13	21	6	5	15	10	26	18	57	10	2	8	22	10	30	18	1	0
831	0	15	23	40	45	3	3	14	15	71	71	50	947	214	313	189	433	57
832	0	0	7	0	0	0	3	13	0	12	0	0	0	0	0	0	0	0
833	4	20	49	15	7	28	27	20	21	2	0	14	0	2	0	20	10	7
834	0	0	2	7	4	0	2	4	0	6	0	0	0	1	1	3	2	1
835	8	44	24	8	16	35	9	1	0	19	42	33	20	28	40	4	23	22
836	6	0	0	0	0	0	9	0	0	0	0	0	0	0	0	0	0	0
837	0	0	0	2	0	4	5	0	0	0	0	0	0	0	0	0	17	1
838	8	16	5	2	0	10	7	18	31	30	3	40	13	1	6	32	30	150
839	13	12	4	3	3	0	7	2	0	0	3	1	0	2	0	0	4	1
840	0	8	5	1	0	1	10	2	1	0	0	0	1	0	0	0	0	0
841	0	5	5	0	0	0	3	0	0	0	0	0	0	0	0	2	0	0
842	0	0	1	1	0	0	6	4	3	0	0	0	0	0	0	0	1	0
843	0	0	0	0	0	1	7	6	3	0	3	0	10	0	0	0	0	0
844	0	0	0	0	0	0	13	0	0	0	0	0	0	0	0	0	0	0
845	0	0	0	0	0	0	14	0	0	0	3	0	0	0	0	0	0	0
846	0	51	46	0	0	0	32	0	17	59	0	0	0	45	0	71	0	0
847	52	37	18	7	16	7	52	24	11	116	8	37	55	8	34	24	35	10
848	1	2	2	1	1	11	11	5	10	0	7	14	7	0	0	4	21	3
849	0	0	5	0	1	0	9	0	0	0	0	1	0	0	0	1	8	1
850	8	45	21	4	5	47	59	51	35	81	6	20	1	0	1	4	23	5
851	1	0	4	0	1	12	27	0	0	43	33	44	3	0	60	3	0	41
852	0	5	75	22	26	32	27	67	40	121	7	43	0	0	12	16	33	0
853	0	0	0	0	0	0	7	0	0	0	0	0	0	0	0	0	0	0
854	0	0	2	0	0	1	21	0	0	0	2	0	1	0	0	0	29	0
855	0	0	0	2	0	15	5	0	0	0	0	0	0	0	0	0	0	0
856	148	141	152	345	367	362	336	219	267	145	141	176	260	306	84	154	63	151
857	0	9	6	0	2	1	10	7	7	2	0	1	0	1	0	0	10	0
858	61	99	134	61	130	71	33	111	123	53	42	92	77	74	24	49	74	134
859	15	4	8	41	56	52	13	19	40	37	53	147	156	66	57	40	25	105
860	3	14	60	1	13	5	12	7	15	53	4	10	0	6	0	4	14	6
861	1	0	5	0	2	8	7	17	12	6	5	1	1	1	1	9	1	4
862	0	0	0	0	0	0	21	3	1	0	0	0	0	0	0	0	0	0
863	0	0	0	0	0	0	6	0	0	0	0	0	0	0	0	0	0	0
864	0	0	0	0	0	0	14	0	0	0	3	0	0	0	0	0	0	0
865	17	8	39	53	72	64	14	17	152	64	99	229	199	83	167	52	655	707
866	0	0	0	0	0	0	10	0	2	0	0	0	0	1	0	0	0	0
867	25	11	12	20	9	4	11	21	0	8	1	11	0	1	0	0	1	0
868	0	0	18	0	41	0	17	0	0	0	0	0	0	0	0	0	0	0
869	0	11	0	0	15	11	3	1	4	0	2	0	0	17	12	0	6	0
870	0	0	0	1	23	0	25	29	0	8	16	10	0	0	4	0	7	2
871	0	19	0	0	8	6	3	5	17	1	12	4	4	0	3	0	2	0
872	123	216	136	63	64	80	109	111	116	114	85	90	93	135	98	67	145	195
873	9	5	10	0	8	10	17	6	10	25	17	22	1	1	7	3	0	4
874	0	8	9	0	0	1	4	0	0	0	1	6	0	0	23	1	1	0
875	0	0	0	0	22	0	19	0	0	0	52	0	0	58	0	0	0	0
876	0	0	6	2	0	0	12	0	18	0	0	4	0	0	0	0	1	0
877	2	0	26	6	1	2	14	3	1	11	9	9	14	1	0	1	38	6
878	0	0	0	0	0	0	13	0	0	0	0	0	0	0	0	0	0	0
879	11	3	21	10	21	8	20	31	7	2	10	4	0	0	14	0	0	0
880	17	28	23	21	0	550	31	0	0	0	0	23	0	69	61	35	0	0
881	0	0	0	27	0	13	60	0	0	1	22	0	0	0	81	0	0	0
882	0	1	0	0	0	0	11	9	4	0	9	0	0	2	0	0	0	0
883	6	35	3	145	21	1	61	60	11	7	16	7	24	3	33	21	2	4
884	0	0	0	1	0	3	4	1	0	0	0	0	19	0	2	0	0	0
885	11	1	6	6	3	9	8	17	24	5	5	1	6	0	0	0	1	0
886	1	18	3	2	6	26	17	75	3	5	2	24	1	10	0	5	4	0
887	37	39	41	107	59	44	38	21	31	369	249	303	553	264	187	153	257	412
888	0	0	0	0	0	42	1	23	3	0	19	1	0	0	1	0	31	0
889	27	30	9	15	22	8	11	6	12	44	4	27	3	5	2	0	5	0
890	0	1	0	14	3	2	17	8	17	2	20	1	0	0	0	3	11	0
891	0	0	0	0	0	0	5	2	15	0	0	0	0	0	0	0	0	0
892	0	6	0	0	14	0	24	2	0	0	3	5	0	0	0	1	6	48
893	25	22	45	14	15	71	26	59	17	23	12	16	29	2	18	1	11	1
894	3	15	23	3	11	9	11	7	38	25	10	22	9	2	23	3	18	2
895	10	5	0	1	8	6	11	56	6	1	16	0	0	5	0	18	0	18
896	0	0	0	0	0	9	29	0	0	0	0	0	0	0	0	0	0	0
897	0	1	0	0	0	0	4	5	4	0	0	0	0	0	0	0	0	0
898	0	0	0	1	3	0	10	2	0	0	0	0	0	0	0	0	0	0
899	0	0	0	0	0	0	11	22	0	0	6	0	102	2	0	4	0	0
900	16	0	2	0	8	2	4	0	0	0	0	13	0	3	0	0	0	0
901	44	43	23	2	32	12	56	51	78	14	35	41	21	10	1	22	37	103
902	14	9	0	8	0	7	17	20	20	33	27	18	20	21	0	7	6	1
903	0	0	0	0	3	1	15	2	0	0	0	9	0	0	0	0	4	0
904	0	0	0	0	0	1	9	0	0	0	0	0	0	0	0	0	0	0
905	7	7	34	21	18	17	4	22	46	3	14	20	21	47	20	6	10	0
906	26	87	65	14	23	19	193	61	88	17	50	34	0	5	2	30	38	45
907	0	0	6	0	0	0	2	1	4	1	0	1	0	0	0	0	2	0
908	0	10	6	25	1	4	10	0	0	0	0	0	11	0	3	2	0	0
909	0	0	0	0	0	0	24	0	0	0	0	0	0	0	0	0	0	0
910	8	26	24	11	43	7	64	13	51	15	47	22	8	0	10	26	9	241
911	12	43	35	22	34	74	87	40	41	51	11	64	37	30	11	1	68	11
912	6	0	5	0	0	0	4	0	0	0	3	1	0	0	0	0	0	0
913	8	6	14	16	10	0	11	21	13	8	0	2	0	0	0	28	0	0
914	0	69	20	99	0	258	4	25	0	0	0	0	0	45	40	1	0	1
915	19	42	26	12	21	11	44	51	116	52	37	42	13	16	3	18	32	46
916	0	0	0	0	0	0	8	0	11	0	0	0	0	0	0	0	0	0
917	0	0	2	1	7	3	15	5	1	0	0	0	0	0	0	2	0	0
918	0	0	6	0	0	0	10	11	12	2	1	3	0	0	0	0	14	2
919	0	2	1	2	10	14	3	0	0	0	0	1	0	0	0	12	0	0
920	84	57	41	46	43	25	16	51	82	31	50	14	48	35	35	52	57	49
921	9	0	0	4	4	2	10	0	6	0	3	3	13	0	3	8	5	1
922	0	0	0	49	0	0	9	0	0	0	0	0	0	0	0	0	0	0
923	0	17	13	18	10	61	9	38	60	0	1	19	22	17	53	9	14	8
924	231	124	130	22	21	25	19	8	10	0	0	5	0	0	0	0	19	37
925	16	0	0	24	0	152	25	0	13	0	0	0	0	0	0	0	0	0
926	0	1	0	0	0	0	4	0	4	0	0	0	0	0	0	0	0	0
927	12	29	9	6	32	18	30	18	43	22	6	5	24	6	24	36	9	6
928	1	9	3	12	2	0	14	15	16	4	4	0	0	0	0	5	1	11
929	0	0	0	0	0	0	12	26	1	0	0	0	0	0	0	0	0	0
930	15	5	3	1	0	0	6	3	1	0	1	13	15	0	0	0	4	0
931	0	0	0	0	2	0	14	2	0	0	0	0	4	0	0	10	0	0
932	39	51	41	64	98	50	59	62	59	245	135	232	598	231	397	127	309	333
933	0	0	0	0	0	0	3	0	0	0	0	0	0	0	0	0	0	0
934	0	1	11	0	0	0	6	0	0	0	4	2	0	0	0	0	0	0
935	8	2	14	7	10	4	12	13	2	0	57	14	15	0	6	30	7	0
936	86	17	6	22	59	21	90	139	86	0	4	4	51	7	116	16	13	16
937	0	3	0	2	46	0	23	1	1	0	0	0	0	51	0	0	1	62
938	0	5	6	0	5	12	24	20	4	1	6	6	4	2	1	1	14	0
939	11	0	0	1	6	11	12	0	1	16	6	5	0	0	1	4	0	1
940	3	26	32	11	43	25	28	7	9	0	2	0	6	8	7	56	10	1
941	0	0	0	0	0	16	26	0	0	0	0	0	0	0	0	0	0	0
942	0	7	0	1	4	1	6	9	0	4	0	10	0	0	0	0	3	0
943	0	0	1	7	6	3	11	25	3	27	0	2	0	0	8	0	2	5
944	26	7	48	1	8	6	12	12	3	9	102	34	112	551	159	75	32	174
945	269	184	241	159	227	169	137	185	106	262	173	215	240	350	276	258	178	154
946	95	32	41	19	95	19	22	79	24	81	64	126	107	295	153	209	96	111
947	69	94	25	16	26	44	16	21	2	1	14	0	0	8	2	3	4	0
948	4	7	6	4	5	4	18	11	2	0	1	2	1	0	28	0	3	4
949	7	19	6	7	51	8	5	3	11	30	5	10	20	7	15	15	12	13
950	0	3	0	0	0	1	3	1	13	3	0	0	0	0	0	0	9	0
951	0	0	4	3	2	4	9	2	9	3	7	5	0	0	5	16	31	1
952	5	19	0	6	0	2	22	6	7	0	2	0	0	0	0	2	0	2
953	2	0	1	15	0	7	30	0	0	0	0	3	2	2	1	1	0	1
954	0	0	0	0	0	0	1	0	0	0	0	0	8	0	0	0	0	0
955	0	0	0	0	0	0	18	1	2	0	0	0	0	0	0	0	0	0
956	24	0	1	1	0	0	31	1	19	104	53	0	4	73	1	51	0	570
957	8	26	17	0	26	5	8	1	0	1	0	6	0	0	0	0	1	0
958	0	1	0	0	0	0	6	11	46	0	0	16	0	0	4	0	0	1
959	0	0	0	0	0	0	7	0	0	0	0	0	0	0	0	0	0	0
960	10	1	1	0	0	0	6	0	0	1	0	2	0	0	6	0	0	0
961	26	46	9	8	14	24	37	20	75	3	2	13	0	0	0	13	2	68
962	104	118	76	6	44	50	46	51	54	79	73	10	33	19	17	47	4	37
963	5	4	17	17	4	4	11	58	1	48	24	13	12	31	35	49	33	33
964	2	13	22	3	11	2	1	3	2	5	0	0	0	0	0	0	0	1
965	19	6	1	6	13	9	5	4	9	10	13	11	2	1	8	8	4	0
966	22	26	52	38	51	15	28	49	78	272	125	87	54	88	54	26	58	109
967	3	15	10	24	10	13	7	91	43	5	7	11	4	0	0	11	2	1
968	0	0	0	1	1	0	5	5	5	0	0	0	0	0	0	0	0	0
969	0	19	21	4	23	1	9	3	3	30	1	4	0	0	1	1	0	3
970	0	0	0	0	0	0	12	0	0	0	0	0	0	0	0	0	0	0
971	5	6	14	4	8	10	25	3	9	13	7	6	0	1	0	17	19	0
972	0	0	0	0	0	0	6	0	0	0	0	0	0	0	0	0	0	0
973	0	0	0	0	0	0	20	0	0	0	0	0	0	0	0	0	0	0
974	0	0	16	0	0	0	17	1	0	0	0	0	0	0	0	0	0	0
975	0	0	0	0	0	0	14	11	0	0	0	0	0	0	0	0	0	2
976	8	0	0	0	0	0	1	9	2	0	0	0	0	0	1	0	0	0
977	15	0	2	123	217	22	8	12	10	0	3	1	14	8	13	25	65	8
978	0	0	0	0	0	0	10	3	0	0	0	0	0	0	0	0	0	0
979	3	4	15	2	10	14	33	33	42	15	20	11	3	6	5	1	3	3
980	0	1	0	0	0	0	14	0	0	0	5	1	0	0	0	1	0	0
981	0	2	0	0	0	13	2	0	0	0	2	1	0	0	0	0	4	0
982	0	0	0	0	0	0	11	0	0	0	0	0	0	0	0	0	5	0
983	16	6	11	0	0	9	6	22	12	5	11	2	0	0	0	0	0	0
984	56	30	67	63	101	104	59	21	21	4	64	82	61	125	153	103	56	14
985	0	3	4	0	0	5	5	1	0	0	0	0	0	2	3	0	0	10
986	0	0	0	0	0	0	24	1	28	1	0	4	2	2	0	0	0	0
987	0	9	16	3	7	3	27	84	8	0	2	35	8	0	0	55	7	0
988	0	0	0	0	0	0	11	0	0	0	0	0	0	0	0	0	0	0
989	0	26	1	0	1	0	19	32	1	39	1	1	0	2	2	2	1	9
990	117	70	82	16	41	32	20	94	32	42	19	100	36	51	4	5	53	11
991	23	13	21	1	33	1	11	10	17	27	1	5	2	0	0	2	0	15
992	0	10	9	10	1	1	19	28	36	18	68	48	47	27	19	60	53	39
993	0	0	0	0	0	0	1	3	1	0	4	0	1	0	0	0	0	0
994	5	9	0	4	1	3	13	14	15	51	7	1	1	0	6	3	7	1
995	38	45	40	1	8	0	10	1	34	0	25	2	30	0	4	0	0	17
996	12	24	8	7	24	34	22	64	62	33	24	24	34	59	43	10	32	6
997	0	0	0	0	0	0	12	0	0	0	0	0	0	0	0	0	0	0
998	32	72	60	13	25	4	33	44	24	75	21	49	17	3	7	27	76	37
999	0	37	4	0	6	3	65	25	1	4	1	3	111	86	2	3	45	146
1000	0	1	2	0	0	0	7	0	8	0	0	0	0	0	0	0	0	0
1001	3	15	2	0	1	1	16	3	13	0	1	0	1	2	1	26	1	52
1002	0	0	0	0	3	0	3	1	0	0	0	0	0	0	0	0	0	0
1003	0	0	15	32	13	50	7	14	19	0	7	4	0	5	9	19	8	3
1004	0	0	0	0	1	2	10	7	0	0	0	0	0	0	0	9	0	0
1005	8	16	41	0	1	4	12	0	6	0	0	1	0	1	8	0	0	0
1006	0	0	0	2	0	0	18	0	0	0	0	0	0	0	0	0	0	0
1007	0	0	0	0	0	0	13	0	0	0	0	0	0	0	0	0	0	0
1008	6	3	17	3	10	15	22	26	40	4	14	18	3	1	3	135	0	4
1009	0	9	11	3	0	1	9	0	2	0	0	0	0	0	0	0	0	0
1010	2	4	2	12	7	4	6	2	0	0	1	0	9	0	1	4	0	0
1011	0	0	0	0	0	0	24	0	0	0	0	0	0	0	0	0	0	0
1012	1	0	53	0	0	0	34	22	22	4	45	21	0	182	1	46	28	163
1013	7	0	6	12	12	8	29	8	6	23	9	10	1	13	40	33	5	1
1014	20	34	59	27	38	24	23	35	25	38	14	5	0	0	16	15	17	40
1015	52	22	21	9	37	15	33	29	14	32	17	12	32	4	7	62	4	11
1016	13	5	1	3	2	0	1	2	8	49	8	6	0	6	4	1	6	2
1017	0	0	7	0	0	0	15	0	0	0	0	0	0	0	0	0	0	0
1018	2	5	0	0	0	0	7	4	1	11	0	0	0	0	0	0	0	4
1019	3	47	32	8	10	11	10	3	44	59	2	4	18	8	4	0	0	4
1020	0	3	4	37	0	21	17	2	130	0	0	1	1	1	2	20	10	0
1021	0	0	0	0	0	0	19	0	0	0	0	0	0	0	0	0	0	0
1022	0	10	4	2	6	5	26	11	14	0	0	8	5	1	4	0	0	8
1023	5	20	21	1	19	16	6	20	26	46	10	21	12	6	0	9	12	54
1024	2	13	1	0	1	6	38	12	2	15	14	0	0	0	0	18	4	4
1025	30	24	31	13	16	10	12	43	3	7	12	10	23	25	36	30	34	35
1026	0	0	0	0	0	0	14	0	0	0	9	0	2	0	0	0	0	0
1027	0	1	0	4	0	0	7	0	0	0	0	0	0	0	0	0	0	0
1028	10	6	9	2	0	3	3	5	4	9	6	5	3	0	5	12	13	62
1029	0	0	0	0	0	0	15	2	0	0	0	2	0	0	0	0	0	0
1030	0	0	0	1	0	0	16	0	0	0	0	1	0	0	0	0	0	1
1031	0	0	0	0	0	0	15	0	0	0	0	0	0	0	0	0	0	0
1032	0	0	0	2	9	0	9	2	8	0	0	2	0	0	1	1	5	11
1033	0	7	8	4	0	0	39	19	3	0	3	13	0	0	0	1	1	0
1034	0	0	0	0	0	0	4	0	0	0	0	0	0	0	0	0	0	0
1035	6	4	3	1	7	0	3	4	6	8	1	8	3	2	7	0	0	0
1036	30	21	24	6	52	3	2	0	11	6	4	45	31	19	7	0	0	0
1037	15	1	1	0	2	0	12	0	3	0	0	0	0	0	0	0	0	0
1038	37	41	12	12	20	5	28	6	10	0	7	6	19	2	7	1	4	3
1039	27	12	34	10	52	35	49	37	19	10	25	3	10	7	32	1	17	3
1040	0	7	13	5	0	1	29	33	13	1	22	0	0	0	0	0	3	8
1041	0	1	0	3	2	6	9	0	0	4	0	10	0	0	13	2	3	6
1042	18	16	28	17	348	36	24	34	14	22	30	29	30	41	37	2	20	26
1043	0	3	23	3	5	20	29	23	28	4	20	8	0	0	0	9	10	12
1044	0	1	1	0	0	0	3	18	1	0	0	0	0	0	0	0	0	0
1045	13	0	0	0	0	0	2	2	9	0	6	0	0	0	0	0	2	0
1046	0	23	56	14	0	137	35	0	94	1	25	0	70	1	30	162	0	58
1047	3	0	13	0	0	0	6	0	0	0	0	0	0	0	0	0	0	0
1048	56	208	79	44	38	20	82	57	97	34	43	17	2	10	4	59	69	28
1049	8	23	37	0	6	10	13	4	28	7	9	22	3	0	1	7	18	0
1050	418	365	258	97	203	175	81	268	220	195	113	159	118	116	55	265	197	78
1051	0	0	0	0	0	0	3	0	0	0	0	0	0	0	0	1	0	0
1052	1	0	0	0	0	0	2	6	0	0	0	4	0	0	0	0	0	0
1053	6	11	8	3	4	4	14	4	5	13	1	3	0	1	0	0	0	6
1054	0	10	1	0	0	0	14	0	0	3	2	0	0	0	0	12	0	51
1055	0	1	2	0	4	0	22	5	2	0	5	1	10	3	24	0	6	6
1056	8	22	0	0	0	5	4	0	3	5	2	4	0	0	0	12	3	1
1057	30	41	37	7	108	10	89	47	136	55	11	37	30	10	99	25	33	17
1058	22	21	32	13	56	89	47	42	51	31	78	129	143	271	244	110	78	27
1059	19	20	7	20	45	68	32	99	70	7	5	28	8	26	34	26	20	9
1060	20	16	15	6	19	4	48	68	17	0	5	8	8	3	4	0	1	4
1061	0	0	4	0	0	0	12	0	0	0	0	0	0	0	0	0	0	0
1062	1	2	0	0	2	5	7	1	5	5	7	1	0	0	0	0	1	3
1063	1	15	4	2	40	3	16	6	15	2	11	13	5	2	4	28	5	12
1064	44	35	13	21	21	9	16	23	44	8	29	36	3	0	3	21	1	4
1065	0	0	3	11	10	0	2	0	8	0	5	2	0	0	0	4	2	8
1066	0	0	0	1	8	14	2	0	2	0	1	0	0	0	2	0	0	0
1067	0	1	0	5	1	2	15	2	0	0	22	30	11	18	5	16	11	0
1068	0	0	17	0	0	1	12	0	1	4	0	0	0	1	0	0	0	0
1069	54	90	41	81	47	47	69	85	135	153	47	59	48	34	24	58	56	24
1070	14	1	18	3	0	1	19	9	6	3	4	1	5	12	5	0	1	0
1071	1	5	12	0	5	20	22	6	12	12	0	2	0	0	0	7	0	11
1072	1	7	3	2	9	0	22	3	3	3	14	1	0	0	0	0	0	1
1073	0	0	6	0	2	8	9	1	6	0	1	2	0	0	0	0	0	2
1074	0	2	2	10	0	0	13	4	3	0	1	1	0	0	0	0	0	0
1075	11	20	3	1	2	3	5	3	5	11	1	4	0	0	0	27	0	0
1076	0	0	0	0	0	0	2	0	0	0	0	0	0	0	0	0	0	0
1077	0	2	1	0	0	0	7	20	4	0	0	0	0	0	0	0	0	2
1078	0	0	0	2	0	3	14	2	60	3	0	0	0	0	0	0	7	0
1079	0	3	0	5	1	0	16	3	11	23	2	16	17	7	3	0	0	0
1080	0	0	0	0	0	0	25	0	0	0	0	0	0	0	0	0	0	0
1081	11	58	18	2	30	6	20	27	46	20	16	39	3	0	0	8	52	2
1082	0	1	22	0	0	0	4	6	0	0	0	0	0	0	0	0	0	0
1083	12	3	0	14	68	19	11	6	17	0	1	4	2	0	0	10	103	87
1084	38	5	15	12	20	1	13	5	12	1	4	1	11	7	5	29	4	0
1085	4	0	3	0	3	0	9	5	9	0	6	18	0	0	3	0	0	0
1086	24	56	52	6	17	22	51	16	5	17	16	10	18	3	3	18	5	66
1087	8	5	0	0	0	18	18	13	9	0	22	1	5	1	0	1	11	7
1088	6	35	20	2	63	17	8	2	9	0	18	5	3	8	23	7	30	15
1089	7	29	17	38	31	30	29	37	26	16	4	20	3	1	0	18	15	63
1090	19	32	72	13	16	5	43	10	24	18	3	8	1	3	1	10	11	13
1091	20	0	0	0	0	0	8	0	0	0	0	0	0	0	0	0	1	0
1092	0	8	0	0	0	0	21	3	0	0	0	13	0	5	0	13	0	0
1093	18	18	41	9	22	21	17	114	92	7	27	10	13	10	17	4	5	1
1094	0	0	0	2	0	1	22	2	1	0	1	5	0	0	0	1	0	0
1095	1	21	13	1	32	3	42	8	18	18	1	1	2	0	6	1	3	18
1096	30	40	20	48	82	95	52	28	31	3	38	23	67	26	30	45	34	8
1097	5	11	9	14	46	21	14	13	12	26	28	22	34	17	59	1	24	12
1098	0	0	0	0	0	6	1	0	0	3	6	4	13	9	29	8	0	9
1099	0	1	0	1	10	8	21	4	2	0	0	0	0	0	0	1	0	0
1100	0	9	3	2	3	4	15	0	4	0	2	7	2	0	1	0	0	2
1101	0	1	6	0	5	0	12	0	6	2	0	0	0	0	0	3	0	5
1102	0	0	0	1	0	0	2	7	0	0	3	0	0	0	0	0	0	0
1103	0	15	4	2	22	2	28	2	5	0	10	11	0	3	0	0	0	1
1104	8	19	9	24	28	43	44	2	22	4	18	60	47	60	95	54	41	5
1105	128	110	152	62	79	43	24	78	65	44	107	82	77	50	79	70	74	13
1106	8	7	9	0	16	3	17	6	13	4	4	1	6	3	6	1	17	0
1107	0	0	0	1	0	2	3	2	9	7	21	24	33	5	33	1	3	1
1108	0	0	0	0	0	0	3	0	0	0	0	0	2	0	0	0	0	0
1109	0	17	0	17	41	29	12	11	3	0	0	0	92	14	2	0	0	9
1110	66	29	40	11	21	13	15	0	8	3	14	18	10	72	31	2	7	0
1111	1	0	0	228	0	0	25	0	0	0	38	0	0	2	0	0	0	0
1112	0	6	0	1	0	0	4	11	5	52	2	0	0	0	0	0	0	12
1113	0	0	0	0	0	0	5	0	0	0	0	0	0	0	0	0	0	0
1114	63	75	56	86	74	84	159	119	242	128	236	120	97	27	79	373	94	223
1115	0	0	2	0	5	2	3	0	11	0	0	0	2	0	0	1	0	2
1116	1	7	22	0	0	0	5	1	1	0	2	0	0	0	0	0	0	0
1117	0	0	0	0	0	0	33	0	0	0	0	0	0	0	0	0	0	0
1118	1	10	5	0	2	3	6	1	0	8	5	3	2	0	1	1	2	13
1119	8	30	47	31	27	24	49	25	87	11	62	19	14	3	10	12	31	12
1120	11	15	26	13	2	8	6	20	10	22	3	5	0	2	2	1	24	1
1121	0	0	0	0	0	0	13	0	0	0	0	0	1	0	0	0	2	0
1122	30	0	0	0	6	3	9	13	0	9	6	5	2	0	0	7	1	5
1123	0	0	1	1	7	10	8	6	2	6	8	8	1	0	0	0	5	0
1124	0	0	0	0	2	0	27	8	8	4	0	1	0	0	0	11	0	0
1125	0	0	4	0	6	0	4	1	1	0	0	0	0	0	0	0	3	0
1126	19	47	21	5	47	14	41	57	35	25	15	48	9	0	21	25	44	47
1127	0	1	0	0	0	2	20	5	1	0	9	0	0	16	0	27	3	0
1128	0	0	0	0	0	0	5	0	0	0	0	0	0	0	0	0	0	0
1129	13	7	2	15	34	23	8	1	8	2	29	15	0	2	4	2	5	2
1130	0	0	0	0	0	0	5	6	0	0	0	0	0	0	0	0	0	0
1131	0	0	0	0	0	0	37	0	0	0	0	0	0	0	0	0	0	0
1132	0	18	7	2	7	2	3	4	11	0	11	10	1	0	0	0	0	0
1133	0	21	47	0	0	128	21	0	0	28	1	0	0	0	64	32	0	32
1134	0	0	0	0	0	0	11	0	0	0	0	0	0	0	0	0	0	0
1135	32	12	18	26	65	14	14	17	53	339	51	300	93	66	101	83	71	80
1136	0	1	0	6	0	0	13	0	2	0	0	0	0	0	0	0	0	0
1137	0	1	0	0	0	0	29	0	0	0	0	0	3	0	0	0	0	0
1138	9	21	8	15	7	8	7	9	34	1	0	6	2	6	49	0	8	0
1139	1	1	20	0	0	5	9	17	10	1	1	0	0	0	2	5	2	0
1140	114	65	56	116	102	44	89	108	76	156	53	207	84	67	34	44	135	54
1141	0	0	4	1	1	0	2	20	0	0	0	0	0	0	3	0	0	0
1142	0	1	0	1	2	0	4	5	0	0	0	4	0	0	0	4	0	2
1143	1	0	0	0	0	0	3	0	7	4	4	0	4	21	0	0	3	0
1144	0	0	0	0	0	0	6	0	2	0	0	0	0	0	0	0	0	0
1145	1	5	9	18	1	7	6	28	1	21	13	8	8	0	2	2	8	0
1146	1	2	5	4	6	12	2	10	3	8	0	0	0	1	0	1	0	0
1147	9	28	15	2	10	0	25	2	37	0	18	3	2	3	1	0	8	0
1148	0	4	2	6	4	7	18	13	5	0	4	0	0	0	0	0	6	0
1149	55	58	38	29	27	66	11	45	22	18	11	17	18	5	33	20	16	0
1150	24	3	10	9	27	33	9	17	36	11	4	11	9	23	2	0	22	7
1151	25	7	0	2	3	9	12	2	4	15	0	16	37	7	10	5	2	3
1152	35	18	17	15	1	14	20	6	7	16	5	6	6	16	12	16	39	1
1153	110	131	170	15	45	68	26	58	45	42	31	50	129	44	16	87	11	17
1154	0	0	1	3	2	0	9	7	2	23	5	7	0	0	2	0	26	0
1155	0	1	2	0	0	0	6	0	24	0	1	0	0	0	0	0	2	2
1156	0	0	0	0	6	0	7	1	3	0	0	0	0	0	0	0	0	0
1157	0	3	28	25	13	5	9	9	24	14	6	9	0	5	0	1	63	0
1158	0	0	0	0	2	2	3	0	11	0	0	0	0	0	0	0	0	0
1159	23	5	0	15	5	1	8	14	1	23	13	8	4	11	6	1	12	4
1160	1	9	1	5	79	5	50	11	180	6	23	23	50	30	2	9	31	12
1161	4	12	0	0	0	0	5	0	3	0	0	0	0	0	0	0	0	0
1162	0	0	2	0	0	4	16	1	2	0	0	0	0	0	0	0	0	0
1163	0	0	0	0	0	0	8	1	1	0	0	0	0	0	0	0	0	0
1164	43	14	17	0	6	0	2	0	0	0	0	0	0	0	1	19	0	0
1165	0	0	0	0	0	0	6	6	0	1	0	0	0	0	0	0	0	0
1166	384	169	550	203	231	128	57	361	108	129	115	208	127	196	85	262	25	69
1167	35	125	87	27	36	21	105	60	67	102	15	63	33	39	15	35	87	19
1168	0	6	10	0	0	0	14	0	0	0	0	1	0	0	0	0	0	0
1169	0	0	0	20	0	0	2	0	0	0	0	0	1	0	0	1	0	0
1170	16	35	59	3	8	10	22	0	5	23	1	4	0	0	0	0	7	11
1171	0	2	0	0	0	0	10	2	0	0	3	0	0	5	6	0	0	1
1172	18	15	3	4	11	19	24	26	50	9	2	5	15	15	5	5	0	81
1173	0	0	0	0	0	0	23	0	0	19	0	0	0	0	0	0	0	0
1174	3	3	20	8	4	6	31	18	37	10	43	20	0	1	1	7	37	3
1175	2	1	2	5	16	3	21	80	44	22	29	20	15	23	40	25	2	10
1176	0	0	0	0	0	0	9	0	0	0	0	0	0	0	0	0	10	0
1177	16	40	23	26	65	26	15	19	4	327	66	149	48	50	73	58	73	82
1178	12	0	2	2	2	8	2	2	1	0	0	0	0	0	0	0	0	0
1179	7	2	4	2	18	15	11	30	4	13	6	8	10	36	35	31	4	0
1180	0	0	2	0	0	0	16	0	0	0	0	1	1	0	0	13	1	0
1181	0	0	8	0	0	0	11	0	0	0	1	0	0	0	0	0	0	38
1182	0	0	0	0	0	1	9	0	0	0	0	2	3	0	0	0	0	0
1183	3	8	9	0	9	7	6	12	2	4	5	2	11	1	7	1	6	2
1184	12	25	9	2	1	1	27	8	6	8	9	6	3	0	0	20	17	0
1185	131	210	137	31	87	57	72	126	133	32	38	46	25	35	29	88	49	18
1186	44	33	14	10	17	7	10	16	13	19	20	11	4	45	0	4	5	8
1187	0	11	3	28	32	5	13	4	0	5	6	1	2	41	21	7	3	20
1188	0	0	0	0	0	0	19	0	0	0	0	0	0	0	0	0	0	0
1189	0	0	0	0	0	0	12	0	0	0	0	0	0	0	0	0	0	0
1190	0	0	0	0	0	0	6	0	0	0	0	0	0	0	0	0	0	0
1191	7	1	17	21	14	2	10	2	17	0	0	0	12	3	0	0	0	3
1192	8	5	0	0	1	0	8	16	5	0	0	0	0	0	0	0	3	0
1193	3	15	17	6	35	14	21	3	0	8	6	1	0	0	11	5	0	15
1194	3	24	24	4	5	3	10	7	12	9	19	2	12	2	16	2	21	3
1195	0	1	4	2	19	0	31	1	2	1	4	1	0	0	0	24	0	1
1196	30	9	8	12	15	9	32	25	6	9	13	18	2	19	6	16	2	11
1197	28	57	100	49	58	33	302	93	90	54	70	32	45	38	18	35	50	85
1198	5	5	9	0	33	1	27	4	4	5	1	6	4	0	0	5	0	10
1199	0	0	5	1	0	0	9	0	0	0	0	0	0	0	0	0	0	0
1200	0	0	0	0	0	0	3	9	4	0	0	0	0	0	0	0	0	0
1201	0	0	0	0	2	0	10	0	4	1	9	5	17	0	8	1	4	3
1202	4	0	0	0	1	9	2	0	0	3	0	0	1	0	0	0	0	2
1203	1	10	9	2	21	13	24	1	11	3	0	7	1	0	0	5	0	131
1204	0	3	0	0	0	22	18	1	4	0	0	0	0	0	1	0	0	0
1205	1	0	0	0	6	1	2	0	0	0	2	0	0	0	0	0	8	0
1206	6	34	20	2	0	2	1	9	5	0	0	0	0	0	0	0	0	0
1207	132	148	125	25	32	61	45	105	102	51	32	41	56	39	44	37	127	29
1208	0	0	0	0	8	0	12	0	0	0	0	0	0	0	0	0	0	0
1209	0	0	0	0	0	0	6	0	0	0	0	1	0	0	0	0	0	0
1210	11	20	24	1	3	7	37	28	33	0	2	23	15	2	2	0	0	5
1211	0	44	3	2	3	0	17	11	8	0	3	0	0	0	0	0	0	0
1212	0	0	0	0	0	0	27	0	0	0	0	0	0	0	0	0	0	0
1213	0	2	8	0	8	2	4	0	0	0	0	0	0	0	0	11	1	14
1214	14	9	4	0	3	1	7	4	1	1	0	0	3	0	0	0	0	1
1215	3	37	30	9	16	10	18	11	28	20	5	13	9	2	5	18	50	9
1216	6	6	21	12	4	9	15	11	8	4	1	7	0	0	2	1	8	0
1217	0	0	0	3	4	15	19	0	47	1	7	6	0	5	0	5	2	12
1218	0	9	0	20	65	9	14	13	221	2	18	13	8	20	0	2	0	0
1219	0	7	0	0	4	9	8	1	10	0	1	0	0	0	0	0	4	0
1220	0	0	0	0	3	0	4	0	0	0	0	0	0	0	0	0	0	0
1221	11	14	12	6	17	5	14	5	4	24	3	8	4	1	21	8	0	4
1222	1	8	0	1	2	0	3	0	3	0	47	15	0	0	7	0	3	47
1223	1	0	3	0	0	0	10	0	3	15	2	1	4	0	0	0	0	0
1224	0	0	3	0	0	0	2	3	0	12	0	0	0	0	0	0	0	0
1225	5	23	5	2	1	3	8	4	2	0	0	10	0	0	0	0	3	0
1226	0	28	0	1	15	9	26	13	9	5	0	5	0	2	0	0	3	0
1227	0	2	0	0	17	6	17	0	2	1	11	0	0	0	0	1	0	44
1228	0	0	0	0	0	0	1	0	0	0	0	1	0	0	0	0	0	0
1229	3	2	4	8	11	6	1	17	0	5	17	23	11	9	9	1	18	18
1230	0	0	0	0	0	0	5	0	0	0	0	0	0	0	0	0	0	0
1231	144	130	126	39	69	62	105	110	113	44	42	90	12	25	38	63	43	18
1232	1	8	1	0	4	3	7	12	36	9	0	0	13	1	2	15	0	0
1233	8	0	12	0	0	11	11	2	1	15	2	4	2	7	0	0	0	4
1234	0	0	0	0	0	0	2	0	0	0	0	0	0	0	0	0	0	0
1235	13	3	18	2	12	5	18	1	5	2	2	3	9	1	9	0	0	0
1236	9	32	25	1	1	2	4	3	17	4	5	0	0	1	1	0	0	3
1237	2	13	27	12	17	18	38	32	9	11	23	8	9	4	27	10	8	0
1238	1	4	3	1	32	4	4	26	18	8	7	14	12	9	5	13	16	6
1239	28	34	17	18	13	16	21	39	56	41	0	29	0	12	10	0	7	0
1240	2	0	5	0	3	2	4	24	7	15	4	6	2	4	19	7	9	1
1241	0	0	0	0	0	0	37	18	0	84	0	0	0	0	0	0	0	64
1242	27	50	16	12	7	2	12	9	6	17	0	23	3	0	0	1	2	41
1243	0	3	9	6	1	19	11	17	13	4	0	11	2	0	8	1	102	8
1244	1	17	56	1	8	4	17	9	41	5	3	0	0	0	0	0	4	5
1245	103	58	26	55	27	163	24	112	79	19	15	45	4	115	57	24	21	3
1246	0	0	4	3	1	0	10	0	0	0	0	0	0	0	0	0	0	0
1247	9	1	2	8	10	4	14	2	5	0	1	3	7	20	23	6	1	13
1248	0	0	0	0	0	0	4	0	0	7	0	8	6	29	7	0	0	0
1249	0	48	19	0	0	5	13	0	4	0	0	0	0	0	0	11	12	1
1250	52	28	40	15	28	34	29	56	43	15	11	22	36	21	60	5	35	15
1251	11	22	8	5	6	4	11	13	25	20	13	8	11	0	7	57	11	9
1252	0	0	0	0	0	0	11	0	0	0	0	0	0	0	0	0	0	0
1253	0	0	0	0	0	0	8	0	0	7	0	0	0	0	1	0	0	0
1254	6	0	4	23	14	7	29	30	105	200	66	113	39	57	43	24	32	398
1255	0	5	2	6	2	14	10	11	34	2	2	1	19	21	0	22	1	1
1256	1	3	0	5	0	2	2	4	0	1	0	3	3	0	0	0	8	0
1257	49	30	70	9	39	104	13	7	20	1	22	30	22	19	19	6	19	28
1258	0	0	0	0	0	0	17	4	0	0	0	0	0	0	0	0	0	1
1259	1	23	34	12	20	14	23	22	45	23	3	10	0	0	0	1	5	27
1260	3	24	2	5	0	0	11	4	7	6	2	1	1	0	6	2	0	0
1261	0	0	0	0	0	0	11	0	2	0	0	0	9	9	15	4	1	4
1262	0	0	0	0	0	0	27	0	0	0	0	0	0	0	0	0	0	0
1263	1	6	7	18	7	1	3	2	0	0	2	0	0	0	0	0	1	7
1264	4	14	10	43	80	16	9	11	26	44	15	31	20	36	53	113	25	14
1265	2	1	0	0	0	3	1	0	0	0	0	4	0	0	0	1	0	4
1266	0	3	0	9	0	0	8	3	7	1	18	3	0	0	1	0	4	1
1267	0	3	11	1	26	10	16	14	5	48	0	3	0	3	0	0	1	13
1268	0	0	1	1	7	0	3	7	2	0	0	20	3	0	0	6	32	1
1269	0	0	0	0	0	0	8	10	9	0	2	0	0	0	0	0	0	0
1270	0	7	16	1	11	2	2	15	9	0	0	1	13	1	0	13	1	0
1271	0	5	0	0	0	7	12	1	2	1	2	16	36	1	0	0	2	85
1272	0	0	0	0	0	18	1	0	0	0	0	0	0	0	0	0	0	1
1273	0	0	0	0	20	1	45	0	0	0	0	0	0	0	0	0	0	0
1274	1	0	1	0	0	0	12	0	0	8	1	0	0	0	30	0	0	32
1275	2	0	0	0	0	2	1	1	0	0	0	0	0	1	0	0	0	1
1276	2	1	13	0	1	7	5	4	2	0	2	2	0	3	0	2	0	0
1277	0	0	0	0	0	0	12	0	0	0	0	0	0	0	0	5	0	0
1278	0	0	34	5	5	12	22	14	4	0	1	3	1	0	0	2	3	5
1279	3	12	0	4	5	18	20	19	30	5	19	22	2	0	2	1	5	0
1280	2	0	2	0	0	2	4	0	0	0	0	0	0	0	0	0	0	0
1281	2	37	5	0	0	11	10	6	4	0	0	0	0	0	0	0	0	0
1282	0	0	0	63	0	0	28	0	9	133	0	0	0	0	22	0	65	0
1283	56	14	16	1	5	0	4	3	0	0	0	1	0	0	1	0	0	1
1284	0	0	27	0	0	25	1	0	0	0	0	0	0	0	0	0	0	0
1285	0	1	3	2	4	0	13	0	1	0	20	2	0	0	0	0	0	0
1286	12	16	29	2	9	3	22	17	14	0	3	5	5	0	0	6	3	1
1287	0	0	8	0	0	3	2	0	0	0	0	0	0	0	0	9	0	0
1288	0	2	9	22	15	7	21	38	9	0	15	2	62	19	9	22	6	0
1289	16	18	9	12	34	20	61	34	58	28	33	20	8	28	11	25	12	15
1290	39	30	40	0	0	1	8	26	47	7	2	0	0	4	0	1	17	0
1291	0	0	0	0	0	0	9	0	0	0	0	0	0	0	0	0	0	0
1292	304	49	232	34	64	135	18	15	21	69	119	207	247	347	291	32	4	15
1293	1	0	0	7	10	1	3	4	1	0	0	0	0	9	0	0	0	0
1294	2	1	0	0	0	0	8	0	0	0	0	0	0	0	0	0	0	0
1295	30	52	29	11	3	8	1	32	30	1	1	4	6	5	2	3	2	1
1296	1	1	5	0	6	6	4	0	3	0	12	0	0	0	0	0	0	0
1297	2	1	0	0	1	0	2	0	0	0	0	0	0	0	0	0	2	4
1298	0	0	2	2	22	2	14	16	7	0	1	4	6	2	5	7	1	0
1299	0	0	0	0	0	0	24	0	0	0	0	0	0	0	0	0	0	0
1300	0	0	0	0	0	0	6	0	0	10	0	0	6	0	1	0	0	0
1301	0	2	5	0	1	0	8	0	0	0	0	2	0	0	0	0	1	0
1302	0	0	0	0	0	0	5	0	0	0	0	0	0	0	0	0	0	0
1303	3	0	0	0	0	4	5	1	5	0	0	0	0	0	0	1	9	0
1304	1	0	0	0	34	0	6	0	2	0	0	0	0	0	0	0	0	0
1305	17	1	14	0	0	1	2	0	0	0	14	0	0	0	0	0	0	0
1306	0	0	0	0	0	16	42	49	0	0	0	0	0	0	0	0	0	0
1307	0	17	3	3	18	30	15	1	14	2	3	1	120	27	4	1	1	2
1308	22	0	0	0	0	4	4	9	0	0	1	2	15	2	3	4	6	6
1309	0	0	0	0	0	0	1	0	0	1	1	0	0	0	0	0	0	3
1310	3	2	0	0	0	0	10	5	0	0	0	0	0	0	0	0	0	0
1311	20	6	8	0	2	10	22	7	0	11	40	2	17	14	34	5	26	2
1312	0	3	0	0	2	0	25	0	9	0	11	0	1	0	3	0	1	0
1313	3	23	4	0	5	7	11	14	3	2	0	24	0	1	0	0	1	23
1314	5	8	14	0	8	0	2	2	4	15	0	0	1	0	0	1	0	0
1315	0	2	0	0	2	0	1	12	0	0	0	0	0	0	0	0	0	3
1316	0	21	0	0	0	0	18	0	5	1	7	0	0	0	0	0	8	6
1317	1	13	0	0	1	10	5	1	10	0	1	0	11	3	0	0	0	9
1318	0	0	0	0	0	0	3	30	0	5	0	2	0	1	1	0	0	0
1319	0	0	14	1	3	2	16	5	0	0	0	1	0	0	0	0	8	0
1320	18	14	16	1	5	4	5	2	2	2	1	1	3	1	6	1	4	0
1321	0	18	0	3	0	0	4	0	0	0	0	0	0	0	0	0	0	0
1322	18	59	13	4	15	10	28	42	32	3	10	8	4	46	10	2	17	12
1323	0	0	1	14	3	4	6	7	4	0	0	0	0	0	2	2	10	0
1324	1	14	26	1	2	0	5	6	0	0	77	4	0	8	1	0	0	0
1325	0	0	0	0	0	6	2	0	0	0	0	0	2	0	0	0	0	0
1326	0	3	0	0	0	0	9	5	0	0	0	4	4	0	0	1	3	0
1327	6	29	2	0	0	1	7	4	8	0	0	1	0	5	0	0	0	1
1328	4	11	8	0	0	5	5	15	1	0	0	0	0	0	0	0	0	0
1329	0	0	0	0	0	0	1	0	0	6	0	0	0	0	0	0	0	0
1330	0	0	0	0	3	0	4	0	2	1	0	0	0	0	0	0	13	0
1331	2	0	4	0	1	0	4	0	0	1	0	0	0	0	0	0	0	0
1332	5	0	0	3	0	11	23	1	0	0	0	3	0	5	0	1	0	0
1333	0	0	0	0	0	0	4	0	0	0	0	0	0	0	3	0	0	0
1334	0	22	18	61	26	27	2	3	12	11	21	49	9	15	3	50	4	93
1335	3	30	384	6	2	35	4	9	10	0	22	3	10	0	0	1	22	4
1336	7	11	10	0	0	15	12	20	19	0	8	3	7	2	2	1	4	4
1337	0	0	0	0	1	1	4	0	0	0	0	0	0	0	0	0	0	0
1338	0	0	2	0	0	1	1	4	10	0	13	1	0	0	1	0	0	0
1339	4	0	0	0	0	0	6	0	0	0	0	0	0	0	0	0	0	0
1340	0	0	0	0	0	0	2	0	0	0	0	0	0	0	0	0	0	0
1341	0	0	0	0	0	0	17	0	0	0	0	0	0	0	0	0	0	0
1342	0	0	0	0	0	1	17	0	4	0	0	0	0	0	0	0	0	0
1343	3	6	0	7	9	9	4	0	0	0	14	2	0	0	1	4	2	0
1344	3	0	1	0	1	5	1	4	5	27	7	1	0	0	0	0	0	1
1345	0	2	0	0	0	3	2	0	0	0	1	0	3	0	0	0	0	0
1346	23	22	10	14	3	20	37	67	42	49	10	27	48	47	54	5	29	5
1347	0	7	11	0	11	2	1	18	3	13	14	0	10	0	4	0	0	2
1348	7	18	36	0	10	12	19	34	34	1	7	0	7	2	17	10	14	1
1349	1	1	1	2	0	1	2	8	2	0	1	4	4	13	1	1	0	2
1350	76	78	60	28	53	30	22	25	25	15	12	16	1	54	3	4	21	9
1351	1	1	3	1	0	22	5	12	29	0	0	0	0	0	0	0	0	2
1352	0	0	1	0	5	1	4	1	1	4	0	5	5	0	0	0	8	0
1353	0	0	10	5	1	0	20	5	1	20	0	3	0	0	0	5	0	4
1354	0	0	0	0	0	0	7	0	0	0	0	0	0	0	0	0	0	0
1355	0	0	0	1	8	2	4	1	0	0	0	0	0	0	0	0	0	0
1356	7	20	39	6	34	5	17	23	42	20	27	18	2	0	0	6	16	7
1357	0	1	15	1	0	0	3	1	0	0	0	0	0	0	0	0	7	1
1358	0	0	0	0	0	0	8	0	5	1	9	1	0	2	8	0	0	11
1359	0	26	9	7	14	3	15	24	10	6	10	3	8	0	0	0	1	1
1360	13	3	3	1	2	5	6	1	9	0	3	21	0	1	0	0	4	0
1361	15	47	20	4	1	1	22	3	19	0	7	8	20	2	11	14	1	9
1362	0	13	0	0	0	0	2	0	0	0	1	0	0	0	0	7	0	0
1363	0	15	0	2	1	0	1	0	5	0	0	0	0	0	0	0	0	0
1364	34	9	14	4	17	2	11	2	24	72	15	42	24	0	8	8	13	36
1365	42	19	28	7	38	19	2	72	29	7	13	6	15	8	30	4	4	1
1366	0	0	1	21	3	1	18	3	3	0	0	0	0	0	0	10	0	0
1367	1	0	0	0	0	7	4	0	2	0	6	6	1	0	0	1	0	0
1368	0	1	0	1	0	0	4	3	0	0	0	0	0	0	0	0	0	3
1369	0	0	0	0	0	0	10	0	0	0	0	0	0	0	0	0	0	0
1370	0	2	1	0	1	9	2	6	1	0	0	0	0	0	0	0	0	0
1371	20	0	0	60	24	6	5	1	0	24	8	0	898	73	22	0	12	5
1372	86	86	69	47	75	69	60	17	29	32	124	56	60	110	171	94	112	45
1373	0	0	3	0	9	0	5	11	0	0	2	0	0	0	0	0	0	0
1374	0	6	1	0	0	0	9	0	0	0	1	0	3	11	0	1	1	0
1375	7	24	13	10	8	9	10	14	1	2	4	4	23	22	21	2	1	0
1376	0	0	0	0	0	0	2	0	0	7	0	0	0	0	0	0	7	0
1377	53	87	68	2	10	3	13	12	1	0	0	0	0	0	3	2	31	5
1378	0	0	0	0	0	0	2	1	22	1	1	0	0	0	0	0	0	0
1379	6	0	0	0	22	1	25	0	0	0	0	0	0	6	0	0	0	0
1380	0	0	9	0	0	0	11	0	2	0	8	8	0	0	1	0	1	0
1381	1	18	6	4	9	6	10	17	7	11	14	33	13	0	9	0	47	3
1382	0	0	0	0	0	0	3	0	0	0	0	0	0	0	0	0	0	0
1383	0	0	0	1	0	0	4	18	0	0	0	0	0	0	0	0	0	0
1384	1	0	3	0	0	0	13	0	0	0	0	0	0	0	0	0	0	0
1385	0	2	0	0	0	1	6	0	0	0	0	0	0	1	0	0	0	0
1386	0	0	0	0	1	7	4	10	8	0	0	0	0	0	0	0	0	0
1387	0	3	0	0	0	0	8	3	10	1	0	0	0	0	0	1	1	1
1388	0	0	0	1	1	0	19	0	2	1	0	0	0	0	0	20	1	1
1389	48	3	6	11	26	0	11	1	10	25	11	41	14	27	38	24	228	30
1390	0	0	0	0	0	0	5	7	0	0	0	0	0	0	0	0	0	0
1391	0	0	0	0	1	0	4	4	0	0	0	0	0	0	0	0	0	0
1392	0	9	6	8	5	0	5	7	13	5	0	6	12	1	1	2	1	2
1393	1	35	0	583	0	0	4	0	0	41	132	0	0	4	0	0	0	0
1394	0	0	0	0	0	0	12	0	0	0	0	0	0	0	0	0	0	0
1395	0	5	1	4	0	2	1	2	0	0	2	1	0	0	0	0	0	0
1396	4	0	0	0	0	1	7	5	5	0	0	0	2	0	0	1	0	1
1397	0	9	0	0	0	0	10	0	0	1	15	0	1	0	0	1	0	0
1398	0	0	0	0	11	0	40	0	1	0	0	0	0	0	0	0	0	0
1399	0	0	0	0	0	0	11	0	0	0	0	0	0	0	5	0	0	0
1400	10	12	24	13	0	3	13	24	19	42	14	3	1	4	6	19	40	13
1401	21	26	18	1	1	17	9	12	4	3	12	7	1	1	1	8	8	13
1402	0	0	0	0	3	0	3	0	0	0	0	3	0	0	0	0	0	0
1403	5	5	0	15	2	7	7	0	0	0	2	2	7	4	7	2	13	0
1404	2	4	8	0	0	0	8	0	0	0	0	0	0	0	0	0	0	0
1405	0	0	0	0	8	0	5	9	0	0	0	0	0	0	0	0	0	10
1406	14	51	37	3	15	10	5	30	18	7	0	14	2	0	0	23	2	9
1407	0	0	0	0	0	0	4	0	0	0	0	0	0	0	0	0	0	0
1408	0	13	1	1	0	0	13	0	1	0	0	0	0	0	0	5	2	0
1409	14	7	7	3	11	4	9	29	27	12	11	7	4	17	5	7	1	15
1410	11	36	33	0	7	0	11	15	8	0	10	4	0	6	0	0	0	5
1411	0	5	4	6	0	0	5	13	6	1	5	1	5	0	0	0	0	0
1412	33	30	23	18	5	8	7	6	6	26	21	13	14	5	20	3	7	2
1413	0	0	0	0	0	0	12	0	0	3	0	3	17	0	0	0	2	0
1414	8	2	1	24	3	19	6	38	55	0	1	5	0	0	1	0	1	1
1415	0	1	0	16	9	0	2	0	1	1	0	0	0	0	2	0	0	0
1416	0	0	0	0	0	2	2	8	20	0	1	0	0	0	2	0	0	0
1417	9	0	24	10	14	2	23	5	13	30	2	1	12	0	6	0	3	0
1418	0	0	0	9	0	2	19	1	0	0	7	3	78	21	43	7	16	3
1419	2	15	14	7	15	18	20	25	34	18	22	21	34	23	46	30	17	0
1420	5	13	25	0	0	0	9	0	0	0	0	0	0	1	0	0	7	0
1421	0	29	6	0	2	11	15	19	8	1	2	0	0	0	0	1	1	13
1422	0	6	0	0	1	5	21	1	0	0	0	0	0	0	0	0	0	0
1423	0	0	2	2	2	6	6	1	40	0	8	2	6	0	11	0	5	55
1424	24	36	10	3	21	3	16	9	7	12	17	7	20	17	4	49	1	13
1425	0	0	0	32	69	100	3	1	3	0	2	37	0	0	0	80	43	28
1426	9	2	0	3	8	0	4	0	6	0	4	0	0	1	0	5	0	2
1427	0	0	1	2	1	0	11	2	7	0	7	26	15	2	29	17	73	0
1428	77	39	79	29	21	42	28	21	25	55	7	9	20	5	39	32	20	10
1429	42	4	28	0	11	5	21	4	6	0	2	0	0	1	0	0	1	30
1430	0	0	0	0	0	0	6	0	0	0	0	3	1	0	8	0	0	0
1431	0	0	0	0	0	3	4	1	5	0	0	0	0	0	0	0	0	0
1432	8	13	1	2	7	6	22	7	24	4	10	2	15	2	24	12	21	0
1433	3	8	1	6	0	0	17	0	32	28	1	1	8	0	2	9	0	14
1434	1	3	6	0	2	0	3	0	0	10	0	1	1	0	0	0	1	40
1435	9	0	0	0	1	0	1	0	2	0	0	0	1	5	0	0	0	0
1436	185	219	299	12	36	37	13	131	43	68	57	35	105	70	67	90	45	2
1437	0	0	0	4	3	0	1	9	0	0	1	12	1	2	4	0	0	0
1438	118	42	70	64	67	31	6	51	28	313	151	109	218	120	117	127	162	98
1439	0	0	1	0	0	1	3	0	2	0	0	0	0	0	0	0	0	0
1440	0	0	0	0	0	0	7	0	7	0	0	0	0	0	0	0	0	0
1441	29	57	33	36	42	8	4	9	17	5	16	15	12	4	15	2	0	0
1442	6	54	38	9	9	1	19	24	57	0	5	3	5	0	6	36	13	7
1443	5	4	1	2	4	2	3	0	0	0	0	0	0	0	3	0	0	0
1444	3	4	3	0	1	4	3	0	0	0	2	1	12	0	1	3	1	0
1445	0	2	3	2	0	0	4	19	1	0	0	0	0	0	0	0	0	0
1446	0	1	0	0	0	0	5	12	4	0	0	7	0	0	2	0	2	0
1447	0	0	0	1	0	0	4	0	1	0	0	0	0	1	0	0	0	0
1448	0	3	0	3	1	6	2	3	5	5	5	0	0	2	0	0	0	3
1449	0	1	0	0	21	0	17	4	10	0	0	0	0	0	0	0	0	0
1450	0	0	2	0	0	0	8	2	0	0	0	1	0	0	2	0	0	0
1451	0	10	28	2	8	11	20	8	2	35	3	5	0	2	10	11	7	1
1452	0	4	3	4	3	13	15	14	13	2	12	7	0	2	12	1	0	2
1453	3	0	0	0	0	0	7	4	0	9	2	0	0	7	0	2	15	0
1454	0	0	0	1	0	2	2	3	3	0	0	1	8	0	0	0	0	0
1455	0	0	0	0	0	0	3	0	0	0	0	0	0	0	0	0	0	0
1456	2	14	0	0	0	2	6	4	27	0	5	0	0	0	0	15	2	0
1457	0	2	0	0	0	0	10	0	5	0	1	0	0	0	0	0	0	0
1458	1	5	3	0	0	6	7	12	1	0	17	0	0	0	1	0	8	4
1459	0	0	0	0	0	0	5	1	0	0	0	7	0	0	0	0	0	1
1460	32	0	5	0	17	9	5	7	6	0	0	0	0	6	6	9	0	0
1461	0	1	7	1	2	0	9	4	1	0	0	0	0	0	0	4	0	14
1462	1	0	0	0	0	0	9	0	0	1	1	0	6	0	0	0	0	0
1463	1	1	0	0	1	1	1	0	1	1	0	0	3	0	0	0	0	2
1464	10	2	3	1	0	13	6	2	5	0	0	0	0	0	3	0	0	0
1465	0	0	0	0	0	0	5	0	0	0	0	0	0	0	0	0	0	0
1466	0	0	0	0	0	0	5	0	3	2	6	25	0	0	0	0	0	0
1467	7	8	1	0	2	5	2	2	4	3	0	0	0	1	0	0	0	5
1468	2	13	21	0	20	12	2	6	3	4	0	3	0	0	0	10	9	8
1469	0	0	0	0	0	0	5	0	0	0	0	0	0	0	0	0	0	0
1470	0	0	0	2	0	1	3	0	7	9	0	0	0	0	0	0	4	1
1471	0	1	0	5	7	0	1	18	0	2	9	13	25	24	30	2	0	0
1472	0	0	0	0	0	0	34	0	0	0	0	0	0	0	0	0	0	0
1473	7	3	14	4	5	9	1	0	11	9	3	0	0	5	0	5	5	2
1474	0	2	0	0	5	0	5	0	5	0	20	0	0	0	0	0	0	63
1475	1	16	1	1	0	0	8	9	0	0	0	1	0	0	0	6	0	0
1476	0	0	0	0	0	0	3	0	0	0	0	0	0	0	0	0	0	0
1477	0	0	0	0	0	0	4	0	0	0	0	0	0	0	0	0	0	0
1478	0	0	0	0	0	0	4	0	0	0	0	0	0	0	0	0	0	0
1479	0	19	8	0	13	0	30	2	7	6	6	0	0	0	4	0	0	0
1480	0	0	0	0	0	0	8	0	0	0	0	0	0	0	0	0	0	0
1481	0	1	0	0	0	0	5	0	0	0	0	0	0	0	0	0	0	0
1482	0	5	1	1	0	2	2	0	0	4	0	0	0	0	0	0	0	0
1483	14	6	0	12	1	2	1	9	9	3	2	0	3	0	0	1	0	19
1484	0	0	2	0	1	3	5	0	1	0	2	0	0	0	0	0	0	0
1485	0	0	0	0	8	0	6	7	6	0	0	0	0	0	0	7	8	0
1486	14	10	11	26	2	5	3	0	1	23	5	7	27	2	3	4	17	1
1487	0	38	0	0	0	7	12	3	11	2	1	8	0	0	0	0	0	0
1488	42	62	132	14	27	52	23	60	89	50	65	71	12	27	13	23	68	1
1489	1	0	0	0	1	0	4	0	0	0	0	8	0	0	0	0	8	0
1490	0	0	0	0	0	0	5	0	0	0	0	0	0	0	0	0	0	0
1491	10	9	14	6	11	16	8	5	15	20	4	3	0	0	0	4	0	18
1492	0	0	0	0	0	0	4	0	0	0	0	0	0	0	0	0	0	0
1493	0	0	0	0	0	0	9	0	0	0	15	0	0	32	0	0	6	0
1494	3	6	7	7	2	13	13	2	12	0	23	39	4	16	7	8	9	7
1495	0	0	0	0	0	0	2	0	0	0	0	0	0	0	0	0	0	0
1496	0	0	0	10	0	3	11	3	1	15	6	0	0	0	0	0	0	0
1497	0	0	6	2	3	1	6	4	3	5	5	4	0	0	2	11	1	4
1498	0	0	0	0	0	0	15	0	0	0	0	0	0	0	0	0	0	0
1499	0	0	0	0	0	2	9	0	0	0	0	0	0	0	0	0	0	0
1500	0	7	2	8	0	8	8	7	0	29	4	10	0	41	0	9	21	2
1501	7	0	13	0	0	0	2	2	0	0	0	0	0	0	0	0	0	0
1502	0	0	0	0	0	0	1	5	0	5	0	0	0	0	0	4	0	0
1503	9	3	22	0	0	4	4	11	3	1	7	2	6	4	5	2	8	0
1504	1	4	12	3	36	0	7	6	5	3	3	9	6	12	5	52	12	0
1505	18	25	14	8	17	4	45	31	15	12	4	25	4	1	7	2	39	7
1506	27	7	2	41	0	2	27	32	23	12	5	10	2	3	14	9	20	5
1507	5	0	27	3	19	7	4	5	15	4	2	0	0	0	0	0	0	1
1508	6	19	0	1	2	9	8	7	29	1	0	0	0	0	0	0	0	1
1509	0	0	0	0	0	0	5	0	0	0	0	0	0	0	0	0	0	0
1510	11	2	6	0	0	0	3	16	3	3	14	1	1	0	0	17	0	0
1511	12	13	22	18	21	10	15	20	34	22	9	25	7	25	20	11	7	6
1512	0	0	5	0	0	0	2	0	0	0	0	0	0	0	0	0	0	0
1513	14	12	32	18	44	15	9	29	6	11	12	13	9	40	17	15	1	12
1514	5	5	6	15	21	13	9	4	10	0	0	2	0	0	0	0	0	4
1515	0	0	0	0	6	3	14	0	3	0	4	0	0	50	3	3	1	4
1516	4	11	0	18	21	2	10	23	10	0	27	10	11	0	39	57	6	2
1517	0	42	1	0	0	0	4	0	0	1	0	0	0	0	0	0	0	0
1518	0	2	0	0	0	0	14	0	0	0	0	0	0	0	0	0	0	0
1519	1	22	36	3	9	14	12	58	50	16	0	18	0	0	0	10	5	7
1520	9	17	5	1	21	4	7	13	6	6	6	2	8	12	1	15	2	8
1521	0	1	1	0	0	0	2	3	3	0	0	0	0	7	0	0	0	3
1522	0	0	0	0	0	0	5	0	0	0	0	0	0	0	0	0	0	0
1523	3	5	0	0	0	0	1	3	0	2	0	0	0	0	0	0	0	6
1524	23	12	9	4	4	1	3	0	10	0	0	0	0	0	0	0	0	0
1525	15	9	11	3	21	4	4	28	21	14	15	42	38	11	22	9	22	14
1526	0	1	1	1	12	1	2	1	0	0	1	0	3	1	5	0	0	0
1527	16	63	73	37	28	17	25	14	24	42	19	21	9	11	10	1	4	27
1528	0	0	3	13	6	19	24	0	2	1	14	0	0	0	0	0	0	6
1529	0	0	41	0	4	43	3	5	0	0	0	3	0	0	0	27	1	0
1530	5	19	21	4	19	4	3	19	12	10	2	6	30	0	0	11	10	4
1531	24	34	8	4	1	14	9	21	8	9	0	2	1	0	1	1	1	1
1532	0	0	0	0	0	0	13	0	5	15	0	3	0	0	0	2	0	0
1533	0	0	0	0	0	0	3	0	0	0	0	0	0	0	1	0	0	0
1534	0	0	0	0	0	0	2	0	0	0	0	0	0	0	0	0	0	0
1535	1	8	2	4	1	0	32	34	11	12	30	14	3	41	65	15	9	43
1536	0	0	0	0	0	0	3	0	0	0	0	0	0	0	0	0	0	0
1537	0	0	1	0	0	0	7	1	8	6	1	0	0	0	0	0	0	0
1538	0	11	3	1	1	0	9	6	2	0	3	0	0	0	0	10	2	0
1539	4	3	0	2	7	8	1	8	2	0	0	0	0	0	0	0	0	0
1540	0	3	2	1	4	38	7	20	4	10	24	8	3	19	27	12	8	9
1541	10	3	3	0	12	1	4	24	21	4	0	1	8	5	1	2	16	1
1542	0	0	13	0	5	0	1	0	0	0	0	0	0	0	0	0	0	1
1543	0	20	5	8	1	33	3	0	0	1	0	0	4	0	0	0	0	0
1544	0	0	4	15	3	13	4	29	0	9	0	6	1	0	0	0	0	0
1545	67	33	56	23	52	45	29	25	98	62	30	49	58	54	92	41	98	13
1546	24	3	48	1	8	3	7	29	41	4	2	10	10	33	0	14	0	0
1547	0	2	29	0	0	2	8	13	0	3	0	2	0	0	0	0	1	0
1548	0	11	4	16	1	10	4	28	0	0	0	2	0	0	0	0	27	1
1549	0	0	0	0	0	0	16	0	0	0	0	0	0	0	0	0	0	0
1550	91	66	75	42	24	18	4	20	7	21	10	9	4	5	21	73	40	6
1551	1	0	0	0	0	0	5	8	0	6	0	0	0	0	0	0	0	0
1552	0	4	0	0	1	0	2	0	0	0	0	0	0	0	0	0	0	0
1553	1	23	15	7	8	3	3	1	2	2	0	6	0	3	4	0	14	1
1554	0	0	1	6	9	5	18	0	1	2	17	43	5	4	8	18	3	0
1555	0	9	0	7	1	0	8	0	3	0	0	1	9	0	0	0	0	2
1556	0	0	6	0	0	0	3	1	1	4	0	1	0	0	0	0	0	0
1557	0	2	5	0	1	0	4	0	0	5	0	0	2	0	0	0	4	62
1558	7	14	6	7	20	58	3	12	32	8	29	38	35	66	93	21	2	2
1559	73	0	58	13	33	0	13	28	30	1	28	0	0	0	26	0	71	0
1560	0	0	0	0	0	32	1	0	0	0	0	0	0	0	0	0	0	0
1561	1	3	1	2	0	2	3	0	1	0	0	6	9	0	0	0	0	0
1562	0	1	2	0	1	1	14	6	4	0	0	0	0	0	0	0	0	0
1563	0	3	9	4	2	0	9	0	0	1	6	10	2	0	3	4	39	0
1564	0	2	0	5	0	0	2	0	0	0	0	0	1	0	0	0	0	0
1565	19	2	7	0	7	6	7	0	2	0	5	5	0	0	0	3	1	0
1566	8	5	21	13	23	5	4	50	3	19	23	29	15	33	41	19	15	4
1567	2	5	1	3	0	1	7	9	4	13	11	0	0	0	0	1	1	0
1568	7	20	15	6	14	15	17	21	43	1	4	11	3	33	5	7	0	6
1569	63	127	3	25	89	93	3	32	38	0	3	0	0	0	2	0	1	1
1570	16	11	8	7	6	2	8	13	6	33	36	19	16	4	3	21	21	2
1571	0	0	0	0	0	0	2	0	0	0	0	0	0	0	0	0	0	0
1572	0	0	0	0	0	0	12	0	0	0	0	0	0	0	0	0	0	0
1573	0	0	0	7	0	1	7	0	0	1	19	0	0	21	0	0	0	0
1574	30	8	7	4	2	4	6	0	5	0	0	8	4	1	0	0	0	0
1575	6	13	5	12	35	16	6	14	19	1	3	11	5	0	8	0	12	4
1576	1	0	0	3	2	9	6	145	12	0	7	11	26	0	32	0	1	2
1577	11	8	4	7	12	4	2	9	17	14	8	0	0	0	0	16	1	2
1578	0	0	0	3	10	0	1	0	9	6	0	1	0	0	0	4	0	12
1579	1	0	0	1	16	1	1	10	3	3	0	18	0	2	17	4	0	1
1580	0	0	0	0	0	0	16	0	0	0	0	0	0	0	0	0	0	0
1581	0	0	0	0	0	0	3	0	0	0	0	0	0	0	0	0	0	0
1582	25	42	52	3	8	7	18	11	33	17	14	20	2	2	4	8	51	10
1583	0	12	15	0	0	1	6	14	15	0	5	3	0	0	0	5	4	2
1584	0	1	0	0	0	0	4	0	0	0	0	13	0	0	0	0	0	0
1585	0	3	4	2	0	0	4	0	0	0	0	0	0	0	0	0	0	0
1586	0	0	0	1	2	0	2	1	1	0	0	0	0	1	0	0	0	0
1587	2	2	1	1	1	0	8	2	1	0	2	0	0	1	0	1	11	1
1588	0	0	1	0	0	0	1	0	1	0	1	11	0	0	1	0	1	0
1589	0	0	0	6	0	14	4	2	4	0	0	13	0	0	0	0	0	0
1590	0	0	9	0	0	0	1	2	1	0	0	0	0	0	0	0	0	0
1591	42	5	19	5	1	0	7	0	0	5	6	8	0	6	0	0	3	0
1592	39	16	35	21	74	70	19	32	54	22	36	58	30	34	74	40	26	46
1593	0	0	3	1	5	6	3	1	0	0	0	0	1	0	0	6	0	0
1594	6	2	5	0	0	1	6	8	2	5	6	1	6	0	0	0	0	0
1595	0	10	0	7	0	2	4	0	2	0	3	2	7	0	2	1	0	0
1596	0	0	1	0	0	0	1	0	0	0	0	0	0	0	0	0	0	0
1597	0	11	2	0	0	1	11	39	32	1	14	1	0	0	0	4	13	15
1598	0	2	0	0	0	0	6	0	1	0	0	0	0	3	0	0	0	0
1599	0	0	0	0	0	0	3	0	0	0	0	0	0	0	0	0	0	0
1600	12	15	8	3	1	10	1	1	0	0	0	19	3	0	5	1	0	0
1601	0	0	0	0	0	0	5	0	0	0	0	0	0	0	0	0	0	0
1602	10	18	2	1	0	6	7	0	0	0	0	17	2	1	0	0	0	34
1603	17	19	2	34	60	28	2	4	4	9	34	34	39	117	60	36	32	28
1604	0	0	0	1	2	0	1	0	0	0	0	0	0	0	0	0	0	1
1605	0	0	0	0	5	0	6	0	2	0	0	0	0	0	0	0	0	0
1606	7	16	16	0	4	1	6	0	8	0	0	0	0	0	0	0	0	0
1607	0	3	10	8	5	2	7	23	2	22	13	37	39	25	29	13	28	32
1608	29	2	22	5	33	58	8	4	0	0	0	0	0	0	0	0	0	0
1609	0	1	1	0	0	1	21	2	0	0	3	0	0	0	7	0	0	0
1610	0	0	0	3	3	2	4	0	0	4	0	0	3	0	4	0	11	0
1611	2	41	17	0	0	1	3	6	19	3	20	5	0	0	0	3	2	0
1612	1	0	1	2	19	5	7	53	4	0	10	1	14	0	2	6	8	2
1613	2	7	0	5	0	1	7	17	10	0	2	2	11	0	0	0	0	2
1614	4	6	1	0	0	0	6	14	1	0	6	3	10	0	0	0	5	0
1615	7	1	4	0	1	2	8	5	9	0	2	0	0	0	0	0	0	0
1616	0	6	10	7	7	6	8	12	4	6	6	8	5	0	22	26	47	20
1617	4	3	15	1	0	0	4	0	0	0	0	0	0	0	0	0	0	0
1618	35	36	42	16	43	36	47	10	26	44	59	110	106	202	147	37	101	40
1619	0	7	1	0	0	8	1	12	1	0	0	0	0	0	0	0	0	0
1620	1	10	10	0	2	1	8	0	0	4	0	0	0	4	1	6	0	0
1621	13	10	25	0	3	3	13	14	4	32	12	2	0	2	0	7	32	10
1622	0	0	1	0	10	0	5	29	30	5	0	6	13	0	0	60	0	0
1623	0	0	0	5	0	0	5	3	0	0	3	0	26	0	0	15	1	9
1624	0	0	0	0	0	0	21	0	0	0	0	0	0	0	0	0	0	0
1625	0	0	0	0	0	9	8	3	2	0	6	0	0	0	3	5	0	0
1626	2	4	11	0	2	8	10	8	7	11	5	7	0	1	0	7	3	0
1627	6	15	3	0	7	0	9	14	6	11	18	8	3	2	5	23	2	0
1628	1	0	2	1	8	5	1	3	30	0	4	1	1	1	1	0	0	0
1629	0	20	0	5	0	0	7	9	3	9	4	17	7	0	0	1	7	0
1630	1	0	0	2	0	0	2	1	0	0	0	1	0	0	0	0	0	0
1631	4	6	0	2	0	1	1	0	1	2	0	14	0	4	0	0	0	0
1632	3	8	11	0	1	13	19	12	33	12	0	1	3	6	3	0	4	7
1633	0	0	4	0	0	2	7	4	18	0	0	0	0	0	0	0	0	0
1634	10	3	15	7	0	3	14	10	0	1	2	0	5	2	2	1	4	0
1635	0	0	0	0	0	0	5	0	0	0	0	0	0	0	0	0	0	0
1636	4	5	17	0	3	0	1	0	1	5	0	0	0	0	0	2	1	0
1637	0	0	0	2	1	0	4	1	0	0	2	0	0	0	0	0	0	2
1638	0	0	0	0	0	0	6	0	0	0	0	0	0	0	5	0	0	0
1639	0	0	0	0	0	0	19	0	6	0	8	0	0	0	0	0	0	0
1640	0	9	15	1	37	0	4	0	1	8	23	11	123	0	1	1	2	9
1641	0	1	3	10	2	8	9	8	1	13	0	1	0	0	0	0	4	0
1642	346	132	175	100	164	48	82	557	78	150	168	225	458	148	224	597	358	99
1643	1	1	6	13	6	8	7	7	4	5	3	8	2	0	7	5	4	41
1644	5	2	0	0	0	5	3	2	4	1	9	1	1	3	0	4	0	21
1645	7	1	0	15	18	3	5	4	2	0	3	2	0	0	0	7	5	0
1646	7	13	3	1	1	4	4	8	28	3	25	11	0	4	4	20	1	2
1647	28	31	39	8	19	6	11	71	45	26	21	26	12	9	11	54	29	22
1648	1	0	1	0	1	0	8	0	0	0	0	0	0	1	0	0	0	0
1649	5	9	20	0	0	2	1	0	3	0	0	0	0	0	0	0	0	0
1650	0	0	5	16	9	1	1	0	9	2	0	8	0	0	0	0	0	0
1651	0	7	43	3	0	0	13	7	2	0	0	0	1	0	0	0	0	16
1652	1	0	0	0	0	0	4	0	0	0	0	0	0	0	0	0	0	0
1653	0	0	0	0	0	0	2	4	0	0	0	0	0	0	0	0	0	0
1654	0	0	4	0	16	2	1	0	0	6	0	17	1	0	1	0	3	2
1655	0	0	0	6	1	0	12	2	0	0	0	2	0	0	0	0	6	42
1656	8	14	25	12	21	4	9	7	1	3	2	1	7	0	2	2	3	6
1657	19	16	15	10	78	6	9	50	17	28	36	54	3	5	11	12	110	4
1658	71	0	0	0	37	0	1	0	173	0	0	53	0	0	0	187	90	122
1659	0	3	0	0	1	2	10	2	4	2	39	6	0	0	0	16	3	0
1660	2	12	11	0	1	1	8	0	6	12	0	0	0	0	0	0	0	0
1661	8	0	15	12	0	0	9	26	5	0	0	3	0	0	1	0	25	0
1662	2	8	1	0	14	0	1	3	16	0	17	0	0	0	0	9	0	0
1663	0	0	0	0	0	0	4	0	0	0	0	0	0	0	0	0	1	0
1664	0	0	3	0	2	4	10	2	6	0	0	1	3	0	1	0	2	0
1665	0	0	3	0	0	0	4	6	1	1	11	8	0	0	0	0	6	0
1666	0	0	0	0	0	0	4	0	0	0	0	0	0	0	0	0	0	0
1667	0	0	0	0	0	0	4	4	0	0	0	0	2	0	0	0	0	0
1668	0	0	0	0	0	0	3	0	0	0	0	0	0	0	0	0	0	0
1669	22	58	0	19	21	7	9	3	3	4	21	0	0	0	0	3	0	47
1670	14	0	0	0	0	0	4	0	0	4	0	0	0	0	0	0	0	0
1671	6	4	7	2	31	55	20	12	50	15	13	10	0	14	2	24	30	39
1672	0	0	5	2	0	0	2	0	7	0	0	0	0	0	0	0	0	3
1673	0	0	0	0	1	0	3	0	0	0	0	0	0	0	0	0	0	0
1674	0	0	0	0	0	0	5	0	0	0	0	0	0	0	0	0	0	0
1675	54	29	78	2	41	33	3	32	1	3	10	62	33	21	35	26	142	2
1676	0	0	0	0	0	0	11	0	0	0	0	0	0	0	0	0	1	0
1677	0	0	2	0	0	0	2	0	2	0	0	1	0	0	0	0	0	0
1678	0	0	0	0	0	0	12	0	2	7	3	0	17	0	0	0	0	0
1679	1	0	0	2	23	11	6	2	1	1	7	1	3	0	0	0	25	1
1680	0	0	0	0	7	0	3	0	0	0	0	0	0	0	0	0	0	0
1681	0	0	0	8	3	8	1	2	4	0	0	7	0	1	0	3	5	1
1682	0	8	23	0	1	10	25	15	16	24	13	59	0	16	7	4	1	10
1683	15	51	10	6	2	6	15	8	37	20	25	16	0	3	0	4	11	77
1684	0	0	0	0	0	0	1	5	10	0	0	0	0	0	0	0	0	0
1685	0	0	0	0	0	0	2	0	0	0	0	0	0	0	0	0	0	0
1686	0	3	37	0	2	16	15	19	13	0	1	0	0	0	0	0	0	0
1687	0	0	0	0	4	0	12	0	14	0	0	0	0	0	0	0	0	0
1688	0	0	0	0	0	0	4	5	0	0	1	0	0	0	0	0	0	0
1689	0	0	0	1	15	0	3	2	1	2	0	5	0	0	1	0	7	0
1690	37	19	49	1	40	9	19	10	4	3	0	7	0	0	5	0	0	2
1691	0	1	0	0	0	0	2	0	1	8	0	0	0	0	0	0	0	0
1692	0	0	0	0	0	0	6	0	0	0	0	0	0	0	0	0	0	0
1693	0	0	2	9	10	2	2	0	4	0	0	0	0	0	19	0	31	0
1694	2	6	4	7	2	2	5	10	2	0	5	1	2	7	1	0	0	0
1695	1	1	7	12	51	4	1	2	2	0	11	6	1	0	0	5	67	27
1696	0	0	0	2	0	0	1	0	0	0	0	0	0	0	0	0	0	0
1697	0	0	15	1	0	22	2	0	2	0	2	2	1	0	0	0	0	0
1698	0	0	0	0	0	0	6	1	5	0	0	7	0	0	0	0	0	3
1699	13	17	2	6	6	12	13	7	9	2	2	22	29	2	17	1	6	7
1700	0	0	0	2	0	0	1	5	0	0	0	0	0	0	0	0	0	0
1701	0	0	0	2	4	0	3	0	0	0	1	0	0	0	0	0	0	5
1702	1	2	0	0	0	1	2	0	0	1	0	0	0	0	0	0	0	0
1703	4	3	0	4	0	0	2	3	7	4	0	4	7	0	10	2	13	0
1704	3	1	0	0	0	0	2	0	0	0	0	0	0	0	0	0	0	0
1705	5	2	0	0	3	19	16	0	6	0	0	1	0	0	0	0	0	0
1706	1	0	5	0	9	0	1	0	3	1	16	0	0	1	1	0	7	7
1707	3	2	1	0	0	0	1	1	0	1	0	5	0	0	0	0	0	0
1708	19	14	34	2	0	7	3	2	18	0	0	4	1	0	0	0	0	0
1709	0	0	0	0	0	0	5	0	0	0	0	0	0	0	0	0	0	0
1710	0	0	0	0	0	0	6	0	0	0	0	0	0	0	0	0	0	0
1711	0	0	11	6	3	21	2	3	1	8	0	3	1	0	7	9	9	1
1712	9	2	7	0	0	2	4	0	6	0	0	0	0	8	0	0	0	3
1713	0	0	0	0	0	0	5	0	2	10	0	0	0	0	0	0	4	0
1714	0	0	0	3	0	2	10	4	0	14	6	0	13	1	0	2	12	1
1715	0	10	0	6	0	0	1	4	7	0	1	1	0	0	0	1	0	1
1716	5	12	0	0	0	0	5	7	2	5	0	1	0	0	14	2	4	3
1717	0	2	0	1	7	11	6	0	0	0	2	19	2	37	7	0	0	0
1718	1	2	1	0	3	1	2	0	0	1	0	7	1	1	5	0	0	0
1719	1	1	0	0	0	0	6	6	5	0	0	0	0	3	0	0	0	0
1720	0	15	0	47	48	4	5	1	18	0	0	2	0	1	4	16	32	0
1721	3	0	0	0	0	0	1	2	29	0	0	1	0	0	0	0	0	0
1722	0	0	0	3	0	6	2	0	0	0	0	0	0	0	0	0	0	0
1723	0	0	0	0	0	0	6	0	0	0	0	0	0	0	0	3	0	0
1724	0	0	0	0	0	0	12	0	0	0	0	0	0	0	0	0	0	0
1725	0	0	0	0	0	0	2	0	0	0	0	0	0	0	0	0	0	0
1726	0	13	0	3	0	1	3	0	28	0	0	0	0	0	0	0	0	4
1727	0	2	0	0	0	0	2	2	0	0	0	0	0	0	0	0	0	0
1728	0	0	20	0	1	0	2	0	1	0	0	0	0	0	0	0	0	0
1729	0	5	0	0	0	0	12	0	0	0	0	0	0	0	0	0	0	0
1730	2	2	0	0	0	1	3	0	5	2	0	0	0	0	0	0	0	0
1731	5	13	9	19	17	2	10	4	27	15	8	3	20	0	5	11	4	16
1732	0	0	0	0	0	1	7	15	1	4	0	1	105	41	13	0	13	0
1733	1	0	3	0	0	7	4	21	7	0	0	12	0	8	0	1	4	0
1734	0	0	3	0	0	0	5	0	0	1	2	0	0	0	0	5	0	0
1735	5	1	7	3	5	12	16	15	13	9	3	16	0	0	2	4	6	1
1736	0	25	0	2	0	0	2	0	0	5	0	0	0	0	0	0	0	0
1737	39	38	32	4	13	12	44	19	28	41	42	37	10	1	4	56	140	24
1738	0	2	10	1	0	7	5	17	0	2	2	8	1	0	3	11	7	12
1739	0	0	0	0	0	0	42	0	13	0	0	16	0	0	0	0	0	0
1740	0	0	0	0	0	4	6	2	30	4	3	5	0	0	3	3	3	8
1741	1	5	6	1	1	2	1	7	5	0	2	9	26	1	2	26	1	10
1742	6	14	6	4	0	18	12	3	16	20	12	41	11	20	16	29	20	4
1743	0	0	0	0	0	0	5	0	0	0	0	0	0	0	0	0	0	0
1744	25	17	11	24	30	31	7	7	13	99	103	109	72	119	118	63	123	325
1745	0	0	0	1	0	0	3	0	0	0	0	6	0	0	0	0	0	0
1746	0	0	14	0	12	1	29	3	0	0	6	13	0	0	0	0	0	0
1747	0	0	0	0	0	1	4	0	1	3	0	0	0	29	0	0	0	0
1748	1	3	1	3	23	17	6	3	8	3	6	2	0	1	3	3	1	0
1749	0	0	0	0	0	0	8	0	0	0	0	0	0	0	0	0	0	1
1750	28	25	40	9	14	9	3	4	24	0	3	5	1	1	2	10	7	0
1751	1	0	1	0	0	6	2	0	1	0	0	0	0	0	0	0	0	11
1752	0	0	0	0	0	3	9	0	5	0	0	0	1	0	7	1	1	1
1753	0	6	0	0	0	10	2	5	19	0	1	0	0	0	0	0	0	4
1754	0	1	0	0	0	0	5	0	1	0	0	0	0	0	0	0	0	1
1755	1	5	4	2	0	7	7	1	5	3	0	2	0	0	1	0	0	4
1756	26	11	4	41	53	15	8	3	10	8	29	33	11	4	12	8	10	0
1757	5	0	2	0	0	0	4	0	0	0	2	0	0	0	0	0	0	0
1758	8	23	1	7	4	13	3	6	21	24	1	36	2	3	20	10	16	0
1759	0	0	0	1	0	1	2	0	0	0	0	0	0	0	0	0	0	0
1760	0	0	0	0	0	5	10	0	0	0	0	0	0	0	0	0	0	0
1761	2	0	0	0	0	0	2	0	16	1	10	0	6	0	0	0	0	0
1762	1	0	2	0	0	0	1	0	3	4	0	0	0	0	0	1	0	0
1763	2	0	10	4	5	0	7	0	11	0	2	1	0	0	7	0	14	0
1764	0	3	0	0	0	0	2	0	3	2	3	4	0	6	0	1	0	0
1765	0	2	26	0	7	0	5	3	0	7	2	3	0	17	8	0	1	1
1766	0	0	0	5	0	0	2	2	8	0	0	0	0	0	2	0	0	0
1767	0	0	0	0	0	0	5	0	0	1	0	0	0	0	0	0	0	0
1768	0	2	7	7	17	32	3	11	9	0	9	13	0	1	5	9	10	54
1769	10	5	2	1	0	0	2	5	1	1	4	1	12	0	2	12	0	0
1770	5	20	18	6	8	11	1	16	12	4	0	0	16	0	0	3	6	1
1771	0	0	3	0	10	0	2	3	4	38	0	1	0	0	1	7	3	0
1772	3	14	8	3	0	4	32	12	13	14	20	1	29	1	0	2	11	17
1773	1	0	0	2	12	7	2	0	0	1	0	1	0	0	0	0	0	1
1774	0	0	0	0	0	2	2	0	0	0	0	0	0	0	0	0	0	0
1775	0	0	3	10	9	1	6	21	3	8	0	0	0	2	1	1	0	0
1776	19	10	6	0	20	3	26	27	28	14	10	20	0	1	3	3	12	14
1777	0	0	7	6	16	2	6	0	1	0	6	4	3	0	5	1	0	0
1778	0	0	0	0	0	0	9	0	0	0	0	0	0	0	0	0	0	0
1779	9	4	11	7	1	3	4	8	3	0	1	10	0	1	0	1	7	5
1780	6	0	0	0	2	8	7	0	7	0	7	0	0	0	0	0	4	0
1781	14	21	7	18	33	12	25	35	24	32	9	11	12	4	9	0	27	188
1782	6	4	10	8	4	28	4	7	9	5	2	5	1	3	6	25	7	68
1783	1	0	8	0	0	5	4	9	8	10	0	0	0	0	0	0	3	0
1784	0	2	0	0	0	0	1	2	3	0	0	0	0	0	0	31	7	0
1785	1	0	9	0	2	3	2	5	7	32	1	5	0	0	0	0	2	2
1786	1	7	1	0	12	1	3	0	6	2	1	1	0	0	0	0	0	0
1787	0	0	0	15	6	101	1	0	0	1	4	1	0	0	0	0	0	0
1788	13	23	7	14	0	0	4	0	13	0	5	0	0	0	0	0	0	0
1789	0	13	24	4	12	27	5	22	45	12	6	7	3	16	26	8	10	0
1790	0	8	7	0	0	0	1	0	1	0	0	3	0	0	0	0	0	0
1791	0	0	0	1	1	8	1	6	2	0	1	0	0	0	0	1	2	0
1792	22	3	23	3	2	18	10	6	4	6	5	3	1	9	1	19	15	0
1793	10	21	19	2	0	0	36	33	12	31	12	14	10	0	6	0	20	3
1794	35	39	16	34	45	22	7	35	12	115	35	27	25	45	15	59	15	99
1795	1	0	11	0	0	0	3	1	6	10	0	0	0	0	0	0	0	0
1796	0	11	0	0	0	0	2	0	0	0	0	0	0	0	0	12	0	0
1797	0	5	8	1	0	3	2	2	0	0	0	0	0	0	0	0	0	10
1798	0	0	10	4	6	0	5	4	1	3	3	8	0	0	0	9	3	0
1799	1	0	2	3	0	0	1	9	0	0	0	0	0	0	0	0	52	0
1800	0	1	0	0	2	1	7	1	1	0	1	1	0	0	2	0	2	0
1801	0	0	0	0	0	0	4	0	0	0	0	0	0	0	0	0	0	0
1802	0	0	12	0	0	5	2	1	0	3	0	0	0	0	0	2	0	0
1803	1	20	5	2	7	5	1	3	4	0	4	15	0	8	3	2	20	8
1804	3	1	0	5	0	2	3	0	12	0	0	5	0	0	0	1	5	0
1805	30	2	0	0	1	0	2	3	6	0	0	0	0	0	0	0	0	0
1806	6	7	9	0	0	18	5	14	5	0	2	0	1	0	0	0	0	0
1807	0	2	1	0	0	0	4	1	0	0	0	0	0	0	0	3	0	0
1808	0	2	7	2	9	0	4	3	8	3	2	0	0	0	0	0	3	0
1809	0	0	6	20	1	8	3	3	4	0	0	0	0	0	0	0	7	0
1810	1	2	3	2	2	0	4	1	1	13	8	10	9	5	6	13	1	0
1811	0	0	3	0	0	0	3	2	0	0	0	0	0	0	0	0	0	0
1812	0	0	0	0	0	0	3	0	0	0	0	0	0	0	0	0	0	0
1813	6	4	0	0	0	0	2	0	0	0	0	0	0	0	0	0	2	0
1814	0	0	0	0	0	0	5	0	0	0	0	0	4	0	0	0	0	0
1815	0	1	1	0	1	0	1	2	0	0	0	0	0	0	0	0	0	1
1816	34	3	54	3	1	4	6	7	10	5	5	21	4	8	0	5	6	6
1817	1	220	4	0	0	0	1	8	2	0	0	0	0	0	0	0	0	0
1818	0	0	0	0	0	1	3	0	0	0	0	0	0	0	0	0	1	0
1819	0	15	5	0	29	0	1	20	1	0	2	6	0	0	5	0	0	0
1820	0	0	0	0	0	4	1	0	0	0	0	0	0	0	0	0	0	0
1821	3	22	0	2	4	4	2	0	1	0	2	4	0	0	4	2	3	0
1822	1	14	47	22	20	11	9	15	3	11	13	52	0	0	4	6	19	10
1823	0	0	1	1	0	0	2	0	0	0	0	20	0	0	0	0	0	0
1824	2	5	4	13	18	14	1	0	6	5	9	9	83	85	63	11	2	4
1825	68	60	79	27	84	92	48	101	98	25	48	60	95	142	109	90	11	24
1826	0	0	0	0	0	68	2	0	0	0	0	0	0	0	0	0	0	0
1827	0	0	7	2	8	0	1	2	1	0	0	3	0	0	1	0	3	0
1828	8	16	10	4	18	4	2	1	5	0	4	2	8	12	13	46	6	6
1829	5	0	0	0	0	0	5	0	0	0	0	1	0	0	0	6	0	1
1830	11	6	1	11	8	19	3	4	4	0	0	0	0	0	0	3	5	0
1831	0	0	0	0	0	0	5	1	0	0	7	0	17	35	0	17	0	0
1832	0	2	4	1	17	2	9	18	13	0	22	6	0	0	0	7	0	1
1833	1	0	11	0	19	1	1	0	6	0	2	0	0	0	0	12	0	0
1834	0	0	0	0	0	0	7	2	0	0	0	0	0	0	0	0	0	0
1835	0	6	0	0	17	5	2	0	0	0	0	0	0	0	0	0	0	0
1836	0	0	0	1	1	0	4	3	0	0	4	10	0	0	0	0	4	4
1837	0	0	0	0	0	0	6	0	0	0	0	0	0	0	0	0	0	0
1838	8	12	28	31	2	6	3	10	10	34	4	20	1	4	14	1	0	8
1839	60	27	73	46	64	38	27	36	7	42	40	67	20	26	44	11	147	31
1840	0	0	35	0	0	0	15	2	17	0	0	12	0	0	1	2	0	0
1841	0	17	0	0	0	55	1	0	0	0	0	0	0	0	0	0	0	0
1842	98	31	6	11	4	17	3	63	6	0	2	0	5	20	14	49	0	0
1843	0	1	0	0	0	0	2	0	1	0	7	0	0	1	0	0	0	11
1844	0	0	0	0	0	1	2	0	0	7	2	4	0	0	3	179	21	3
1845	0	0	0	0	0	0	4	0	1	0	0	0	0	0	0	0	0	0
1846	0	0	0	0	7	0	5	5	0	0	7	2	0	0	0	0	0	0
1847	0	0	0	0	0	0	1	1	0	0	0	0	4	0	1	0	0	0
1848	8	21	4	0	2	13	15	14	3	1	0	1	0	2	0	0	9	0
1849	5	5	3	0	1	1	2	0	5	8	0	5	4	0	14	19	2	3
1850	0	0	0	0	0	0	2	0	0	0	0	3	5	0	1	0	0	0
1851	0	0	0	0	0	0	6	0	0	0	4	1	2	3	7	1	3	0
1852	1	0	0	0	4	0	5	5	0	0	0	0	0	0	0	0	0	0
1853	0	2	8	1	0	0	5	1	0	11	0	3	0	0	0	0	0	0
1854	0	0	0	0	0	0	3	0	0	0	0	0	0	8	0	0	1	0
1855	0	3	0	0	0	0	2	7	0	4	0	5	0	0	0	0	0	0
1856	13	18	15	3	2	8	17	11	1	8	11	18	0	0	15	6	11	8
1857	0	0	0	0	0	0	1	0	0	0	0	5	0	0	0	0	0	0
1858	7	13	0	3	1	0	2	4	2	10	8	8	16	0	0	1	2	2
1859	3	0	8	9	4	1	3	0	0	1	0	0	0	0	0	2	4	0
1860	0	0	0	0	0	0	2	0	0	0	0	0	0	0	0	0	14	0
1861	0	5	0	0	3	0	5	0	0	3	3	0	0	0	0	0	0	0
1862	0	0	0	0	3	0	13	0	0	0	0	0	0	0	0	0	0	0
1863	0	2	1	1	3	13	1	2	5	1	3	0	0	0	0	0	0	0
1864	0	0	0	0	0	0	2	0	0	0	0	0	0	0	0	0	2	0
1865	0	5	0	0	0	1	2	3	16	3	1	3	5	0	0	0	11	2
1866	27	9	0	13	4	13	12	8	9	47	16	10	24	11	25	24	26	6
1867	0	3	0	0	0	12	1	26	4	0	0	0	5	0	3	0	12	1
1868	0	0	2	1	19	3	3	0	0	0	9	1	1	0	0	0	0	0
1869	0	9	0	0	0	1	3	0	20	0	0	0	0	0	0	0	0	0
1870	18	21	21	16	5	15	4	17	24	9	1	0	11	0	17	13	0	2
1871	8	7	0	1	1	1	2	1	1	0	0	0	0	6	0	2	1	0
1872	0	2	0	5	0	0	1	0	0	4	2	3	0	0	0	0	1	0
1873	6	16	11	2	13	5	3	4	3	0	1	0	0	0	0	0	0	3
1874	1	44	5	0	0	5	3	1	0	0	0	2	3	3	0	0	1	1
1875	1	5	1	0	1	2	3	16	7	0	1	0	0	5	0	0	0	3
1876	30	35	60	66	352	78	11	9	1	52	48	66	62	131	177	86	58	16
1877	0	0	0	0	0	19	1	0	0	0	0	0	0	0	0	0	0	0
1878	0	0	0	0	0	0	4	0	0	0	2	0	0	0	0	0	0	0
1879	1	0	1	0	1	0	5	0	0	0	0	0	0	0	0	0	0	2
1880	1	0	0	0	0	0	2	1	0	0	0	0	0	0	0	0	0	0
1881	0	0	0	8	0	4	2	3	0	3	6	5	0	1	0	0	0	0
1882	3	8	0	0	0	6	1	3	3	0	0	6	0	0	0	1	6	0
1883	0	0	4	0	0	0	11	7	9	0	0	1	0	0	0	0	2	0
1884	0	5	0	4	0	7	1	0	0	0	0	0	0	0	0	0	0	0
1885	1	22	12	1	4	0	2	11	4	0	0	0	0	0	0	2	0	0
1886	0	4	3	1	2	3	4	8	0	0	0	14	19	0	6	6	3	1
1887	126	15	18	6	17	2	10	23	15	179	104	180	307	29	21	16	49	132
1888	2	2	7	0	0	4	1	0	9	0	8	0	0	0	0	0	0	6
1889	49	1	96	144	46	49	1	9	37	141	21	52	1	89	72	89	73	147
1890	0	0	0	0	0	0	1	0	0	0	0	0	0	0	0	5	0	0
1891	0	0	0	0	4	0	1	0	0	0	0	0	0	0	0	0	0	0
1892	5	0	0	0	0	2	9	2	0	1	4	0	3	4	0	0	8	3
1893	0	1	0	0	0	0	1	0	0	0	0	0	0	0	0	0	0	0
1894	0	0	0	0	0	0	6	0	1	0	0	0	0	0	0	1	0	2
1895	0	0	6	0	0	0	5	0	3	13	0	0	0	0	0	1	0	0
1896	0	7	1	3	1	0	1	10	1	16	5	4	0	1	11	6	0	0
1897	0	0	0	0	0	0	6	0	0	0	0	0	0	0	0	0	0	0
1898	0	1	18	12	8	2	6	31	17	9	2	16	0	0	0	3	18	2
1899	0	0	0	0	0	0	6	0	0	0	0	0	0	0	0	0	0	0
1900	0	0	0	0	1	3	6	1	1	0	0	0	0	0	0	0	0	0
1901	11	4	1	2	1	0	7	11	10	7	18	3	0	0	0	4	23	6
1902	1	0	0	0	0	0	4	0	0	0	0	0	0	0	0	3	1	0
1903	2	6	19	6	19	21	12	31	5	21	33	51	6	8	52	10	8	1
1904	0	8	2	0	0	0	4	2	2	0	11	0	0	0	0	0	0	0
1905	0	0	0	0	0	0	11	24	0	2	1	0	0	0	0	0	0	0
1906	17	13	39	22	30	18	28	16	45	3	22	17	22	24	22	23	3	118
1907	0	0	0	27	10	0	3	5	0	0	1	36	19	38	28	4	4	0
1908	4	2	1	0	0	0	4	0	7	1	1	0	2	0	13	0	3	0
1909	0	1	4	0	2	1	2	1	17	7	2	0	0	0	0	0	3	1
1910	63	9	26	3	3	17	3	11	5	28	1	0	7	0	0	1	4	0
1911	39	15	0	1	2	2	2	13	3	37	0	16	7	0	1	7	18	40
1912	0	0	0	4	0	0	2	0	15	0	0	0	0	0	0	0	0	0
1913	0	0	0	0	0	19	1	0	0	0	0	0	0	0	0	0	0	0
1914	0	18	0	13	3	25	11	1	16	10	8	8	4	0	26	0	66	7
1915	6	7	4	0	1	3	4	0	0	22	0	0	0	0	0	0	0	0
1916	0	1	0	0	0	0	2	0	1	0	0	0	0	0	1	0	0	1
1917	1	11	4	0	4	0	3	13	0	0	0	0	0	0	0	0	0	0
1918	0	0	1	0	1	10	1	2	3	1	0	0	0	0	0	0	23	0
1919	23	2	9	18	0	7	11	0	1	7	3	1	1	0	3	0	1	0
1920	0	0	0	1	0	0	1	13	0	5	1	3	11	0	0	0	2	0
1921	1	8	2	0	1	3	5	24	30	2	43	23	57	2	5	4	30	5
1922	0	0	0	0	0	2	2	3	2	0	1	0	0	1	1	0	0	0
1923	0	0	0	1	0	0	2	0	0	2	0	0	0	0	0	1	0	0
1924	0	0	0	0	0	0	2	0	0	0	1	0	0	0	0	0	6	0
1925	0	0	0	0	0	5	1	0	0	11	2	0	0	0	0	0	0	0
1926	18	20	0	0	9	0	4	6	1	0	1	0	0	0	0	9	3	0
1927	0	5	0	8	0	0	6	0	1	0	0	1	0	0	0	18	0	3
1928	32	77	125	7	66	19	62	31	81	95	45	62	16	0	14	23	39	57
1929	0	0	0	4	11	3	1	0	0	0	0	8	0	0	28	2	0	0
1930	0	2	0	0	0	1	4	0	0	0	0	0	2	2	0	0	1	8
1931	4	0	0	0	0	1	1	3	0	0	0	0	0	0	0	0	0	0
1932	9	7	15	45	56	35	2	3	10	11	17	32	63	24	49	57	6	13
1933	6	3	29	0	21	1	2	0	11	0	4	0	0	0	0	0	2	0
1934	38	0	0	4	9	0	4	5	2	13	0	5	1	0	5	0	0	6
1935	0	4	2	0	12	0	3	11	7	1	0	0	0	0	0	1	0	0
1936	0	0	0	0	0	0	3	0	0	0	0	0	0	0	0	0	0	0
1937	2	1	0	0	1	0	10	4	1	8	0	2	0	0	0	0	0	14
1938	0	0	0	0	4	9	3	0	0	0	0	0	0	0	0	0	1	0
1939	0	0	2	2	0	0	1	0	0	0	0	0	0	0	0	0	0	0
1940	0	0	0	13	2	1	1	2	0	0	4	0	0	2	0	0	1	12
1941	8	59	4	1	4	3	3	0	4	10	0	2	13	2	19	3	18	2
1942	0	16	0	0	1	7	2	2	0	0	0	0	0	0	4	0	0	0
1943	0	7	3	0	6	0	2	0	0	0	0	0	0	0	0	9	0	0
1944	0	0	0	0	1	1	2	0	0	1	5	8	0	1	7	2	0	0
1945	0	0	0	0	0	0	3	0	1	0	1	1	0	0	0	0	0	0
1946	1	1	14	0	9	1	5	0	7	0	0	0	0	0	0	0	0	8
1947	16	8	3	4	11	7	6	6	2	1	4	12	2	2	3	0	7	12
1948	6	9	1	14	14	1	6	10	8	8	9	17	11	9	0	4	6	12
1949	0	0	0	1	0	9	2	4	0	0	0	0	0	0	0	0	0	0
1950	0	13	6	0	0	16	3	0	0	0	0	8	2	0	3	0	0	1
1951	0	0	0	1	28	1	4	0	1	0	0	1	10	12	0	0	0	0
1952	0	0	0	2	0	0	3	3	0	0	0	0	0	0	0	0	0	0
1953	0	0	16	0	1	1	1	1	5	41	1	0	0	0	0	9	2	4
1954	2	5	0	14	1	2	6	9	5	8	0	6	30	1	0	6	0	0
1955	0	0	0	0	0	0	7	0	0	0	0	0	0	0	0	0	0	0
1956	0	0	0	1	0	4	1	0	0	0	0	0	0	0	6	0	0	0
1957	0	0	0	4	1	0	1	0	0	0	0	0	0	43	0	5	0	0
1958	0	4	0	2	25	1	2	0	3	1	2	1	23	1	1	1	0	0
1959	0	0	0	0	0	0	2	0	0	0	0	0	0	0	0	0	0	0
1960	58	33	48	0	1	2	1	1	0	0	0	0	0	0	0	0	0	0
1961	1	1	0	1	0	7	2	0	0	0	2	0	0	0	0	0	0	0
1962	1	0	15	19	16	12	3	11	5	10	10	35	11	18	36	9	38	7
1963	0	1	3	1	10	0	3	3	2	25	0	0	0	0	1	1	8	0
1964	0	0	0	0	17	0	3	0	0	8	6	0	0	0	0	0	0	0
1965	0	0	0	0	0	0	6	0	0	0	0	0	0	0	0	0	0	0
1966	0	0	0	0	0	2	1	8	0	0	0	0	0	0	0	4	0	0
1967	0	2	2	0	0	0	2	0	0	2	0	0	0	0	0	0	0	0
1968	107	119	179	182	194	366	105	127	79	71	165	157	67	117	207	285	109	97
1969	0	5	7	3	22	12	3	2	20	0	19	8	50	36	16	1	26	0
1970	2	0	0	0	0	0	3	0	0	0	0	0	0	0	0	0	0	0
1971	0	0	0	0	0	0	6	0	1	0	2	2	0	0	0	1	0	0
1972	0	0	0	0	0	0	5	0	0	0	0	0	0	0	0	0	0	0
1973	0	0	0	3	0	0	1	0	0	0	1	0	0	1	0	0	0	0
1974	12	37	13	27	32	15	2	12	18	8	12	6	7	9	10	8	7	1
1975	24	46	65	10	24	63	39	89	35	10	10	54	13	54	25	48	25	4
1976	0	0	0	2	0	0	1	0	2	2	0	0	0	0	0	1	0	0
1977	117	200	138	64	62	146	12	25	55	42	179	88	112	209	158	55	41	21
1978	0	0	0	0	0	0	5	0	5	0	1	0	0	0	0	0	0	0
1979	0	0	1	0	0	0	4	0	1	1	2	0	0	0	0	0	0	0
1980	0	1	0	0	7	1	3	12	2	0	0	0	0	0	0	1	0	0
1981	0	0	1	0	0	0	3	0	0	0	0	0	0	0	0	0	0	0
1982	0	0	1	0	0	0	2	0	0	0	1	2	0	0	0	0	0	5
1983	41	11	21	21	9	3	9	4	9	3	7	7	9	16	29	2	7	2
1984	0	0	0	2	0	1	3	0	3	0	3	1	0	0	0	1	22	0
1985	6	4	14	0	15	1	3	1	4	0	1	10	0	0	5	10	0	3
1986	3	0	1	27	17	211	5	0	0	2	26	5	30	109	56	0	0	0
1987	2	7	4	0	0	6	1	1	7	1	3	0	0	0	0	0	0	6
1988	0	0	0	2	29	0	1	1	0	18	0	11	3	0	2	15	2	0
1989	0	1	1	1	16	1	1	0	20	1	1	0	0	0	0	0	0	0
1990	0	0	0	0	14	1	1	1	1	2	2	0	0	0	0	1	0	2
1991	18	18	14	2	16	2	9	8	1	9	11	11	8	0	1	5	51	4
1992	1	7	6	0	0	2	3	9	6	12	1	8	12	0	1	0	2	0
1993	0	0	0	0	0	23	2	0	0	0	0	0	0	0	0	0	0	1
1994	1	5	1	0	0	0	1	31	9	3	7	4	16	13	17	2	1	1
1995	0	1	0	0	6	3	10	7	12	0	0	2	4	1	0	3	0	1
1996	0	0	5	0	0	0	2	0	0	0	0	0	0	0	0	0	0	0
1997	0	0	0	0	0	0	3	0	9	0	0	0	0	0	1	0	0	2
1998	2	2	0	9	7	0	4	4	16	1	11	0	4	0	5	3	9	1
[truncated: 5,096 more rows]
