# Supplementary material for: Bio-organic fertilizers improve Dendrocalamus farinosus growth by remolding the soil microbiome and metabolome
Source: Front Microbiol. 2023 Feb 15;14:1117355. doi: 10.3389/fmicb.2023.1117355 (PMC9975161; doi:10.3389/fmicb.2023.1117355)
Supplement: Supplementary file 2 [file Table_2.XLSX]

## Sheet: Table S3
Table S3. Detailed data from the COG and KEGG analyses of 16S rRNA sequences

## Sheet: ko_prediction
KO_ID	Ba.1	Ba.2	Ba.3	BmK.1	BmK.2	BmK.3	CK.1	CK.2	CK.3	OF.1	OF.2	OF.3	OFBa.1	OFBa.2	OFBa.3	OFBmK.1	OFBmK.2	OFBmK.3	KEGG_Pathways
K01365	0	0	0	0	0	0	0	0	0	0	0	0	0	0	0	0	0	0	[["Human Diseases", "Immune System Diseases", "Rheumatoid arthritis"], ["Metabolism", "Enzyme Families", "Peptidases"], ["Organismal Systems", "Immune System", "Antigen processing and presentation"], ["Cellular Processes", "Transport and Catabolism", "Phagosome"], ["Genetic Information Processing", "Folding, Sorting and Degradation", "Chaperones and folding catalysts"], ["Cellular Processes", "Tr…
K01364	0	0	0	0	0	0	0	0	0	0	0	0	0	0	0	0	0	0	[["Metabolism", "Enzyme Families", "Peptidases"]]
K01361	29	16	23	5	36	37	1	1	13	18	34	8	33	24	22	11	43	40	[["Genetic Information Processing", "Folding, Sorting and Degradation", "Chaperones and folding catalysts"], ["Metabolism", "Enzyme Families", "Peptidases"]]
K01360	0	0	0	0	0	0	0	0	0	0	0	0	0	1	0	0	0	1	[["None"]]
K01362	45989	51918	52780	38931	55888	46147	50446	56190	55375	53601	46020	54743	49688	44610	49281	49535	53439	42923	[["Unclassified", "Metabolism", "Amino acid metabolism"]]
K02249	9	9	11	1	1	0	2	1	0	1	0	0	125	26	35	0	2	0	[["Environmental Information Processing", "Membrane Transport", "Secretion system"]]
K05841	613	605	807	505	707	434	598	697	835	708	497	517	451	252	524	722	436	792	[["Metabolism", "Glycan Biosynthesis and Metabolism", "Glycosyltransferases"]]
K05844	3951	4362	4528	3361	5421	3791	3596	4710	4902	4006	3336	4213	5265	3287	4070	3885	4395	3752	[["Genetic Information Processing", "Translation", "Ribosome Biogenesis"]]
K05845	7587	10292	9604	6797	9805	7500	10018	9023	9189	13584	9517	11458	10058	9991	11280	9894	10712	8081	[["Environmental Information Processing", "Membrane Transport", "ABC transporters"], ["Environmental Information Processing", "Membrane Transport", "Transporters"]]
K05846	17443	22411	20740	17601	20975	15632	19807	19146	18639	25747	21855	23194	23356	21101	22998	21922	22406	18009	[["Environmental Information Processing", "Membrane Transport", "ABC transporters"], ["Environmental Information Processing", "Membrane Transport", "Transporters"]]
K05847	12153	15925	14506	12089	16117	11998	15335	14569	15022	18551	15323	17172	17096	16012	16616	15594	16245	13469	[["Environmental Information Processing", "Membrane Transport", "ABC transporters"], ["Environmental Information Processing", "Membrane Transport", "Transporters"]]
K00508	6388	7067	6903	4431	6998	4789	5587	6178	5351	8018	6397	7302	8494	5903	7843	7480	7701	5713	[["Metabolism", "Lipid Metabolism", "Linoleic acid metabolism"], ["Metabolism", "Lipid Metabolism", "Lipid biosynthesis proteins"]]
K00500	7490	9109	8406	6627	11174	8462	9998	9558	10165	10733	9105	10469	10323	9287	9378	9168	9655	7539	[["Metabolism", "Amino Acid Metabolism", "Phenylalanine, tyrosine and tryptophan biosynthesis"], ["Metabolism", "Amino Acid Metabolism", "Phenylalanine metabolism"]]
K00507	15209	17810	17565	12412	21205	15744	18018	18982	18750	21554	16326	20442	20413	15182	18466	18993	20639	15424	[["Organismal Systems", "Endocrine System", "PPAR signaling pathway"], ["Metabolism", "Lipid Metabolism", "Lipid biosynthesis proteins"], ["Metabolism", "Lipid Metabolism", "Biosynthesis of unsaturated fatty acids"]]
K00504	577	581	622	332	494	391	519	654	499	582	518	681	404	459	480	444	514	381	[["Unclassified", "Metabolism", "Others"]]
K00505	438	430	439	424	661	548	451	412	377	1342	738	965	1076	534	929	716	510	609	[["Organismal Systems", "Endocrine System", "Melanogenesis"], ["Metabolism", "Metabolism of Cofactors and Vitamins", "Riboflavin metabolism"], ["Metabolism", "Amino Acid Metabolism", "Tyrosine metabolism"], ["Metabolism", "Biosynthesis of Other Secondary Metabolites", "Isoquinoline alkaloid biosynthesis"], ["Metabolism", "Biosynthesis of Other Secondary Metabolites", "Betalain biosynthesis"]]
K12521	17	3	0	3	4	0	0	0	0	0	1	0	0	14	0	0	0	26	[["Environmental Information Processing", "Membrane Transport", "Secretion system"]]
K01101	548	484	521	774	470	789	384	395	385	518	497	496	724	719	841	750	436	832	[["Metabolism", "Xenobiotics Biodegradation and Metabolism", "Aminobenzoate degradation"]]
K01103	552	462	649	796	401	366	297	536	484	328	734	287	165	149	296	365	311	276	[["Metabolism", "Carbohydrate Metabolism", "Fructose and mannose metabolism"]]
K12520	0	0	0	1	0	0	0	0	0	0	0	0	0	0	0	0	0	0	[["Environmental Information Processing", "Membrane Transport", "Secretion system"]]
K01104	33515	38041	36940	30934	37443	31674	32921	36190	34885	41480	34387	39192	39365	34600	38423	37744	38414	35487	[["Unclassified", "Cellular Processes and Signaling", "Signal transduction mechanisms"]]
K05592	15878	16642	16386	15200	16976	15052	13753	16583	15277	16538	16511	16236	18408	16226	16764	16638	16187	16122	[["Genetic Information Processing", "Translation", "Ribosome Biogenesis"], ["Genetic Information Processing", "Folding, Sorting and Degradation", "RNA degradation"]]
K05593	599	619	736	2507	536	572	484	687	497	596	1305	461	491	491	459	691	582	801	[["Unclassified", "Metabolism", "Others"]]
K05590	93	75	47	1567	57	70	37	27	58	183	840	33	81	245	88	62	99	272	[["Genetic Information Processing", "Translation", "Ribosome Biogenesis"]]
K05591	2751	2738	3056	3689	4081	3013	2352	2695	2714	2973	3684	3260	4882	2900	3091	3467	3541	3300	[["Genetic Information Processing", "Translation", "Ribosome Biogenesis"]]
K05596	3227	3660	3943	3436	3159	2093	2401	2657	2396	3369	4261	3077	3398	2593	3161	4105	3344	3467	[["Genetic Information Processing", "Transcription", "Transcription factors"], ["Genetic Information Processing", "Replication and Repair", "Chromosome"]]
K05597	319	264	387	118	196	228	94	225	210	205	298	186	110	66	125	280	226	303	[["Metabolism", "Amino Acid Metabolism", "Arginine and proline metabolism"], ["Metabolism", "Metabolism of Other Amino Acids", "D-Glutamine and D-glutamate metabolism"], ["Metabolism", "Amino Acid Metabolism", "Alanine, aspartate and glutamate metabolism"], ["Metabolism", "Energy Metabolism", "Nitrogen metabolism"]]
K05594	2	6	4	120	4	18	2	0	1	51	32	0	1	6	0	2	4	35	[["Unclassified", "Poorly Characterized", "Function unknown"]]
K05595	16526	19453	18290	17121	19443	16183	19114	19487	19860	21078	19014	20305	18086	17857	18925	18138	19707	15950	[["Unclassified", "Cellular Processes and Signaling", "Other transporters"]]
K05599	10	11	27	7	11	18	1	3	3	8	35	6	12	8	12	2	8	66	[["Metabolism", "Xenobiotics Biodegradation and Metabolism", "Aminobenzoate degradation"], ["Metabolism", "Energy Metabolism", "Nitrogen metabolism"]]
K11964	0	0	0	0	0	0	0	0	0	0	0	0	0	0	0	0	0	0	[["Genetic Information Processing", "Folding, Sorting and Degradation", "Ubiquitin system"]]
K11962	16	0	10	0	0	0	12	0	0	52	26	0	2	36	0	26	4	284	[["Environmental Information Processing", "Membrane Transport", "ABC transporters"], ["Environmental Information Processing", "Membrane Transport", "Transporters"]]
K14540	2151	1946	2058	2715	2243	2044	1846	2007	2178	2348	2630	1698	1866	2500	2268	2169	2104	3227	[["Genetic Information Processing", "Translation", "Ribosome Biogenesis"]]
K12529	322	381	270	167	190	96	116	178	117	286	344	298	374	425	526	318	318	275	[["Metabolism", "Metabolism of Other Amino Acids", "Selenocompound metabolism"]]
K12528	0	1	2	37	0	0	0	0	1	1	15	0	0	1	0	0	0	9	[["Metabolism", "Metabolism of Other Amino Acids", "Selenocompound metabolism"]]
K06353	1	0	0	0	0	0	2	0	0	0	0	0	1	1	1	0	0	0	[["Unclassified", "Cellular Processes and Signaling", "Sporulation"]]
K02456	21993	26760	26459	21943	31673	24334	29342	29625	31752	28963	25997	29267	25285	23703	25143	24692	28360	22926	[["Environmental Information Processing", "Membrane Transport", "Secretion system"], ["Environmental Information Processing", "Membrane Transport", "Bacterial secretion system"]]
K02457	7341	7899	8097	7383	9405	7044	7071	8246	7900	7611	8741	8976	10213	8325	8206	8189	8185	8125	[["Environmental Information Processing", "Membrane Transport", "Secretion system"], ["Environmental Information Processing", "Membrane Transport", "Bacterial secretion system"]]
K02454	14860	15317	16555	13555	18771	14465	13499	17137	16485	14317	15335	16310	18255	13342	14521	15477	16721	15786	[["Environmental Information Processing", "Membrane Transport", "Secretion system"], ["Environmental Information Processing", "Membrane Transport", "Bacterial secretion system"]]
K02455	10454	10636	11485	9580	13034	9898	9749	11934	11693	9949	11018	11503	12100	9718	10345	10360	11385	11098	[["Environmental Information Processing", "Membrane Transport", "Secretion system"], ["Environmental Information Processing", "Membrane Transport", "Bacterial secretion system"]]
K02452	4574	4644	5206	5009	4505	3180	3855	5128	5331	4214	5023	4245	3580	3876	3159	3570	3709	4529	[["Environmental Information Processing", "Membrane Transport", "Secretion system"], ["Environmental Information Processing", "Membrane Transport", "Bacterial secretion system"]]
K02453	17007	21129	20620	17774	25117	18958	23880	23741	25353	23902	21083	23190	21088	20003	20849	19547	21341	17976	[["Environmental Information Processing", "Membrane Transport", "Secretion system"], ["Environmental Information Processing", "Membrane Transport", "Bacterial secretion system"]]
K02450	1149	1076	1290	1412	1029	1086	726	1123	997	975	1306	1206	661	383	416	1063	1944	1038	[["Environmental Information Processing", "Membrane Transport", "Secretion system"]]
K02103	122	104	146	612	184	236	145	89	136	305	455	117	410	484	183	150	100	406	[["Genetic Information Processing", "Transcription", "Transcription factors"]]
K08138	146	172	91	286	101	262	137	92	207	160	118	136	176	296	266	280	198	174	[["Environmental Information Processing", "Membrane Transport", "Transporters"]]
K02108	21381	24470	22961	20980	25583	21686	22652	23594	23655	26130	23911	25599	25100	24150	24873	23997	24856	21966	[["Genetic Information Processing", "Folding, Sorting and Degradation", "Chaperones and folding catalysts"], ["Metabolism", "Energy Metabolism", "Photosynthesis proteins"], ["Metabolism", "Energy Metabolism", "Oxidative phosphorylation"], ["Metabolism", "Energy Metabolism", "Photosynthesis"]]
K02109	31551	37656	34934	31676	39725	32760	36923	37703	38518	39819	36222	39716	36767	36552	37097	35557	37718	32248	[["Metabolism", "Energy Metabolism", "Photosynthesis proteins"], ["Metabolism", "Energy Metabolism", "Oxidative phosphorylation"], ["Metabolism", "Energy Metabolism", "Photosynthesis"]]
K02458	6703	6991	7386	6568	8375	6000	6181	7400	7458	6937	7596	7809	8898	6912	6690	6828	7298	7638	[["Environmental Information Processing", "Membrane Transport", "Secretion system"], ["Environmental Information Processing", "Membrane Transport", "Bacterial secretion system"]]
K02459	6647	6878	7346	6500	8298	5928	6122	7353	7364	6882	7547	7727	8792	6827	6483	6730	7205	7609	[["Environmental Information Processing", "Membrane Transport", "Secretion system"], ["Environmental Information Processing", "Membrane Transport", "Bacterial secretion system"]]
K08137	129	124	74	1597	96	92	92	61	100	211	870	62	108	228	152	110	125	205	[["Environmental Information Processing", "Membrane Transport", "Transporters"]]
K03851	41	48	30	59	75	30	73	34	27	24	95	50	25	36	61	54	34	84	[["Metabolism", "Amino Acid Metabolism", "Amino acid related enzymes"], ["Metabolism", "Metabolism of Other Amino Acids", "Taurine and hypotaurine metabolism"]]
K03850	0	0	0	0	0	0	0	0	0	0	0	0	0	0	0	0	0	0	[["Metabolism", "Glycan Biosynthesis and Metabolism", "Glycosyltransferases"], ["Metabolism", "Glycan Biosynthesis and Metabolism", "N-Glycan biosynthesis"]]
K03852	104	125	155	96	159	83	71	78	66	274	224	173	152	197	316	238	71	138	[["Metabolism", "Metabolism of Other Amino Acids", "Taurine and hypotaurine metabolism"]]
K03855	1290	1508	1654	995	1329	1311	1324	1579	1385	1500	1270	1535	1135	1273	1242	1281	1568	1108	[["Unclassified", "Metabolism", "Energy metabolism"]]
K03856	11794	16030	14390	13928	17108	14434	18287	17407	18359	20168	15147	18390	13970	14535	15007	13955	18526	12235	[["Metabolism", "Amino Acid Metabolism", "Phenylalanine, tyrosine and tryptophan biosynthesis"]]
K13018	418	417	562	420	628	355	478	642	795	385	239	273	252	207	370	265	283	317	[["Metabolism", "Glycan Biosynthesis and Metabolism", "Lipopolysaccharide biosynthesis proteins"]]
K13019	32	32	61	110	47	20	17	14	19	13	48	33	80	58	18	20	14	90	[["Metabolism", "Glycan Biosynthesis and Metabolism", "Lipopolysaccharide biosynthesis proteins"]]
K13010	1097	872	1063	614	1116	755	865	1185	1262	767	618	654	516	415	697	668	754	505	[["Metabolism", "Glycan Biosynthesis and Metabolism", "Lipopolysaccharide biosynthesis proteins"], ["Metabolism", "Amino Acid Metabolism", "Amino acid related enzymes"]]
K13011	274	130	125	86	232	144	152	148	118	124	152	123	160	156	144	74	113	104	[["Metabolism", "Glycan Biosynthesis and Metabolism", "Lipopolysaccharide biosynthesis proteins"]]
K13012	1530	1450	1651	1202	1591	1457	967	1731	1449	1288	1204	1243	1608	1253	1183	1484	1403	1880	[["Metabolism", "Glycan Biosynthesis and Metabolism", "Lipopolysaccharide biosynthesis proteins"]]
K13013	1595	1558	1564	1059	1577	1256	1519	1645	1397	1577	1419	1759	1531	1656	1884	1365	1591	1161	[["Metabolism", "Glycan Biosynthesis and Metabolism", "Lipopolysaccharide biosynthesis proteins"]]
K13014	141	98	101	1577	98	116	29	33	67	205	879	43	84	225	89	68	99	328	[["Metabolism", "Glycan Biosynthesis and Metabolism", "Lipopolysaccharide biosynthesis proteins"]]
K13015	5203	7314	6677	5062	8155	6518	8789	8505	9111	8710	6291	7864	6614	6586	7108	7115	7314	5367	[["Metabolism", "Glycan Biosynthesis and Metabolism", "Lipopolysaccharide biosynthesis proteins"]]
K13016	240	498	216	553	156	152	138	167	187	166	655	82	124	570	239	202	264	340	[["Metabolism", "Glycan Biosynthesis and Metabolism", "Lipopolysaccharide biosynthesis proteins"]]
K13017	2520	4326	3757	3240	5081	3814	6014	4801	5655	5406	3913	4692	3669	4365	4107	3494	4337	2735	[["Metabolism", "Glycan Biosynthesis and Metabolism", "Lipopolysaccharide biosynthesis proteins"], ["Metabolism", "Amino Acid Metabolism", "Amino acid related enzymes"]]
K08566	3	18	3	111	9	18	9	1	9	150	30	1	7	83	36	2	23	94	[["Metabolism", "Enzyme Families", "Peptidases"]]
K08567	2038	2529	2468	3791	2920	2089	2959	2782	3166	2397	3051	2187	1975	1944	2192	1882	2284	1425	[["Metabolism", "Enzyme Families", "Peptidases"]]
K13274	9	10	11	1	2	0	5	0	0	2	0	1	125	26	35	0	0	1	[["Genetic Information Processing", "Folding, Sorting and Degradation", "Chaperones and folding catalysts"], ["Metabolism", "Enzyme Families", "Peptidases"]]
K13275	13	18	13	6	4	4	6	2	3	10	5	6	134	95	46	10	14	7	[["Genetic Information Processing", "Folding, Sorting and Degradation", "Chaperones and folding catalysts"], ["Metabolism", "Enzyme Families", "Peptidases"]]
K13276	14	16	12	3	3	2	2	1	3	6	4	4	132	30	43	9	14	6	[["Genetic Information Processing", "Folding, Sorting and Degradation", "Chaperones and folding catalysts"], ["Metabolism", "Enzyme Families", "Peptidases"]]
K13277	9	9	11	0	1	0	2	0	0	0	0	0	125	26	35	0	0	0	[["Genetic Information Processing", "Folding, Sorting and Degradation", "Chaperones and folding catalysts"], ["Metabolism", "Enzyme Families", "Peptidases"]]
K03275	67	46	38	1451	42	52	18	26	41	31	802	29	68	116	73	50	51	89	[["Metabolism", "Glycan Biosynthesis and Metabolism", "Glycosyltransferases"], ["Metabolism", "Glycan Biosynthesis and Metabolism", "Lipopolysaccharide biosynthesis proteins"], ["Metabolism", "Glycan Biosynthesis and Metabolism", "Lipopolysaccharide biosynthesis"]]
K03274	6578	8494	7458	8564	9437	7539	9909	9171	9576	10104	9025	8927	6968	8131	8512	7070	9119	6422	[["Metabolism", "Glycan Biosynthesis and Metabolism", "Lipopolysaccharide biosynthesis proteins"], ["Metabolism", "Glycan Biosynthesis and Metabolism", "Lipopolysaccharide biosynthesis"]]
K03277	0	0	0	0	0	0	0	0	0	0	0	0	0	0	0	0	0	0	[["Metabolism", "Glycan Biosynthesis and Metabolism", "Glycosyltransferases"], ["Metabolism", "Glycan Biosynthesis and Metabolism", "Lipopolysaccharide biosynthesis proteins"], ["Metabolism", "Glycan Biosynthesis and Metabolism", "Lipopolysaccharide biosynthesis"]]
K03276	0	0	0	47	0	2	1	0	0	2	6	4	0	1	0	0	0	7	[["Metabolism", "Glycan Biosynthesis and Metabolism", "Glycosyltransferases"], ["Metabolism", "Glycan Biosynthesis and Metabolism", "Lipopolysaccharide biosynthesis proteins"], ["Metabolism", "Glycan Biosynthesis and Metabolism", "Lipopolysaccharide biosynthesis"]]
K03271	13565	17363	15767	14210	17180	13527	17418	17409	17541	18705	16074	17701	14379	13849	15745	15361	17981	12691	[["Metabolism", "Glycan Biosynthesis and Metabolism", "Lipopolysaccharide biosynthesis proteins"], ["Metabolism", "Glycan Biosynthesis and Metabolism", "Lipopolysaccharide biosynthesis"]]
K03270	13203	16890	15428	16025	19990	16881	19358	18741	20566	19259	16465	17596	16077	16140	16398	15361	17246	13688	[["Metabolism", "Glycan Biosynthesis and Metabolism", "Lipopolysaccharide biosynthesis proteins"], ["Metabolism", "Glycan Biosynthesis and Metabolism", "Lipopolysaccharide biosynthesis"]]
K03273	8618	10821	9846	9547	11196	8937	11353	11649	12000	11453	10848	11061	8660	9531	10126	9130	10294	8459	[["Metabolism", "Glycan Biosynthesis and Metabolism", "Lipopolysaccharide biosynthesis proteins"], ["Metabolism", "Glycan Biosynthesis and Metabolism", "Lipopolysaccharide biosynthesis"]]
K03272	14080	19174	16777	17882	20516	16605	21167	20907	21347	20864	18822	20249	16534	17767	18044	17065	19356	14067	[["Metabolism", "Glycan Biosynthesis and Metabolism", "Lipopolysaccharide biosynthesis proteins"], ["Metabolism", "Glycan Biosynthesis and Metabolism", "Lipopolysaccharide biosynthesis"]]
K03279	31	783	5	789	30	33	155	61	89	23	845	3	46	772	345	73	260	169	[["Metabolism", "Glycan Biosynthesis and Metabolism", "Glycosyltransferases"], ["Metabolism", "Glycan Biosynthesis and Metabolism", "Lipopolysaccharide biosynthesis proteins"], ["Metabolism", "Glycan Biosynthesis and Metabolism", "Lipopolysaccharide biosynthesis"]]
K03278	0	0	0	0	0	0	0	0	0	0	0	0	0	0	0	0	0	0	[["Metabolism", "Glycan Biosynthesis and Metabolism", "Glycosyltransferases"], ["Metabolism", "Glycan Biosynthesis and Metabolism", "Lipopolysaccharide biosynthesis proteins"], ["Metabolism", "Glycan Biosynthesis and Metabolism", "Lipopolysaccharide biosynthesis"]]
K11022	0	0	0	0	0	0	0	0	0	0	0	0	0	0	0	0	0	0	[["Environmental Information Processing", "Signaling Molecules and Interaction", "Bacterial toxins"]]
K12277	0	0	0	0	0	0	0	0	0	0	0	0	0	0	0	0	0	16	[["Environmental Information Processing", "Membrane Transport", "Secretion system"]]
K12276	230	180	335	112	102	92	43	112	117	138	197	104	65	85	118	183	75	325	[["Environmental Information Processing", "Membrane Transport", "Secretion system"]]
K12270	94	98	43	73	111	60	26	29	64	172	146	58	43	146	27	246	111	93	[["Environmental Information Processing", "Membrane Transport", "Secretion system"]]
K11058	0	0	0	0	0	0	0	0	0	0	0	0	0	0	0	0	0	0	[["Environmental Information Processing", "Signaling Molecules and Interaction", "Bacterial toxins"]]
K12279	218	178	335	113	101	90	41	111	121	138	193	100	63	85	114	186	74	321	[["Environmental Information Processing", "Membrane Transport", "Secretion system"]]
K12278	230	180	335	675	102	92	43	112	118	138	529	105	65	86	118	184	75	325	[["Environmental Information Processing", "Membrane Transport", "Secretion system"]]
K07557	0	0	0	0	0	0	0	0	0	0	0	0	0	0	0	0	0	0	[["Unclassified", "Genetic Information Processing", "Translation proteins"]]
K07550	2	11	15	4	4	15	0	4	3	0	0	5	6	4	12	2	3	2	[["Metabolism", "Xenobiotics Biodegradation and Metabolism", "Toluene degradation"]]
K07552	20690	23146	23465	19095	23647	19285	19874	22241	20697	23060	23151	24161	25436	22335	23710	23513	22200	21738	[["Environmental Information Processing", "Membrane Transport", "Transporters"]]
K06319	1	0	0	0	0	0	2	0	0	0	0	0	1	1	1	0	0	0	[["Unclassified", "Cellular Processes and Signaling", "Sporulation"]]
K09909	33	15	18	128	12	22	9	13	16	53	45	4	7	50	7	18	24	209	[["Unclassified", "Poorly Characterized", "Function unknown"]]
K09908	184	159	162	1617	133	149	60	76	134	220	923	81	91	285	97	131	147	409	[["Unclassified", "Poorly Characterized", "Function unknown"]]
K12051	16	392	1	388	15	16	78	30	44	12	418	2	23	386	172	37	129	80	[["Environmental Information Processing", "Membrane Transport", "Secretion system"]]
K12050	16	392	1	389	15	16	78	30	44	12	419	2	23	386	172	38	129	80	[["Environmental Information Processing", "Membrane Transport", "Secretion system"]]
K12057	2673	3543	3146	3591	3346	2500	2641	3104	3235	3157	3449	3430	3261	3070	3117	2978	2634	4240	[["Environmental Information Processing", "Membrane Transport", "Secretion system"]]
K12056	2601	3339	3098	3512	3104	2315	2416	2839	3097	3061	3404	3362	3176	2988	3084	2908	2600	3656	[["Environmental Information Processing", "Membrane Transport", "Secretion system"]]
K06221	1320	1756	1384	2330	1084	717	1089	915	888	1823	2262	1323	1663	1415	1374	1880	1557	1685	[["Unclassified", "Metabolism", "Others"]]
K09900	96	74	47	1487	53	52	26	27	67	133	837	37	79	271	88	68	90	243	[["Unclassified", "Poorly Characterized", "Function unknown"]]
K09903	22049	25195	23738	21637	26086	22224	23276	24724	24430	26913	24198	25858	25666	24280	25094	24492	25578	22772	[["Metabolism", "Nucleotide Metabolism", "Pyrimidine metabolism"]]
K09902	1138	1262	1194	2753	2537	1770	1076	1074	1053	1594	2358	1913	3659	2019	2123	2044	2057	1900	[["Unclassified", "Poorly Characterized", "Function unknown"]]
K09904	93	75	47	1566	57	70	28	27	58	183	842	33	81	245	88	62	88	272	[["Unclassified", "Poorly Characterized", "Function unknown"]]
K09907	93	75	47	1567	57	70	37	27	58	183	843	33	81	245	88	62	99	272	[["Unclassified", "Poorly Characterized", "Function unknown"]]
K09906	154	121	84	1595	85	87	64	70	107	197	886	70	86	287	106	107	129	333	[["Unclassified", "Poorly Characterized", "Function unknown"]]
K11501	0	0	0	0	0	0	0	0	0	0	0	0	0	0	0	0	0	0	[["Genetic Information Processing", "Replication and Repair", "Chromosome"]]
K03234	0	0	0	0	0	0	0	0	0	0	0	0	0	0	0	0	0	0	[["Genetic Information Processing", "Translation", "Translation factors"]]
K00773	20887	23421	22651	21135	25406	22087	22448	24620	24435	25227	22636	24286	24106	22961	23278	22077	24102	22181	[["Unclassified", "Genetic Information Processing", "Translation proteins"]]
K00772	14469	17421	16661	13118	19876	15066	18026	18484	19035	18464	16409	19265	18110	16218	17593	17146	18280	14352	[["Metabolism", "Amino Acid Metabolism", "Cysteine and methionine metabolism"]]
K00777	305	319	267	115	193	201	217	266	245	170	245	212	130	65	173	302	243	192	[["Unclassified", "Metabolism", "Others"]]
K00776	0	0	1	0	0	0	0	0	0	0	2	0	0	0	0	1	0	0	[["Environmental Information Processing", "Signaling Molecules and Interaction", "Bacterial toxins"]]
K06313	69	48	46	91	52	44	25	8	28	45	90	40	176	101	75	37	36	74	[["Unclassified", "Cellular Processes and Signaling", "Germination"]]
K06315	12	16	12	3	3	1	2	1	3	6	4	3	130	30	42	8	11	6	[["Genetic Information Processing", "Transcription", "Transcription factors"]]
K05574	16	0	10	0	0	0	12	0	0	52	26	0	2	36	0	26	4	284	[["Metabolism", "Energy Metabolism", "Oxidative phosphorylation"]]
K10201	939	1331	1034	688	1045	526	1044	797	715	1337	1170	1251	1495	844	977	1920	1481	738	[["Environmental Information Processing", "Membrane Transport", "ABC transporters"], ["Environmental Information Processing", "Membrane Transport", "Transporters"]]
K07176	0	0	0	0	0	0	0	0	0	0	0	0	0	0	0	0	0	0	[["Unclassified", "Cellular Processes and Signaling", "Signal transduction mechanisms"]]
K07177	4531	5413	4660	2641	3569	2658	3284	3284	2669	6002	4260	5213	5267	4433	5875	5620	5400	3708	[["Unclassified", "Cellular Processes and Signaling", "Signal transduction mechanisms"]]
K07174	0	0	0	0	0	0	0	0	0	0	0	0	0	0	0	0	0	0	[["Unclassified", "Cellular Processes and Signaling", "Signal transduction mechanisms"]]
K07175	7204	8065	7799	6354	7970	6194	5710	7046	6486	7376	7962	7812	9345	6587	7799	8728	8394	6989	[["Unclassified", "Cellular Processes and Signaling", "Signal transduction mechanisms"]]
K07172	3588	5685	4891	4291	6552	5209	7433	6314	7451	7531	5292	6617	5025	5664	5579	5293	5921	4547	[["Unclassified", "Cellular Processes and Signaling", "Signal transduction mechanisms"]]
K07173	1795	1819	994	3809	1470	1746	1008	813	991	1936	2868	988	2376	3766	2744	1993	1738	2234	[["Metabolism", "Amino Acid Metabolism", "Cysteine and methionine metabolism"], ["Human Diseases", "Infectious Diseases", "Vibrio cholerae pathogenic cycle"]]
K07170	7171	8036	7410	8542	9805	8732	8402	7822	8606	9593	9227	9473	10766	10443	8822	8513	8276	8994	[["Unclassified", "Cellular Processes and Signaling", "Signal transduction mechanisms"]]
K07171	11203	13161	12356	12971	12335	10231	11439	11903	11791	14668	14106	14259	12931	13196	12948	12793	14408	12806	[["Unclassified", "Cellular Processes and Signaling", "Signal transduction mechanisms"]]
K07178	3484	3979	4063	2714	5016	3334	3168	3344	3066	3957	4055	4337	6268	3440	4434	5268	4635	3466	[["Metabolism", "Enzyme Families", "Protein kinases"], ["Genetic Information Processing", "Translation", "Ribosome Biogenesis"], ["Genetic Information Processing", "Translation", "Ribosome biogenesis in eukaryotes"]]
K07179	0	0	0	0	0	0	0	0	0	0	0	0	0	0	0	0	0	0	[["Metabolism", "Enzyme Families", "Protein kinases"], ["Genetic Information Processing", "Translation", "Ribosome Biogenesis"], ["Genetic Information Processing", "Translation", "Ribosome biogenesis in eukaryotes"]]
K00195	0	0	0	0	0	0	0	0	0	0	0	0	0	0	0	0	0	0	[["Metabolism", "Xenobiotics Biodegradation and Metabolism", "Nitrotoluene degradation"], ["Metabolism", "Energy Metabolism", "Methane metabolism"]]
K00194	977	1085	1027	732	1186	1050	917	1200	1072	1176	782	1378	626	669	375	918	1981	745	[["Metabolism", "Xenobiotics Biodegradation and Metabolism", "Nitrotoluene degradation"], ["Metabolism", "Energy Metabolism", "Methane metabolism"]]
K00197	1112	1235	1157	857	1316	1176	994	1317	1217	1261	863	1506	728	813	471	1025	2193	791	[["Metabolism", "Xenobiotics Biodegradation and Metabolism", "Nitrotoluene degradation"], ["Metabolism", "Energy Metabolism", "Methane metabolism"]]
K00196	0	0	0	0	0	0	0	0	0	0	0	0	0	0	0	0	0	3	[["Metabolism", "Xenobiotics Biodegradation and Metabolism", "Nitrotoluene degradation"], ["Metabolism", "Energy Metabolism", "Methane metabolism"]]
K00191	0	0	0	0	0	0	0	0	0	0	0	0	0	0	0	0	0	0	[["None"]]
K00190	225	199	168	70	105	96	57	122	155	176	64	181	27	45	56	149	143	222	[["Metabolism", "Energy Metabolism", "Carbon fixation pathways in prokaryotes"], ["Metabolism", "Energy Metabolism", "Methane metabolism"]]
K00193	0	0	0	0	0	0	0	0	0	0	0	0	0	0	0	0	0	0	[["Metabolism", "Xenobiotics Biodegradation and Metabolism", "Nitrotoluene degradation"], ["Metabolism", "Energy Metabolism", "Methane metabolism"]]
K00192	0	0	0	0	0	0	0	0	0	0	0	0	0	0	0	0	0	0	[["Metabolism", "Xenobiotics Biodegradation and Metabolism", "Nitrotoluene degradation"], ["Metabolism", "Energy Metabolism", "Methane metabolism"]]
K00198	566	696	654	869	733	630	491	769	750	891	818	699	370	933	406	618	812	704	[["Metabolism", "Xenobiotics Biodegradation and Metabolism", "Nitrotoluene degradation"], ["Metabolism", "Energy Metabolism", "Methane metabolism"]]
K06405	366	245	254	1580	403	542	235	163	267	648	1074	249	397	937	370	553	446	1007	[["Unclassified", "Cellular Processes and Signaling", "Sporulation"]]
K10109	2237	2239	2231	2207	1983	1707	1769	2123	2272	2401	2044	1838	2181	2122	2217	2297	1893	2202	[["Environmental Information Processing", "Membrane Transport", "ABC transporters"], ["Environmental Information Processing", "Membrane Transport", "Transporters"]]
K10108	1768	1741	1749	2313	1598	1474	1223	1499	1798	1919	1783	1121	1694	1748	1668	2068	1446	2140	[["Environmental Information Processing", "Membrane Transport", "ABC transporters"], ["Cellular Processes", "Cell Motility", "Bacterial chemotaxis"], ["Environmental Information Processing", "Membrane Transport", "Transporters"]]
K10107	3798	4835	4935	3939	5386	4136	4905	5284	5452	4369	4259	5160	4920	4634	4856	4749	4213	4392	[["Environmental Information Processing", "Membrane Transport", "ABC transporters"], ["Environmental Information Processing", "Membrane Transport", "Transporters"]]
K01828	179	141	186	177	205	114	150	115	108	180	232	239	333	296	331	405	226	273	[["Unclassified", "Metabolism", "Others"]]
K01829	898	915	1061	700	1056	707	954	1231	1239	751	553	571	465	320	519	705	757	743	[["Unclassified", "Genetic Information Processing", "Protein folding and associated processing"]]
K01826	2080	1993	2545	2827	2007	1715	1605	1871	1863	2164	2880	2302	2357	1925	2137	2419	2262	2843	[["Metabolism", "Amino Acid Metabolism", "Tyrosine metabolism"], ["Metabolism", "Xenobiotics Biodegradation and Metabolism", "Benzoate degradation"]]
K01825	1809	1618	1887	7328	1984	1394	1454	1972	2333	1733	4141	966	816	1344	1086	1049	1310	2411	[["Metabolism", "Metabolism of Terpenoids and Polyketides", "Limonene and pinene degradation"], ["Metabolism", "Xenobiotics Biodegradation and Metabolism", "Caprolactam degradation"], ["Metabolism", "Carbohydrate Metabolism", "Butanoate metabolism"], ["Metabolism", "Lipid Metabolism", "Fatty acid metabolism"], ["Metabolism", "Metabolism of Terpenoids and Polyketides", "Geraniol degradation"], ["M…
K01822	1694	1788	1909	1066	1786	1292	1182	1670	1424	1661	1800	1747	1804	1817	2061	1562	1514	1976	[["Metabolism", "Lipid Metabolism", "Steroid hormone biosynthesis"]]
K01823	5392	6267	5878	5641	5837	4397	4823	5545	5098	5511	5604	5337	6537	5113	6323	6717	5477	4684	[["Metabolism", "Metabolism of Terpenoids and Polyketides", "Terpenoid backbone biosynthesis"]]
K01820	598	645	571	370	609	545	297	448	475	469	507	615	1202	557	862	876	556	465	[["Metabolism", "Carbohydrate Metabolism", "Pentose and glucuronate interconversions"], ["Metabolism", "Metabolism of Terpenoids and Polyketides", "Biosynthesis of ansamycins"]]
K01821	12498	15440	14954	11266	15831	12205	15546	15832	16392	15516	14694	15823	14327	14721	15178	14393	14442	12997	[["Metabolism", "Xenobiotics Biodegradation and Metabolism", "Dioxin degradation"], ["Metabolism", "Xenobiotics Biodegradation and Metabolism", "Benzoate degradation"]]
K00999	368	486	354	167	358	136	206	249	157	404	411	413	428	459	638	411	386	314	[["Metabolism", "Carbohydrate Metabolism", "Inositol phosphate metabolism"], ["Environmental Information Processing", "Signal Transduction", "Phosphatidylinositol signaling system"], ["Metabolism", "Lipid Metabolism", "Glycerophospholipid metabolism"]]
K00998	19906	22690	22238	20258	26138	21725	22118	23733	23764	24019	22905	24066	25169	22019	22524	23122	23985	20849	[["Metabolism", "Lipid Metabolism", "Glycerophospholipid metabolism"], ["Metabolism", "Amino Acid Metabolism", "Glycine, serine and threonine metabolism"]]
K00995	39371	49079	45218	37843	48799	39061	46965	47528	47241	55789	45252	52150	46901	43994	48190	47617	51882	39463	[["Metabolism", "Lipid Metabolism", "Glycerophospholipid metabolism"]]
K00997	15579	19091	17309	15327	18594	14622	17844	18327	18600	20397	18260	19995	17600	17699	18924	17130	19121	16333	[["Metabolism", "Metabolism of Cofactors and Vitamins", "Pantothenate and CoA biosynthesis"]]
K00996	213	289	305	321	305	166	167	187	257	402	255	292	271	352	334	404	260	546	[["Metabolism", "Glycan Biosynthesis and Metabolism", "Lipopolysaccharide biosynthesis proteins"]]
K00991	15893	17723	17010	16548	19050	17053	16802	17656	17303	21139	17606	18469	19005	18184	18752	18618	18984	16620	[["Metabolism", "Metabolism of Terpenoids and Polyketides", "Terpenoid backbone biosynthesis"]]
K00990	14823	18011	17409	14776	20128	15153	18169	18792	19119	18909	17769	19296	19482	17058	18458	17952	17921	15104	[["Environmental Information Processing", "Signal Transduction", "Two-component system"]]
K00992	805	630	777	451	822	601	413	580	604	624	846	805	582	549	855	841	731	604	[["Unclassified", "Metabolism", "Others"]]
K11028	78	1958	5	1941	75	82	388	152	222	58	2091	8	115	1928	862	184	645	398	[["Environmental Information Processing", "Membrane Transport", "Secretion system"], ["Environmental Information Processing", "Signaling Molecules and Interaction", "Bacterial toxins"], ["Environmental Information Processing", "Membrane Transport", "Bacterial secretion system"]]
K02622	12121	11860	12523	11409	14031	12572	10941	12908	12479	11399	12082	12149	14627	12490	12592	12263	11781	12878	[["Genetic Information Processing", "Replication and Repair", "Chromosome"], ["Genetic Information Processing", "Replication and Repair", "DNA replication proteins"]]
K02625	28	5	3	2	12	6	0	0	9	4	1	1	0	0	1	2	11	3	[["Environmental Information Processing", "Membrane Transport", "Transporters"]]
K03564	28744	34022	32178	26994	35701	28796	33510	34514	35137	38309	31937	35494	33475	31821	34406	32432	33805	29315	[["Unclassified", "Genetic Information Processing", "Protein folding and associated processing"]]
K13489	151	118	219	80	118	119	31	70	87	100	210	97	165	195	135	110	99	297	[["Environmental Information Processing", "Signal Transduction", "Two-component system"]]
K13488	151	118	219	80	118	119	31	70	87	100	210	97	165	195	135	110	99	297	[["Environmental Information Processing", "Signal Transduction", "Two-component system"]]
K13483	12502	13456	13159	9931	15364	11734	14656	14399	15053	15791	14943	15903	14259	15394	14119	13890	13985	11936	[["Metabolism", "Nucleotide Metabolism", "Purine metabolism"]]
K13482	2507	2500	2639	1425	2359	1752	1682	2185	2003	2022	2442	2318	2690	2207	2677	2322	2083	2446	[["Metabolism", "Nucleotide Metabolism", "Purine metabolism"]]
K13481	2478	2455	2596	1409	2316	1692	1634	2132	1943	2007	2424	2298	2656	2202	2661	2294	2043	2410	[["Metabolism", "Nucleotide Metabolism", "Purine metabolism"]]
K13480	0	1	2	36	0	12	0	0	0	1	15	0	0	1	0	0	0	9	[["Metabolism", "Nucleotide Metabolism", "Purine metabolism"]]
K13487	72	68	104	36	84	82	12	34	35	75	105	63	121	157	80	42	42	203	[["Environmental Information Processing", "Signal Transduction", "Two-component system"]]
K13486	151	118	219	80	118	119	31	70	87	100	210	97	165	195	135	110	99	297	[["Environmental Information Processing", "Signal Transduction", "Two-component system"]]
K14680	19	27	14	14	13	15	6	6	10	14	31	30	46	39	57	162	12	17	[["None"]]
K14681	0	0	0	0	1	0	0	0	0	0	0	0	0	0	0	0	0	20	[["None"]]
K14682	3559	3335	3889	3614	3622	3023	2732	4185	3836	2965	3442	2921	3033	2363	3028	3082	3347	3970	[["None"]]
K08358	248	163	212	2660	142	173	126	206	245	285	1520	139	142	244	179	120	214	201	[["Environmental Information Processing", "Signal Transduction", "Two-component system"]]
K08357	186	84	101	2032	125	141	30	101	99	206	1135	59	112	224	100	73	98	230	[["Environmental Information Processing", "Signal Transduction", "Two-component system"]]
K08356	35	24	111	22	24	15	8	15	23	21	20	14	16	14	11	24	20	47	[["Unclassified", "Cellular Processes and Signaling", "Electron transfer carriers"]]
K08355	35	24	111	22	24	15	8	15	23	21	20	14	16	14	11	24	20	47	[["Unclassified", "Cellular Processes and Signaling", "Electron transfer carriers"]]
K03469	21918	24805	23659	21529	25937	22442	23015	24669	24369	26359	24124	25522	25671	24200	24959	23755	25032	22928	[["Genetic Information Processing", "Replication and Repair", "DNA replication"], ["Genetic Information Processing", "Replication and Repair", "DNA replication proteins"]]
K03462	7	12	15	4	2	9	3	2	11	3	4	6	17	0	0	9	2	19	[["Metabolism", "Metabolism of Cofactors and Vitamins", "Nicotinate and nicotinamide metabolism"]]
K03464	1141	1269	1560	901	1259	761	899	1132	1158	1209	1187	1269	1492	1091	1574	1373	1245	1335	[["Metabolism", "Xenobiotics Biodegradation and Metabolism", "Benzoate degradation"]]
K03465	3402	4288	3307	3533	3031	2583	2859	3148	2729	3727	4090	3689	3508	3231	3121	4365	4626	3590	[["Metabolism", "Metabolism of Cofactors and Vitamins", "One carbon pool by folate"], ["Metabolism", "Nucleotide Metabolism", "Pyrimidine metabolism"]]
K03466	31032	36655	33978	27375	33972	27607	30865	31872	30371	39197	34155	36974	37828	32606	36423	39223	37260	29682	[["Genetic Information Processing", "Replication and Repair", "Chromosome"]]
K01648	708	621	633	518	768	806	556	692	615	678	504	908	501	280	211	558	1483	644	[["Metabolism", "Carbohydrate Metabolism", "Citrate cycle (TCA cycle)"], ["Metabolism", "Energy Metabolism", "Carbon fixation pathways in prokaryotes"]]
K01649	31438	35849	34651	28931	35916	29402	32117	35216	34085	37816	32710	36915	34971	31673	35483	35015	36594	30006	[["Metabolism", "Carbohydrate Metabolism", "Pyruvate metabolism"], ["Metabolism", "Amino Acid Metabolism", "Valine, leucine and isoleucine biosynthesis"]]
K01643	3042	4601	3949	6302	5309	4517	6285	4989	5907	6038	5695	4823	4031	5319	4511	3825	4794	3901	[["Metabolism", "Carbohydrate Metabolism", "Citrate cycle (TCA cycle)"], ["Environmental Information Processing", "Signal Transduction", "Two-component system"]]
K01640	17322	20432	20283	13967	21737	16513	19292	20143	19258	23317	18526	21990	21559	17867	22181	20555	21326	15654	[["Metabolism", "Metabolism of Terpenoids and Polyketides", "Geraniol degradation"], ["Cellular Processes", "Transport and Catabolism", "Peroxisome"], ["Metabolism", "Lipid Metabolism", "Synthesis and degradation of ketone bodies"], ["Metabolism", "Carbohydrate Metabolism", "Butanoate metabolism"], ["Metabolism", "Amino Acid Metabolism", "Valine, leucine and isoleucine degradation"]]
K01641	1526	1322	1597	1071	1765	1157	1388	1875	2110	1180	758	808	692	653	1037	1105	873	1034	[["Metabolism", "Metabolism of Terpenoids and Polyketides", "Terpenoid backbone biosynthesis"], ["Metabolism", "Lipid Metabolism", "Synthesis and degradation of ketone bodies"], ["Metabolism", "Carbohydrate Metabolism", "Butanoate metabolism"], ["Metabolism", "Amino Acid Metabolism", "Valine, leucine and isoleucine degradation"]]
K01646	293	174	164	409	111	507	122	115	139	312	250	90	171	434	247	145	191	515	[["Metabolism", "Carbohydrate Metabolism", "Citrate cycle (TCA cycle)"], ["Environmental Information Processing", "Signal Transduction", "Two-component system"]]
K01647	31405	37061	34914	28633	36931	28975	33238	34840	34069	38772	33956	37361	37266	33574	37498	36464	35709	29853	[["Metabolism", "Carbohydrate Metabolism", "Citrate cycle (TCA cycle)"], ["Metabolism", "Carbohydrate Metabolism", "Glyoxylate and dicarboxylate metabolism"]]
K01644	43101	48951	47973	35606	45937	35348	41859	44592	42158	49577	47651	50998	48396	46845	51164	47941	45671	40029	[["Metabolism", "Carbohydrate Metabolism", "Citrate cycle (TCA cycle)"], ["Environmental Information Processing", "Signal Transduction", "Two-component system"]]
K02597	3091	3142	3552	2521	2853	2425	2800	3532	3068	3011	3034	2995	2550	2538	2794	2718	2989	2572	[["Metabolism", "Energy Metabolism", "Nitrogen metabolism"]]
K02626	2911	4802	4143	3639	5720	4372	6641	5519	6337	6843	4528	5577	4091	4768	4646	4071	5154	3219	[["Metabolism", "Amino Acid Metabolism", "Arginine and proline metabolism"]]
K02595	1070	1192	1410	816	1145	919	1054	1111	991	1247	1190	1380	1156	1388	1460	1413	1261	993	[["Metabolism", "Energy Metabolism", "Nitrogen metabolism"]]
K02594	1305	1224	1441	1600	1327	1234	961	1056	1035	1364	1487	1578	1016	1151	1112	1398	2083	1117	[["Metabolism", "Energy Metabolism", "Nitrogen metabolism"]]
K02593	869	994	1184	1302	908	786	963	1011	884	1138	1351	1067	939	1146	1068	956	1082	934	[["Metabolism", "Energy Metabolism", "Nitrogen metabolism"]]
K02592	1430	1733	1849	1738	1564	1321	1474	1681	1552	1797	1865	1877	1394	1695	1705	1725	1830	1293	[["Metabolism", "Energy Metabolism", "Nitrogen metabolism"]]
K02591	6123	7254	7705	6032	7510	6273	6784	8032	7687	7144	6415	8100	6892	6378	6446	6943	7607	6566	[["Metabolism", "Xenobiotics Biodegradation and Metabolism", "Chloroalkane and chloroalkene degradation"], ["Metabolism", "Energy Metabolism", "Nitrogen metabolism"]]
K02590	790	687	740	1000	870	1030	646	742	722	800	673	948	598	458	302	654	1551	897	[["Metabolism", "Energy Metabolism", "Nitrogen metabolism"]]
K02598	55	86	101	338	240	155	70	50	56	413	329	127	295	567	263	197	176	496	[["Unclassified", "Cellular Processes and Signaling", "Other ion-coupled transporters"]]
K02849	850	785	701	2122	795	1064	603	720	661	939	1411	990	617	683	836	680	1568	899	[["Metabolism", "Glycan Biosynthesis and Metabolism", "Glycosyltransferases"], ["Metabolism", "Glycan Biosynthesis and Metabolism", "Lipopolysaccharide biosynthesis proteins"], ["Metabolism", "Glycan Biosynthesis and Metabolism", "Lipopolysaccharide biosynthesis"]]
K14061	284	150	111	4367	154	169	58	71	120	237	2385	86	189	472	224	138	177	442	[["Unclassified", "Cellular Processes and Signaling", "Signal transduction mechanisms"]]
K14062	89	76	42	1609	58	72	28	27	50	232	825	34	76	216	87	54	75	231	[["Unclassified", "Cellular Processes and Signaling", "Pores ion channels"]]
K14063	3	21	4	136	9	18	10	1	9	152	40	1	8	85	14	2	23	91	[["Genetic Information Processing", "Transcription", "Transcription factors"]]
K14064	3	22	7	150	9	18	10	1	10	152	50	1	8	86	14	2	25	101	[["Unclassified", "Cellular Processes and Signaling", "Signal transduction mechanisms"]]
K14065	0	0	2	37	0	0	0	0	0	1	15	0	0	1	0	0	0	9	[["Unclassified", "Cellular Processes and Signaling", "Signal transduction mechanisms"]]
K14067	292	370	412	218	308	308	191	276	278	278	406	474	545	504	322	478	338	357	[["Metabolism", "Carbohydrate Metabolism", "Glyoxylate and dicarboxylate metabolism"], ["Metabolism", "Energy Metabolism", "Methane metabolism"]]
K02841	5853	7980	7142	7233	8426	7075	9276	8690	9472	9262	8069	8404	6410	7142	7102	6798	8834	6027	[["Metabolism", "Glycan Biosynthesis and Metabolism", "Glycosyltransferases"], ["Metabolism", "Glycan Biosynthesis and Metabolism", "Lipopolysaccharide biosynthesis proteins"], ["Metabolism", "Glycan Biosynthesis and Metabolism", "Lipopolysaccharide biosynthesis"]]
K02840	104	24	10	39	30	123	27	24	12	18	41	16	59	69	48	79	28	245	[["Metabolism", "Glycan Biosynthesis and Metabolism", "Glycosyltransferases"], ["Metabolism", "Glycan Biosynthesis and Metabolism", "Lipopolysaccharide biosynthesis proteins"], ["Metabolism", "Glycan Biosynthesis and Metabolism", "Lipopolysaccharide biosynthesis"]]
K02843	11441	13865	12459	12077	14085	11908	14196	14984	15235	14446	12753	14611	10314	10541	11060	11617	15998	10192	[["Metabolism", "Glycan Biosynthesis and Metabolism", "Glycosyltransferases"], ["Metabolism", "Glycan Biosynthesis and Metabolism", "Lipopolysaccharide biosynthesis proteins"], ["Metabolism", "Glycan Biosynthesis and Metabolism", "Lipopolysaccharide biosynthesis"]]
K02844	968	807	961	2772	916	964	619	747	723	1034	1892	1074	717	664	614	769	1728	1138	[["Metabolism", "Glycan Biosynthesis and Metabolism", "Glycosyltransferases"], ["Metabolism", "Glycan Biosynthesis and Metabolism", "Lipopolysaccharide biosynthesis proteins"], ["Metabolism", "Glycan Biosynthesis and Metabolism", "Lipopolysaccharide biosynthesis"]]
K02847	86	53	40	1535	50	70	20	26	41	81	817	29	69	134	73	52	54	141	[["Metabolism", "Glycan Biosynthesis and Metabolism", "Lipopolysaccharide biosynthesis proteins"], ["Metabolism", "Glycan Biosynthesis and Metabolism", "Lipopolysaccharide biosynthesis"]]
K02846	3	23	8	152	9	18	10	1	10	152	50	1	8	87	14	2	25	106	[["Unclassified", "Metabolism", "Amino acid metabolism"]]
K02102	9	10	11	3	128	0	6	2	1	4	58	37	127	160	35	1	4	5	[["Unclassified", "Metabolism", "Energy metabolism"]]
K09758	146	154	171	287	198	193	128	109	176	200	222	214	238	383	310	390	224	431	[["Metabolism", "Amino Acid Metabolism", "Cysteine and methionine metabolism"], ["Metabolism", "Amino Acid Metabolism", "Alanine, aspartate and glutamate metabolism"]]
K06039	1164	1093	1043	2233	1004	948	715	884	797	1316	1768	1310	974	1123	1183	1048	1909	1215	[["Unclassified", "Cellular Processes and Signaling", "Inorganic ion transport and metabolism"]]
K06034	132	146	130	111	146	90	122	141	102	126	120	160	135	133	205	219	131	185	[["Metabolism", "Energy Metabolism", "Methane metabolism"]]
K06036	116	45	65	49	64	73	51	33	62	111	119	86	49	59	70	108	128	132	[["Unclassified", "Metabolism", "Others"]]
K06037	0	0	0	0	0	0	0	0	0	0	0	0	0	0	0	0	0	0	[["Unclassified", "Metabolism", "Others"]]
K06032	0	0	0	0	0	0	0	0	0	0	0	0	0	0	0	0	0	0	[["Unclassified", "Metabolism", "Others"]]
K01581	7642	7992	8028	7465	8240	7136	7037	7895	7527	7353	8402	8922	9024	8452	7943	7844	7889	7770	[["Metabolism", "Metabolism of Other Amino Acids", "Glutathione metabolism"], ["Metabolism", "Amino Acid Metabolism", "Arginine and proline metabolism"]]
K02702	16	0	10	0	0	0	12	0	0	52	26	0	2	36	0	26	4	284	[["Metabolism", "Energy Metabolism", "Photosynthesis proteins"], ["Metabolism", "Energy Metabolism", "Photosynthesis"]]
K02659	3481	3327	3772	2545	4909	3547	2939	3689	3470	3335	3520	3823	5321	3158	3700	3888	4007	4495	[["Environmental Information Processing", "Membrane Transport", "Secretion system"], ["Cellular Processes", "Cell Motility", "Bacterial motility proteins"], ["Environmental Information Processing", "Signal Transduction", "Two-component system"]]
K13490	214	178	262	126	192	164	131	218	247	179	224	170	227	214	202	169	145	323	[["Metabolism", "Enzyme Families", "Protein kinases"], ["Environmental Information Processing", "Signal Transduction", "Two-component system"]]
K13491	151	118	219	80	118	119	31	70	87	100	210	97	165	195	135	110	99	297	[["Environmental Information Processing", "Signal Transduction", "Two-component system"]]
K03644	19978	23167	22041	17745	24348	19476	21710	22692	22588	25064	21474	24555	24709	21302	23743	22542	23746	20271	[["Metabolism", "Metabolism of Cofactors and Vitamins", "Lipoic acid metabolism"]]
K03645	93	75	47	1547	57	68	36	27	58	181	843	29	81	245	88	62	99	265	[["Genetic Information Processing", "Replication and Repair", "Chromosome"], ["Genetic Information Processing", "Replication and Repair", "DNA replication proteins"]]
K03646	5014	4852	5313	5270	6543	5311	4331	5253	4896	5096	5715	5757	6905	4658	5237	5439	6671	5647	[["Unclassified", "Cellular Processes and Signaling", "Pores ion channels"]]
K03647	746	732	609	1958	514	498	285	345	343	662	1450	426	1332	1299	835	592	616	1087	[["Unclassified", "Metabolism", "Nucleotide metabolism"]]
K03640	17716	20104	19774	17109	23443	18862	20428	22422	22983	20819	18710	21215	20147	18328	18699	18706	21150	18029	[["Unclassified", "Cellular Processes and Signaling", "Membrane and intracellular structural molecules"]]
K03641	14465	17416	16681	14531	20165	15815	17706	19025	19479	17774	16571	18520	18114	16198	16674	16389	17830	15498	[["Unclassified", "Cellular Processes and Signaling", "Cell motility and secretion"]]
K03642	21806	26525	25302	22110	29794	24196	28198	28588	29407	29101	25787	28513	26464	25828	26762	25371	27333	22353	[["Unclassified", "Cellular Processes and Signaling", "Membrane and intracellular structural molecules"]]
K03643	8768	9100	9528	8320	11010	8409	8339	9485	9200	8528	9836	10067	11400	9751	10321	9293	8998	9506	[["Unclassified", "Cellular Processes and Signaling", "Pores ion channels"]]
K03648	14249	15084	14376	13349	14557	12838	11624	13262	12673	15674	15036	14580	16923	15190	15480	15189	15183	15448	[["Genetic Information Processing", "Replication and Repair", "Base excision repair"], ["Genetic Information Processing", "Replication and Repair", "DNA repair and recombination proteins"], ["Human Diseases", "Immune System Diseases", "Primary immunodeficiency"]]
K03649	2987	4838	3863	3143	4752	3366	4986	3938	4407	6005	4451	5242	5712	5201	5743	5631	5161	3495	[["Genetic Information Processing", "Replication and Repair", "Base excision repair"], ["Genetic Information Processing", "Replication and Repair", "DNA repair and recombination proteins"]]
K06694	0	0	0	0	0	0	0	0	0	0	0	0	0	0	0	0	0	0	[["None"]]
K11814	9	9	11	0	1	0	2	0	0	0	0	0	125	26	35	0	0	0	[["Unclassified", "Cellular Processes and Signaling", "Other ion-coupled transporters"]]
K12428	435	374	426	241	343	249	258	317	216	765	623	543	424	372	421	708	474	366	[["Metabolism", "Lipid Metabolism", "Lipid biosynthesis proteins"]]
K12429	920	1190	1120	776	1026	658	1059	1063	1079	1067	1145	920	984	628	996	1403	970	625	[["Metabolism", "Lipid Metabolism", "Lipid biosynthesis proteins"]]
K12422	10	12	9	18	10	4	4	5	5	16	16	15	24	8	22	18	22	7	[["Metabolism", "Lipid Metabolism", "Lipid biosynthesis proteins"]]
K12423	34	61	53	62	40	24	43	50	46	98	230	76	77	130	97	58	86	84	[["Metabolism", "Lipid Metabolism", "Lipid biosynthesis proteins"]]
K12420	120	70	56	46	71	53	36	33	18	97	130	140	104	83	158	277	115	41	[["Metabolism", "Metabolism of Terpenoids and Polyketides", "Biosynthesis of type II polyketide backbone"], ["Metabolism", "Lipid Metabolism", "Lipid biosynthesis proteins"]]
K12421	52	93	70	96	55	41	74	68	86	152	307	114	122	176	139	80	120	119	[["Metabolism", "Lipid Metabolism", "Lipid biosynthesis proteins"]]
K12426	24	36	19	46	38	18	16	20	27	58	90	46	64	40	84	48	54	34	[["Metabolism", "Lipid Metabolism", "Lipid biosynthesis proteins"]]
K12427	18	24	21	36	12	8	30	14	22	38	60	30	36	26	30	30	28	16	[["Metabolism", "Lipid Metabolism", "Lipid biosynthesis proteins"]]
K12424	10	12	9	18	10	4	4	5	5	16	16	15	24	8	22	18	22	7	[["Metabolism", "Lipid Metabolism", "Lipid biosynthesis proteins"]]
K12425	0	0	0	0	0	0	0	0	0	0	0	0	0	0	0	0	0	0	[["Metabolism", "Lipid Metabolism", "Lipid biosynthesis proteins"]]
K07349	199	160	86	3095	118	127	61	56	108	416	1657	69	158	522	202	101	168	491	[["Environmental Information Processing", "Membrane Transport", "Secretion system"], ["Cellular Processes", "Cell Motility", "Bacterial motility proteins"]]
K07348	124	80	45	1602	67	70	28	27	50	231	835	30	76	243	87	54	75	285	[["Environmental Information Processing", "Membrane Transport", "Secretion system"], ["Cellular Processes", "Cell Motility", "Bacterial motility proteins"]]
K05380	0	0	0	0	0	0	0	0	0	0	0	0	0	0	0	0	0	0	[["Metabolism", "Energy Metabolism", "Photosynthesis proteins"], ["Metabolism", "Energy Metabolism", "Photosynthesis - antenna proteins"]]
K07345	1630	1540	1444	10395	2918	2105	1170	1139	1238	2340	6429	2170	4308	3118	2674	2334	2492	2870	[["Environmental Information Processing", "Membrane Transport", "Secretion system"], ["Cellular Processes", "Cell Motility", "Bacterial motility proteins"], ["Human Diseases", "Infectious Diseases", "Pertussis"]]
K07344	4417	5403	5634	4151	5756	4416	5085	5263	5382	4929	4928	5904	5963	5837	6391	5530	4520	5365	[["Environmental Information Processing", "Membrane Transport", "Secretion system"]]
K07347	2158	2221	2259	11075	3667	2780	1554	1777	1773	3268	7100	2656	4686	3804	3258	2882	2957	3798	[["Environmental Information Processing", "Membrane Transport", "Secretion system"], ["Cellular Processes", "Cell Motility", "Bacterial motility proteins"], ["Human Diseases", "Infectious Diseases", "Pertussis"]]
K07346	1758	1817	1810	6157	3357	2441	1380	1610	1514	2290	4443	2406	4331	2854	2884	2566	2509	2715	[["Genetic Information Processing", "Folding, Sorting and Degradation", "Chaperones and folding catalysts"], ["Environmental Information Processing", "Membrane Transport", "Secretion system"], ["Cellular Processes", "Cell Motility", "Bacterial motility proteins"]]
K07341	5616	7714	6919	6872	7674	6150	7946	7154	7718	8365	7703	7993	6733	7546	7966	6821	7470	5818	[["Unclassified", "Cellular Processes and Signaling", "Cell motility and secretion"]]
K07340	4768	5034	4981	5697	6919	5415	4655	5362	4683	4747	5709	5798	7482	5786	6697	5811	5399	4821	[["Unclassified", "Cellular Processes and Signaling", "Cell motility and secretion"]]
K07343	3028	2436	2859	3500	2246	1973	2019	2333	2256	2486	3719	2341	2794	3061	2247	2593	2462	3164	[["Unclassified", "Cellular Processes and Signaling", "Cell motility and secretion"]]
K07342	0	0	0	0	0	0	0	0	0	0	0	0	0	0	0	0	0	0	[["Environmental Information Processing", "Membrane Transport", "Secretion system"], ["Cellular Processes", "Transport and Catabolism", "Phagosome"], ["Genetic Information Processing", "Folding, Sorting and Degradation", "Protein export"], ["Genetic Information Processing", "Folding, Sorting and Degradation", "Protein processing in endoplasmic reticulum"], ["Human Diseases", "Infectious Diseases"…
K06968	1199	1226	1360	2828	2366	1843	1214	1128	1075	1554	2418	1971	2733	1807	1649	1919	1871	1779	[["Genetic Information Processing", "Translation", "Ribosome Biogenesis"]]
K06969	19521	21069	21397	19168	24200	21533	20958	24003	24501	22665	19791	21457	21119	19522	18977	19873	21514	20837	[["Genetic Information Processing", "Translation", "Ribosome Biogenesis"]]
K06962	903	869	761	694	911	938	664	806	722	940	756	1092	830	784	475	797	1696	1330	[["Unclassified", "Poorly Characterized", "General function prediction only"]]
K06963	0	0	0	0	0	0	0	0	0	0	0	0	0	0	0	0	0	0	[["Unclassified", "Poorly Characterized", "General function prediction only"]]
K06960	10344	13650	11688	11034	13114	10685	13063	12644	13145	16938	13062	14751	11913	12571	13804	13297	14708	10183	[["Unclassified", "Poorly Characterized", "General function prediction only"]]
K06961	0	0	0	0	0	0	0	0	0	0	0	0	0	0	0	0	0	0	[["Genetic Information Processing", "Translation", "Ribosome Biogenesis"]]
K06966	36363	42200	40752	34315	46199	36443	40908	43132	43115	44905	40199	44903	45166	39105	42082	41589	43723	36553	[["Unclassified", "Poorly Characterized", "General function prediction only"]]
K06967	613	461	401	1772	600	860	391	299	372	927	1318	389	709	1341	551	801	626	1471	[["Unclassified", "Poorly Characterized", "General function prediction only"]]
K06964	0	0	0	0	0	0	0	0	0	0	0	0	0	0	0	0	0	0	[["Unclassified", "Poorly Characterized", "General function prediction only"]]
K06965	0	0	0	0	0	0	0	0	0	0	0	0	0	0	0	0	0	0	[["Genetic Information Processing", "Translation", "mRNA surveillance pathway"]]
K08995	13711	18297	17357	13427	20836	15827	20667	19478	20852	21095	17563	21448	19661	19037	18841	18390	18457	15897	[["Unclassified", "Poorly Characterized", "Function unknown"]]
K08994	8641	10249	9947	8937	11642	8771	11138	11332	12482	11899	10509	10779	9887	9918	9640	9356	9747	10025	[["Unclassified", "Poorly Characterized", "Function unknown"]]
K08997	31	27	17	159	29	23	18	18	16	154	57	1	12	100	22	16	32	172	[["Unclassified", "Poorly Characterized", "Function unknown"]]
K08996	229	240	162	1597	265	255	81	151	158	271	932	235	254	468	356	289	235	289	[["Unclassified", "Poorly Characterized", "Function unknown"]]
K08990	1887	2204	2349	3489	2684	2302	2410	2490	2282	2101	2972	2409	2983	2829	3074	2557	2130	1887	[["Unclassified", "Poorly Characterized", "Function unknown"]]
K08993	157	193	132	1629	109	138	38	72	84	207	915	77	90	285	90	122	105	392	[["Unclassified", "Poorly Characterized", "Function unknown"]]
K08992	179	153	159	1618	166	185	85	128	129	237	924	210	273	324	187	135	213	522	[["Unclassified", "Poorly Characterized", "Function unknown"]]
K08999	10904	13587	12323	9833	13200	10823	13539	13057	13212	16399	11754	14907	11733	11271	12544	12996	15595	9784	[["Unclassified", "Poorly Characterized", "Function unknown"]]
K08998	20842	23386	22456	19993	24822	20862	22216	23492	23390	25665	22602	24733	24848	22602	23780	22942	24242	20846	[["Unclassified", "Poorly Characterized", "Function unknown"]]
K08344	644	659	669	1839	564	470	586	724	558	801	1342	767	497	762	782	566	607	534	[["Unclassified", "Cellular Processes and Signaling", "Electron transfer carriers"]]
K08345	3	22	6	150	9	18	10	1	10	152	47	1	8	86	14	2	25	101	[["Metabolism", "Energy Metabolism", "Nitrogen metabolism"]]
K08346	3	22	6	125	9	18	10	1	9	151	41	1	8	85	14	2	24	101	[["Metabolism", "Energy Metabolism", "Nitrogen metabolism"]]
K14940	0	1	0	0	0	3	0	0	0	0	0	0	0	0	0	0	0	11	[["None"]]
K02724	16	0	10	0	0	0	12	0	0	52	26	0	2	36	0	26	4	284	[["Metabolism", "Energy Metabolism", "Photosynthesis proteins"], ["Metabolism", "Energy Metabolism", "Photosynthesis"]]
K08349	12	22	6	175	12	20	11	1	9	153	47	5	8	86	27	2	25	111	[["Metabolism", "Carbohydrate Metabolism", "Glyoxylate and dicarboxylate metabolism"], ["Metabolism", "Energy Metabolism", "Methane metabolism"], ["Environmental Information Processing", "Signal Transduction", "Two-component system"]]
K11815	9	9	11	0	1	0	2	0	0	0	0	0	125	26	35	0	0	0	[["Unclassified", "Cellular Processes and Signaling", "Other ion-coupled transporters"]]
K05929	34	30	30	12	12	8	11	14	20	47	46	58	44	29	23	43	18	17	[["Metabolism", "Lipid Metabolism", "Glycerophospholipid metabolism"]]
K05928	115	126	251	58	53	56	81	56	73	166	125	122	86	106	90	221	86	433	[["Metabolism", "Metabolism of Cofactors and Vitamins", "Ubiquinone and other terpenoid-quinone biosynthesis"]]
K05927	89	497	44	472	39	39	100	77	79	90	521	96	33	488	216	213	174	194	[["Unclassified", "Metabolism", "Energy metabolism"]]
K05924	0	0	0	0	0	0	0	0	0	0	0	0	0	0	0	0	0	0	[["Unclassified", "Metabolism", "Others"]]
K05922	69	499	58	488	41	44	100	68	82	109	505	94	54	489	246	216	213	194	[["Unclassified", "Metabolism", "Energy metabolism"]]
K05921	4334	5331	5308	6987	6890	4442	4268	4557	4976	5713	6723	6354	8890	6028	6398	6206	5664	6226	[["Metabolism", "Amino Acid Metabolism", "Tyrosine metabolism"]]
K00349	1375	836	878	3610	864	2272	828	694	836	1394	2157	767	1110	1914	1398	1045	1002	1640	[["Unclassified", "Metabolism", "Energy metabolism"]]
K00698	30	39	64	16	26	19	16	28	16	38	36	51	47	38	94	60	33	12	[["Metabolism", "Carbohydrate Metabolism", "Amino sugar and nucleotide sugar metabolism"], ["Metabolism", "Glycan Biosynthesis and Metabolism", "Glycosyltransferases"]]
K00340	26762	32495	30522	25105	33927	27637	32093	33177	33215	34628	28967	33662	31794	28378	30366	31141	33941	26184	[["Metabolism", "Energy Metabolism", "Oxidative phosphorylation"]]
K00341	26768	32499	30538	25137	33968	27690	32107	33178	33220	34657	29011	33790	31931	28421	30418	31166	33929	26214	[["Metabolism", "Energy Metabolism", "Oxidative phosphorylation"]]
K00690	416	351	163	753	300	428	269	231	198	427	392	134	189	428	186	450	276	714	[["Metabolism", "Carbohydrate Metabolism", "Starch and sucrose metabolism"]]
K00343	26812	32593	30603	25139	33998	27688	32139	33221	33263	34669	29065	33781	31898	28480	30498	31231	34027	26246	[["Metabolism", "Energy Metabolism", "Oxidative phosphorylation"]]
K00344	43927	51928	50921	35244	51770	39130	48036	49916	47416	57795	46819	55585	51033	45286	55367	52362	51935	40113	[["Unclassified", "Metabolism", "Energy metabolism"]]
K00697	12974	14667	14255	9771	14353	10967	11880	12697	11806	14710	13482	15921	15759	13595	15292	15871	15058	11918	[["Metabolism", "Glycan Biosynthesis and Metabolism", "Glycosyltransferases"], ["Metabolism", "Carbohydrate Metabolism", "Starch and sucrose metabolism"]]
K00346	1368	827	878	3608	848	2236	816	693	820	1383	2148	764	1090	1914	1374	1045	988	1637	[["Unclassified", "Metabolism", "Energy metabolism"]]
K00347	1371	833	878	3608	848	2243	816	693	826	1394	2157	767	1110	1914	1398	1045	1002	1645	[["Unclassified", "Metabolism", "Energy metabolism"]]
K09116	111	146	90	417	57	184	54	98	86	47	158	74	26	161	71	111	97	208	[["Unclassified", "Poorly Characterized", "Function unknown"]]
K09117	19454	22609	21944	17591	23982	19699	21568	22944	22730	24637	21204	24023	23907	21224	23292	22697	22880	19928	[["Unclassified", "Poorly Characterized", "Function unknown"]]
K05337	12880	16080	14549	9966	12367	9281	11479	12665	11424	17177	13982	16227	14942	12776	15622	16531	16485	12357	[["Unclassified", "Metabolism", "Energy metabolism"]]
K09118	4373	5298	4638	2632	3561	2512	3302	3281	2729	5962	4195	5124	5108	4357	5799	5463	5356	3699	[["Unclassified", "Poorly Characterized", "Function unknown"]]
K09119	0	0	0	0	0	0	0	0	0	0	0	0	0	0	0	0	0	0	[["Unclassified", "Poorly Characterized", "Function unknown"]]
K02106	580	911	590	899	579	603	508	459	550	536	1161	726	663	984	1011	852	806	794	[["Environmental Information Processing", "Signal Transduction", "Two-component system"]]
K05823	69	78	59	60	48	95	18	35	9	54	53	53	180	183	113	91	54	137	[["Metabolism", "Amino Acid Metabolism", "Lysine biosynthesis"], ["Metabolism", "Enzyme Families", "Peptidases"]]
K05820	5539	5484	5868	5624	6469	5025	5620	6758	6443	4893	5390	5260	5437	4873	5608	4983	4998	4595	[["Environmental Information Processing", "Membrane Transport", "Transporters"]]
K05826	1667	2989	2497	2176	3576	2920	4480	3632	4161	5095	3108	4138	2827	3483	3369	3192	3346	2158	[["Metabolism", "Amino Acid Metabolism", "Lysine biosynthesis"]]
K05827	129	87	85	49	50	37	29	32	53	298	151	214	128	90	153	258	116	61	[["Metabolism", "Amino Acid Metabolism", "Lysine biosynthesis"]]
K02100	9	22	8	148	9	18	12	1	10	152	46	1	10	87	16	2	28	100	[["Environmental Information Processing", "Membrane Transport", "Transporters"]]
K02101	1	1	6	2	5	3	2	0	1	1	1	0	2	2	2	3	6	9	[["Unclassified", "Metabolism", "Carbohydrate metabolism"]]
K00524	0	0	0	0	0	0	0	0	0	0	0	0	0	0	0	0	0	0	[["Metabolism", "Nucleotide Metabolism", "Pyrimidine metabolism"], ["Metabolism", "Nucleotide Metabolism", "Purine metabolism"]]
K00525	30397	34173	33003	29400	36758	30803	31659	34084	33028	36079	32796	35917	36467	32236	34284	34635	35907	29258	[["Metabolism", "Nucleotide Metabolism", "Pyrimidine metabolism"], ["Genetic Information Processing", "Replication and Repair", "DNA repair and recombination proteins"], ["Metabolism", "Nucleotide Metabolism", "Purine metabolism"]]
K00526	13741	16024	15023	14721	16753	13425	14933	15100	14732	18122	16967	16945	17910	16718	17220	16349	15842	14992	[["Metabolism", "Nucleotide Metabolism", "Pyrimidine metabolism"], ["Genetic Information Processing", "Replication and Repair", "DNA repair and recombination proteins"], ["Metabolism", "Nucleotide Metabolism", "Purine metabolism"]]
K00527	5402	4650	4929	9220	4864	7033	3695	4690	4620	5291	6601	4257	4260	5804	4389	4900	5810	6680	[["Metabolism", "Nucleotide Metabolism", "Pyrimidine metabolism"], ["Metabolism", "Nucleotide Metabolism", "Purine metabolism"]]
K00520	16516	20454	18932	14595	22780	16466	19284	20000	19194	22405	18372	22286	23868	18479	22392	20667	22428	15653	[["Unclassified", "Metabolism", "Energy metabolism"]]
K00522	0	0	0	0	0	0	0	0	0	0	0	0	0	0	0	0	0	0	[["Organismal Systems", "Digestive System", "Mineral absorption"], ["Metabolism", "Metabolism of Cofactors and Vitamins", "Porphyrin and chlorophyll metabolism"]]
K00523	3589	3647	4026	2041	3863	2613	2700	3729	3346	3225	3113	3221	4092	2737	3944	3555	3551	3620	[["Metabolism", "Carbohydrate Metabolism", "Amino sugar and nucleotide sugar metabolism"]]
K02451	350	330	508	206	191	210	116	255	257	303	368	218	163	179	190	392	311	371	[["Environmental Information Processing", "Membrane Transport", "Secretion system"]]
K00528	19801	22865	22537	19163	23973	19692	21425	22397	21897	25971	22345	24216	23958	22702	25077	21828	23546	20438	[["Unclassified", "Metabolism", "Energy metabolism"]]
K00529	14157	15855	15827	9819	14334	10582	11698	12906	11664	17198	14657	17260	16968	15486	18418	16338	15392	13749	[["Metabolism", "Xenobiotics Biodegradation and Metabolism", "Ethylbenzene degradation"], ["Metabolism", "Lipid Metabolism", "Fatty acid metabolism"], ["Metabolism", "Amino Acid Metabolism", "Phenylalanine metabolism"]]
K00025	0	0	0	0	0	0	0	0	0	0	0	0	0	0	0	0	0	0	[["Metabolism", "Carbohydrate Metabolism", "Citrate cycle (TCA cycle)"], ["Metabolism", "Energy Metabolism", "Carbon fixation in photosynthetic organisms"], ["Metabolism", "Carbohydrate Metabolism", "Pyruvate metabolism"], ["Organismal Systems", "Excretory System", "Proximal tubule bicarbonate reclamation"], ["Metabolism", "Carbohydrate Metabolism", "Glyoxylate and dicarboxylate metabolism"]]
K14215	34	60	52	62	40	25	43	50	46	100	231	76	77	130	102	58	86	84	[["Metabolism", "Metabolism of Terpenoids and Polyketides", "Terpenoid backbone biosynthesis"]]
K14213	0	0	0	0	0	0	0	0	0	0	0	0	0	0	0	0	0	0	[["None"]]
K03453	9530	9590	9695	7058	9175	9032	7766	9690	8755	10598	7627	8893	9591	8594	10055	9614	9930	8858	[["Unclassified", "Cellular Processes and Signaling", "Other ion-coupled transporters"]]
K00796	25676	29902	27995	22996	29151	23826	26027	27663	26663	32384	27492	30723	30250	27831	30631	29238	30468	25054	[["Metabolism", "Metabolism of Cofactors and Vitamins", "Folate biosynthesis"]]
K05339	35	49	25	19	30	27	8	35	18	1	31	46	137	114	67	79	16	30	[["Environmental Information Processing", "Signal Transduction", "Two-component system"]]
K00027	9853	11546	10145	9886	8591	6839	7823	8106	6757	14585	11576	12081	11477	9955	12703	12204	13007	9452	[["Metabolism", "Carbohydrate Metabolism", "Pyruvate metabolism"], ["Environmental Information Processing", "Signal Transduction", "Two-component system"]]
K00794	22701	25704	24444	21069	26862	22421	23677	25468	25022	27229	24513	26752	26264	24588	25592	25014	26065	22793	[["Metabolism", "Metabolism of Cofactors and Vitamins", "Riboflavin metabolism"]]
K00793	21045	24070	22726	20116	25345	21228	22352	23830	23692	25656	23043	24901	24822	23024	24088	23601	24640	21413	[["Metabolism", "Metabolism of Cofactors and Vitamins", "Riboflavin metabolism"]]
K01347	0	0	0	0	0	0	0	0	0	7	0	0	4	17	43	0	8	0	[["Environmental Information Processing", "Membrane Transport", "Secretion system"], ["Metabolism", "Enzyme Families", "Peptidases"]]
K01346	0	0	0	0	0	0	0	0	0	0	0	0	0	0	0	0	0	0	[["Metabolism", "Enzyme Families", "Peptidases"], ["Organismal Systems", "Digestive System", "Pancreatic secretion"], ["Organismal Systems", "Digestive System", "Protein digestion and absorption"]]
K01344	0	0	0	0	0	0	0	0	0	0	0	0	0	0	0	0	4	0	[["Metabolism", "Enzyme Families", "Peptidases"], ["Organismal Systems", "Immune System", "Complement and coagulation cascades"]]
K01343	0	0	0	0	0	0	0	0	0	0	0	0	0	0	0	0	0	0	[["Metabolism", "Enzyme Families", "Peptidases"], ["Organismal Systems", "Immune System", "Complement and coagulation cascades"]]
K00791	22934	25672	24280	22466	26580	23332	23748	25175	24965	27687	24694	26295	26335	25622	25650	25118	26165	23363	[["Metabolism", "Metabolism of Terpenoids and Polyketides", "Prenyltransferases"], ["Metabolism", "Metabolism of Terpenoids and Polyketides", "Zeatin biosynthesis"]]
K01340	0	0	0	0	0	0	0	0	0	0	0	0	0	0	0	2	0	0	[["Metabolism", "Enzyme Families", "Peptidases"]]
K00790	23424	26996	25282	23514	27661	23357	24497	25762	25432	28796	26216	27629	27747	26309	26890	27231	27488	24330	[["Metabolism", "Carbohydrate Metabolism", "Amino sugar and nucleotide sugar metabolism"], ["Metabolism", "Glycan Biosynthesis and Metabolism", "Peptidoglycan biosynthesis"]]
K02694	16	0	10	0	0	0	12	0	0	52	26	0	2	36	0	26	4	284	[["Metabolism", "Energy Metabolism", "Photosynthesis proteins"], ["Metabolism", "Energy Metabolism", "Photosynthesis"]]
K02696	16	0	10	0	0	0	12	0	0	52	26	0	2	36	0	26	4	284	[["Metabolism", "Energy Metabolism", "Photosynthesis proteins"], ["Metabolism", "Energy Metabolism", "Photosynthesis"]]
K02697	16	0	10	0	0	0	12	0	0	52	26	0	2	36	0	26	4	284	[["Metabolism", "Energy Metabolism", "Photosynthesis proteins"], ["Metabolism", "Energy Metabolism", "Photosynthesis"]]
K02690	16	0	10	0	0	0	12	0	0	52	26	0	2	36	0	26	4	284	[["Metabolism", "Energy Metabolism", "Photosynthesis proteins"], ["Metabolism", "Energy Metabolism", "Photosynthesis"]]
K02691	16	0	10	24	0	18	12	0	0	52	26	0	2	36	0	26	4	284	[["Metabolism", "Energy Metabolism", "Photosynthesis proteins"], ["Metabolism", "Energy Metabolism", "Photosynthesis"]]
K02692	16	0	10	0	0	0	12	0	0	52	26	0	2	36	0	26	4	284	[["Metabolism", "Energy Metabolism", "Photosynthesis proteins"], ["Metabolism", "Energy Metabolism", "Photosynthesis"]]
K02693	16	0	10	0	0	0	12	0	0	52	26	0	2	36	0	26	4	284	[["Metabolism", "Energy Metabolism", "Photosynthesis proteins"], ["Metabolism", "Energy Metabolism", "Photosynthesis"]]
K02698	31	1	19	1	0	0	23	0	1	104	53	0	4	72	1	51	9	567	[["Metabolism", "Energy Metabolism", "Photosynthesis proteins"], ["Metabolism", "Energy Metabolism", "Photosynthesis"]]
K02699	16	0	10	0	0	0	12	0	0	52	26	0	2	36	0	26	4	284	[["Metabolism", "Energy Metabolism", "Photosynthesis proteins"], ["Metabolism", "Energy Metabolism", "Photosynthesis"]]
K00836	2374	2315	2637	1464	2324	1652	1590	2333	2165	2169	1932	1996	1928	1884	2270	2560	1873	2291	[["Metabolism", "Amino Acid Metabolism", "Amino acid related enzymes"], ["Metabolism", "Amino Acid Metabolism", "Glycine, serine and threonine metabolism"]]
K00837	25667	33317	30916	22793	33035	25882	33780	33287	33956	35498	28101	33341	28889	28125	32071	30234	32579	23256	[["Unclassified", "Metabolism", "Amino acid metabolism"]]
K00835	172	120	89	1583	103	120	82	46	67	267	886	87	218	325	525	169	98	528	[["Metabolism", "Amino Acid Metabolism", "Amino acid related enzymes"], ["Metabolism", "Amino Acid Metabolism", "Valine, leucine and isoleucine biosynthesis"]]
K00832	5266	5993	6480	5860	7266	5450	4870	5614	5949	5932	6589	6680	8441	6107	6551	6270	6058	7205	[["Metabolism", "Biosynthesis of Other Secondary Metabolites", "Isoquinoline alkaloid biosynthesis"], ["Metabolism", "Amino Acid Metabolism", "Cysteine and methionine metabolism"], ["Metabolism", "Biosynthesis of Other Secondary Metabolites", "Tropane, piperidine and pyridine alkaloid biosynthesis"], ["Metabolism", "Amino Acid Metabolism", "Phenylalanine metabolism"], ["Metabolism", "Amino Acid M…
K00833	14697	15921	15509	13863	16941	13600	13294	15477	14675	15824	15782	16507	17622	14846	16390	16126	16886	14894	[["Metabolism", "Metabolism of Cofactors and Vitamins", "Biotin metabolism"], ["Metabolism", "Amino Acid Metabolism", "Amino acid related enzymes"]]
K00830	22996	27106	27037	19255	28717	22270	27876	29937	28790	28123	23421	28727	24253	24015	28344	24942	27166	19661	[["Metabolism", "Amino Acid Metabolism", "Amino acid related enzymes"], ["Metabolism", "Amino Acid Metabolism", "Glycine, serine and threonine metabolism"], ["Metabolism", "Amino Acid Metabolism", "Alanine, aspartate and glutamate metabolism"], ["Metabolism", "Energy Metabolism", "Methane metabolism"], ["Cellular Processes", "Transport and Catabolism", "Peroxisome"]]
K00831	17502	18118	18110	15882	18637	16154	14970	17233	16308	18472	17585	18258	20486	17995	19243	18438	17799	17578	[["Metabolism", "Amino Acid Metabolism", "Amino acid related enzymes"], ["Metabolism", "Amino Acid Metabolism", "Glycine, serine and threonine metabolism"], ["Metabolism", "Energy Metabolism", "Methane metabolism"], ["Metabolism", "Metabolism of Cofactors and Vitamins", "Vitamin B6 metabolism"]]
K00839	1025	1439	731	1006	923	748	551	684	654	709	1185	754	1425	1506	1291	1059	762	814	[["Metabolism", "Amino Acid Metabolism", "Amino acid related enzymes"]]
K04335	82	111	214	148	50	62	70	52	65	117	93	79	41	44	61	55	74	97	[["Environmental Information Processing", "Membrane Transport", "Secretion system"]]
K04334	2	5	4	118	4	18	2	0	0	51	29	0	1	6	0	2	4	35	[["Environmental Information Processing", "Membrane Transport", "Secretion system"]]
K01120	1456	1520	1737	1029	1558	1140	1390	1908	1935	1162	863	1019	942	858	1108	1142	1251	968	[["Metabolism", "Nucleotide Metabolism", "Purine metabolism"]]
K01126	32803	37621	36202	28686	36277	28189	32121	35305	34167	39211	34321	37209	37180	32427	36633	37030	36692	31307	[["Metabolism", "Lipid Metabolism", "Glycerophospholipid metabolism"]]
K04333	7	23	8	150	10	18	10	1	10	152	47	2	8	86	15	9	26	117	[["Genetic Information Processing", "Transcription", "Transcription factors"]]
K01129	20109	23199	21924	18349	22602	18571	21475	22518	22116	24663	21512	23524	21675	21544	22200	22327	23033	19749	[["Metabolism", "Nucleotide Metabolism", "Purine metabolism"]]
K01128	62	72	75	53	98	35	68	42	56	38	71	44	489	96	138	81	51	111	[["Unclassified", "Metabolism", "Others"]]
K04339	0	2	0	0	0	0	0	0	0	2	0	1	0	0	1	0	0	0	[["Metabolism", "Biosynthesis of Other Secondary Metabolites", "Streptomycin biosynthesis"]]
K04338	156	138	255	192	56	79	71	59	76	124	117	88	44	45	64	66	81	139	[["Environmental Information Processing", "Membrane Transport", "Secretion system"]]
K02470	24902	28349	26517	24409	28446	24042	25206	26700	26262	30372	27486	28469	28640	27270	28061	28402	28627	25355	[["Genetic Information Processing", "Replication and Repair", "DNA repair and recombination proteins"], ["Genetic Information Processing", "Replication and Repair", "DNA replication proteins"]]
K02471	3833	4034	4545	4612	4551	4166	4333	4578	4343	4070	4882	4305	4822	4824	5552	4306	4312	3891	[["Environmental Information Processing", "Membrane Transport", "ABC transporters"], ["Environmental Information Processing", "Membrane Transport", "Transporters"]]
K02472	3351	4036	3442	3961	2769	2115	2932	2640	2194	4682	4002	3709	4748	3288	4427	4548	4149	2803	[["Metabolism", "Carbohydrate Metabolism", "Amino sugar and nucleotide sugar metabolism"]]
K02473	2	11	15	4	4	15	0	4	3	0	0	5	6	4	12	2	3	2	[["Metabolism", "Carbohydrate Metabolism", "Amino sugar and nucleotide sugar metabolism"]]
K02474	6419	6390	7109	6755	8255	7112	5829	6926	6542	6377	6534	6977	9367	5726	6710	6942	7980	7157	[["Metabolism", "Carbohydrate Metabolism", "Amino sugar and nucleotide sugar metabolism"], ["Metabolism", "Glycan Biosynthesis and Metabolism", "Lipopolysaccharide biosynthesis proteins"]]
K02475	2160	2375	2176	1169	1638	1242	1477	1451	1202	3469	2013	2854	2530	2003	3129	2512	2648	1694	[["Environmental Information Processing", "Signal Transduction", "Two-component system"]]
K02476	2182	2355	2145	1175	1602	1205	1482	1439	1209	3529	2011	2877	2590	1980	3087	2605	2645	1743	[["Metabolism", "Enzyme Families", "Protein kinases"], ["Environmental Information Processing", "Signal Transduction", "Two-component system"]]
K02477	22667	29136	27751	23453	32863	26421	33141	33454	35586	32978	26402	29775	26292	25737	25869	26773	28687	25072	[["Environmental Information Processing", "Signal Transduction", "Two-component system"]]
K02478	1793	2303	2075	2734	1505	992	1484	1409	1223	2512	2728	1885	2307	1745	2138	2956	2124	1809	[["Metabolism", "Enzyme Families", "Protein kinases"], ["Environmental Information Processing", "Signal Transduction", "Two-component system"]]
K02479	10584	14689	13247	10446	16241	12971	16869	15365	16595	19893	13364	17436	13881	13779	15610	14278	16619	10820	[["Environmental Information Processing", "Signal Transduction", "Two-component system"]]
K09019	3225	3200	3827	2813	4706	3366	2734	3138	3051	3505	3311	3917	5458	3228	3815	3878	3676	3425	[["Unclassified", "Metabolism", "Energy metabolism"]]
K01267	1350	1453	1532	1906	1647	1560	1007	1693	1522	1470	1705	1198	1446	1565	1299	1764	1566	2234	[["Metabolism", "Enzyme Families", "Peptidases"]]
K13074	49	112	93	35	41	43	35	24	30	75	52	68	32	36	71	112	51	43	[["Metabolism", "Enzyme Families", "Cytochrome P450"]]
K13075	146	226	207	86	128	111	142	122	105	200	151	255	161	143	147	256	122	89	[["Unclassified", "Metabolism", "Lipid metabolism"]]
K11441	9	10	26	5	8	14	1	3	2	7	35	6	3	8	0	1	7	24	[["Metabolism", "Carbohydrate Metabolism", "Pentose phosphate pathway"]]
K14055	111	91	77	1582	69	94	31	44	78	185	851	37	81	246	88	74	89	286	[["Unclassified", "Cellular Processes and Signaling", "Signal transduction mechanisms"]]
K13299	0	0	0	0	0	0	0	0	0	0	0	0	0	0	0	0	0	0	[["None"]]
K13292	17772	21838	20425	19725	25110	20168	23014	23744	24542	24815	22227	24049	22344	22334	22185	20897	22673	20047	[["Unclassified", "Metabolism", "Lipid metabolism"]]
K14057	14	82	70	160	54	38	28	22	45	167	72	63	68	140	42	75	45	109	[["Genetic Information Processing", "Transcription", "Transcription factors"]]
K14056	3	20	4	90	9	0	8	1	9	150	30	1	7	81	14	5	21	99	[["Genetic Information Processing", "Transcription", "Transcription factors"]]
K02856	3964	5643	4956	4584	6733	5414	7355	6287	7144	7849	5960	6408	5337	6592	6074	5347	5905	4148	[["Unclassified", "Cellular Processes and Signaling", "Other ion-coupled transporters"]]
K02585	3173	3444	3736	3095	3528	3249	2934	3950	3536	3516	3118	3713	3013	2745	2834	3459	4506	3116	[["Metabolism", "Energy Metabolism", "Nitrogen metabolism"]]
K12211	56	36	34	18	30	49	34	54	42	12	26	28	24	4	24	25	90	64	[["Environmental Information Processing", "Membrane Transport", "Secretion system"]]
K12210	12	3	0	0	2	2	2	1	0	0	4	4	2	0	4	0	2	2	[["Environmental Information Processing", "Membrane Transport", "Secretion system"]]
K12213	59	44	50	32	40	55	48	60	50	26	34	44	34	14	40	35	101	78	[["Environmental Information Processing", "Membrane Transport", "Secretion system"]]
K12212	56	36	34	18	30	49	34	54	42	12	26	28	24	4	24	25	90	64	[["Environmental Information Processing", "Membrane Transport", "Secretion system"]]
K12215	0	0	0	0	0	0	0	0	0	0	0	0	0	0	0	0	0	0	[["Environmental Information Processing", "Membrane Transport", "Secretion system"]]
K02854	426	677	580	458	531	250	556	458	361	859	445	596	597	319	447	778	744	421	[["Genetic Information Processing", "Transcription", "Transcription factors"]]
K12217	236	201	223	82	128	186	102	190	172	118	189	156	103	32	112	224	272	132	[["Environmental Information Processing", "Membrane Transport", "Secretion system"]]
K12216	56	36	34	18	30	49	34	54	42	12	26	28	24	4	24	25	90	64	[["Environmental Information Processing", "Membrane Transport", "Secretion system"]]
K12219	56	36	34	18	30	49	34	54	42	12	26	28	24	4	24	25	90	64	[["Environmental Information Processing", "Membrane Transport", "Secretion system"]]
K12218	236	201	223	82	128	186	102	190	172	118	189	156	103	32	112	224	272	132	[["Environmental Information Processing", "Membrane Transport", "Secretion system"]]
K02855	9	46	17	190	20	21	18	5	20	255	66	21	16	166	29	6	51	189	[["Genetic Information Processing", "Transcription", "Transcription factors"]]
K08692	292	369	412	218	308	308	191	276	278	278	406	474	545	504	322	478	338	357	[["Metabolism", "Carbohydrate Metabolism", "Glyoxylate and dicarboxylate metabolism"], ["Metabolism", "Energy Metabolism", "Methane metabolism"]]
K08693	29	86	84	37	57	33	24	21	37	20	63	90	603	106	73	87	31	44	[["Metabolism", "Nucleotide Metabolism", "Pyrimidine metabolism"], ["Metabolism", "Nucleotide Metabolism", "Purine metabolism"]]
K08690	1	1	1	0	9	2	0	0	0	0	8	0	2	0	2	0	0	3	[["Metabolism", "Xenobiotics Biodegradation and Metabolism", "Dioxin degradation"]]
K08691	3191	3393	3335	1920	2754	2173	2671	2766	2186	4400	2952	3726	3449	2971	4164	3052	3691	2368	[["Metabolism", "Carbohydrate Metabolism", "Glyoxylate and dicarboxylate metabolism"], ["Metabolism", "Energy Metabolism", "Carbon fixation pathways in prokaryotes"], ["Metabolism", "Energy Metabolism", "Methane metabolism"], ["Metabolism", "Carbohydrate Metabolism", "C5-Branched dibasic acid metabolism"]]
K08696	46	2	28	2	0	0	34	0	2	156	80	0	6	108	2	76	14	850	[["Unclassified", "Metabolism", "Carbohydrate metabolism"]]
K08697	16	0	10	0	0	0	12	0	0	52	26	0	2	36	0	26	4	284	[["Unclassified", "Metabolism", "Carbohydrate metabolism"]]
K11748	1178	1181	1281	2331	1271	1205	851	1528	1312	1118	1551	940	1216	935	937	1177	1242	1554	[["Unclassified", "Cellular Processes and Signaling", "Other ion-coupled transporters"]]
K11749	19491	21703	21222	20218	24387	20844	21688	23325	23540	23763	21328	22968	22529	21290	21896	20559	22479	19968	[["Metabolism", "Enzyme Families", "Peptidases"], ["Cellular Processes", "Cell Growth and Death", "Cell cycle - Caulobacter"]]
K11746	176	188	210	186	127	113	44	150	165	292	199	119	72	234	145	148	97	421	[["Unclassified", "Cellular Processes and Signaling", "Other ion-coupled transporters"]]
K11747	3460	3755	4027	4844	5615	4388	3577	3964	3599	3690	4787	4506	6564	4532	4936	4704	4301	4083	[["Unclassified", "Cellular Processes and Signaling", "Other ion-coupled transporters"]]
K11744	4	25	45	200	32	40	26	2	42	230	58	18	9	116	56	69	62	166	[["Unclassified", "Cellular Processes and Signaling", "Membrane and intracellular structural molecules"]]
K11745	765	871	935	606	704	577	636	854	696	890	757	882	579	724	781	673	702	652	[["Unclassified", "Cellular Processes and Signaling", "Other ion-coupled transporters"]]
K11742	125	165	51	1637	75	86	57	70	52	182	947	88	82	284	113	128	84	266	[["Unclassified", "Cellular Processes and Signaling", "Other ion-coupled transporters"]]
K11743	149	201	112	1986	117	188	97	109	69	219	1024	96	100	367	155	162	103	452	[["Unclassified", "Cellular Processes and Signaling", "Other ion-coupled transporters"]]
K11740	1066	640	662	315	511	445	256	384	367	354	941	415	422	917	520	478	331	684	[["Unclassified", "Poorly Characterized", "General function prediction only"]]
K11741	15505	17222	16676	12938	17005	12772	14474	16015	15265	17583	16720	18405	19751	16407	17387	17442	16937	15227	[["Unclassified", "Cellular Processes and Signaling", "Other ion-coupled transporters"]]
K13920	39	101	81	304	74	136	37	55	51	204	238	105	168	252	275	103	107	276	[["Metabolism", "Lipid Metabolism", "Glycerolipid metabolism"]]
K13921	1	18	9	68	5	20	8	16	10	102	32	1	6	81	31	3	21	94	[["Metabolism", "Lipid Metabolism", "Glycerolipid metabolism"]]
K13922	63	64	103	792	179	206	63	71	49	156	455	72	93	356	182	144	67	403	[["Metabolism", "Lipid Metabolism", "Glycerolipid metabolism"]]
K13923	1	18	9	68	5	20	8	16	10	102	32	1	6	81	31	3	21	94	[["Metabolism", "Carbohydrate Metabolism", "Propanoate metabolism"]]
K13924	9208	9103	10338	6220	9656	7029	8569	10543	10760	8703	8324	8865	7547	8011	7873	8226	8252	8405	[["Cellular Processes", "Cell Motility", "Bacterial motility proteins"], ["Cellular Processes", "Cell Motility", "Bacterial chemotaxis"], ["Environmental Information Processing", "Signal Transduction", "Two-component system"]]
K13925	0	0	0	0	0	0	0	0	0	0	1	0	0	0	18	0	0	0	[["Human Diseases", "Infectious Diseases", "Bacterial invasion of epithelial cells"]]
K13926	1924	1882	2072	3286	1863	1565	1660	2022	1883	1865	2717	1776	1714	1928	2024	1912	1746	1708	[["Unclassified", "Genetic Information Processing", "Translation proteins"]]
K13927	80	52	86	341	32	294	42	29	46	120	252	14	36	166	34	43	54	80	[["Environmental Information Processing", "Signal Transduction", "Two-component system"]]
K13928	310	277	355	220	194	227	91	205	203	333	303	175	111	144	135	252	242	398	[["Genetic Information Processing", "Transcription", "Transcription factors"]]
K13929	1179	1189	1603	895	1055	998	899	1143	1023	1261	1294	1234	1284	997	1166	1265	1326	1459	[["Unclassified", "Metabolism", "Lipid metabolism"]]
K09923	156	122	125	1608	101	139	36	52	95	196	898	54	101	264	118	86	118	310	[["Unclassified", "Poorly Characterized", "Function unknown"]]
K09922	5722	5680	6263	6187	6382	6487	5071	6694	6090	4936	5576	5276	6111	4494	5204	5785	5294	6102	[["Unclassified", "Poorly Characterized", "Function unknown"]]
K06201	6506	6901	6251	8246	8552	7920	7182	6287	6708	9772	8960	8111	10191	9753	8600	8369	8088	7539	[["Unclassified", "Cellular Processes and Signaling", "Inorganic ion transport and metabolism"]]
K06200	8636	9920	9476	9453	11098	8881	8843	9243	9551	9771	10551	10903	11131	9528	8922	9351	11588	9300	[["Unclassified", "Cellular Processes and Signaling", "Signal transduction mechanisms"]]
K06207	21216	24381	22928	20702	25203	21216	22534	23867	23721	25909	23482	24760	25076	23873	24733	23795	24011	21889	[["Unclassified", "Cellular Processes and Signaling", "Signal transduction mechanisms"]]
K06206	2556	2571	2497	4409	2530	2227	2270	2644	2449	2708	3499	2619	2084	2716	2366	2146	2753	2645	[["Unclassified", "Metabolism", "Carbohydrate metabolism"]]
K06205	162	121	136	1598	111	139	32	50	100	207	893	49	89	257	90	87	114	407	[["Unclassified", "Metabolism", "Energy metabolism"]]
K09924	5940	8164	7938	6471	9791	7779	10110	9362	9987	9460	7962	9203	7873	8339	9145	8040	8094	6014	[["Unclassified", "Poorly Characterized", "Function unknown"]]
K09929	57	102	101	49	48	77	28	36	47	43	133	30	15	95	425	57	48	272	[["Unclassified", "Poorly Characterized", "Function unknown"]]
K06208	2995	3552	3183	1892	2512	1783	2378	2442	2053	4421	2792	3834	3634	2895	4283	3436	3907	2636	[["Metabolism", "Amino Acid Metabolism", "Phenylalanine, tyrosine and tryptophan biosynthesis"]]
K00759	18504	21544	19883	17502	22246	17938	19883	20838	20341	23148	20283	21724	21787	21115	22401	21464	21336	17894	[["Metabolism", "Nucleotide Metabolism", "Purine metabolism"]]
K00758	6465	7620	7029	6681	8205	6132	5846	6341	5538	7177	7875	8067	10299	7845	9089	8862	7721	6011	[["Human Diseases", "Cancers", "Bladder cancer"], ["Metabolism", "Nucleotide Metabolism", "Pyrimidine metabolism"], ["Metabolism", "Xenobiotics Biodegradation and Metabolism", "Drug metabolism - other enzymes"]]
K00752	249	212	108	109	101	100	30	51	67	70	114	91	195	180	216	188	69	142	[["Unclassified", "Metabolism", "Others"]]
K00757	2283	1577	1624	4679	1651	3145	1517	1436	1528	2602	3027	1289	1767	2997	1514	1880	1943	2839	[["Metabolism", "Nucleotide Metabolism", "Pyrimidine metabolism"], ["Metabolism", "Xenobiotics Biodegradation and Metabolism", "Drug metabolism - other enzymes"]]
K00756	2874	4108	3702	3614	4775	3942	5484	5032	5752	6116	4146	4998	3566	4432	4258	4071	4259	3626	[["Metabolism", "Nucleotide Metabolism", "Pyrimidine metabolism"]]
K00754	14555	16435	15589	13227	15232	13373	14046	16678	16028	15203	13608	13735	12673	12128	13571	14039	15189	14141	[["Metabolism", "Carbohydrate Metabolism", "Fructose and mannose metabolism"]]
K06001	4552	4594	4695	4837	4410	4864	3581	4681	4174	5002	4210	4441	4068	3358	3693	4643	5589	4268	[["Metabolism", "Amino Acid Metabolism", "Phenylalanine, tyrosine and tryptophan biosynthesis"], ["Metabolism", "Amino Acid Metabolism", "Glycine, serine and threonine metabolism"]]
K05557	115	116	108	59	66	52	45	40	60	147	144	161	82	106	154	188	160	72	[["Environmental Information Processing", "Membrane Transport", "Transporters"]]
K09766	114	113	40	203	142	127	31	71	90	173	186	65	60	48	47	221	132	140	[["Unclassified", "Poorly Characterized", "Function unknown"]]
K05554	209	248	222	115	145	133	102	81	80	241	246	277	207	170	328	606	192	128	[["Metabolism", "Metabolism of Terpenoids and Polyketides", "Biosynthesis of type II polyketide backbone"], ["Metabolism", "Lipid Metabolism", "Lipid biosynthesis proteins"]]
K07475	0	0	0	0	0	0	0	0	0	0	0	0	0	0	0	0	0	0	[["Unclassified", "Genetic Information Processing", "Replication, recombination and repair proteins"]]
K07150	871	934	755	1454	719	942	524	460	363	1379	1267	803	962	1419	1107	908	825	1476	[["Unclassified", "Poorly Characterized", "General function prediction only"]]
K07151	184	202	205	726	84	83	89	130	140	156	490	105	30	147	169	208	83	168	[["Metabolism", "Glycan Biosynthesis and Metabolism", "Glycosyltransferases"], ["Metabolism", "Glycan Biosynthesis and Metabolism", "Various types of N-glycan biosynthesis"], ["Metabolism", "Glycan Biosynthesis and Metabolism", "N-Glycan biosynthesis"], ["Genetic Information Processing", "Folding, Sorting and Degradation", "Protein processing in endoplasmic reticulum"]]
K07152	27102	30719	31012	22150	36474	27172	30861	33826	33789	31222	27422	32875	33784	27631	32446	30332	30696	25737	[["Unclassified", "Poorly Characterized", "General function prediction only"]]
K07153	1792	1763	1829	3085	3208	2247	1499	1895	1642	1911	2797	2317	4062	2233	2442	2385	2462	2457	[["Unclassified", "Poorly Characterized", "General function prediction only"]]
K07154	19215	22783	22052	19716	26415	21969	23304	24375	25090	25106	21427	23592	24681	21986	22903	22292	23445	20700	[["Unclassified", "Poorly Characterized", "General function prediction only"]]
K07155	1	0	0	0	0	0	2	0	0	0	0	0	1	1	1	0	0	0	[["Unclassified", "Metabolism", "Others"]]
K07156	6175	7048	6723	5847	5921	4478	4930	5837	5473	6781	6943	6643	7599	6502	6183	7012	5982	7005	[["Unclassified", "Poorly Characterized", "General function prediction only"]]
K07157	12820	13826	14025	9218	14731	10601	11993	13558	12481	13978	12654	14336	15955	12385	14502	13976	13502	11985	[["Unclassified", "Poorly Characterized", "General function prediction only"]]
K07406	1997	2142	2253	2391	1676	1516	1556	1485	1232	3307	2104	2572	2897	2325	3021	1987	2390	2330	[["Metabolism", "Glycan Biosynthesis and Metabolism", "Glycosphingolipid biosynthesis - globo series"], ["Metabolism", "Lipid Metabolism", "Glycerolipid metabolism"], ["Metabolism", "Lipid Metabolism", "Sphingolipid metabolism"], ["Metabolism", "Carbohydrate Metabolism", "Galactose metabolism"]]
K07407	18836	23633	21156	20374	25835	23046	25297	23456	25107	29175	22573	25600	23833	23249	24279	25240	24771	18732	[["Metabolism", "Glycan Biosynthesis and Metabolism", "Glycosphingolipid biosynthesis - globo series"], ["Metabolism", "Lipid Metabolism", "Glycerolipid metabolism"], ["Metabolism", "Lipid Metabolism", "Sphingolipid metabolism"], ["Metabolism", "Carbohydrate Metabolism", "Galactose metabolism"]]
K07404	4955	6556	5750	7221	7597	6034	8140	7340	8016	8298	7717	7256	5882	7240	6507	6404	6538	5462	[["Metabolism", "Carbohydrate Metabolism", "Pentose phosphate pathway"]]
K07405	1147	673	615	1483	593	2123	728	560	650	954	916	571	753	1372	690	783	675	1097	[["Metabolism", "Carbohydrate Metabolism", "Starch and sucrose metabolism"]]
K07402	19746	22268	21659	16883	20900	15448	18091	20091	19355	22533	22040	22025	20947	20334	22893	20870	21174	18843	[["Unclassified", "Genetic Information Processing", "Protein folding and associated processing"]]
K07403	8295	10837	10090	8136	11746	9512	11560	11856	11841	13277	9380	12083	10790	9322	10854	10027	12470	8221	[["Unclassified", "Genetic Information Processing", "Protein folding and associated processing"]]
K07400	1237	1321	1336	2880	2746	1912	1119	1138	1096	1639	2453	1967	3697	2069	2195	2099	2088	1924	[["Unclassified", "Genetic Information Processing", "Protein folding and associated processing"]]
K07401	1906	2148	2348	1475	2189	1655	2004	2359	2301	2021	1568	1829	1787	1684	1849	1879	1880	1911	[["Unclassified", "Genetic Information Processing", "Protein folding and associated processing"]]
K01808	17335	21168	18886	17128	19968	16776	20120	19527	20143	23660	19845	21195	18462	20063	19697	18992	20852	17157	[["Metabolism", "Carbohydrate Metabolism", "Pentose phosphate pathway"], ["Metabolism", "Energy Metabolism", "Carbon fixation in photosynthetic organisms"]]
K01809	21486	24541	23342	19662	24734	20696	22539	22631	22397	27193	24376	26161	25830	24675	25180	24605	25700	21296	[["Metabolism", "Carbohydrate Metabolism", "Amino sugar and nucleotide sugar metabolism"], ["Metabolism", "Carbohydrate Metabolism", "Fructose and mannose metabolism"]]
K01800	8377	8986	9647	6971	10946	8143	8373	9322	9241	8511	8863	10189	11612	9512	9880	9411	8973	8995	[["Metabolism", "Amino Acid Metabolism", "Tyrosine metabolism"], ["Metabolism", "Xenobiotics Biodegradation and Metabolism", "Styrene degradation"]]
K01801	5	11	20	5	4	15	0	4	3	0	2	5	6	4	12	4	3	3	[["Metabolism", "Amino Acid Metabolism", "Tyrosine metabolism"]]
K01802	36260	41517	39593	30403	42335	33792	37827	39711	40097	42953	37254	42613	43552	40354	42140	40645	39436	35998	[["Unclassified", "Genetic Information Processing", "Protein folding and associated processing"]]
K01803	21946	25304	23738	21533	26100	21896	23072	24660	24469	26886	24559	26011	25853	24508	25433	24704	25716	23229	[["Metabolism", "Carbohydrate Metabolism", "Inositol phosphate metabolism"], ["Metabolism", "Carbohydrate Metabolism", "Glycolysis / Gluconeogenesis"], ["Metabolism", "Carbohydrate Metabolism", "Fructose and mannose metabolism"], ["Metabolism", "Energy Metabolism", "Carbon fixation in photosynthetic organisms"]]
K01804	7097	9455	8317	7049	9707	7274	10127	8855	9138	12510	8910	10363	9425	9134	10207	9954	10038	6804	[["Metabolism", "Carbohydrate Metabolism", "Pentose and glucuronate interconversions"]]
K01805	9864	12375	11223	8462	12592	9600	11758	10674	11017	14282	11561	13442	14066	12745	13251	12708	12812	9423	[["Metabolism", "Carbohydrate Metabolism", "Fructose and mannose metabolism"], ["Metabolism", "Carbohydrate Metabolism", "Pentose and glucuronate interconversions"]]
K01807	9283	8818	9434	8713	11230	9442	8016	9965	9047	9036	9650	9400	11614	9376	10502	10046	9509	9930	[["Metabolism", "Carbohydrate Metabolism", "Pentose phosphate pathway"], ["Metabolism", "Energy Metabolism", "Carbon fixation in photosynthetic organisms"]]
K09718	0	0	0	0	0	0	0	0	0	0	0	0	0	0	0	0	0	0	[["Unclassified", "Poorly Characterized", "Function unknown"]]
K14668	640	892	660	399	621	425	573	449	392	662	796	880	945	693	949	1480	803	455	[["None"]]
K14669	339	392	358	190	357	244	156	167	183	387	406	564	418	499	691	809	433	264	[["None"]]
K14666	155	140	178	120	158	115	103	94	96	163	173	182	232	272	275	187	132	275	[["None"]]
K14667	670	921	684	406	628	431	581	458	410	703	830	932	970	709	971	1505	813	471	[["None"]]
K01664	3038	3796	3269	3579	2683	2082	2493	2554	2199	3745	3964	3487	3605	3398	3773	4234	3782	2808	[["Metabolism", "Metabolism of Cofactors and Vitamins", "Folate biosynthesis"]]
K01665	9390	10340	9894	9995	9773	9268	9134	9685	9145	11553	10177	10986	11029	9683	10111	10409	11240	9492	[["Metabolism", "Metabolism of Cofactors and Vitamins", "Folate biosynthesis"]]
K01666	8622	10254	9994	6714	9133	6827	7860	9079	8723	10863	8817	10084	10805	8209	9811	10476	10061	9111	[["Metabolism", "Xenobiotics Biodegradation and Metabolism", "Xylene degradation"], ["Metabolism", "Xenobiotics Biodegradation and Metabolism", "Dioxin degradation"], ["Metabolism", "Amino Acid Metabolism", "Phenylalanine metabolism"], ["Metabolism", "Xenobiotics Biodegradation and Metabolism", "Benzoate degradation"]]
K01667	2382	2992	2854	4235	3074	3237	3042	2759	3108	2956	3693	2618	2518	2734	2764	2437	2762	2379	[["Metabolism", "Amino Acid Metabolism", "Tryptophan metabolism"], ["Metabolism", "Energy Metabolism", "Nitrogen metabolism"]]
K01660	0	0	0	0	0	0	0	0	0	0	0	0	0	0	0	0	0	0	[["None"]]
K01661	5894	6227	5831	5321	4618	4055	4234	4710	4261	7249	5763	5758	5811	5991	6735	5567	6041	4913	[["Metabolism", "Metabolism of Cofactors and Vitamins", "Ubiquinone and other terpenoid-quinone biosynthesis"]]
K01662	21647	24316	23143	21105	25144	21783	22104	23717	23332	26570	24141	25096	25788	24425	25393	24719	24363	22441	[["Metabolism", "Metabolism of Terpenoids and Polyketides", "Terpenoid backbone biosynthesis"]]
K01663	0	3	0	2	0	0	1	0	12	0	2	0	0	0	2	0	0	0	[["Metabolism", "Amino Acid Metabolism", "Histidine metabolism"]]
K01668	112	41	101	26	40	20	34	31	49	87	87	63	59	150	109	122	69	48	[["Metabolism", "Amino Acid Metabolism", "Tyrosine metabolism"], ["Metabolism", "Energy Metabolism", "Nitrogen metabolism"]]
K01669	18283	20448	19652	15754	22076	16919	19444	20933	20296	21701	19867	21436	20491	18572	21067	19443	21090	16997	[["Genetic Information Processing", "Replication and Repair", "DNA repair and recombination proteins"]]
K02863	22011	25098	23658	21605	26045	22191	23194	24660	24400	26780	24156	25757	25631	24250	25025	24410	25521	22721	[["Genetic Information Processing", "Translation", "Ribosome"]]
K02862	446	504	542	250	405	316	445	580	442	410	266	294	358	186	234	444	487	281	[["Unclassified", "Poorly Characterized", "Function unknown"]]
K02860	21120	24332	22848	20976	25256	21342	22551	23869	23667	26057	23537	24785	25122	23934	24714	23779	23969	21988	[["Genetic Information Processing", "Translation", "Ribosome Biogenesis"]]
K02867	22012	25099	23659	21608	26046	22192	23196	24660	24400	26812	24156	25757	25631	24250	25025	24410	25521	22726	[["Genetic Information Processing", "Translation", "Ribosome"]]
K02866	0	0	0	0	0	0	0	0	0	0	0	0	0	0	0	0	0	0	[["Genetic Information Processing", "Translation", "Ribosome"]]
K02864	21941	25033	23654	21504	25961	22128	23188	24608	24360	26634	24052	25732	25610	24170	24939	24208	25421	22637	[["Genetic Information Processing", "Translation", "Ribosome"]]
K02869	0	0	0	0	0	0	0	0	0	0	0	0	0	0	0	0	0	0	[["Genetic Information Processing", "Translation", "Ribosome"]]
K05362	65	99	48	51	58	11	16	43	26	49	45	65	36	162	69	138	47	63	[["Metabolism", "Glycan Biosynthesis and Metabolism", "Peptidoglycan biosynthesis"]]
K05365	10502	14407	12904	14260	19180	14624	17657	16253	17505	18281	15624	17649	17368	14770	15229	14618	17151	12087	[["Metabolism", "Glycan Biosynthesis and Metabolism", "Glycosyltransferases"], ["Metabolism", "Glycan Biosynthesis and Metabolism", "Peptidoglycan biosynthesis"]]
K03402	8942	11353	9906	10491	10691	9060	11275	10111	10556	14665	11334	12010	10696	11953	11861	11341	11886	8930	[["Genetic Information Processing", "Transcription", "Transcription factors"]]
K03403	180	184	267	124	156	125	160	179	152	216	218	142	161	223	98	134	125	750	[["Metabolism", "Metabolism of Cofactors and Vitamins", "Porphyrin and chlorophyll metabolism"]]
K03400	0	0	0	0	0	0	0	0	0	0	0	0	0	0	0	0	0	0	[["Unclassified", "Metabolism", "Lipid metabolism"]]
K03406	102566	104302	106915	86962	110139	89016	92235	109151	103438	101677	106917	107730	104524	100912	99528	99129	106645	99123	[["Cellular Processes", "Cell Motility", "Bacterial motility proteins"], ["Cellular Processes", "Cell Motility", "Bacterial chemotaxis"], ["Environmental Information Processing", "Signal Transduction", "Two-component system"]]
K03407	26409	29542	29043	24371	32493	25000	28068	31691	31757	30365	28534	31120	30219	26965	28505	27423	30097	24983	[["Metabolism", "Enzyme Families", "Protein kinases"], ["Cellular Processes", "Cell Motility", "Bacterial chemotaxis"], ["Cellular Processes", "Cell Motility", "Bacterial motility proteins"], ["Environmental Information Processing", "Signal Transduction", "Two-component system"]]
K03404	4641	5296	5060	2966	4051	3323	3475	3820	3304	6297	4431	5975	4887	4158	5614	5421	6501	4197	[["Metabolism", "Metabolism of Cofactors and Vitamins", "Porphyrin and chlorophyll metabolism"]]
K03405	7203	10029	8895	6490	10013	7696	10424	9873	10317	11247	8721	10680	8429	8132	8701	9541	10773	7478	[["Metabolism", "Metabolism of Cofactors and Vitamins", "Porphyrin and chlorophyll metabolism"]]
K03408	33655	36016	36109	30020	39604	31064	34088	38769	38543	35951	35294	37832	36469	33604	34896	33649	36887	31462	[["Cellular Processes", "Cell Motility", "Bacterial motility proteins"], ["Cellular Processes", "Cell Motility", "Bacterial chemotaxis"], ["Environmental Information Processing", "Signal Transduction", "Two-component system"]]
K03409	4660	6562	5586	4958	6925	5321	7822	7198	7938	6991	5453	6724	4745	5227	4994	5122	6401	3891	[["Cellular Processes", "Cell Motility", "Bacterial motility proteins"], ["Cellular Processes", "Cell Motility", "Bacterial chemotaxis"]]
K02315	4247	5877	5014	7604	7132	6321	7669	6530	7605	8678	7345	6729	5191	6894	5861	5927	6301	5269	[["Genetic Information Processing", "Replication and Repair", "DNA replication proteins"]]
K02314	23011	26090	24720	24003	27098	23085	23838	25533	25338	27793	26054	26622	26417	25303	26034	25667	26426	24000	[["Cellular Processes", "Cell Growth and Death", "Cell cycle - Caulobacter"], ["Genetic Information Processing", "Replication and Repair", "DNA replication"], ["Genetic Information Processing", "Replication and Repair", "DNA replication proteins"]]
K02317	3	23	7	152	9	18	10	1	10	152	47	1	8	86	14	2	25	101	[["Genetic Information Processing", "Replication and Repair", "Homologous recombination"], ["Genetic Information Processing", "Replication and Repair", "DNA repair and recombination proteins"]]
K02316	21996	25097	23660	21597	26045	22209	23190	24651	24400	26800	24151	25757	25633	24254	25025	24402	25521	22728	[["Genetic Information Processing", "Replication and Repair", "DNA replication"], ["Genetic Information Processing", "Replication and Repair", "DNA replication proteins"]]
K02313	22945	26060	24800	22332	27134	23237	23919	26054	25538	27658	24782	26583	26699	24802	25700	25488	26601	23868	[["Genetic Information Processing", "Replication and Repair", "Chromosome"], ["Environmental Information Processing", "Signal Transduction", "Two-component system"], ["Cellular Processes", "Cell Growth and Death", "Cell cycle - Caulobacter"], ["Genetic Information Processing", "Replication and Repair", "DNA replication proteins"]]
K02312	3247	3780	3645	2075	3045	2094	2950	3092	2750	4780	2805	3682	4107	2485	3873	3916	3899	2290	[["Metabolism", "Metabolism of Terpenoids and Polyketides", "Biosynthesis of siderophore group nonribosomal peptides"]]
K02319	851	720	768	552	761	814	598	739	684	707	571	943	474	311	291	604	1504	618	[["Metabolism", "Nucleotide Metabolism", "Pyrimidine metabolism"], ["Metabolism", "Nucleotide Metabolism", "Purine metabolism"], ["Genetic Information Processing", "Replication and Repair", "DNA replication proteins"]]
K12405	4	2	9	3	4	3	2	6	5	0	7	0	0	0	4	0	6	0	[["None"]]
K12152	87	71	44	1567	55	70	28	27	50	182	835	30	76	215	87	52	75	219	[["Unclassified", "Metabolism", "Nucleotide metabolism"]]
K12151	3	22	7	152	9	18	10	1	9	152	47	1	8	86	14	2	25	101	[["Unclassified", "Poorly Characterized", "General function prediction only"]]
K07091	6610	7137	7198	7171	8774	6947	6414	7469	6840	6306	7792	7324	9180	7403	8461	7431	7305	6761	[["Environmental Information Processing", "Membrane Transport", "ABC transporters"], ["Environmental Information Processing", "Membrane Transport", "Transporters"]]
K07090	75406	87856	83951	68044	89304	70960	83605	86105	84818	96171	84731	93868	87577	82574	87826	84834	91579	74588	[["Unclassified", "Poorly Characterized", "General function prediction only"]]
K07093	12822	14051	14292	8931	13310	9654	11613	13174	12532	13984	12052	13775	13496	11198	13466	13611	12926	12039	[["Unclassified", "Poorly Characterized", "General function prediction only"]]
K07092	24	18	38	12	12	13	8	14	16	27	26	11	9	0	6	37	14	3	[["Unclassified", "Poorly Characterized", "General function prediction only"]]
K07095	11696	13562	12896	13965	14264	13683	14127	13960	14450	17130	13800	14123	12575	13655	13028	13577	15030	11469	[["Unclassified", "Poorly Characterized", "General function prediction only"]]
K07094	1740	1693	1872	1123	1829	1597	1336	2211	1857	1491	1120	1345	1808	1098	1283	1743	1729	1901	[["Unclassified", "Poorly Characterized", "General function prediction only"]]
K07097	60	493	52	1040	43	41	101	81	79	90	822	78	155	509	304	180	175	193	[["Unclassified", "Poorly Characterized", "General function prediction only"]]
K07096	14	30	14	93	36	24	48	21	13	40	84	46	60	45	86	7	22	114	[["Unclassified", "Poorly Characterized", "General function prediction only"]]
K07099	234	180	173	670	313	344	206	106	136	510	563	206	351	643	191	219	247	506	[["Unclassified", "Poorly Characterized", "General function prediction only"]]
K07098	16819	18541	17973	16336	19413	17746	19323	19981	20082	20518	17143	18725	16720	17851	16959	18422	19165	15233	[["Unclassified", "Poorly Characterized", "General function prediction only"]]
K11175	21290	24159	23278	20674	25450	21295	22660	24228	23950	26332	23430	25406	25154	22866	23997	23890	24891	21709	[["Metabolism", "Metabolism of Cofactors and Vitamins", "One carbon pool by folate"], ["Metabolism", "Nucleotide Metabolism", "Purine metabolism"]]
K11174	0	0	0	0	0	0	0	0	0	0	0	0	0	0	0	0	0	0	[["None"]]
K11177	16272	19686	18542	14885	22905	16990	22872	21303	23461	24035	21356	23072	19991	22155	20209	19218	20046	17140	[["Metabolism", "Nucleotide Metabolism", "Purine metabolism"]]
K11176	0	0	0	0	0	0	0	0	0	0	0	0	0	0	0	0	0	0	[["Metabolism", "Nucleotide Metabolism", "Purine metabolism"]]
K11173	0	0	3	0	1	0	1	0	0	0	0	1	0	0	0	1	0	3	[["Unclassified", "Metabolism", "Others"]]
K11179	3883	3468	3825	4019	4441	3192	3123	3880	3930	3270	4063	3414	2888	2784	3416	3044	4233	3326	[["Genetic Information Processing", "Folding, Sorting and Degradation", "Sulfur relay system"]]
K11178	14486	16175	15641	12291	18959	14268	18087	17631	18809	19146	17433	18737	16541	17446	16730	16141	16750	13661	[["Metabolism", "Nucleotide Metabolism", "Purine metabolism"]]
K00322	5213	7395	6540	6870	8501	6545	9081	8126	9147	9142	7453	8397	6460	6674	6822	7140	8280	5218	[["Metabolism", "Metabolism of Cofactors and Vitamins", "Nicotinate and nicotinamide metabolism"]]
K00320	6431	7693	7291	3925	5676	3899	5215	5434	4449	9405	6199	8063	7555	6044	9081	7704	7751	5170	[["Metabolism", "Energy Metabolism", "Methane metabolism"]]
K00321	0	0	0	0	0	0	0	0	0	0	0	0	0	0	0	0	0	0	[["Unclassified", "Metabolism", "Others"]]
K00326	0	0	0	0	0	0	0	1	0	0	0	0	0	0	0	0	0	0	[["Metabolism", "Carbohydrate Metabolism", "Amino sugar and nucleotide sugar metabolism"]]
K00324	25861	29282	29213	21902	31984	23722	27844	29377	29234	30111	27384	30966	31913	28598	30601	28424	28401	25394	[["Metabolism", "Metabolism of Cofactors and Vitamins", "Nicotinate and nicotinamide metabolism"]]
K00325	14582	16046	16160	12530	17473	12726	14298	15650	15264	16268	15306	16825	17939	15403	17491	15359	15453	14425	[["Metabolism", "Metabolism of Cofactors and Vitamins", "Nicotinate and nicotinamide metabolism"]]
K00329	2261	2075	2214	1529	2257	2142	1613	1964	1781	1818	1741	2471	1936	1122	1087	1720	3668	2061	[["Metabolism", "Energy Metabolism", "Oxidative phosphorylation"]]
K05945	46	22	20	27	6	70	27	11	24	36	9	1	18	60	53	90	28	16	[["Unclassified", "Metabolism", "Others"]]
K05944	0	0	0	0	0	0	0	0	0	6	0	0	0	0	0	0	0	0	[["Unclassified", "Metabolism", "Others"]]
K05947	7	1	3	0	0	0	0	1	1	0	1	0	0	0	0	0	0	0	[["Metabolism", "Glycan Biosynthesis and Metabolism", "Glycosyltransferases"], ["Metabolism", "Carbohydrate Metabolism", "Fructose and mannose metabolism"]]
K05946	7147	9018	8092	6906	10344	8193	10434	9436	10184	13089	9033	11057	8793	9192	10519	9180	10198	7725	[["Metabolism", "Glycan Biosynthesis and Metabolism", "Glycosyltransferases"]]
K06944	64	60	72	44	53	54	98	138	162	82	47	74	62	28	66	43	52	45	[["Unclassified", "Poorly Characterized", "General function prediction only"]]
K06945	6160	7511	6746	3897	5247	3782	5216	5139	4413	8538	6646	7720	7654	5292	7710	9591	8016	5107	[["Unclassified", "Poorly Characterized", "General function prediction only"]]
K06946	1149	1543	1390	2682	1231	1170	909	1509	1309	1191	1907	933	1203	1325	1111	1212	1320	1777	[["Unclassified", "Poorly Characterized", "General function prediction only"]]
K06415	2453	2575	3019	1695	2664	1949	2139	3094	3009	2164	2065	2312	1718	1530	2025	2022	2233	1804	[["Unclassified", "Cellular Processes and Signaling", "Sporulation"]]
K06940	8333	9111	8780	9428	9451	7814	7197	9141	8498	8412	9709	8568	8878	7783	7423	8098	10034	8987	[["Unclassified", "Poorly Characterized", "General function prediction only"]]
K06941	23438	26265	25280	22545	27296	23368	24279	26201	26041	27992	25477	26555	26443	24897	25968	25465	26581	23370	[["Genetic Information Processing", "Translation", "Ribosome Biogenesis"]]
K06942	21999	25099	23659	21608	26045	22196	23186	24661	24401	26780	24157	25757	25631	24258	25026	24411	25512	22756	[["Unclassified", "Poorly Characterized", "General function prediction only"]]
K06943	0	0	0	0	0	0	0	0	0	0	0	0	0	0	0	0	0	0	[["Genetic Information Processing", "Translation", "Ribosome biogenesis in eukaryotes"], ["Genetic Information Processing", "Translation", "Ribosome Biogenesis"]]
K10806	5885	6101	6366	5491	5661	4325	5264	5927	5987	5905	6626	6291	5953	6388	6090	5636	5467	6470	[["Metabolism", "Lipid Metabolism", "Lipid biosynthesis proteins"], ["Metabolism", "Lipid Metabolism", "Biosynthesis of unsaturated fatty acids"]]
K10807	318	252	250	155	329	180	235	237	267	191	294	250	405	186	300	248	206	441	[["Metabolism", "Nucleotide Metabolism", "Pyrimidine metabolism"], ["Genetic Information Processing", "Replication and Repair", "DNA repair and recombination proteins"], ["Metabolism", "Nucleotide Metabolism", "Purine metabolism"], ["Metabolism", "Metabolism of Other Amino Acids", "Glutathione metabolism"]]
K10804	14408	16967	16725	15644	22071	16900	18252	19287	19848	19096	17536	19308	19747	15091	16964	17285	19368	15533	[["Metabolism", "Lipid Metabolism", "Lipid biosynthesis proteins"], ["Metabolism", "Lipid Metabolism", "Biosynthesis of unsaturated fatty acids"]]
K10805	9349	10868	10342	8875	11107	8092	8130	8759	8405	10420	11305	11443	13554	11446	12259	11808	10407	10043	[["Metabolism", "Lipid Metabolism", "Lipid biosynthesis proteins"], ["Metabolism", "Lipid Metabolism", "Biosynthesis of unsaturated fatty acids"]]
K06948	181	143	86	153	109	199	68	61	55	95	135	110	273	265	249	223	127	358	[["Unclassified", "Poorly Characterized", "General function prediction only"]]
K06949	14772	15444	15478	13783	15272	13401	11959	14325	13292	16147	14306	14497	16669	13586	15158	16422	16108	15001	[["Genetic Information Processing", "Translation", "Ribosome Biogenesis"]]
K06418	12	11	13	34	3	4	5	1	6	3	30	16	130	27	39	2	8	29	[["Unclassified", "Cellular Processes and Signaling", "Sporulation"]]
K09138	91	69	100	623	107	67	99	75	119	68	400	47	96	188	41	64	179	73	[["Unclassified", "Poorly Characterized", "Function unknown"]]
K09139	0	0	0	0	0	0	0	0	0	0	0	1	0	0	0	2	0	0	[["Unclassified", "Poorly Characterized", "Function unknown"]]
K09134	5873	8678	7342	6386	8767	6703	9649	9001	9798	8812	7080	8522	6590	6697	6619	7421	8942	5738	[["Unclassified", "Poorly Characterized", "Function unknown"]]
K09135	0	0	0	0	0	0	0	0	0	0	0	0	0	0	0	0	0	0	[["Unclassified", "Poorly Characterized", "Function unknown"]]
K09136	6044	6578	6965	5585	5962	4460	5722	7006	6617	6504	5806	5699	5358	4466	5326	6598	6182	4612	[["Genetic Information Processing", "Translation", "Ribosome Biogenesis"]]
K09137	3884	4857	4196	3625	4692	3633	4411	4584	4829	3887	4150	4515	3777	3753	4457	4218	4327	2892	[["Unclassified", "Poorly Characterized", "Function unknown"]]
K09130	0	0	0	0	0	0	0	0	0	0	0	0	0	0	0	0	0	0	[["Unclassified", "Poorly Characterized", "Function unknown"]]
K09131	14211	16888	16762	12488	18103	13936	17618	18792	18956	17153	14979	17465	15679	14592	15063	15572	16437	14075	[["Unclassified", "Poorly Characterized", "Function unknown"]]
K09132	690	641	686	961	745	876	574	680	597	691	595	908	454	303	235	614	1496	756	[["Unclassified", "Poorly Characterized", "Function unknown"]]
K09133	703	614	622	510	726	976	552	648	588	661	498	898	483	294	227	562	1478	598	[["Unclassified", "Poorly Characterized", "Function unknown"]]
K05808	14085	15671	15428	15450	17954	15845	15995	17119	17172	18680	15526	16665	16146	14539	15473	15230	17640	14778	[["Unclassified", "Genetic Information Processing", "Translation proteins"]]
K05809	93	75	47	1566	57	70	28	27	58	183	842	33	81	245	88	62	88	272	[["Unclassified", "Genetic Information Processing", "Translation proteins"]]
K05804	325	209	179	4870	188	292	90	110	154	417	2507	102	199	615	287	181	219	703	[["Genetic Information Processing", "Replication and Repair", "Chromosome"]]
K05805	3365	3649	4122	4317	4059	3665	3667	3975	3629	3476	4342	4087	4285	3976	4726	3979	3594	3082	[["Unclassified", "Poorly Characterized", "Function unknown"]]
K05806	0	0	0	0	0	0	0	0	0	0	0	0	0	0	0	0	0	0	[["Unclassified", "Metabolism", "Amino acid metabolism"]]
K05807	16635	19016	18399	17172	21761	18672	19421	20817	21062	19724	18588	19998	19834	18526	18538	18051	19515	17338	[["Unclassified", "Poorly Characterized", "General function prediction only"]]
K05800	8557	10414	10665	9062	10464	7582	9580	10039	10697	9783	10957	11625	11641	11708	10037	9621	8688	11500	[["Genetic Information Processing", "Transcription", "Transcription factors"]]
K05801	3867	3929	3734	4785	4433	3991	3779	4037	3689	3519	4135	3850	5029	4751	4744	4002	3688	3168	[["Genetic Information Processing", "Folding, Sorting and Degradation", "Chaperones and folding catalysts"]]
K05802	231	167	241	1675	203	211	74	156	150	253	964	205	249	322	153	162	199	511	[["Unclassified", "Cellular Processes and Signaling", "Pores ion channels"]]
K05803	93	75	47	1567	57	70	28	27	58	183	843	33	81	245	88	62	88	272	[["Unclassified", "Cellular Processes and Signaling", "Membrane and intracellular structural molecules"]]
K01044	1849	1745	1796	1162	1717	1362	1748	1884	1691	2829	1676	2088	1615	1529	1779	1640	1724	1776	[["Metabolism", "Biosynthesis of Other Secondary Metabolites", "Tropane, piperidine and pyridine alkaloid biosynthesis"], ["Metabolism", "Xenobiotics Biodegradation and Metabolism", "Drug metabolism - other enzymes"]]
K01045	9	0	7	1	29	9	8	1	0	2	6	0	3	0	0	0	4	1	[["Metabolism", "Xenobiotics Biodegradation and Metabolism", "Aminobenzoate degradation"], ["Metabolism", "Xenobiotics Biodegradation and Metabolism", "Bisphenol degradation"]]
K01046	5523	6126	6437	3485	5564	3808	4161	5195	4448	6854	5552	5943	6591	5229	7369	6188	6313	5311	[["Metabolism", "Lipid Metabolism", "Glycerolipid metabolism"]]
K02068	292	259	151	2232	224	247	110	117	160	398	1314	163	219	649	286	375	272	556	[["Environmental Information Processing", "Membrane Transport", "Transporters"]]
K04561	6528	8200	8177	6140	10196	6984	8103	8564	9148	8083	7186	9011	10813	7540	8976	8031	8485	7223	[["Metabolism", "Energy Metabolism", "Nitrogen metabolism"]]
K01042	9366	12873	11350	10835	12356	9533	12829	12563	12606	15010	11985	13332	10891	10598	11770	11484	13386	8817	[["Genetic Information Processing", "Translation", "Aminoacyl-tRNA biosynthesis"], ["Metabolism", "Metabolism of Other Amino Acids", "Selenocompound metabolism"]]
K05568	10097	11479	10822	9450	10137	8260	9241	10678	9065	11777	9596	11652	9936	8375	10857	10328	11858	7823	[["Unclassified", "Cellular Processes and Signaling", "Other ion-coupled transporters"]]
K05567	6866	8216	7812	6073	7137	5532	6554	7482	6567	7770	6559	7790	7332	6218	7922	7686	7469	5547	[["Unclassified", "Cellular Processes and Signaling", "Other ion-coupled transporters"]]
K14273	0	0	0	0	0	0	0	0	0	0	0	0	0	0	0	0	0	0	[["Metabolism", "Carbohydrate Metabolism", "Pentose and glucuronate interconversions"]]
K14275	0	0	0	0	0	0	0	0	0	0	0	0	0	0	0	0	0	0	[["Metabolism", "Carbohydrate Metabolism", "Pentose and glucuronate interconversions"]]
K14274	0	0	0	0	1	21	1	0	0	0	18	0	0	16	0	14	0	0	[["None"]]
K02062	226	261	208	1632	217	141	136	119	162	264	957	203	398	554	249	206	182	527	[["Environmental Information Processing", "Membrane Transport", "ABC transporters"], ["Environmental Information Processing", "Membrane Transport", "Transporters"]]
K05245	21	3	4	39	4	0	0	15	1	1	17	2	1	16	1	1	2	35	[["Unclassified", "Cellular Processes and Signaling", "Other ion-coupled transporters"]]
K05564	2756	2831	3122	2210	4306	3074	2591	3057	2875	2843	2905	3513	5642	2885	3143	3365	3637	3547	[["Unclassified", "Cellular Processes and Signaling", "Other ion-coupled transporters"]]
K01048	4379	4060	3885	4622	4557	3645	3709	4091	3603	3659	5034	4037	4615	5037	4750	4173	3589	3476	[["Metabolism", "Lipid Metabolism", "Glycerophospholipid metabolism"]]
K02066	40007	44648	44450	33593	45906	36693	39709	45171	42407	49801	41430	47604	45361	38742	44773	42625	48015	38750	[["Environmental Information Processing", "Membrane Transport", "Transporters"]]
K01322	17971	22068	20714	16897	25691	20185	24418	23192	24502	26724	21656	24688	24057	23014	24293	21777	22717	17933	[["Metabolism", "Enzyme Families", "Peptidases"]]
K01325	0	0	0	0	0	0	0	0	0	0	0	0	0	0	0	0	0	0	[["Metabolism", "Enzyme Families", "Peptidases"], ["Organismal Systems", "Excretory System", "Endocrine and other factor-regulated calcium reabsorption"]]
K02065	33254	38538	38047	30774	43325	34928	39124	42237	42423	41846	35397	41416	38685	34416	36667	36151	40437	33789	[["Environmental Information Processing", "Membrane Transport", "Transporters"]]
K01326	0	0	0	0	0	0	0	0	0	0	2	0	0	0	0	1	0	0	[["Metabolism", "Enzyme Families", "Peptidases"]]
K05560	2756	2831	3122	2210	4306	3074	2591	3057	2875	2843	2905	3513	5642	2885	3143	3365	3637	3547	[["Unclassified", "Cellular Processes and Signaling", "Other ion-coupled transporters"]]
K02243	181	141	75	158	103	197	71	68	55	92	138	102	268	266	172	223	119	337	[["Environmental Information Processing", "Membrane Transport", "Secretion system"]]
K08930	310	429	786	191	194	192	291	242	266	316	326	351	216	172	279	235	327	199	[["Metabolism", "Energy Metabolism", "Photosynthesis proteins"]]
K02679	91	74	47	1516	52	68	36	27	58	133	843	29	81	245	88	57	99	208	[["Environmental Information Processing", "Membrane Transport", "Secretion system"]]
K02676	4065	3878	4462	2975	5695	3970	3678	4697	4608	3736	3659	4042	5496	3347	4541	4104	4353	3976	[["Environmental Information Processing", "Membrane Transport", "Secretion system"], ["Cellular Processes", "Cell Motility", "Bacterial motility proteins"]]
K02674	4915	4815	5299	4270	6949	4960	4357	5561	5432	4681	4691	5301	7176	3861	5100	5150	6314	4897	[["Environmental Information Processing", "Membrane Transport", "Secretion system"], ["Cellular Processes", "Cell Motility", "Bacterial motility proteins"]]
K02675	0	0	0	0	0	0	0	0	0	0	0	0	0	0	0	0	0	0	[["Cellular Processes", "Cell Motility", "Bacterial motility proteins"]]
K02672	4539	4340	4815	4065	6393	4766	4107	5087	4963	4298	4573	5033	6066	3556	4693	4665	5923	4664	[["Environmental Information Processing", "Membrane Transport", "Secretion system"], ["Cellular Processes", "Cell Motility", "Bacterial motility proteins"]]
K02241	50	38	34	668	42	126	53	7	36	125	452	50	226	118	60	17	9	51	[["Environmental Information Processing", "Membrane Transport", "Secretion system"]]
K02670	6511	6380	7140	4822	9178	6707	5599	7018	6533	6218	6531	7262	10323	6037	7839	7350	7705	7216	[["Environmental Information Processing", "Membrane Transport", "Secretion system"], ["Cellular Processes", "Cell Motility", "Bacterial motility proteins"]]
K02671	4407	4394	4864	3825	6310	4314	3830	5010	4938	4111	4494	4548	6836	3688	5340	4788	5011	4786	[["Environmental Information Processing", "Membrane Transport", "Secretion system"], ["Cellular Processes", "Cell Motility", "Bacterial motility proteins"]]
K00810	33	24	39	26	55	23	17	38	16	13	37	13	69	23	20	46	29	57	[["Unclassified", "Metabolism", "Metabolism of cofactors and vitamins"]]
K00811	1709	1216	1255	1907	1179	2470	1178	1176	1099	1583	1259	1037	1366	1772	1152	1382	1285	1617	[["Metabolism", "Biosynthesis of Other Secondary Metabolites", "Isoquinoline alkaloid biosynthesis"], ["Metabolism", "Amino Acid Metabolism", "Cysteine and methionine metabolism"], ["Metabolism", "Energy Metabolism", "Carbon fixation in photosynthetic organisms"], ["Metabolism", "Biosynthesis of Other Secondary Metabolites", "Tropane, piperidine and pyridine alkaloid biosynthesis"], ["Metabolism"…
K00812	16751	19380	18563	14332	20628	16513	18977	20594	20673	19545	16903	19833	18962	18356	18422	18050	18730	17205	[["Metabolism", "Biosynthesis of Other Secondary Metabolites", "Isoquinoline alkaloid biosynthesis"], ["Metabolism", "Amino Acid Metabolism", "Cysteine and methionine metabolism"], ["Metabolism", "Energy Metabolism", "Carbon fixation in photosynthetic organisms"], ["Metabolism", "Biosynthesis of Other Secondary Metabolites", "Tropane, piperidine and pyridine alkaloid biosynthesis"], ["Metabolism"…
K00813	127	136	89	1595	96	95	83	55	104	231	901	89	85	389	598	120	140	328	[["Metabolism", "Biosynthesis of Other Secondary Metabolites", "Isoquinoline alkaloid biosynthesis"], ["Metabolism", "Amino Acid Metabolism", "Cysteine and methionine metabolism"], ["Metabolism", "Energy Metabolism", "Carbon fixation in photosynthetic organisms"], ["Metabolism", "Biosynthesis of Other Secondary Metabolites", "Tropane, piperidine and pyridine alkaloid biosynthesis"], ["Metabolism"…
K00814	0	0	0	0	4	0	0	5	0	0	0	1	0	0	0	1	4	0	[["Metabolism", "Amino Acid Metabolism", "Amino acid related enzymes"], ["Metabolism", "Energy Metabolism", "Carbon fixation in photosynthetic organisms"], ["Metabolism", "Amino Acid Metabolism", "Alanine, aspartate and glutamate metabolism"]]
K00817	42150	49685	48030	39169	52213	41570	46971	49703	49304	52865	46202	52390	50743	44196	48431	48714	50599	42331	[["Metabolism", "Biosynthesis of Other Secondary Metabolites", "Tropane, piperidine and pyridine alkaloid biosynthesis"], ["Metabolism", "Amino Acid Metabolism", "Phenylalanine metabolism"], ["Metabolism", "Amino Acid Metabolism", "Histidine metabolism"], ["Metabolism", "Amino Acid Metabolism", "Amino acid related enzymes"], ["Metabolism", "Amino Acid Metabolism", "Phenylalanine, tyrosine and try…
K00818	12523	15175	14241	10196	14506	11644	14694	15073	15322	17252	12454	14894	13031	11684	13575	13701	14775	11853	[["Metabolism", "Amino Acid Metabolism", "Amino acid related enzymes"], ["Metabolism", "Amino Acid Metabolism", "Arginine and proline metabolism"]]
K00819	6039	7876	7240	5010	6993	5557	7505	7042	6998	9088	7387	8431	7888	7856	8338	8594	8091	5759	[["Metabolism", "Amino Acid Metabolism", "Amino acid related enzymes"], ["Metabolism", "Amino Acid Metabolism", "Arginine and proline metabolism"]]
K02530	69	96	58	90	67	60	39	48	36	65	75	80	69	202	75	140	62	140	[["Genetic Information Processing", "Transcription", "Transcription factors"]]
K02245	183	142	80	158	103	199	72	68	58	93	138	102	270	267	175	224	120	337	[["Environmental Information Processing", "Membrane Transport", "Secretion system"]]
K02244	181	131	74	105	97	165	53	68	39	70	94	88	237	251	154	223	97	314	[["Environmental Information Processing", "Membrane Transport", "Secretion system"]]
K01499	615	582	694	381	749	539	429	616	603	429	693	508	421	468	726	673	532	599	[["Metabolism", "Energy Metabolism", "Methane metabolism"]]
K01498	0	0	0	0	0	0	0	0	0	0	0	0	0	0	0	0	0	0	[["Metabolism", "Metabolism of Cofactors and Vitamins", "Riboflavin metabolism"]]
K01493	4399	3756	3929	5501	4021	5560	3266	4425	4433	4167	4046	3086	3383	4248	3034	3810	3851	4708	[["Environmental Information Processing", "Membrane Transport", "Secretion system"], ["Metabolism", "Nucleotide Metabolism", "Pyrimidine metabolism"]]
K01492	17	40	27	271	5	85	30	20	71	41	125	30	36	125	44	85	47	88	[["Metabolism", "Nucleotide Metabolism", "Purine metabolism"]]
K01491	50162	59066	55920	48923	59274	49265	53113	56311	55839	61775	55769	60536	60185	56113	57664	57957	58310	53682	[["Metabolism", "Metabolism of Cofactors and Vitamins", "One carbon pool by folate"], ["Metabolism", "Energy Metabolism", "Carbon fixation pathways in prokaryotes"]]
K01497	18468	24302	22253	18263	25233	18983	24513	23546	25220	26748	23016	26105	22713	22814	22864	22442	24257	20321	[["Metabolism", "Metabolism of Cofactors and Vitamins", "Riboflavin metabolism"]]
K01496	13972	15243	14966	10098	14063	11057	12261	14458	13186	14711	13333	15402	14721	12785	14695	14460	15136	13070	[["Metabolism", "Amino Acid Metabolism", "Histidine metabolism"]]
K01495	23904	27330	25502	21376	28100	22676	24644	26128	25371	29023	25433	28036	28720	26602	28475	27177	27839	23992	[["Metabolism", "Metabolism of Cofactors and Vitamins", "Folate biosynthesis"]]
K01494	18212	21838	20332	16735	22498	17140	20189	20729	20400	23175	20800	23078	22544	20418	22342	21168	22186	18615	[["Metabolism", "Nucleotide Metabolism", "Pyrimidine metabolism"]]
K02418	6777	6905	6995	7196	8289	6099	5600	6685	6699	6508	8552	7654	9272	7894	7374	7248	7033	8190	[["Environmental Information Processing", "Membrane Transport", "Secretion system"], ["Cellular Processes", "Cell Motility", "Bacterial motility proteins"], ["Cellular Processes", "Cell Motility", "Flagellar assembly"]]
K02419	15416	18571	17567	16457	20374	15943	18228	18704	18800	20170	19270	20389	19476	18598	19114	17573	19360	16041	[["Environmental Information Processing", "Membrane Transport", "Secretion system"], ["Cellular Processes", "Cell Motility", "Bacterial motility proteins"], ["Cellular Processes", "Cell Motility", "Flagellar assembly"]]
K14492	0	0	0	0	0	0	0	0	0	0	0	0	0	0	0	0	0	0	[["None"]]
K02412	15303	18459	17523	16244	20187	15783	18165	18647	18749	20039	19110	20345	19308	18458	18940	17326	19208	15877	[["Environmental Information Processing", "Membrane Transport", "Secretion system"], ["Cellular Processes", "Cell Motility", "Bacterial motility proteins"], ["Cellular Processes", "Cell Motility", "Flagellar assembly"]]
K02413	4697	4677	4969	6547	6245	4973	3865	4935	4732	4580	5963	5135	6644	4465	5159	5289	5537	5264	[["Cellular Processes", "Cell Motility", "Bacterial motility proteins"], ["Cellular Processes", "Cell Motility", "Flagellar assembly"]]
K02410	15996	19187	18195	16793	20866	16374	18756	19341	19303	20732	19253	21109	19885	18531	19605	18054	19888	16325	[["Cellular Processes", "Cell Motility", "Bacterial motility proteins"], ["Cellular Processes", "Cell Motility", "Bacterial chemotaxis"], ["Cellular Processes", "Cell Motility", "Flagellar assembly"]]
K02411	13705	16522	15507	14355	17847	13695	16371	16542	16829	18557	16846	18540	17324	15868	16717	15282	17791	14348	[["Environmental Information Processing", "Membrane Transport", "Secretion system"], ["Cellular Processes", "Cell Motility", "Bacterial motility proteins"], ["Cellular Processes", "Cell Motility", "Flagellar assembly"]]
K02416	15096	18160	17207	16267	20024	15652	18158	18489	18641	19993	18444	20174	19187	17773	18712	17246	19137	15547	[["Cellular Processes", "Cell Motility", "Bacterial motility proteins"], ["Cellular Processes", "Cell Motility", "Bacterial chemotaxis"], ["Cellular Processes", "Cell Motility", "Flagellar assembly"]]
K02417	19683	24949	22844	21155	27405	21289	26107	25400	26072	28299	25524	27529	25318	25389	25860	23047	25823	20263	[["Environmental Information Processing", "Membrane Transport", "Secretion system"], ["Cellular Processes", "Cell Motility", "Bacterial motility proteins"], ["Cellular Processes", "Cell Motility", "Bacterial chemotaxis"], ["Cellular Processes", "Cell Motility", "Flagellar assembly"]]
K02414	3818	3703	4109	4927	5218	3790	3064	3869	3685	3660	4946	4010	5839	3549	4152	4300	4387	4361	[["Cellular Processes", "Cell Motility", "Bacterial motility proteins"], ["Cellular Processes", "Cell Motility", "Flagellar assembly"]]
K02415	13324	14797	14310	12253	15072	11670	12013	13926	12722	14066	14408	15733	15726	13807	15121	13521	14928	12887	[["Cellular Processes", "Cell Motility", "Bacterial motility proteins"]]
K00120	18	27	10	25	16	6	4	12	20	27	33	36	53	26	49	28	37	66	[["Metabolism", "Xenobiotics Biodegradation and Metabolism", "Polycyclic aromatic hydrocarbon degradation"], ["Metabolism", "Metabolism of Terpenoids and Polyketides", "Limonene and pinene degradation"], ["Metabolism", "Xenobiotics Biodegradation and Metabolism", "Chloroalkane and chloroalkene degradation"], ["Metabolism", "Xenobiotics Biodegradation and Metabolism", "Bisphenol degradation"], ["M…
K00121	29376	33081	32809	25750	34144	24832	28161	30655	29798	34013	33079	36112	38411	32349	36629	33524	31934	30791	[["Metabolism", "Lipid Metabolism", "Fatty acid metabolism"], ["Metabolism", "Xenobiotics Biodegradation and Metabolism", "Naphthalene degradation"], ["Metabolism", "Xenobiotics Biodegradation and Metabolism", "Chloroalkane and chloroalkene degradation"], ["Metabolism", "Carbohydrate Metabolism", "Glycolysis / Gluconeogenesis"], ["Metabolism", "Xenobiotics Biodegradation and Metabolism", "Metabol…
K00430	0	0	0	0	0	0	0	0	0	0	0	0	0	0	0	0	0	0	[["Metabolism", "Biosynthesis of Other Secondary Metabolites", "Phenylpropanoid biosynthesis"], ["Metabolism", "Amino Acid Metabolism", "Phenylalanine metabolism"], ["Metabolism", "Energy Metabolism", "Methane metabolism"]]
K13058	28	16	51	16	27	16	10	20	15	8	26	17	63	35	24	30	28	68	[["Unclassified", "Metabolism", "Carbohydrate metabolism"]]
K13059	43	74	26	21	40	27	36	53	26	19	10	1	26	82	26	21	59	52	[["Unclassified", "Metabolism", "Carbohydrate metabolism"]]
K13727	62	89	47	129	31	46	34	19	17	178	65	45	157	131	67	32	60	124	[["Unclassified", "Metabolism", "Biosynthesis and biodegradation of secondary metabolites"]]
K13057	524	571	616	517	713	464	565	729	910	490	317	474	335	257	487	417	490	267	[["Unclassified", "Metabolism", "Carbohydrate metabolism"]]
K13722	0	0	0	0	0	0	0	0	0	0	0	0	0	0	0	0	0	0	[["Metabolism", "Enzyme Families", "Peptidases"]]
K13051	6541	8425	8064	8109	11153	8234	10016	9389	10180	10157	8654	9561	10619	8278	9053	8448	9060	7098	[["Metabolism", "Enzyme Families", "Peptidases"]]
K13052	407	352	239	937	493	418	242	250	283	548	727	248	480	866	360	608	442	822	[["Genetic Information Processing", "Replication and Repair", "Chromosome"]]
K00435	507	553	520	417	462	381	398	328	374	546	563	553	818	587	621	660	440	677	[["Unclassified", "Genetic Information Processing", "Protein folding and associated processing"]]
K12054	0	0	0	0	0	0	0	0	0	0	0	0	0	0	0	0	0	0	[["Environmental Information Processing", "Membrane Transport", "Secretion system"]]
K03239	0	0	0	0	0	0	0	0	0	0	0	0	0	0	0	0	0	0	[["Genetic Information Processing", "Translation", "Translation factors"], ["Genetic Information Processing", "Translation", "RNA transport"]]
K03238	0	0	0	0	0	0	0	0	0	0	0	0	0	0	0	0	0	0	[["Genetic Information Processing", "Translation", "Translation factors"], ["Genetic Information Processing", "Translation", "RNA transport"]]
K03231	180	118	150	46	37	54	48	96	107	47	73	56	22	49	85	54	28	50	[["Genetic Information Processing", "Translation", "Translation factors"], ["Genetic Information Processing", "Translation", "RNA transport"]]
K03230	839	790	896	2013	857	767	790	905	822	923	2117	898	1337	1532	1063	815	910	1097	[["Environmental Information Processing", "Membrane Transport", "Secretion system"], ["Environmental Information Processing", "Membrane Transport", "Bacterial secretion system"]]
K03232	0	0	0	0	0	0	0	0	0	0	0	0	0	0	0	0	0	0	[["Genetic Information Processing", "Translation", "Translation factors"]]
K12059	2489	3196	3029	2087	3049	2255	2404	2811	3041	2914	2573	3310	3108	2795	2983	2843	2485	3383	[["Environmental Information Processing", "Membrane Transport", "Secretion system"]]
K03237	0	0	0	0	0	0	0	0	0	0	0	0	0	0	0	0	0	0	[["Human Diseases", "Infectious Diseases", "Measles"], ["Genetic Information Processing", "Folding, Sorting and Degradation", "Protein processing in endoplasmic reticulum"], ["Genetic Information Processing", "Translation", "Translation factors"], ["Human Diseases", "Infectious Diseases", "Hepatitis C"], ["Human Diseases", "Infectious Diseases", "Influenza A"], ["Genetic Information Processing", …
K03236	0	0	0	0	0	0	0	0	0	0	0	0	0	0	0	0	0	0	[["Genetic Information Processing", "Translation", "Translation factors"], ["Genetic Information Processing", "Translation", "RNA transport"]]
K12058	2599	3318	3093	3480	3224	2423	2511	2962	3147	2982	3350	3363	3189	2928	3056	2923	2570	3682	[["Environmental Information Processing", "Membrane Transport", "Secretion system"]]
K12239	0	3	4	2	0	2	0	0	0	0	1	0	0	0	0	0	0	2	[["Metabolism", "Metabolism of Terpenoids and Polyketides", "Biosynthesis of siderophore group nonribosomal peptides"]]
K12238	0	3	4	2	0	2	0	0	0	0	1	0	0	0	0	0	0	2	[["Metabolism", "Metabolism of Terpenoids and Polyketides", "Biosynthesis of siderophore group nonribosomal peptides"]]
K12235	0	0	0	0	0	0	0	0	0	0	0	0	0	0	0	0	0	0	[["Metabolism", "Amino Acid Metabolism", "Glycine, serine and threonine metabolism"]]
K12234	11068	13785	12385	7558	10146	7027	9598	9789	8957	14394	10914	13472	13156	10584	14004	13656	12606	9408	[["Metabolism", "Energy Metabolism", "Methane metabolism"]]
K13942	0	0	0	0	0	0	0	0	0	0	0	0	0	0	0	0	0	0	[["Metabolism", "Energy Metabolism", "Methane metabolism"]]
K13940	981	1025	964	1280	997	656	697	526	632	1668	1160	902	1114	1953	1330	1214	1174	1381	[["Metabolism", "Metabolism of Cofactors and Vitamins", "Folate biosynthesis"]]
K13941	40	33	32	18	28	40	33	54	38	9	21	22	22	3	20	20	86	62	[["Metabolism", "Metabolism of Cofactors and Vitamins", "Folate biosynthesis"]]
K12097	16	391	1	388	15	16	78	30	44	12	418	2	23	386	172	36	129	80	[["Environmental Information Processing", "Membrane Transport", "Secretion system"]]
K12096	16	391	1	388	15	16	78	30	44	12	418	2	23	386	172	36	129	80	[["Environmental Information Processing", "Membrane Transport", "Secretion system"]]
K12095	16	391	1	388	15	16	78	30	44	12	418	2	23	386	172	36	129	80	[["Environmental Information Processing", "Membrane Transport", "Secretion system"]]
K12094	16	391	1	388	15	16	78	30	44	12	418	2	23	386	172	36	129	80	[["Environmental Information Processing", "Membrane Transport", "Secretion system"]]
K12093	16	391	1	388	15	16	78	30	44	12	418	2	23	386	172	36	129	80	[["Environmental Information Processing", "Membrane Transport", "Secretion system"]]
K12092	16	391	1	388	15	16	78	30	44	12	418	2	23	386	172	36	129	80	[["Environmental Information Processing", "Membrane Transport", "Secretion system"]]
K12091	16	391	1	388	15	16	78	30	44	12	418	2	23	386	172	36	129	80	[["Environmental Information Processing", "Membrane Transport", "Secretion system"]]
K12090	16	391	1	388	15	16	78	30	44	12	418	2	23	386	172	36	129	80	[["Environmental Information Processing", "Membrane Transport", "Secretion system"]]
K12099	16	391	1	388	15	16	78	30	44	12	418	2	23	386	172	36	129	80	[["Environmental Information Processing", "Membrane Transport", "Secretion system"]]
K12098	16	391	1	388	15	16	78	30	44	12	418	2	23	386	172	36	129	80	[["Environmental Information Processing", "Membrane Transport", "Secretion system"]]
K06356	1	0	0	0	0	0	2	0	0	0	0	0	1	1	1	0	0	0	[["Unclassified", "Cellular Processes and Signaling", "Sporulation"]]
K05992	14	9	11	0	1	48	2	9	5	0	12	9	141	50	60	0	0	84	[["Unclassified", "Metabolism", "Others"]]
K03540	30	39	64	16	26	19	16	28	16	38	36	51	47	38	94	60	33	12	[["Genetic Information Processing", "Translation", "RNA transport"]]
K06331	72	62	109	714	55	206	32	45	54	95	349	56	80	120	104	97	19	345	[["Unclassified", "Cellular Processes and Signaling", "Sporulation"]]
K06330	191	216	170	114	320	136	240	346	349	192	165	189	284	301	198	137	173	224	[["Unclassified", "Cellular Processes and Signaling", "Sporulation"]]
K07138	812	933	870	2966	947	1542	713	999	938	1069	1696	878	591	1300	688	841	1054	1458	[["Unclassified", "Poorly Characterized", "General function prediction only"]]
K07139	3999	3595	3588	6424	3990	5024	3029	3814	3703	4285	4856	3549	3530	4329	2999	3887	4851	4351	[["Unclassified", "Poorly Characterized", "General function prediction only"]]
K11811	4361	4226	4331	3777	6042	4781	3774	4240	3868	3902	4900	4935	7520	5416	5777	5364	4690	4369	[["Unclassified", "Poorly Characterized", "General function prediction only"]]
K07132	712	350	421	708	376	591	344	373	473	634	753	630	504	916	548	683	501	554	[["Unclassified", "Poorly Characterized", "General function prediction only"]]
K07133	14586	14489	13473	17436	13162	16476	10932	13030	12505	15951	13984	13240	13808	15971	13286	14705	17472	14890	[["Unclassified", "Poorly Characterized", "General function prediction only"]]
K07130	13495	17734	16315	13984	16803	13187	16973	16745	16825	20065	16289	19393	17732	16126	18704	16805	17777	13773	[["Unclassified", "Poorly Characterized", "General function prediction only"]]
K07131	7092	9025	7738	4555	6029	4239	6405	5883	4959	9543	7869	8488	9173	5927	8535	11789	9128	5500	[["Unclassified", "Poorly Characterized", "General function prediction only"]]
K07137	9241	8719	8875	10163	9257	9172	7457	9057	9158	9127	9682	8435	8981	9052	7484	8707	9452	10450	[["Unclassified", "Poorly Characterized", "General function prediction only"]]
K07134	0	0	0	0	0	0	0	0	0	0	0	0	0	0	0	0	0	0	[["Unclassified", "Poorly Characterized", "General function prediction only"]]
K07135	0	0	0	0	0	0	0	0	0	0	0	0	0	0	0	0	0	0	[["Unclassified", "Poorly Characterized", "General function prediction only"]]
K01860	0	0	5	1	0	0	0	0	0	0	2	23	0	0	1	4	5	1	[["Metabolism", "Xenobiotics Biodegradation and Metabolism", "Toluene degradation"], ["Metabolism", "Xenobiotics Biodegradation and Metabolism", "Chlorocyclohexane and chlorobenzene degradation"], ["Metabolism", "Xenobiotics Biodegradation and Metabolism", "Fluorobenzoate degradation"]]
K01866	22236	25393	23953	21836	26302	22426	23459	24878	24612	27042	24388	26070	26075	24562	25379	24759	25745	22996	[["Genetic Information Processing", "Translation", "Aminoacyl-tRNA biosynthesis"], ["Metabolism", "Amino Acid Metabolism", "Amino acid related enzymes"]]
K01867	23567	27121	25314	22664	27404	23039	24435	25809	25367	28651	25906	27380	27653	25631	26794	27059	27439	24012	[["Genetic Information Processing", "Translation", "Aminoacyl-tRNA biosynthesis"], ["Metabolism", "Amino Acid Metabolism", "Amino acid related enzymes"], ["Metabolism", "Amino Acid Metabolism", "Tryptophan metabolism"]]
K01865	133	172	114	111	193	111	59	102	80	129	130	218	208	151	271	159	101	71	[["Unclassified", "Metabolism", "Others"]]
K01868	22738	26191	24530	22466	26743	22714	24087	25397	24956	27802	24986	26525	26848	24764	25720	25952	26587	23363	[["Genetic Information Processing", "Translation", "Aminoacyl-tRNA biosynthesis"], ["Metabolism", "Amino Acid Metabolism", "Amino acid related enzymes"]]
K01869	22055	25150	23734	21627	26083	22227	23202	24680	24419	26853	24205	25822	25678	24314	25120	24472	25548	22762	[["Genetic Information Processing", "Translation", "Aminoacyl-tRNA biosynthesis"], ["Metabolism", "Amino Acid Metabolism", "Amino acid related enzymes"], ["Metabolism", "Amino Acid Metabolism", "Valine, leucine and isoleucine biosynthesis"]]
K06140	5704	6406	6541	6476	8038	5920	6060	6534	6743	6850	7119	7649	9035	6943	7179	6756	7154	6996	[["Genetic Information Processing", "Transcription", "Transcription factors"]]
K04766	44	59	35	16	40	20	12	21	23	14	26	41	154	117	68	83	43	32	[["Unclassified", "Metabolism", "Carbohydrate metabolism"]]
K04767	2657	3081	2946	2575	2807	2363	2425	3325	3286	2758	2231	2986	2111	1698	2005	2215	3709	1841	[["Unclassified", "Metabolism", "Carbohydrate metabolism"]]
K04764	11300	11837	12156	10905	13873	11075	10947	12860	12439	11041	12027	12762	13558	11307	12023	11449	12549	11599	[["Genetic Information Processing", "Replication and Repair", "Chromosome"], ["Genetic Information Processing", "Replication and Repair", "DNA repair and recombination proteins"], ["Genetic Information Processing", "Replication and Repair", "DNA replication proteins"]]
K04762	15068	16879	16765	14843	19710	16507	17641	17833	18626	18413	17237	18443	18875	17921	18096	17221	16887	15407	[["Genetic Information Processing", "Folding, Sorting and Degradation", "Chaperones and folding catalysts"]]
K04763	25126	28216	26884	24646	29116	25725	25937	28387	27599	30029	27504	29269	28112	27198	27702	27447	28572	25790	[["Genetic Information Processing", "Replication and Repair", "Chromosome"]]
K04760	9783	10624	10917	9236	12656	9602	10036	11752	12080	9958	10427	10993	11921	9601	10348	10089	10488	10430	[["Genetic Information Processing", "Transcription", "Transcription machinery"]]
K04761	14603	16289	16081	14789	20563	16272	17171	17284	18021	18380	17392	18834	21406	18574	19014	17188	17443	15898	[["Genetic Information Processing", "Transcription", "Transcription factors"]]
K04768	4384	5404	4830	2668	3696	2624	3603	3702	2910	6097	4175	5556	5063	4128	5644	5344	5412	3361	[["Unclassified", "Metabolism", "Carbohydrate metabolism"]]
K04769	299	178	251	1457	272	549	266	112	290	682	991	237	441	920	368	353	392	913	[["Genetic Information Processing", "Transcription", "Transcription factors"]]
K08313	39	41	38	170	22	79	64	3	72	194	79	3	80	171	29	28	161	170	[["Unclassified", "Metabolism", "Carbohydrate metabolism"]]
K08312	1758	1740	1807	3063	3163	2249	1487	1869	1595	1899	2748	2297	4033	2207	2442	2360	2526	2422	[["Metabolism", "Nucleotide Metabolism", "Purine metabolism"]]
K08311	9013	9844	9717	8992	11342	8471	8690	9868	9488	8804	10486	10330	12007	10387	10801	9744	9314	10094	[["Genetic Information Processing", "Folding, Sorting and Degradation", "RNA degradation"]]
K08310	2563	2477	2713	2950	2875	2041	1968	2695	2598	2280	2921	2192	2947	1991	2898	2287	2418	2758	[["Unclassified", "Metabolism", "Nucleotide metabolism"]]
K08317	63	44	27	200	10	53	10	1	19	152	68	20	131	112	58	21	26	109	[["Unclassified", "Metabolism", "Energy metabolism"]]
K08316	12290	13492	13087	11398	14036	10732	10771	12411	11224	14012	13179	14274	16134	13841	14935	13942	13503	12908	[["Genetic Information Processing", "Translation", "Ribosome Biogenesis"]]
K08315	701	639	661	668	739	782	562	643	592	852	560	896	465	392	240	606	1546	760	[["Metabolism", "Enzyme Families", "Peptidases"]]
K08314	54	22	8	365	14	127	28	7	50	165	173	21	83	219	80	50	66	227	[["Unclassified", "Metabolism", "Carbohydrate metabolism"]]
K05149	0	0	0	0	0	0	0	0	0	0	0	0	0	0	0	0	0	0	[["Environmental Information Processing", "Signaling Molecules and Interaction", "Cytokine receptors"], ["Environmental Information Processing", "Signaling Molecules and Interaction", "Cellular antigens"], ["Environmental Information Processing", "Signaling Molecules and Interaction", "Cytokine-cytokine receptor interaction"]]
K08319	61	23	32	1417	40	47	13	18	30	26	780	27	45	90	63	37	50	98	[["Unclassified", "Metabolism", "Lipid metabolism"]]
K08318	2	5	4	118	4	18	2	0	1	51	29	0	1	6	0	2	4	35	[["Unclassified", "Metabolism", "Lipid metabolism"]]
K06339	1	0	0	0	0	0	2	0	0	0	0	0	1	1	1	0	0	0	[["Unclassified", "Cellular Processes and Signaling", "Sporulation"]]
K14648	0	0	0	0	0	0	0	0	0	0	0	0	0	0	0	0	0	0	[["None"]]
K14392	131	102	54	1622	214	304	66	48	96	195	963	88	116	419	225	84	127	324	[["Unclassified", "Cellular Processes and Signaling", "Other ion-coupled transporters"]]
K14393	13753	15132	15157	11680	13981	10495	12739	14580	13629	15292	14253	15154	13935	11812	13852	14145	15374	12513	[["Unclassified", "Cellular Processes and Signaling", "Other ion-coupled transporters"]]
K14645	3474	3169	3854	2714	5106	3590	3042	4073	4109	3024	3182	3416	3849	2482	3272	3311	3414	3363	[["None"]]
K14647	19	25	19	7	8	4	9	2	8	16	9	9	141	33	54	18	27	13	[["None"]]
K01689	22992	26030	24928	22711	26752	22890	23878	25604	25101	27752	25199	26796	26293	24938	25967	25674	26334	23493	[["Metabolism", "Carbohydrate Metabolism", "Glycolysis / Gluconeogenesis"], ["Genetic Information Processing", "Folding, Sorting and Degradation", "RNA degradation"], ["Metabolism", "Energy Metabolism", "Methane metabolism"]]
K01686	5047	5207	5249	6152	5463	5651	5404	5318	5404	5067	6465	4892	5114	6254	4943	4766	4914	5209	[["Metabolism", "Carbohydrate Metabolism", "Pentose and glucuronate interconversions"]]
K01687	37062	41825	41342	33297	42861	34237	39119	41401	40127	44767	40447	44530	42841	39977	42656	41040	41991	37465	[["Metabolism", "Metabolism of Cofactors and Vitamins", "Pantothenate and CoA biosynthesis"], ["Metabolism", "Amino Acid Metabolism", "Valine, leucine and isoleucine biosynthesis"]]
K01684	3340	4620	4267	3582	4322	3265	4562	4463	4511	4010	4094	3884	3679	3085	3271	4294	3894	3388	[["Metabolism", "Carbohydrate Metabolism", "Galactose metabolism"]]
K01685	6022	5919	6113	5583	5711	5710	5213	6074	5246	5606	6380	5640	5219	6406	6006	5541	5244	5476	[["Metabolism", "Carbohydrate Metabolism", "Pentose and glucuronate interconversions"]]
K01682	4147	4293	4636	5434	5206	4033	3406	4297	4122	3899	5475	4258	5520	4084	4277	4315	4472	5125	[["Metabolism", "Carbohydrate Metabolism", "Citrate cycle (TCA cycle)"], ["Metabolism", "Energy Metabolism", "Carbon fixation pathways in prokaryotes"], ["Metabolism", "Carbohydrate Metabolism", "Glyoxylate and dicarboxylate metabolism"]]
K01681	22751	25662	25194	22255	28481	23444	24105	25764	25312	28616	25705	28195	28762	24681	26667	26177	27135	23962	[["Metabolism", "Carbohydrate Metabolism", "Citrate cycle (TCA cycle)"], ["Metabolism", "Energy Metabolism", "Carbon fixation pathways in prokaryotes"], ["Metabolism", "Carbohydrate Metabolism", "Glyoxylate and dicarboxylate metabolism"]]
K05308	0	0	0	0	0	0	0	0	0	0	0	0	0	0	0	0	0	0	[["Metabolism", "Carbohydrate Metabolism", "Pentose phosphate pathway"]]
K02889	0	0	0	0	0	0	0	0	0	0	0	0	0	0	0	0	0	0	[["Genetic Information Processing", "Translation", "Ribosome"]]
K02888	21053	24121	22523	20851	24917	21103	22448	23262	23232	25930	23544	24932	24551	23577	24195	23364	24452	21579	[["Genetic Information Processing", "Translation", "Ribosome"]]
K02885	0	0	0	0	0	0	0	0	0	0	0	0	0	0	0	0	0	0	[["Genetic Information Processing", "Translation", "Ribosome"]]
K02884	21999	25098	23659	21609	26045	22192	23194	24660	24397	26800	24156	25757	25631	24257	25025	24410	25521	22725	[["Genetic Information Processing", "Translation", "Ribosome"]]
K02887	22011	25099	23659	21607	26045	22191	23185	24660	24396	26781	24156	25730	25631	24251	25011	24411	25511	22716	[["Genetic Information Processing", "Translation", "Ribosome"]]
K02886	21999	25098	23659	21609	26045	22192	23194	24660	24397	26800	24156	25757	25631	24257	25025	24410	25521	22725	[["Genetic Information Processing", "Translation", "Ribosome"]]
K02881	22012	25099	23659	21609	26044	22192	23194	24660	24400	26811	24156	25739	25631	24258	25011	24411	25521	22725	[["Genetic Information Processing", "Translation", "Ribosome"]]
K02883	0	0	0	0	0	0	0	0	0	0	0	0	0	0	0	0	0	0	[["Genetic Information Processing", "Translation", "Ribosome"]]
K13743	0	0	0	0	0	0	0	0	0	0	0	0	0	0	0	0	0	0	[["Human Diseases", "Infectious Diseases", "Bacterial invasion of epithelial cells"], ["Human Diseases", "Infectious Diseases", "Shigellosis"]]
K02086	185	132	86	129	103	168	49	68	44	74	124	106	241	250	167	225	107	326	[["Unclassified", "Genetic Information Processing", "Replication, recombination and repair proteins"]]
K02081	11677	17087	14861	13556	18413	14215	20633	17222	18912	23532	16532	19576	17475	17569	18388	16652	18281	12055	[["Genetic Information Processing", "Transcription", "Transcription factors"]]
K02080	0	1	2	37	0	24	0	0	1	1	15	0	3	1	0	0	0	28	[["Metabolism", "Carbohydrate Metabolism", "Galactose metabolism"]]
K02083	950	868	970	784	948	807	924	949	806	1059	1046	936	1186	1195	1140	828	1007	1061	[["Metabolism", "Enzyme Families", "Peptidases"], ["Metabolism", "Nucleotide Metabolism", "Purine metabolism"]]
K02082	3241	5232	4372	5492	6399	4816	6888	5734	6500	7225	5726	5974	5900	5646	5895	5013	5602	3712	[["Unclassified", "Cellular Processes and Signaling", "Membrane and intracellular structural molecules"]]
K13831	39	42	34	16	52	28	26	56	54	30	18	26	8	4	13	20	21	6	[["Metabolism", "Carbohydrate Metabolism", "Pentose and glucuronate interconversions"], ["Metabolism", "Energy Metabolism", "Methane metabolism"]]
K03428	126	164	242	112	103	74	143	128	108	145	185	119	110	168	93	100	112	387	[["Metabolism", "Metabolism of Cofactors and Vitamins", "Porphyrin and chlorophyll metabolism"]]
K03429	549	464	405	869	305	483	214	255	242	427	554	324	371	705	373	503	368	1411	[["Metabolism", "Glycan Biosynthesis and Metabolism", "Glycosyltransferases"], ["Metabolism", "Lipid Metabolism", "Glycerolipid metabolism"]]
K03424	28429	31142	30490	30056	33803	29637	28418	31705	31165	32852	31149	31484	33274	29748	31782	30807	32220	30016	[["Unclassified", "Genetic Information Processing", "Replication, recombination and repair proteins"]]
K03935	0	0	0	0	0	0	0	0	0	0	0	0	0	0	0	0	0	0	[["None"]]
K03932	3671	3789	3895	2220	3547	2759	2870	3939	3273	3267	2922	3386	3559	2874	3393	4115	3338	3213	[["Unclassified", "Metabolism", "Biosynthesis and biodegradation of secondary metabolites"]]
K03933	3091	4153	3463	3499	2655	1835	3123	2662	2197	3839	4268	3306	4234	2130	2800	5671	4046	2416	[["Unclassified", "Poorly Characterized", "Function unknown"]]
K03930	47	92	105	484	54	171	73	61	25	188	248	66	94	241	62	100	36	240	[["Unclassified", "Metabolism", "Others"]]
K03931	29	66	43	117	27	129	30	18	67	129	72	51	57	184	87	201	69	129	[["Unclassified", "Poorly Characterized", "Function unknown"]]
K02339	8743	9154	9389	8328	11010	8441	8363	9548	9215	8605	9877	10011	11503	9767	10344	9414	8933	9317	[["Metabolism", "Nucleotide Metabolism", "Pyrimidine metabolism"], ["Genetic Information Processing", "Replication and Repair", "DNA repair and recombination proteins"], ["Metabolism", "Nucleotide Metabolism", "Purine metabolism"], ["Genetic Information Processing", "Replication and Repair", "Mismatch repair"], ["Genetic Information Processing", "Replication and Repair", "Homologous recombination…
K02338	22251	25475	24149	21816	26377	22394	23432	24895	24643	27342	24528	26208	25945	24451	25413	24939	25884	23047	[["Metabolism", "Nucleotide Metabolism", "Pyrimidine metabolism"], ["Genetic Information Processing", "Replication and Repair", "DNA repair and recombination proteins"], ["Metabolism", "Nucleotide Metabolism", "Purine metabolism"], ["Genetic Information Processing", "Replication and Repair", "Mismatch repair"], ["Genetic Information Processing", "Replication and Repair", "Homologous recombination…
K02337	22833	25886	24485	22031	26752	22684	23804	25529	25116	27598	24777	26439	26282	24682	25612	25233	26314	23468	[["Metabolism", "Nucleotide Metabolism", "Pyrimidine metabolism"], ["Genetic Information Processing", "Replication and Repair", "DNA repair and recombination proteins"], ["Metabolism", "Nucleotide Metabolism", "Purine metabolism"], ["Genetic Information Processing", "Replication and Repair", "Mismatch repair"], ["Genetic Information Processing", "Replication and Repair", "Homologous recombination…
K02336	260	199	306	1671	202	232	80	113	175	274	1060	113	168	331	196	239	178	503	[["Genetic Information Processing", "Replication and Repair", "DNA repair and recombination proteins"]]
K02335	24015	27999	26161	23451	27660	23484	24803	26389	25840	29133	26466	27693	27760	25882	26928	27305	27837	24427	[["Metabolism", "Nucleotide Metabolism", "Pyrimidine metabolism"], ["Genetic Information Processing", "Replication and Repair", "DNA repair and recombination proteins"], ["Metabolism", "Nucleotide Metabolism", "Purine metabolism"], ["Genetic Information Processing", "Replication and Repair", "Homologous recombination"], ["Genetic Information Processing", "Replication and Repair", "Nucleotide exci…
K02334	22683	27562	25741	20933	29533	23186	28090	27858	28551	29983	26323	29609	26891	26743	28142	25820	27633	22172	[["Unclassified", "Genetic Information Processing", "Replication, recombination and repair proteins"]]
K02330	148	157	146	170	185	174	160	159	174	110	146	150	242	196	232	191	117	141	[["Genetic Information Processing", "Replication and Repair", "Base excision repair"], ["Genetic Information Processing", "Replication and Repair", "DNA repair and recombination proteins"]]
K03688	13848	15339	15431	13769	16661	12711	12947	15123	14652	14448	15311	16289	16916	14433	15074	14820	15220	15925	[["Metabolism", "Metabolism of Cofactors and Vitamins", "Ubiquinone and other terpenoid-quinone biosynthesis"]]
K03689	16	0	10	0	0	0	12	0	0	52	26	0	2	36	0	26	4	284	[["Metabolism", "Energy Metabolism", "Photosynthesis proteins"], ["Metabolism", "Energy Metabolism", "Photosynthesis"]]
K03680	38	20	16	12	54	72	6	52	44	18	24	21	49	34	5	22	8	84	[["Genetic Information Processing", "Translation", "Translation factors"], ["Genetic Information Processing", "Translation", "RNA transport"]]
K03683	1844	1791	1861	3104	3237	2292	1520	1945	1669	1922	2789	2325	4044	2225	2459	2398	2546	2489	[["Unclassified", "Genetic Information Processing", "Replication, recombination and repair proteins"]]
K03684	18485	20714	20173	15630	21207	15938	17541	19968	18586	19887	19032	21458	23230	20108	21681	20287	19357	18589	[["Unclassified", "Genetic Information Processing", "Translation proteins"]]
K03685	21323	24492	23040	21092	25326	21436	22633	24020	23830	26117	23657	24870	25180	23995	24821	23860	24041	22156	[["Genetic Information Processing", "Translation", "Ribosome biogenesis in eukaryotes"], ["Genetic Information Processing", "Translation", "Ribosome Biogenesis"]]
K03686	32009	38021	35265	32515	38832	32055	35910	36880	37273	42487	36153	39280	36585	35470	37361	36833	39457	32288	[["Genetic Information Processing", "Folding, Sorting and Degradation", "Chaperones and folding catalysts"]]
K03687	22555	25543	24120	21645	26500	22380	23514	25057	24777	27106	24485	26275	25983	24583	25582	25006	25922	22884	[["Genetic Information Processing", "Folding, Sorting and Degradation", "Chaperones and folding catalysts"]]
K07301	9976	10228	10527	10666	11196	9676	9535	11604	11355	9694	9381	9006	8497	8012	8415	9792	10605	8606	[["Unclassified", "Cellular Processes and Signaling", "Other ion-coupled transporters"]]
K07300	5543	6388	6248	4092	5788	4384	5869	5783	5526	6262	5833	5812	5605	5276	5507	6285	6022	4872	[["Unclassified", "Cellular Processes and Signaling", "Other ion-coupled transporters"]]
K07303	18316	20608	21481	15028	24347	18283	21055	23637	23847	20391	18454	20710	21307	17821	19777	19735	20114	18626	[["Unclassified", "Metabolism", "Energy metabolism"]]
K07302	20101	23365	23536	16798	27110	20156	23480	25765	26197	22926	20457	23083	24461	20175	22827	22044	22592	20283	[["Unclassified", "Metabolism", "Energy metabolism"]]
K07305	24139	29202	27211	21418	31239	23600	29007	29185	29878	32133	27766	31172	30483	28221	30579	28650	28832	24317	[["Unclassified", "Genetic Information Processing", "Protein folding and associated processing"]]
K07304	29048	35027	32956	26000	38015	28629	35140	35661	36342	37598	32648	37766	36344	33384	36029	33971	34781	29692	[["Unclassified", "Genetic Information Processing", "Protein folding and associated processing"]]
K07307	918	780	795	3579	861	966	717	728	729	1130	2301	964	647	725	451	666	1673	977	[["Unclassified", "Cellular Processes and Signaling", "Electron transfer carriers"]]
K07306	320	177	181	3121	164	211	99	77	130	383	1641	79	230	475	274	135	204	423	[["Unclassified", "Cellular Processes and Signaling", "Electron transfer carriers"]]
K07309	3	19	6	172	9	36	10	1	10	151	47	1	8	84	14	2	25	101	[["Metabolism", "Metabolism of Other Amino Acids", "Selenocompound metabolism"]]
K07308	1984	1894	1998	2777	1852	1482	1584	2063	1951	1951	2413	1643	1512	1804	1900	1561	1620	1621	[["Unclassified", "Cellular Processes and Signaling", "Electron transfer carriers"]]
K02617	307	382	432	384	388	357	157	281	267	382	372	319	338	425	443	415	276	438	[["Unclassified", "Poorly Characterized", "General function prediction only"]]
K02610	2937	3397	3415	3381	2662	1980	2310	2406	2037	3244	3825	3127	4263	2746	3573	4105	3414	3034	[["Unclassified", "Metabolism", "Biosynthesis and biodegradation of secondary metabolites"]]
K02963	22245	25350	23975	21739	26208	22306	23314	24814	24495	27170	24474	26015	25812	24396	25293	24816	25719	22881	[["Genetic Information Processing", "Translation", "Ribosome"]]
K02612	4382	4988	4889	4192	3866	2867	3534	3564	2917	5831	5065	5092	5958	4040	5764	5471	5330	4090	[["Unclassified", "Poorly Characterized", "General function prediction only"]]
K02961	21944	25036	23659	21499	25961	22070	23155	24609	24295	26540	23999	25719	25546	24200	25009	24217	25375	22639	[["Genetic Information Processing", "Translation", "Ribosome"]]
K09686	76448	91839	84580	72045	87319	70838	81241	81250	77378	105695	85938	95715	96489	80978	93538	94739	96800	72709	[["Environmental Information Processing", "Membrane Transport", "ABC transporters"], ["Environmental Information Processing", "Membrane Transport", "Transporters"]]
K09687	100649	123334	112678	88430	112989	85143	106141	105274	99525	143713	110371	128343	126110	106037	127572	127640	129110	93144	[["Environmental Information Processing", "Membrane Transport", "ABC transporters"], ["Environmental Information Processing", "Membrane Transport", "Transporters"]]
K09684	8381	9870	8868	4853	6705	4783	6172	6281	5019	12668	8428	10697	10255	8170	12233	9984	10490	6712	[["Genetic Information Processing", "Transcription", "Transcription factors"]]
K09685	221	168	115	207	143	213	64	67	84	97	181	123	267	396	256	255	172	554	[["Genetic Information Processing", "Transcription", "Transcription factors"]]
K09682	14	21	17	7	5	6	6	2	3	12	6	9	141	34	45	16	17	8	[["Genetic Information Processing", "Transcription", "Transcription factors"]]
K09683	7	7	3	3	3	2	4	1	3	9	5	5	6	4	9	9	14	6	[["Genetic Information Processing", "Transcription", "Transcription factors"]]
K09680	708	395	387	625	404	742	424	351	343	599	353	361	451	1092	486	538	402	396	[["Metabolism", "Metabolism of Cofactors and Vitamins", "Pantothenate and CoA biosynthesis"]]
K09681	38	24	33	16	20	15	22	5	8	21	33	36	174	90	79	152	33	77	[["Genetic Information Processing", "Transcription", "Transcription factors"]]
K09688	2174	3027	3111	2184	3010	2038	2733	2974	3424	2754	2464	3150	3321	2625	2463	2606	2446	3191	[["Environmental Information Processing", "Membrane Transport", "ABC transporters"], ["Environmental Information Processing", "Membrane Transport", "Transporters"]]
K09689	2207	3065	3184	2288	2984	2009	2876	3001	3488	2764	2502	3191	3401	2617	2411	2601	2473	3184	[["Environmental Information Processing", "Membrane Transport", "ABC transporters"], ["Environmental Information Processing", "Membrane Transport", "Transporters"]]
K05962	2026	1893	2267	1176	1912	1514	1819	2335	2521	1736	1214	1472	1217	968	1183	1462	1667	1405	[["Unclassified", "Cellular Processes and Signaling", "Signal transduction mechanisms"]]
K05961	6	7	2	3	2	2	1	1	3	7	4	4	7	3	9	9	14	6	[["Unclassified", "Metabolism", "Others"]]
K05967	56	60	84	28	32	27	24	33	21	57	49	59	188	148	182	76	58	21	[["Unclassified", "Poorly Characterized", "Function unknown"]]
K05966	810	732	859	2121	856	699	516	674	709	782	1703	607	580	813	956	854	716	1074	[["Environmental Information Processing", "Signal Transduction", "Two-component system"]]
K11159	1530	1481	1720	1090	1383	1108	1311	1326	1226	1940	2098	1722	1567	1604	1851	1801	1764	1438	[["Unclassified", "Metabolism", "Biosynthesis and biodegradation of secondary metabolites"]]
K05964	315	205	183	1710	136	352	127	120	135	333	924	98	218	480	262	185	235	502	[["Environmental Information Processing", "Signal Transduction", "Two-component system"]]
K05968	11	26	14	34	6	1	7	1	9	101	17	1	129	106	48	1	24	66	[["Unclassified", "Metabolism", "Others"]]
K11152	0	0	0	0	0	0	0	0	0	0	0	0	0	0	0	0	0	0	[["None"]]
K00309	93	136	93	60	95	60	52	52	42	131	178	164	140	206	159	142	104	160	[["Unclassified", "Metabolism", "Others"]]
K00658	20113	23517	22771	17405	24784	18757	22056	23833	23460	24834	21364	24502	24686	21208	23933	23046	23275	19744	[["Metabolism", "Amino Acid Metabolism", "Lysine degradation"], ["Metabolism", "Carbohydrate Metabolism", "Citrate cycle (TCA cycle)"]]
K00304	3482	4151	4630	2970	4287	3495	3501	4044	3630	3470	3876	4415	4648	4452	4650	4397	3528	3647	[["Metabolism", "Amino Acid Metabolism", "Glycine, serine and threonine metabolism"]]
K00305	3282	3864	4421	2743	4032	3267	3310	3809	3327	3297	3618	4140	4194	4039	4287	4082	3340	3465	[["Metabolism", "Amino Acid Metabolism", "Glycine, serine and threonine metabolism"]]
K00654	0	0	0	0	0	0	0	0	0	0	0	0	0	0	0	0	0	0	[["Metabolism", "Amino Acid Metabolism", "Amino acid related enzymes"], ["Metabolism", "Lipid Metabolism", "Sphingolipid metabolism"]]
K00655	46160	54037	51734	41427	55854	45582	51343	54301	53658	60699	50172	57674	53378	50559	54860	52204	54693	46404	[["Metabolism", "Lipid Metabolism", "Glycerophospholipid metabolism"], ["Metabolism", "Lipid Metabolism", "Glycerolipid metabolism"], ["Metabolism", "Lipid Metabolism", "Lipid biosynthesis proteins"]]
K00652	14714	15306	15056	13672	15925	13270	12782	14248	13793	15718	15712	15823	17242	15387	16291	15621	15285	14490	[["Metabolism", "Metabolism of Cofactors and Vitamins", "Biotin metabolism"], ["Metabolism", "Amino Acid Metabolism", "Amino acid related enzymes"]]
K00301	6243	7627	7416	4606	6721	5097	6632	6808	6239	8149	6223	7918	7209	6356	7742	6393	7201	5367	[["Metabolism", "Amino Acid Metabolism", "Glycine, serine and threonine metabolism"]]
K00302	4733	5420	6167	4146	5648	4506	4778	5774	5295	4786	4762	5520	5495	5340	5654	5263	4482	4725	[["Metabolism", "Amino Acid Metabolism", "Glycine, serine and threonine metabolism"]]
K00303	11463	13876	13941	8487	12780	9668	11877	13146	12115	13161	11099	13920	12202	11169	13436	12366	12574	9594	[["Metabolism", "Amino Acid Metabolism", "Glycine, serine and threonine metabolism"]]
K10828	1	0	1	0	0	1	0	0	1	0	1	0	1	0	0	0	0	5	[["Unclassified", "Metabolism", "Energy metabolism"]]
K06431	13	18	13	4	5	3	6	2	3	10	5	5	133	30	44	9	15	6	[["Unclassified", "Cellular Processes and Signaling", "Sporulation"]]
K06432	13	18	13	4	5	3	6	2	3	10	5	5	133	30	44	9	15	6	[["Unclassified", "Cellular Processes and Signaling", "Sporulation"]]
K06433	15	18	14	4	5	3	6	2	3	10	6	6	135	30	46	10	18	7	[["Unclassified", "Cellular Processes and Signaling", "Sporulation"]]
K06434	21	25	30	8	13	14	6	3	4	15	9	11	142	38	51	23	31	23	[["Unclassified", "Cellular Processes and Signaling", "Sporulation"]]
K06436	57	57	67	162	39	63	10	10	35	85	108	58	168	130	69	46	44	134	[["Unclassified", "Cellular Processes and Signaling", "Sporulation"]]
K06437	9	9	11	0	1	0	2	0	0	0	0	0	125	26	35	0	0	0	[["Unclassified", "Cellular Processes and Signaling", "Sporulation"]]
K10820	224	269	361	116	154	145	170	179	100	377	256	298	208	156	314	506	169	162	[["Unclassified", "Metabolism", "Energy metabolism"]]
K06439	11	10	14	2	6	4	5	0	0	2	2	1	128	27	37	3	8	8	[["Unclassified", "Cellular Processes and Signaling", "Sporulation"]]
K10822	24	2	16	7	22	36	0	2	17	2	7	11	8	2	15	1	17	13	[["Unclassified", "Metabolism", "Energy metabolism"]]
K10823	0	0	0	0	0	0	0	0	0	0	0	0	0	0	0	0	0	0	[["None"]]
K10826	1252	1658	1466	760	1227	914	756	970	851	1267	1180	1750	1207	1627	2060	1954	1353	1036	[["Unclassified", "Metabolism", "Energy metabolism"]]
K09167	4265	5114	4470	2760	3340	2513	3186	3200	2661	5831	4196	4965	5152	4120	5521	5073	5215	3655	[["Unclassified", "Poorly Characterized", "Function unknown"]]
K06322	1	0	0	0	1	0	4	0	0	2	0	1	2	1	2	0	0	1	[["Unclassified", "Cellular Processes and Signaling", "Sporulation"]]
K14117	0	0	0	0	0	0	0	0	0	0	0	0	0	0	0	0	0	0	[["Metabolism", "Energy Metabolism", "Methane metabolism"]]
K14259	0	0	0	0	0	0	0	0	0	0	0	0	0	0	0	0	0	0	[["Metabolism", "Carbohydrate Metabolism", "Pentose and glucuronate interconversions"]]
K14257	95	68	73	42	68	64	16	25	33	42	118	106	83	76	83	224	83	70	[["Metabolism", "Metabolism of Terpenoids and Polyketides", "Biosynthesis of type II polyketide products"], ["Metabolism", "Metabolism of Terpenoids and Polyketides", "Tetracycline biosynthesis"]]
K01308	70	53	56	300	56	62	29	8	36	165	257	39	196	252	86	96	44	165	[["Metabolism", "Enzyme Families", "Peptidases"]]
K01303	405	270	191	255	342	300	252	250	243	240	247	229	772	380	445	248	260	234	[["Metabolism", "Enzyme Families", "Peptidases"]]
K01301	6165	10157	8557	7347	11917	8874	13596	11306	12951	12850	9071	11159	9268	9701	9942	8900	10356	6487	[["Metabolism", "Enzyme Families", "Peptidases"]]
K01305	71	44	80	148	173	261	110	48	123	274	279	74	84	300	69	98	138	159	[["Metabolism", "Enzyme Families", "Peptidases"]]
K01304	2141	2198	2405	1450	1837	1586	1691	1914	1697	2320	2098	2380	2422	2437	2474	2307	2214	2576	[["Metabolism", "Enzyme Families", "Peptidases"]]
K02658	5411	5176	5678	4844	7902	6027	4608	5510	5211	5559	5911	6756	8437	5001	5415	6296	7315	6904	[["Environmental Information Processing", "Membrane Transport", "Secretion system"], ["Cellular Processes", "Cell Motility", "Bacterial motility proteins"], ["Environmental Information Processing", "Signal Transduction", "Two-component system"]]
K00672	615	582	692	381	749	539	429	616	603	429	692	507	421	468	726	673	532	599	[["Metabolism", "Energy Metabolism", "Methane metabolism"]]
K02650	8103	7996	8730	6739	11044	8105	7132	9284	8971	8020	7462	8783	10843	6946	8706	8288	9826	9078	[["Environmental Information Processing", "Membrane Transport", "Secretion system"], ["Cellular Processes", "Cell Motility", "Bacterial motility proteins"], ["Environmental Information Processing", "Signal Transduction", "Two-component system"]]
K02651	15750	18840	18236	14163	20336	16245	19602	19150	19900	21103	18603	21729	20674	20801	21569	18648	18416	16720	[["Environmental Information Processing", "Membrane Transport", "Secretion system"], ["Cellular Processes", "Cell Motility", "Bacterial motility proteins"], ["Cellular Processes", "Cell Growth and Death", "Cell cycle - Caulobacter"]]
K02652	14386	16874	16410	12956	18720	14886	16535	18252	18194	18925	14926	18153	15770	13344	15863	15763	19438	14339	[["Environmental Information Processing", "Membrane Transport", "Secretion system"], ["Cellular Processes", "Cell Motility", "Bacterial motility proteins"]]
K02653	13258	15542	15163	12815	17263	13796	15727	17066	17350	17726	14230	16555	15193	12798	14819	14369	17168	13454	[["Environmental Information Processing", "Membrane Transport", "Secretion system"], ["Cellular Processes", "Cell Motility", "Bacterial motility proteins"]]
K02654	35795	41588	39552	33242	43324	33664	38093	40461	39849	46288	40068	43414	42581	37858	42058	41921	44119	35781	[["Environmental Information Processing", "Membrane Transport", "Secretion system"], ["Metabolism", "Enzyme Families", "Peptidases"], ["Cellular Processes", "Cell Motility", "Bacterial motility proteins"]]
K05687	0	0	0	0	0	0	0	0	0	0	0	0	0	0	0	0	0	0	[["Metabolism", "Enzyme Families", "Peptidases"], ["Human Diseases", "Neurodegenerative Diseases", "Parkinson's disease"]]
K02656	3584	3423	3838	3149	5013	3636	3007	3810	3597	3298	3894	3902	5406	3270	4181	3900	4117	4121	[["Environmental Information Processing", "Membrane Transport", "Secretion system"], ["Cellular Processes", "Cell Motility", "Bacterial motility proteins"]]
K05685	655	594	722	1882	613	506	272	481	472	831	1410	488	381	776	879	642	586	1266	[["Environmental Information Processing", "Membrane Transport", "ABC transporters"], ["Environmental Information Processing", "Membrane Transport", "Transporters"]]
K00878	1682	2030	1540	2766	1532	1766	1270	1285	1304	1880	2553	1497	2126	2805	1844	1811	1626	2309	[["Metabolism", "Metabolism of Cofactors and Vitamins", "Thiamine metabolism"]]
K00879	37	31	9	239	6	70	98	3	24	258	203	36	74	181	39	9	43	205	[["Metabolism", "Carbohydrate Metabolism", "Fructose and mannose metabolism"]]
K00872	10497	13810	12005	10998	14257	10678	12955	12346	12572	15984	13014	14375	14598	12987	14499	13582	14156	10762	[["Metabolism", "Amino Acid Metabolism", "Glycine, serine and threonine metabolism"]]
K00873	22532	25019	24364	23026	26164	22013	23703	24557	24403	27882	25744	26703	25922	24748	25909	24906	25934	23548	[["Metabolism", "Carbohydrate Metabolism", "Glycolysis / Gluconeogenesis"], ["Metabolism", "Carbohydrate Metabolism", "Pyruvate metabolism"], ["Human Diseases", "Metabolic Diseases", "Type II diabetes mellitus"], ["Metabolism", "Energy Metabolism", "Carbon fixation in photosynthetic organisms"], ["Metabolism", "Nucleotide Metabolism", "Purine metabolism"]]
K00870	16	0	10	5	0	0	12	0	0	52	26	5	2	36	52	26	4	295	[["Unclassified", "Cellular Processes and Signaling", "Signal transduction mechanisms"]]
K00876	9081	10285	9189	11962	10761	11693	11144	9982	11121	12880	11065	10388	9920	11634	10194	10932	10385	9578	[["Metabolism", "Nucleotide Metabolism", "Pyrimidine metabolism"], ["Metabolism", "Xenobiotics Biodegradation and Metabolism", "Drug metabolism - other enzymes"]]
K00877	0	0	0	0	0	0	0	0	0	0	0	0	0	0	0	0	0	0	[["Metabolism", "Metabolism of Cofactors and Vitamins", "Thiamine metabolism"]]
K00874	15007	17725	16622	15854	17587	14895	17026	16635	16819	20103	17876	18487	17451	17603	17752	17516	16733	15438	[["Metabolism", "Carbohydrate Metabolism", "Pentose phosphate pathway"], ["Metabolism", "Carbohydrate Metabolism", "Pentose and glucuronate interconversions"]]
K00875	124	106	166	113	142	86	101	93	89	114	142	134	188	201	222	183	134	170	[["Metabolism", "Carbohydrate Metabolism", "Pentose and glucuronate interconversions"]]
K04487	35675	42728	40438	33801	42363	32864	40611	42768	43533	45782	40005	43465	38277	38416	39717	39950	41071	37299	[["Metabolism", "Metabolism of Cofactors and Vitamins", "Thiamine metabolism"], ["Genetic Information Processing", "Folding, Sorting and Degradation", "Sulfur relay system"]]
K04486	2695	2952	2644	3760	2259	2391	2106	1999	1847	4392	3570	3170	3028	3555	3684	3032	3318	3307	[["Metabolism", "Amino Acid Metabolism", "Histidine metabolism"]]
K04485	18919	19948	19444	17766	19939	17444	16033	18740	17566	19961	19336	19751	21155	19184	19929	19773	20176	19437	[["Genetic Information Processing", "Replication and Repair", "DNA repair and recombination proteins"]]
K04484	0	0	0	0	0	0	0	0	0	0	0	0	0	0	0	0	0	0	[["Genetic Information Processing", "Replication and Repair", "DNA repair and recombination proteins"]]
K04483	0	0	0	0	0	0	0	0	0	0	0	0	0	0	0	0	0	0	[["Genetic Information Processing", "Replication and Repair", "DNA repair and recombination proteins"]]
K04482	0	0	0	0	0	0	0	0	0	0	0	0	0	0	0	0	0	0	[["Human Diseases", "Cancers", "Pathways in cancer"], ["Genetic Information Processing", "Folding, Sorting and Degradation", "Ubiquitin system"], ["Genetic Information Processing", "Replication and Repair", "Homologous recombination"], ["Human Diseases", "Cancers", "Pancreatic cancer"], ["Genetic Information Processing", "Replication and Repair", "DNA repair and recombination proteins"]]
K04480	0	0	3	0	0	2	0	0	1	0	1	2	1	0	0	0	0	0	[["Metabolism", "Energy Metabolism", "Methane metabolism"]]
K04488	15583	18943	17909	15848	18976	15023	18215	19168	19420	20813	17386	18443	16413	15728	17878	17312	18652	15726	[["Unclassified", "Metabolism", "Energy metabolism"]]
K12049	16	392	1	389	15	16	78	30	44	12	419	2	23	386	172	38	129	80	[["Environmental Information Processing", "Membrane Transport", "Secretion system"]]
K13693	3042	3762	3353	1877	2523	1779	2597	2545	1907	4888	3240	3893	3950	2798	4216	4056	4218	2385	[["Metabolism", "Glycan Biosynthesis and Metabolism", "Glycosyltransferases"]]
K13706	0	0	0	0	0	0	0	0	0	0	0	0	0	0	0	0	0	0	[["None"]]
K13694	680	640	693	2172	600	737	534	662	630	717	1291	454	536	716	435	685	632	740	[["Metabolism", "Enzyme Families", "Peptidases"]]
K13695	106	94	87	1615	112	128	51	32	66	224	895	179	236	317	145	109	128	351	[["Metabolism", "Enzyme Families", "Peptidases"]]
K05977	5	10	11	17	11	11	2	6	14	6	11	3	8	21	17	9	18	54	[["Unclassified", "Metabolism", "Others"]]
K09516	1546	1376	1391	1122	1367	1345	1351	1385	1498	1395	1029	1059	1138	1150	1004	1518	1138	1133	[["Metabolism", "Metabolism of Cofactors and Vitamins", "Retinol metabolism"]]
K02434	39340	46367	43644	33703	45716	36385	42759	46143	45437	48075	41310	46468	42075	40740	44091	42887	45297	39196	[["Genetic Information Processing", "Translation", "Aminoacyl-tRNA biosynthesis"]]
K02435	38776	45871	43205	33235	45221	35851	42344	45477	44886	47548	40707	46121	41600	40434	43776	42395	44865	38397	[["Genetic Information Processing", "Translation", "Aminoacyl-tRNA biosynthesis"]]
K02436	1	21	5	179	5	1	7	1	10	104	72	1	6	83	14	0	21	107	[["Genetic Information Processing", "Transcription", "Transcription factors"]]
K02437	21376	24492	23561	19423	25132	20975	22683	24021	23742	25990	22762	25764	24565	22608	24300	23539	24887	20821	[["Unclassified", "Metabolism", "Amino acid metabolism"]]
K05350	15497	19717	17755	12771	18068	13364	18223	17606	17482	21854	16133	19606	18684	15439	19024	20484	20307	13830	[["Metabolism", "Metabolism of Other Amino Acids", "Cyanoamino acid metabolism"], ["Metabolism", "Carbohydrate Metabolism", "Starch and sucrose metabolism"], ["Metabolism", "Biosynthesis of Other Secondary Metabolites", "Phenylpropanoid biosynthesis"]]
K02431	1152	1309	1544	1631	1308	1195	1130	1126	1125	1642	1787	1461	1943	2037	1533	1393	1393	1850	[["Unclassified", "Metabolism", "Carbohydrate metabolism"]]
K08100	958	914	1096	529	905	627	736	1022	926	935	712	915	937	578	778	934	925	892	[["Metabolism", "Metabolism of Cofactors and Vitamins", "Porphyrin and chlorophyll metabolism"]]
K02433	77043	90156	87737	64092	91945	73084	84754	91143	87176	97659	82593	97400	88454	83159	94044	89373	91055	74589	[["Genetic Information Processing", "Translation", "Aminoacyl-tRNA biosynthesis"]]
K02438	21497	26635	24976	21323	28848	21884	27437	26481	27907	31496	26732	29665	26392	27446	28669	26845	27314	20810	[["Unclassified", "Metabolism", "Carbohydrate metabolism"]]
K02439	311	298	188	1704	337	219	106	165	200	338	1160	188	121	462	118	334	308	565	[["Unclassified", "Cellular Processes and Signaling", "Inorganic ion transport and metabolism"]]
K03745	4741	4972	5545	5854	7254	5460	4961	5492	5232	4960	5978	5680	7456	5844	6869	5965	5682	5109	[["Unclassified", "Poorly Characterized", "Function unknown"]]
K03744	22015	24989	24392	22331	27200	23715	23780	25926	25232	26910	23911	26385	27884	23240	25355	25025	26629	23212	[["Unclassified", "Poorly Characterized", "Function unknown"]]
K03747	3409	3134	3682	3165	4604	3489	2924	3680	3438	3249	3740	3734	4407	2995	3543	3515	3833	3788	[["Unclassified", "Poorly Characterized", "Function unknown"]]
K03210	19781	22571	21332	20319	24416	20854	21524	22963	23069	23606	22327	23049	23369	22184	21991	22487	23077	20816	[["Environmental Information Processing", "Membrane Transport", "Secretion system"], ["Genetic Information Processing", "Folding, Sorting and Degradation", "Protein export"], ["Environmental Information Processing", "Membrane Transport", "Bacterial secretion system"]]
K03217	23495	27010	25186	22532	27316	23028	24422	25859	25307	28483	25580	27293	27432	25377	26501	26990	27332	23876	[["Environmental Information Processing", "Membrane Transport", "Secretion system"], ["Genetic Information Processing", "Folding, Sorting and Degradation", "Protein export"], ["Environmental Information Processing", "Membrane Transport", "Bacterial secretion system"]]
K03216	10519	10968	10991	11459	12498	10084	9579	11063	10744	10818	12371	11593	12810	12028	11665	11180	10952	12317	[["Unclassified", "Genetic Information Processing", "Translation proteins"]]
K03215	13927	16473	16305	14209	19488	15074	17303	18547	18982	17433	16122	17955	17831	15855	16889	15859	16437	14505	[["Genetic Information Processing", "Translation", "Ribosome Biogenesis"]]
K03742	9474	11360	10416	11495	11409	10505	11884	11476	12189	14135	11317	12031	9927	11280	11487	10183	11415	9325	[["Unclassified", "Poorly Characterized", "General function prediction only"]]
K03219	214	143	227	1487	167	176	32	101	105	84	1433	96	143	746	136	124	105	432	[["Environmental Information Processing", "Membrane Transport", "Secretion system"], ["Environmental Information Processing", "Membrane Transport", "Bacterial secretion system"]]
K03218	21443	24981	23566	21177	25785	21428	22887	24478	24098	26527	24054	25667	25242	23424	24755	24283	25237	22472	[["Genetic Information Processing", "Translation", "Ribosome Biogenesis"]]
K03749	2185	2056	2376	2833	2139	1685	1644	2232	2271	1876	2631	1841	1628	1520	1584	1941	2041	2439	[["Unclassified", "Poorly Characterized", "Function unknown"]]
K03748	162	97	66	1687	87	95	64	45	90	192	910	52	96	306	154	96	118	319	[["Unclassified", "Poorly Characterized", "Function unknown"]]
K02383	4	2	1	2	25	32	12	4	16	0	0	18	8	0	16	0	2	0	[["Cellular Processes", "Cell Motility", "Bacterial motility proteins"]]
K06327	19	18	16	4	5	4	4	2	3	12	6	6	135	34	46	11	20	7	[["Unclassified", "Cellular Processes and Signaling", "Sporulation"]]
K06320	108	110	61	518	138	180	68	106	62	158	260	10	76	43	77	363	135	276	[["Unclassified", "Cellular Processes and Signaling", "Sporulation"]]
K07238	9305	9685	9363	8693	9366	8908	7510	9059	8604	10888	9799	10231	8920	9585	8997	9777	10532	10821	[["Unclassified", "Cellular Processes and Signaling", "Other ion-coupled transporters"]]
K09479	0	0	0	0	0	0	0	0	0	0	0	0	0	0	0	0	0	0	[["Metabolism", "Lipid Metabolism", "Fatty acid metabolism"]]
K09478	78	61	63	112	129	255	87	113	193	93	206	245	176	245	269	314	194	95	[["Metabolism", "Lipid Metabolism", "Fatty acid metabolism"], ["Metabolism", "Amino Acid Metabolism", "Valine, leucine and isoleucine degradation"]]
K09475	3	23	7	153	9	18	10	1	10	152	50	1	8	86	14	2	25	101	[["Environmental Information Processing", "Signal Transduction", "Two-component system"]]
K09474	3161	3544	3767	2893	3688	3456	3168	3887	3886	3778	2976	3764	4410	3828	3090	3445	3225	4411	[["Metabolism", "Metabolism of Cofactors and Vitamins", "Riboflavin metabolism"], ["Metabolism", "Xenobiotics Biodegradation and Metabolism", "Aminobenzoate degradation"], ["Environmental Information Processing", "Signal Transduction", "Two-component system"]]
K09477	16	392	3	427	15	17	78	30	45	12	436	2	23	387	172	37	131	89	[["Environmental Information Processing", "Signal Transduction", "Two-component system"]]
K09476	56	45	37	1507	46	63	24	19	39	176	816	24	54	174	64	39	74	139	[["Environmental Information Processing", "Signal Transduction", "Two-component system"]]
K09471	4502	4478	4695	5153	6626	4973	4137	4864	4396	4068	5386	5059	7109	4890	6127	5134	4684	4424	[["Metabolism", "Amino Acid Metabolism", "Arginine and proline metabolism"]]
K09470	3	19	4	90	8	0	9	2	10	150	30	1	8	92	14	4	21	134	[["Metabolism", "Amino Acid Metabolism", "Arginine and proline metabolism"]]
K09473	3	19	4	90	8	0	8	1	9	150	27	1	7	81	14	2	21	91	[["Metabolism", "Enzyme Families", "Peptidases"], ["Metabolism", "Amino Acid Metabolism", "Arginine and proline metabolism"]]
K09472	1473	1426	1765	868	1475	1078	918	1220	1201	1054	1432	1211	1745	1041	1357	1260	1050	1910	[["Metabolism", "Amino Acid Metabolism", "Arginine and proline metabolism"]]
K07543	27	30	28	17	17	19	4	10	5	37	30	51	31	45	24	23	33	19	[["Metabolism", "Xenobiotics Biodegradation and Metabolism", "Toluene degradation"]]
K06898	7224	9853	8736	7853	10015	7928	10361	10131	10530	12346	8783	10584	7949	8837	9938	8300	9841	6797	[["Unclassified", "Poorly Characterized", "General function prediction only"]]
K13967	8	14	11	0	13	5	1	4	0	6	29	25	19	13	40	9	7	67	[["Metabolism", "Carbohydrate Metabolism", "Amino sugar and nucleotide sugar metabolism"]]
K13963	1984	1888	2426	1934	1645	1393	1493	2187	1973	1865	1594	1433	1360	1109	1049	1456	1376	1574	[["Human Diseases", "Infectious Diseases", "Amoebiasis"]]
K07545	2	11	15	4	4	15	0	4	3	0	0	5	6	4	12	2	3	2	[["Metabolism", "Xenobiotics Biodegradation and Metabolism", "Toluene degradation"]]
K00737	161	199	211	600	228	301	182	198	199	189	224	163	246	246	268	229	139	344	[["Metabolism", "Glycan Biosynthesis and Metabolism", "Glycosyltransferases"], ["Metabolism", "Glycan Biosynthesis and Metabolism", "N-Glycan biosynthesis"]]
K05345	405	302	365	235	319	228	292	304	348	307	425	256	307	291	374	295	239	420	[["Unclassified", "Metabolism", "Others"]]
K11706	26	32	4	22	10	0	11	6	3	3	7	9	14	31	23	43	4	5	[["Environmental Information Processing", "Membrane Transport", "ABC transporters"], ["Environmental Information Processing", "Membrane Transport", "Transporters"]]
K11707	238	268	282	232	341	216	226	221	221	182	217	262	758	335	451	335	224	325	[["Environmental Information Processing", "Membrane Transport", "ABC transporters"], ["Environmental Information Processing", "Membrane Transport", "Transporters"]]
K11704	26	32	4	22	10	0	11	6	3	3	7	9	14	31	23	43	4	5	[["Environmental Information Processing", "Membrane Transport", "ABC transporters"], ["Environmental Information Processing", "Membrane Transport", "Transporters"]]
K11705	26	32	4	22	10	0	11	6	3	3	7	9	14	31	23	43	4	5	[["Environmental Information Processing", "Membrane Transport", "ABC transporters"], ["Environmental Information Processing", "Membrane Transport", "Transporters"]]
K11708	230	267	280	229	337	215	222	215	218	177	215	260	758	333	451	335	224	323	[["Environmental Information Processing", "Membrane Transport", "ABC transporters"], ["Environmental Information Processing", "Membrane Transport", "Transporters"]]
K11709	214	238	282	207	309	216	226	213	209	182	217	247	736	295	433	335	224	325	[["Environmental Information Processing", "Membrane Transport", "ABC transporters"], ["Environmental Information Processing", "Membrane Transport", "Transporters"]]
K05588	0	2	1	2	0	2	2	0	5	1	1	4	0	0	2	0	1	4	[["Metabolism", "Energy Metabolism", "Oxidative phosphorylation"]]
K07114	40101	46969	45984	35392	52858	43437	48943	52430	53271	51711	40088	47727	48105	40576	45105	46218	47442	37842	[["Unclassified", "Poorly Characterized", "General function prediction only"]]
K07443	6066	7851	7440	7177	10389	8289	9512	8923	9793	9033	7632	8744	9178	8020	8181	7792	8297	7079	[["Unclassified", "Genetic Information Processing", "Replication, recombination and repair proteins"]]
K07116	3430	4250	3738	2905	4866	3248	4009	3932	4124	4809	4597	4246	4923	4264	5043	4371	4410	3014	[["Unclassified", "Poorly Characterized", "General function prediction only"]]
K07117	8034	10223	10049	7477	12819	9805	11362	11444	11820	12026	9552	11670	11656	9546	10743	10581	11374	8632	[["Unclassified", "Poorly Characterized", "General function prediction only"]]
K07110	9111	9994	10154	7025	9974	7185	9289	10110	10143	9078	9784	10448	10410	10105	9343	9291	8191	9713	[["Unclassified", "Poorly Characterized", "General function prediction only"]]
K07447	20763	23829	22458	20190	24860	21028	22209	23350	23152	25541	22921	24325	24964	23824	24555	23334	23380	21876	[["Unclassified", "Genetic Information Processing", "Replication, recombination and repair proteins"]]
K07112	21573	22439	23819	19611	24709	19354	20382	25106	23619	20617	21570	22626	22975	19170	21708	21944	22224	20367	[["Unclassified", "Poorly Characterized", "General function prediction only"]]
K07113	6525	7565	7425	6029	6922	5108	6249	7228	6037	7742	7100	7450	7193	6116	8270	7422	7357	5473	[["Unclassified", "Poorly Characterized", "General function prediction only"]]
K07448	3241	3595	3575	2492	3504	2599	2645	3361	3120	3163	2680	3503	3034	2612	3053	3383	3991	2601	[["Unclassified", "Genetic Information Processing", "Replication, recombination and repair proteins"]]
K07118	5284	6221	5770	4153	6773	5142	4647	4695	4140	7732	5898	7542	10472	6705	8997	8686	7588	5366	[["Unclassified", "Poorly Characterized", "General function prediction only"]]
K07119	12232	13779	14249	9498	14956	10868	11411	12781	11913	14450	12868	14978	16304	12573	15503	14984	14034	12271	[["Unclassified", "Poorly Characterized", "General function prediction only"]]
K10619	1383	2111	2130	1476	1900	1221	1990	1980	2289	2204	1975	2572	2293	2109	1755	1844	1741	2494	[["Metabolism", "Xenobiotics Biodegradation and Metabolism", "Xylene degradation"]]
K10618	4	2	1	2	2	0	0	4	10	2	3	1	2	5	3	1	8	4	[["Metabolism", "Xenobiotics Biodegradation and Metabolism", "Xylene degradation"]]
K10617	76	112	244	69	89	60	50	84	80	52	62	150	370	61	48	102	72	276	[["Metabolism", "Xenobiotics Biodegradation and Metabolism", "Xylene degradation"]]
K10616	467	522	475	294	634	540	220	445	372	391	384	420	458	476	655	552	371	407	[["Metabolism", "Xenobiotics Biodegradation and Metabolism", "Xylene degradation"]]
K01848	10048	13868	12038	7925	12311	8872	13291	12947	12746	15163	10741	13586	11301	10192	12465	12775	13577	8034	[["Metabolism", "Carbohydrate Metabolism", "Propanoate metabolism"], ["Metabolism", "Energy Metabolism", "Carbon fixation pathways in prokaryotes"], ["Metabolism", "Amino Acid Metabolism", "Valine, leucine and isoleucine degradation"]]
K01849	8822	12077	10553	6956	10742	7837	11426	11266	11241	12846	9203	11730	9647	9315	11124	10446	11639	7014	[["Metabolism", "Carbohydrate Metabolism", "Propanoate metabolism"], ["Metabolism", "Energy Metabolism", "Carbon fixation pathways in prokaryotes"], ["Metabolism", "Amino Acid Metabolism", "Valine, leucine and isoleucine degradation"]]
K01844	2651	3485	2963	1933	2313	1376	2523	2467	2104	3077	2665	2544	3451	2113	2771	3775	3301	1995	[["Metabolism", "Amino Acid Metabolism", "Lysine degradation"]]
K01845	24205	27739	26836	20812	26994	20821	24223	26494	25454	30624	24927	28384	26360	23496	28008	25696	28796	21389	[["Metabolism", "Amino Acid Metabolism", "Amino acid related enzymes"], ["Metabolism", "Metabolism of Cofactors and Vitamins", "Porphyrin and chlorophyll metabolism"]]
K01846	1419	1530	1580	1159	1623	1144	1636	1796	2081	1560	931	958	1085	788	1166	1295	1179	901	[["Metabolism", "Carbohydrate Metabolism", "C5-Branched dibasic acid metabolism"]]
K01847	15464	16434	16468	13116	15442	14059	14060	15652	14681	17056	15620	16856	17061	15880	17213	16062	15597	14246	[["Metabolism", "Carbohydrate Metabolism", "Propanoate metabolism"], ["Metabolism", "Carbohydrate Metabolism", "Glyoxylate and dicarboxylate metabolism"], ["Metabolism", "Energy Metabolism", "Carbon fixation pathways in prokaryotes"], ["Metabolism", "Amino Acid Metabolism", "Valine, leucine and isoleucine degradation"]]
K01840	32422	36347	34951	30459	37235	32116	31360	34942	33416	38149	33649	37098	38349	33605	35339	36680	38353	32731	[["Metabolism", "Carbohydrate Metabolism", "Amino sugar and nucleotide sugar metabolism"], ["Metabolism", "Carbohydrate Metabolism", "Fructose and mannose metabolism"]]
K01841	1743	1778	2045	1367	1867	1602	1446	2210	1828	1773	1350	1845	1945	1734	1755	1888	1793	1839	[["Metabolism", "Metabolism of Other Amino Acids", "Phosphonate and phosphinate metabolism"]]
K01842	1	0	4	10	8	8	0	1	4	2	6	0	2	4	0	0	8	6	[["Unclassified", "Metabolism", "Others"]]
K01843	6107	6692	7011	5732	6804	5110	6149	7822	7547	6512	5542	5832	6505	4920	6015	6515	6721	5204	[["Metabolism", "Amino Acid Metabolism", "Lysine degradation"]]
K06219	256	238	256	1627	155	168	104	113	150	398	961	176	215	294	165	196	219	496	[["Unclassified", "Metabolism", "Biosynthesis and biodegradation of secondary metabolites"]]
K10832	0	0	0	0	0	0	0	0	0	0	0	0	0	0	0	0	0	0	[["Unclassified", "Metabolism", "Energy metabolism"]]
K05348	112	82	72	36	80	61	89	99	103	20	103	26	32	18	36	50	30	106	[["Unclassified", "Metabolism", "Others"]]
K14203	0	4	0	0	5	0	0	0	0	0	1	1	1	6	0	1	0	0	[["Human Diseases", "Infectious Diseases", "Staphylococcus aureus infection"]]
K08483	10836	11316	11414	12001	12157	9766	8788	11135	10076	12487	12326	11670	12720	11197	12494	11342	12135	11255	[["Environmental Information Processing", "Membrane Transport", "Phosphotransferase system (PTS)"], ["Environmental Information Processing", "Membrane Transport", "Transporters"]]
K08482	7137	9156	8749	6577	10124	7798	11009	10859	11698	10692	8448	9610	7383	8247	8432	7983	9125	6610	[["Unclassified", "Cellular Processes and Signaling", "Signal transduction mechanisms"]]
K08481	970	1077	1117	836	1211	820	1099	1363	1406	1023	713	788	874	683	957	1010	982	1318	[["Unclassified", "Cellular Processes and Signaling", "Signal transduction mechanisms"]]
K08480	16	0	10	0	0	0	12	0	0	52	26	0	2	36	0	26	4	284	[["Unclassified", "Cellular Processes and Signaling", "Signal transduction mechanisms"]]
K08485	96	71	44	1570	57	71	33	34	51	183	835	30	77	225	90	57	76	279	[["Environmental Information Processing", "Membrane Transport", "Phosphotransferase system (PTS)"], ["Environmental Information Processing", "Membrane Transport", "Transporters"]]
K08484	5614	6264	6172	6057	6415	5040	5755	6425	6263	5686	6614	6653	6536	6600	6253	5782	5472	5829	[["Environmental Information Processing", "Membrane Transport", "Phosphotransferase system (PTS)"], ["Environmental Information Processing", "Membrane Transport", "Transporters"]]
K00464	55	52	80	29	35	31	28	32	24	102	85	80	94	98	135	225	48	308	[["Unclassified", "Metabolism", "Biosynthesis and biodegradation of secondary metabolites"]]
K00467	1054	440	413	269	432	264	317	317	292	560	1169	481	513	995	498	541	412	498	[["Metabolism", "Carbohydrate Metabolism", "Pyruvate metabolism"]]
K00466	850	861	934	453	658	570	617	765	563	1213	861	1088	1087	720	899	930	861	675	[["Metabolism", "Amino Acid Metabolism", "Tryptophan metabolism"]]
K00461	0	0	0	0	0	0	0	0	0	0	2	0	0	0	0	1	0	0	[["Metabolism", "Lipid Metabolism", "Arachidonic acid metabolism"], ["Human Diseases", "Infectious Diseases", "Toxoplasmosis"]]
K00460	0	0	0	0	0	0	0	0	0	0	0	0	0	0	0	0	0	0	[["Metabolism", "Lipid Metabolism", "Arachidonic acid metabolism"], ["Metabolism", "Lipid Metabolism", "Linoleic acid metabolism"]]
K00463	0	1	1	0	0	0	0	0	0	0	1	0	0	0	0	0	0	0	[["Metabolism", "Amino Acid Metabolism", "Tryptophan metabolism"], ["Human Diseases", "Infectious Diseases", "African trypanosomiasis"]]
K00462	3272	4784	4851	3276	4500	2953	4180	4391	4918	4961	4403	5626	5396	4661	4133	4209	3832	5700	[["Metabolism", "Xenobiotics Biodegradation and Metabolism", "Dioxin degradation"], ["Metabolism", "Xenobiotics Biodegradation and Metabolism", "Chlorocyclohexane and chlorobenzene degradation"]]
K04509	5	11	9	1	12	3	6	10	4	1	10	28	3	11	5	6	20	9	[["Metabolism", "Carbohydrate Metabolism", "Glyoxylate and dicarboxylate metabolism"]]
K00469	940	883	924	764	1258	1056	990	1145	1057	1747	1187	1365	1168	924	1403	1367	1182	1049	[["Metabolism", "Carbohydrate Metabolism", "Inositol phosphate metabolism"], ["Metabolism", "Carbohydrate Metabolism", "Ascorbate and aldarate metabolism"]]
K00468	175	186	231	78	109	96	70	139	123	216	182	140	141	59	143	247	119	133	[["Metabolism", "Amino Acid Metabolism", "Tyrosine metabolism"]]
K08645	0	0	0	0	0	0	0	0	0	0	0	0	0	0	0	0	0	0	[["Metabolism", "Enzyme Families", "Peptidases"], ["Organismal Systems", "Immune System", "NOD-like receptor signaling pathway"], ["Environmental Information Processing", "Signaling Molecules and Interaction", "Bacterial toxins"]]
K04744	13215	16008	15106	14114	18631	14513	16695	17218	17608	16737	16379	17713	17088	15671	16142	15121	16716	13871	[["Unclassified", "Cellular Processes and Signaling", "Pores ion channels"]]
K01518	17	395	1	393	18	18	81	38	53	12	419	6	24	386	246	37	129	100	[["Metabolism", "Nucleotide Metabolism", "Pyrimidine metabolism"], ["Metabolism", "Nucleotide Metabolism", "Purine metabolism"]]
K01519	0	0	0	0	0	0	0	0	0	0	0	0	0	0	0	0	0	0	[["Metabolism", "Nucleotide Metabolism", "Pyrimidine metabolism"], ["Metabolism", "Xenobiotics Biodegradation and Metabolism", "Drug metabolism - other enzymes"], ["Metabolism", "Nucleotide Metabolism", "Purine metabolism"]]
K04748	3416	3254	3593	2397	3787	2890	3182	3977	3821	3116	3443	3421	3180	2831	3445	3074	3304	3259	[["Metabolism", "Energy Metabolism", "Nitrogen metabolism"]]
K04749	14956	22400	19166	15846	22928	16907	25443	22443	24761	26295	19453	23734	19144	19436	21121	20362	22524	14066	[["Unclassified", "Cellular Processes and Signaling", "Signal transduction mechanisms"]]
K01514	3774	5572	5006	3978	6139	4661	6719	5631	6484	6340	5029	5865	5078	5456	5304	4634	5382	4383	[["Metabolism", "Nucleotide Metabolism", "Purine metabolism"]]
K01515	17149	20364	19500	17079	20756	16337	18673	19207	19569	22755	19919	21665	20335	19075	19978	19900	21226	18547	[["Metabolism", "Nucleotide Metabolism", "Purine metabolism"]]
K01512	13227	16120	15539	14085	18191	13732	16429	16820	17532	18501	15847	17977	16647	15614	15772	15859	17405	14072	[["Metabolism", "Xenobiotics Biodegradation and Metabolism", "Aminobenzoate degradation"], ["Metabolism", "Carbohydrate Metabolism", "Pyruvate metabolism"]]
K01510	0	0	0	0	0	0	0	0	0	0	0	0	0	0	0	0	0	0	[["Environmental Information Processing", "Signaling Molecules and Interaction", "Cellular antigens"], ["Metabolism", "Nucleotide Metabolism", "Pyrimidine metabolism"], ["Metabolism", "Nucleotide Metabolism", "Purine metabolism"]]
K14623	1571	1525	1663	1088	1563	1696	1275	1997	1681	1460	925	1130	1453	1176	1114	1608	1649	1525	[["Unclassified", "Poorly Characterized", "General function prediction only"]]
K14626	70	38	30	32	34	26	9	12	17	84	82	105	76	58	109	217	95	25	[["None"]]
K14627	40	22	20	8	24	20	11	16	0	10	18	34	16	8	20	52	17	4	[["None"]]
K14628	29	41	20	37	27	26	8	29	81	17	40	29	96	29	29	38	36	6	[["None"]]
K14629	12	23	8	13	13	13	5	5	9	13	24	30	47	26	44	152	12	14	[["None"]]
K03918	460	555	430	393	568	398	313	346	482	562	747	809	752	780	939	902	670	530	[["Metabolism", "Amino Acid Metabolism", "Lysine biosynthesis"], ["Metabolism", "Amino Acid Metabolism", "Amino acid related enzymes"]]
K03919	6328	8541	7970	8094	10187	7827	9973	9265	9894	9491	8618	9388	9116	8788	9510	8287	8555	6285	[["Genetic Information Processing", "Replication and Repair", "DNA repair and recombination proteins"]]
K12372	866	1211	1026	2496	1098	769	636	786	817	738	2112	712	1343	1488	1212	874	756	1294	[["Environmental Information Processing", "Membrane Transport", "ABC transporters"], ["Environmental Information Processing", "Membrane Transport", "Transporters"]]
K12373	18765	21876	20100	21803	24096	24388	24112	21826	23630	27031	22825	23640	23003	23430	21130	23477	22783	19806	[["Metabolism", "Glycan Biosynthesis and Metabolism", "Other glycan degradation"], ["Metabolism", "Glycan Biosynthesis and Metabolism", "Glycosphingolipid biosynthesis - globo series"], ["Metabolism", "Glycan Biosynthesis and Metabolism", "Glycosaminoglycan degradation"], ["Metabolism", "Carbohydrate Metabolism", "Amino sugar and nucleotide sugar metabolism"], ["Cellular Processes", "Transport an…
K12370	866	1210	1026	2495	1098	768	633	786	816	737	2112	711	1343	1487	1212	874	756	1294	[["Environmental Information Processing", "Membrane Transport", "ABC transporters"], ["Environmental Information Processing", "Membrane Transport", "Transporters"]]
K12371	863	871	1091	2130	1128	771	574	776	808	741	1747	772	1382	1178	1069	914	653	1231	[["Environmental Information Processing", "Membrane Transport", "ABC transporters"], ["Environmental Information Processing", "Membrane Transport", "Transporters"]]
K02359	0	0	0	0	0	0	0	0	0	0	0	0	0	0	0	0	0	0	[["None"]]
K02358	33834	38941	37548	32741	43068	35709	38263	41028	40839	41838	36828	41159	39268	36364	38722	37912	40590	33681	[["Organismal Systems", "Environmental Adaptation", "Plant-pathogen interaction"], ["Genetic Information Processing", "Translation", "Translation factors"]]
K02351	3520	3866	3469	2678	4249	3097	2721	2731	2383	3437	3456	4079	6186	3723	4383	4976	4234	3247	[["Unclassified", "Poorly Characterized", "Function unknown"]]
K02352	26	38	10	7	29	7	8	19	18	3	19	31	6	82	16	63	16	12	[["Metabolism", "Biosynthesis of Other Secondary Metabolites", "beta-Lactam resistance"]]
K02355	38474	44874	42807	37570	46602	39819	41741	44320	43931	48839	41675	46314	45977	41968	44215	43855	46969	38841	[["Genetic Information Processing", "Translation", "Translation factors"]]
K02357	22003	25095	23648	21607	26032	22185	23193	24659	24398	26800	24152	25752	25631	24181	24967	24411	25521	22716	[["Genetic Information Processing", "Translation", "Translation factors"]]
K02356	26551	31688	29374	28392	34957	28928	31450	31755	32355	35528	31521	33944	33962	31470	32391	31326	33068	28109	[["Genetic Information Processing", "Translation", "Translation factors"]]
K13574	1268	1317	1419	1074	1258	1231	1319	1411	1174	1757	1320	1607	1401	1678	1651	1365	1491	1197	[["Unclassified", "Metabolism", "Energy metabolism"]]
K13573	2453	3162	2766	1700	2456	1510	2208	2386	2285	3042	2590	2752	2933	2185	2989	3697	2947	1905	[["Unclassified", "Genetic Information Processing", "Protein folding and associated processing"]]
K13572	4513	5498	4940	2864	4000	2726	3710	3865	3435	6157	4252	5313	5190	4204	5932	5486	5428	3486	[["Unclassified", "Genetic Information Processing", "Protein folding and associated processing"]]
K13571	4762	5560	5023	2957	4061	3104	3769	3811	3138	6463	4415	5769	5295	4317	5653	5579	6606	3845	[["Genetic Information Processing", "Folding, Sorting and Degradation", "Proteasome"]]
K13570	4087	4951	4399	2440	3329	2338	3209	3167	2558	5785	3879	4872	4835	4050	5413	5013	5117	3269	[["Genetic Information Processing", "Folding, Sorting and Degradation", "Ubiquitin system"]]
K12112	44	92	31	90	45	28	44	54	36	121	43	2	33	164	40	21	80	130	[["Metabolism", "Glycan Biosynthesis and Metabolism", "Other glycan degradation"], ["Metabolism", "Carbohydrate Metabolism", "Galactose metabolism"]]
K12113	1	18	5	69	5	0	8	1	10	102	33	1	7	81	14	0	21	77	[["Genetic Information Processing", "Transcription", "Transcription factors"]]
K12110	0	0	0	0	0	0	0	0	0	0	0	0	0	0	0	0	0	0	[["Environmental Information Processing", "Membrane Transport", "Secretion system"]]
K12111	49	94	40	104	51	31	45	68	45	122	54	18	35	165	42	24	86	148	[["Metabolism", "Glycan Biosynthesis and Metabolism", "Other glycan degradation"], ["Metabolism", "Carbohydrate Metabolism", "Galactose metabolism"]]
K07329	0	0	0	0	0	0	0	0	0	0	0	0	0	0	0	0	0	0	[["Environmental Information Processing", "Membrane Transport", "Secretion system"], ["Cellular Processes", "Cell Motility", "Bacterial motility proteins"]]
K07328	0	0	0	0	0	0	0	0	0	0	0	0	0	0	0	0	0	0	[["Environmental Information Processing", "Membrane Transport", "Secretion system"], ["Cellular Processes", "Cell Motility", "Bacterial motility proteins"]]
K07323	8427	8835	9650	8172	10938	8613	7777	9867	9747	8696	8442	9816	10781	7387	8383	8596	10686	9882	[["Unclassified", "Metabolism", "Biosynthesis and biodegradation of secondary metabolites"]]
K07322	4114	4218	3958	4724	4356	6035	4382	4138	4680	4387	4047	3748	3769	4215	4048	3951	4180	3957	[["Unclassified", "Cellular Processes and Signaling", "Cell division"]]
K07321	1825	1861	1715	1448	1975	1592	1283	1738	1703	2117	1751	2311	1201	1755	1099	1945	2785	1389	[["Unclassified", "Cellular Processes and Signaling", "Cell division"]]
K07320	4191	4041	4489	4613	5681	4407	3668	4432	4168	4275	5052	4713	6663	4299	5321	4687	4950	4914	[["Unclassified", "Genetic Information Processing", "Translation proteins"]]
K07327	0	0	0	0	0	0	0	0	0	0	0	0	0	0	0	0	0	0	[["Environmental Information Processing", "Membrane Transport", "Secretion system"], ["Cellular Processes", "Cell Motility", "Bacterial motility proteins"]]
K07326	123	166	125	67	154	77	17	109	119	88	116	148	154	147	114	111	73	313	[["Human Diseases", "Infectious Diseases", "Pertussis"]]
K07325	0	0	0	0	0	0	0	0	0	0	0	0	0	0	0	0	0	0	[["Environmental Information Processing", "Membrane Transport", "Secretion system"], ["Cellular Processes", "Cell Motility", "Bacterial motility proteins"]]
K07324	0	0	0	0	0	0	0	0	0	0	0	0	0	0	0	0	0	0	[["Environmental Information Processing", "Membrane Transport", "Secretion system"], ["Cellular Processes", "Cell Motility", "Bacterial motility proteins"]]
K08163	80	46	36	1501	52	65	23	19	39	129	813	28	53	188	77	40	75	159	[["Environmental Information Processing", "Membrane Transport", "Transporters"]]
K06180	30225	32471	31309	30542	34137	31531	29714	33176	33327	34349	30918	31183	31487	31919	30894	31226	32203	30901	[["Genetic Information Processing", "Translation", "Ribosome Biogenesis"]]
K06181	5960	5297	5708	5333	7082	5312	4468	6052	5458	5021	5975	5140	7203	5234	5751	5708	5800	6503	[["Genetic Information Processing", "Translation", "Ribosome Biogenesis"]]
K06182	5518	5344	5761	6767	8615	6244	4556	5407	5156	5689	7264	6460	9980	6288	7267	6927	6803	7132	[["Genetic Information Processing", "Translation", "Ribosome Biogenesis"]]
K06183	5622	5436	5698	7230	7320	6202	4702	5789	5586	5958	6776	5740	7762	6248	6651	6495	6371	7336	[["Genetic Information Processing", "Translation", "Ribosome Biogenesis"]]
K06186	3701	3520	3905	4157	5105	3920	3045	3843	3658	3502	4415	3986	5604	3545	4322	4022	4283	4405	[["Unclassified", "Genetic Information Processing", "Translation proteins"]]
K06187	21999	25082	23620	21562	25989	22133	23172	24656	24401	26775	24104	25621	25476	24193	24956	24365	25486	22647	[["Genetic Information Processing", "Replication and Repair", "Homologous recombination"], ["Genetic Information Processing", "Replication and Repair", "DNA repair and recombination proteins"]]
K06188	4122	5259	5006	4015	5358	4103	4891	4789	4998	5491	5170	5522	6513	5481	6485	5207	5543	4994	[["Environmental Information Processing", "Signaling Molecules and Interaction", "Ion channels"]]
K06189	3893	3707	4046	4340	5341	4048	3269	3985	3821	3627	4621	4156	6197	3729	4639	4240	4405	4564	[["Unclassified", "Cellular Processes and Signaling", "Other transporters"]]
K08359	132	55	56	1423	67	67	20	26	45	178	792	34	62	198	89	40	74	152	[["Environmental Information Processing", "Signal Transduction", "Two-component system"]]
K07589	45	62	92	189	51	125	31	28	63	185	102	16	32	112	15	25	74	244	[["Unclassified", "Metabolism", "Metabolism of cofactors and vitamins"]]
K07588	15444	18712	17708	12918	17323	14334	17351	17918	17414	19726	16058	18624	16327	15155	17455	17282	19007	12858	[["Unclassified", "Metabolism", "Amino acid metabolism"]]
K07587	0	0	0	0	0	0	0	0	0	0	0	0	0	0	0	0	0	0	[["Genetic Information Processing", "Translation", "Aminoacyl-tRNA biosynthesis"], ["Metabolism", "Amino Acid Metabolism", "Amino acid related enzymes"]]
K07586	1280	1850	1328	1155	1137	718	1118	1011	745	1370	1310	1328	1788	1271	1548	2058	1517	1274	[["Unclassified", "Genetic Information Processing", "Others"]]
K07585	0	0	0	0	0	0	0	0	0	0	0	0	0	0	0	0	0	0	[["Unclassified", "Genetic Information Processing", "Others"]]
K07584	490	403	333	1919	512	791	321	267	357	864	1316	393	643	1240	659	736	537	1190	[["Unclassified", "Genetic Information Processing", "Others"]]
K07583	0	0	0	0	0	0	0	0	0	0	0	0	0	0	0	0	0	0	[["Unclassified", "Genetic Information Processing", "Others"]]
K07582	0	0	0	0	0	0	0	0	0	0	0	0	0	0	0	0	0	0	[["Unclassified", "Genetic Information Processing", "Others"]]
K07581	0	0	0	0	0	0	0	0	0	0	0	0	0	0	0	0	0	0	[["Unclassified", "Genetic Information Processing", "Others"]]
K07580	0	0	0	0	0	0	0	0	0	0	0	0	0	0	0	0	0	0	[["Unclassified", "Genetic Information Processing", "Others"]]
K11139	0	0	0	25	0	0	0	0	0	1	6	0	0	1	0	0	0	0	[["Environmental Information Processing", "Signaling Molecules and Interaction", "Bacterial toxins"]]
K05989	4639	4634	4327	5455	4096	4605	3129	3642	3379	4847	5030	4225	4246	4730	4439	5973	4323	5209	[["Unclassified", "Metabolism", "Others"]]
K05988	0	0	0	0	0	0	0	0	0	0	0	0	0	0	0	0	0	0	[["Unclassified", "Metabolism", "Others"]]
K05985	394	300	221	700	249	433	238	158	167	444	514	246	538	664	402	423	369	802	[["Unclassified", "Genetic Information Processing", "Replication, recombination and repair proteins"]]
K05987	1	17	3	32	5	0	8	1	9	101	18	1	7	80	14	0	21	66	[["Unclassified", "Metabolism", "Others"]]
K05986	1044	1185	1182	1262	2624	1774	1046	1063	965	1436	1539	1907	3633	1842	2112	1976	1936	1482	[["Unclassified", "Metabolism", "Others"]]
K10843	3511	4375	3991	2292	3250	2521	2598	3355	2751	3911	3325	3852	4160	3237	4020	4837	4098	3291	[["Genetic Information Processing", "Replication and Repair", "Nucleotide excision repair"], ["Genetic Information Processing", "Transcription", "Transcription machinery"], ["Genetic Information Processing", "Transcription", "Basal transcription factors"], ["Genetic Information Processing", "Replication and Repair", "DNA repair and recombination proteins"]]
K08354	862	698	799	1961	851	872	578	738	687	738	1311	962	570	409	271	648	1621	791	[["Unclassified", "Cellular Processes and Signaling", "Electron transfer carriers"]]
K10844	116	106	164	76	57	49	31	73	73	68	165	54	107	91	90	140	141	159	[["Genetic Information Processing", "Replication and Repair", "Nucleotide excision repair"], ["Genetic Information Processing", "Transcription", "Transcription machinery"], ["Genetic Information Processing", "Transcription", "Basal transcription factors"], ["Genetic Information Processing", "Replication and Repair", "DNA repair and recombination proteins"]]
K10848	180	164	188	64	98	137	67	136	130	106	163	128	79	29	88	199	182	68	[["Genetic Information Processing", "Replication and Repair", "Nucleotide excision repair"], ["Genetic Information Processing", "Replication and Repair", "DNA repair and recombination proteins"], ["Genetic Information Processing", "Replication and Repair", "DNA replication proteins"]]
K00673	4097	4401	4675	3052	4273	3063	3592	4363	4804	3891	3837	4233	3950	3781	3382	3331	3474	4766	[["Metabolism", "Amino Acid Metabolism", "Arginine and proline metabolism"]]
K00674	18391	21969	20473	17168	22764	18136	20608	21166	21214	23205	20719	22725	22734	20771	22694	21127	21356	18876	[["Metabolism", "Amino Acid Metabolism", "Lysine biosynthesis"]]
K00675	2611	2267	2274	1443	1980	1511	1567	1780	1503	2652	2480	2171	2172	2256	2182	2736	2109	1780	[["Unclassified", "Metabolism", "Biosynthesis and biodegradation of secondary metabolites"]]
K00676	1732	1773	1714	1998	1311	1366	1123	1340	1197	1914	2038	1811	2041	2084	1993	1817	1750	2396	[["Unclassified", "Genetic Information Processing", "Translation proteins"]]
K00677	15052	16670	16085	15980	19257	17837	17305	18377	18307	18003	16354	17441	17519	16801	16776	16424	17913	15136	[["Metabolism", "Glycan Biosynthesis and Metabolism", "Lipopolysaccharide biosynthesis proteins"], ["Metabolism", "Glycan Biosynthesis and Metabolism", "Lipopolysaccharide biosynthesis"]]
K06988	14506	18701	17128	11713	18654	13059	16796	16274	15971	21999	16244	20545	21111	16672	21124	19833	19869	14012	[["Unclassified", "Poorly Characterized", "General function prediction only"]]
K06989	799	820	907	781	714	841	712	832	697	837	869	969	810	893	845	876	784	714	[["Metabolism", "Metabolism of Cofactors and Vitamins", "Nicotinate and nicotinamide metabolism"]]
K08351	126	183	145	242	121	94	104	124	140	277	202	143	114	162	111	202	149	340	[["Unclassified", "Cellular Processes and Signaling", "Electron transfer carriers"]]
K06980	16755	20126	19256	15162	21530	16177	19482	19874	19884	21871	19093	21607	21589	19184	21608	19731	19929	16980	[["Unclassified", "Poorly Characterized", "General function prediction only"]]
K06981	0	0	0	1	0	0	0	0	0	1	1	2	0	0	0	0	1	4	[["Unclassified", "Poorly Characterized", "General function prediction only"]]
K06982	4	2	0	2	16	29	12	1	10	0	0	0	8	0	0	0	2	0	[["Metabolism", "Metabolism of Cofactors and Vitamins", "Pantothenate and CoA biosynthesis"]]
K08350	119	72	59	1568	63	89	28	56	67	185	876	61	86	233	96	89	97	221	[["Metabolism", "Carbohydrate Metabolism", "Glyoxylate and dicarboxylate metabolism"], ["Metabolism", "Energy Metabolism", "Methane metabolism"], ["Environmental Information Processing", "Signal Transduction", "Two-component system"]]
K06984	0	0	0	0	0	0	0	0	0	0	0	0	0	0	0	0	0	0	[["Unclassified", "Poorly Characterized", "General function prediction only"]]
K06985	6858	6509	7068	4629	7147	5873	5828	6964	6411	5576	6376	6176	6686	6614	7175	6455	5954	6080	[["Cellular Processes", "Cell Growth and Death", "Cell cycle - Caulobacter"]]
K06986	4233	4573	4990	3185	4661	3785	3647	5152	4886	4391	4202	4604	4895	4368	3880	4687	4203	5452	[["Unclassified", "Poorly Characterized", "General function prediction only"]]
K06987	4215	4356	5002	3613	4533	3678	3858	4775	4708	4251	4045	4260	4050	4300	4023	3873	3882	4314	[["Unclassified", "Poorly Characterized", "General function prediction only"]]
K02445	492	499	476	2312	488	523	328	424	438	464	1197	313	544	889	425	490	488	840	[["Environmental Information Processing", "Membrane Transport", "Transporters"]]
K02444	3049	3509	3936	4642	3984	3319	3208	3661	3289	3157	4383	3801	3788	4331	4359	3880	3164	3754	[["Genetic Information Processing", "Transcription", "Transcription factors"]]
K00582	0	0	0	0	0	0	0	0	0	0	0	0	0	0	0	0	0	0	[["Metabolism", "Energy Metabolism", "Methane metabolism"]]
K00583	0	0	0	0	0	0	0	0	0	0	0	0	0	0	0	0	0	0	[["Metabolism", "Energy Metabolism", "Methane metabolism"]]
K00580	0	0	0	0	0	0	0	0	0	0	0	0	0	0	0	0	0	0	[["Metabolism", "Energy Metabolism", "Methane metabolism"]]
K02110	21452	24442	22937	20968	25631	21714	22664	23627	23641	26327	23951	25527	25033	24109	24826	24162	24948	22006	[["Metabolism", "Energy Metabolism", "Photosynthesis proteins"], ["Metabolism", "Energy Metabolism", "Oxidative phosphorylation"], ["Metabolism", "Energy Metabolism", "Photosynthesis"]]
K00586	0	0	0	0	0	0	0	0	0	0	0	0	0	0	0	0	0	0	[["Unclassified", "Genetic Information Processing", "Translation proteins"]]
K00587	1528	2179	1939	1728	2661	2057	2668	2378	2790	1999	2002	2185	1821	1806	2022	1895	2150	1348	[["Unclassified", "Genetic Information Processing", "Protein folding and associated processing"]]
K00584	4	3	4	1	0	7	2	0	2	1	1	4	1	1	4	2	2	0	[["Metabolism", "Energy Metabolism", "Methane metabolism"]]
K08921	0	0	0	0	0	0	0	0	0	0	0	0	0	0	0	0	0	0	[["Metabolism", "Energy Metabolism", "Photosynthesis proteins"]]
K02441	191	170	162	1621	135	160	60	76	136	225	925	81	108	285	98	176	151	424	[["Unclassified", "Poorly Characterized", "General function prediction only"]]
K00588	4467	5333	5069	2762	3845	2864	3838	4064	3287	5909	3979	5364	4543	3672	5131	5325	5431	3578	[["Metabolism", "Biosynthesis of Other Secondary Metabolites", "Phenylpropanoid biosynthesis"], ["Metabolism", "Biosynthesis of Other Secondary Metabolites", "Stilbenoid, diarylheptanoid and gingerol biosynthesis"], ["Metabolism", "Biosynthesis of Other Secondary Metabolites", "Flavonoid biosynthesis"], ["Metabolism", "Amino Acid Metabolism", "Phenylalanine metabolism"]]
K08922	0	0	0	0	0	0	0	0	0	0	0	0	0	0	0	0	0	0	[["Metabolism", "Energy Metabolism", "Photosynthesis proteins"]]
K02440	9801	12464	11309	9759	11862	9058	12402	11589	12055	15045	11996	13380	11576	12003	12267	11714	12356	10517	[["Environmental Information Processing", "Signaling Molecules and Interaction", "Ion channels"]]
K00018	3449	2855	3176	4501	2764	4356	2895	3158	2946	3590	3555	2598	2697	3651	3171	3140	3163	4018	[["Metabolism", "Carbohydrate Metabolism", "Glyoxylate and dicarboxylate metabolism"], ["Metabolism", "Amino Acid Metabolism", "Glycine, serine and threonine metabolism"], ["Metabolism", "Energy Metabolism", "Methane metabolism"]]
K08923	0	0	0	0	0	0	0	0	0	0	0	0	0	0	0	0	0	0	[["Metabolism", "Energy Metabolism", "Photosynthesis proteins"]]
K02443	247	162	178	913	144	448	123	140	227	407	508	128	318	632	389	269	211	600	[["Genetic Information Processing", "Transcription", "Transcription factors"]]
K00019	10849	12230	12318	8927	12770	9459	10377	10982	10061	13021	12109	13710	15279	12079	13595	13154	12532	11043	[["Metabolism", "Lipid Metabolism", "Synthesis and degradation of ketone bodies"], ["Metabolism", "Carbohydrate Metabolism", "Butanoate metabolism"]]
K02442	85	27	66	45	39	49	3	7	11	74	45	17	16	23	26	13	15	185	[["Unclassified", "Poorly Characterized", "General function prediction only"]]
K08925	0	0	0	0	0	0	0	0	0	0	0	0	0	0	0	0	0	0	[["Metabolism", "Energy Metabolism", "Photosynthesis proteins"]]
K08926	111	163	232	111	103	74	131	128	107	93	158	119	108	132	92	75	107	104	[["Metabolism", "Energy Metabolism", "Photosynthesis proteins"]]
K08927	111	163	232	111	103	74	131	128	107	93	158	119	108	132	92	75	107	104	[["Metabolism", "Energy Metabolism", "Photosynthesis proteins"]]
K03149	18754	21825	21249	17346	23642	18065	21029	22459	22278	23877	20841	23372	21535	20145	21771	21551	22934	18958	[["Metabolism", "Metabolism of Cofactors and Vitamins", "Thiamine metabolism"]]
K06604	0	0	0	0	0	0	0	0	0	0	0	0	0	0	0	0	0	16	[["Cellular Processes", "Cell Motility", "Flagellar assembly"]]
K00015	8957	9907	9898	6630	9421	7398	8970	9861	8940	10535	9026	11193	10154	9697	10817	9003	9505	8007	[["Metabolism", "Carbohydrate Metabolism", "Glyoxylate and dicarboxylate metabolism"]]
K01989	6106	6166	6950	7015	6813	5958	5941	6457	5771	7081	7238	7344	7034	7357	7420	7292	8305	6289	[["Environmental Information Processing", "Membrane Transport", "Transporters"]]
K00854	18628	21898	20703	19152	22601	17417	20285	20567	20053	25210	22026	22260	23676	21817	23640	23537	22291	17941	[["Metabolism", "Carbohydrate Metabolism", "Pentose and glucuronate interconversions"]]
K00855	3509	3248	3797	3711	3374	2762	3100	3803	3564	3236	3890	3190	3415	2720	3023	3203	3392	3555	[["Metabolism", "Energy Metabolism", "Carbon fixation in photosynthetic organisms"]]
K00856	5249	5802	5791	3807	6648	4796	4534	5250	4653	5889	5797	6276	8002	5125	6533	7225	6612	5335	[["Metabolism", "Nucleotide Metabolism", "Purine metabolism"]]
K00857	8642	9409	8895	8475	9640	7738	7330	7839	7733	9865	9841	9901	11840	10105	9606	10412	9265	9737	[["Metabolism", "Nucleotide Metabolism", "Pyrimidine metabolism"], ["Metabolism", "Xenobiotics Biodegradation and Metabolism", "Drug metabolism - other enzymes"]]
K00850	20153	22123	21455	22775	23305	21526	20638	21874	21625	26158	23500	22837	22763	21967	21309	22748	24054	21585	[["Metabolism", "Carbohydrate Metabolism", "Pentose phosphate pathway"], ["Metabolism", "Carbohydrate Metabolism", "Glycolysis / Gluconeogenesis"], ["Metabolism", "Carbohydrate Metabolism", "Fructose and mannose metabolism"], ["Metabolism", "Energy Metabolism", "Methane metabolism"], ["Metabolism", "Carbohydrate Metabolism", "Galactose metabolism"]]
K00851	12820	16083	15143	12325	16641	12370	15786	15546	15919	17464	15660	16974	16318	15087	15241	16162	15537	13503	[["Metabolism", "Carbohydrate Metabolism", "Pentose phosphate pathway"]]
K00852	14804	18139	16647	17885	19176	15597	17386	16759	16230	21633	19936	19814	20422	19308	21120	19704	18877	15488	[["Metabolism", "Carbohydrate Metabolism", "Pentose phosphate pathway"]]
K00853	4756	7165	6121	5102	7657	5823	8648	7497	8156	8764	6514	7539	6824	6508	6748	7135	7446	4879	[["Metabolism", "Carbohydrate Metabolism", "Pentose and glucuronate interconversions"]]
K00858	22728	26065	24482	22022	26545	22646	23831	25251	24946	27666	24969	26493	26581	24577	25589	25747	26284	23373	[["Metabolism", "Metabolism of Cofactors and Vitamins", "Nicotinate and nicotinamide metabolism"]]
K00859	21944	25067	23632	21422	26012	22155	23125	24603	24375	26770	24029	25722	25598	24135	24934	24380	25508	22715	[["Metabolism", "Metabolism of Cofactors and Vitamins", "Pantothenate and CoA biosynthesis"]]
K01181	12758	15884	14463	11262	17107	13017	16367	15312	16076	17008	14189	16631	16786	13887	15477	18078	16296	11613	[["Unclassified", "Metabolism", "Carbohydrate metabolism"]]
K01180	2	0	1	0	1	1	3	0	0	1	1	1	2	0	2	1	2	1	[["Unclassified", "Metabolism", "Others"]]
K01183	11823	16208	14531	12388	16233	12480	16987	15836	16384	20705	15018	17753	15057	14334	16467	17533	16701	11918	[["Metabolism", "Carbohydrate Metabolism", "Amino sugar and nucleotide sugar metabolism"]]
K01182	2562	3387	2703	3827	4066	3365	4249	3539	4139	4960	4315	3681	3059	5292	3497	3770	3829	3333	[["Metabolism", "Carbohydrate Metabolism", "Starch and sucrose metabolism"]]
K01185	4403	3090	3386	7690	3127	5392	2817	2939	2672	3726	6197	3215	3411	5669	3930	3728	3311	4061	[["Unclassified", "Metabolism", "Others"]]
K01184	3775	5550	4991	4924	7954	6246	7518	6210	7177	7961	6273	7649	7152	6800	6910	6607	6730	4520	[["Metabolism", "Carbohydrate Metabolism", "Starch and sucrose metabolism"], ["Metabolism", "Carbohydrate Metabolism", "Pentose and glucuronate interconversions"]]
K01187	30747	39942	35993	31548	41927	36057	41675	38293	40442	48119	37553	43629	40282	39983	41655	40485	40722	32650	[["Metabolism", "Carbohydrate Metabolism", "Starch and sucrose metabolism"], ["Metabolism", "Carbohydrate Metabolism", "Galactose metabolism"]]
K01188	14372	17718	16131	14755	20868	16628	20335	18540	20378	21945	18529	19660	17926	19204	17483	17379	18050	15240	[["Metabolism", "Metabolism of Other Amino Acids", "Cyanoamino acid metabolism"], ["Metabolism", "Carbohydrate Metabolism", "Starch and sucrose metabolism"], ["Metabolism", "Biosynthesis of Other Secondary Metabolites", "Phenylpropanoid biosynthesis"]]
K02596	2444	2563	2926	2340	2448	2153	2318	2589	2280	2717	2631	3100	2131	2291	2303	2550	3446	2048	[["Metabolism", "Energy Metabolism", "Nitrogen metabolism"]]
K13766	6414	6351	6828	4427	7928	6025	5849	7183	6556	5852	5900	6957	7939	5477	6415	6761	6927	6017	[["Metabolism", "Amino Acid Metabolism", "Valine, leucine and isoleucine degradation"]]
K13767	55	30	37	7	5	13	51	2	21	140	7	25	137	95	48	35	20	46	[["Metabolism", "Lipid Metabolism", "Fatty acid metabolism"]]
K13003	0	0	0	0	0	0	0	0	0	0	0	0	0	0	0	0	0	0	[["Metabolism", "Glycan Biosynthesis and Metabolism", "Glycosyltransferases"], ["Metabolism", "Glycan Biosynthesis and Metabolism", "Lipopolysaccharide biosynthesis proteins"]]
K13002	4	16	10	23	0	97	17	9	39	14	4	13	17	34	9	20	43	16	[["Metabolism", "Glycan Biosynthesis and Metabolism", "Glycosyltransferases"], ["Metabolism", "Glycan Biosynthesis and Metabolism", "Lipopolysaccharide biosynthesis proteins"]]
K13000	0	0	0	0	0	0	0	0	0	0	0	0	0	0	0	0	0	0	[["Metabolism", "Glycan Biosynthesis and Metabolism", "Glycosyltransferases"], ["Metabolism", "Glycan Biosynthesis and Metabolism", "Lipopolysaccharide biosynthesis proteins"]]
K02984	0	0	0	0	0	0	0	0	0	0	0	0	0	0	0	0	0	0	[["Genetic Information Processing", "Translation", "Ribosome"]]
K02986	23063	26409	24692	22553	27356	23263	24425	25747	25464	28895	25634	27379	27389	25249	26609	26493	27253	23729	[["Genetic Information Processing", "Translation", "Ribosome"]]
K02987	0	0	0	0	0	0	0	0	0	0	0	0	0	0	0	0	0	0	[["Genetic Information Processing", "Translation", "Ribosome"]]
K02636	1241	1311	1271	785	1337	1191	1362	1532	1464	1132	984	1449	763	499	407	1204	2066	1506	[["Metabolism", "Energy Metabolism", "Photosynthesis proteins"], ["Metabolism", "Energy Metabolism", "Photosynthesis"]]
K02982	22002	25063	23593	21261	26019	22089	23172	24622	24384	26776	24092	25746	25629	24140	24938	24377	25507	22549	[["Genetic Information Processing", "Translation", "Ribosome"]]
K02983	0	0	0	0	0	0	0	0	0	0	0	0	0	0	0	0	0	0	[["Genetic Information Processing", "Folding, Sorting and Degradation", "Ubiquitin system"], ["Genetic Information Processing", "Translation", "Ribosome"]]
K02638	16	1	10	0	1	2	12	2	0	52	28	2	16	36	0	28	5	285	[["Metabolism", "Energy Metabolism", "Photosynthesis proteins"], ["Metabolism", "Energy Metabolism", "Photosynthesis"]]
K02639	106	40	74	30	5	2	84	17	20	312	151	26	22	216	36	137	42	1427	[["Metabolism", "Energy Metabolism", "Photosynthesis proteins"], ["Metabolism", "Energy Metabolism", "Photosynthesis"]]
K02988	21991	25095	23659	21544	26041	22108	23153	24659	24398	26704	24087	25752	25545	24197	25022	24366	25513	22717	[["Genetic Information Processing", "Translation", "Ribosome"]]
K08298	24	18	15	87	31	36	0	15	6	1	33	0	0	34	0	0	1	35	[["Unclassified", "Metabolism", "Others"]]
K08299	784	853	902	630	857	647	840	784	687	941	881	981	966	1048	1058	874	916	937	[["Unclassified", "Metabolism", "Others"]]
K03583	5423	5927	6012	6114	6954	5289	4605	6027	5198	6739	6212	6478	7911	5195	7227	6008	6835	5686	[["Genetic Information Processing", "Replication and Repair", "Homologous recombination"], ["Genetic Information Processing", "Replication and Repair", "DNA repair and recombination proteins"]]
K03582	3985	4344	4556	5358	5781	4447	3388	4890	4386	4208	4980	4533	6217	3998	4757	4688	4950	4685	[["Genetic Information Processing", "Replication and Repair", "Homologous recombination"], ["Genetic Information Processing", "Replication and Repair", "DNA repair and recombination proteins"]]
K03581	11176	11961	12241	11755	12713	10430	9614	12553	11296	13150	11811	12434	13797	10908	12916	12632	13262	11589	[["Genetic Information Processing", "Replication and Repair", "Homologous recombination"], ["Genetic Information Processing", "Replication and Repair", "DNA repair and recombination proteins"]]
K03580	1376	1595	1568	2543	1775	1418	1087	1861	1632	1487	1726	1267	2347	1294	1714	1694	1672	1926	[["Genetic Information Processing", "Transcription", "Transcription machinery"]]
K03587	21405	24660	23351	19951	25442	21298	22709	24276	23991	26057	22935	25346	25007	23026	24496	23588	24954	21434	[["Genetic Information Processing", "Replication and Repair", "Chromosome"], ["Metabolism", "Glycan Biosynthesis and Metabolism", "Peptidoglycan biosynthesis"]]
K03586	3676	3507	3905	4160	5097	3702	3047	3836	3647	3502	4428	3977	5582	3513	4302	4015	4284	4376	[["Genetic Information Processing", "Replication and Repair", "Chromosome"]]
K03585	22470	23513	23936	23181	28115	25595	23617	25208	25110	25300	25233	26312	26807	24236	23623	24153	26204	23546	[["Genetic Information Processing", "Replication and Repair", "Chromosome"]]
K03584	21513	24234	23328	20925	25625	21837	22840	24207	23951	26411	23434	25320	25155	23543	24580	24028	25133	22198	[["Genetic Information Processing", "Replication and Repair", "Homologous recombination"], ["Genetic Information Processing", "Replication and Repair", "DNA repair and recombination proteins"]]
K03589	21071	23832	22920	20357	25247	21261	22556	24029	23671	25715	22843	24825	24855	22745	24037	23227	24673	21657	[["Genetic Information Processing", "Replication and Repair", "Chromosome"], ["Cellular Processes", "Cell Growth and Death", "Cell cycle - Caulobacter"]]
K03588	22172	25230	23776	22784	26321	22511	23341	24775	24643	27080	25166	25919	26094	25111	25384	24831	25850	23314	[["Genetic Information Processing", "Replication and Repair", "Chromosome"], ["Cellular Processes", "Cell Growth and Death", "Cell cycle - Caulobacter"]]
K01725	1920	2064	2435	1444	2186	1792	1594	2013	1876	1897	2294	1978	1826	1961	2478	2214	1928	2105	[["Metabolism", "Energy Metabolism", "Nitrogen metabolism"]]
K01724	17755	21379	20511	14423	22512	16610	20557	21057	20987	23277	19327	23001	22253	19235	21902	21463	21477	17893	[["Unclassified", "Metabolism", "Metabolism of cofactors and vitamins"]]
K01727	858	1087	855	618	824	497	702	653	635	1166	882	1069	1178	691	996	1550	1205	617	[["Unclassified", "Metabolism", "Others"]]
K01726	1928	2298	2116	2754	1830	1598	1863	1809	1680	2602	3093	2291	2071	2658	2605	2169	2239	2111	[["Metabolism", "Metabolism of Terpenoids and Polyketides", "Limonene and pinene degradation"], ["Metabolism", "Xenobiotics Biodegradation and Metabolism", "Bisphenol degradation"], ["Metabolism", "Carbohydrate Metabolism", "Butanoate metabolism"], ["Metabolism", "Xenobiotics Biodegradation and Metabolism", "Naphthalene degradation"], ["Metabolism", "Xenobiotics Biodegradation and Metabolism", "B…
K01721	5030	6011	6022	4242	5721	4545	5518	5706	4709	7097	5797	7042	6140	6224	7465	6400	6355	4386	[["Metabolism", "Metabolism of Other Amino Acids", "Cyanoamino acid metabolism"], ["Metabolism", "Xenobiotics Biodegradation and Metabolism", "Aminobenzoate degradation"], ["Metabolism", "Amino Acid Metabolism", "Tryptophan metabolism"], ["Metabolism", "Xenobiotics Biodegradation and Metabolism", "Styrene degradation"], ["Metabolism", "Xenobiotics Biodegradation and Metabolism", "Fluorobenzoate d…
K01720	2632	3081	2649	3515	3774	2834	2073	2260	2109	2748	3753	3555	5558	3495	4129	4291	3528	2879	[["Metabolism", "Carbohydrate Metabolism", "Propanoate metabolism"]]
K01722	0	0	0	0	0	0	0	0	0	0	0	0	0	0	0	0	0	0	[["Unclassified", "Metabolism", "Others"]]
K13008	0	0	0	0	0	0	0	0	0	0	0	0	0	0	0	0	0	0	[["Metabolism", "Glycan Biosynthesis and Metabolism", "Lipopolysaccharide biosynthesis proteins"]]
K01729	501	524	469	455	625	678	300	398	543	413	520	751	589	712	853	831	589	465	[["Metabolism", "Carbohydrate Metabolism", "Fructose and mannose metabolism"]]
K01728	2548	2743	2889	2363	3751	3047	2319	2790	2530	2998	2835	3424	4897	2926	2967	3963	3569	3236	[["Metabolism", "Carbohydrate Metabolism", "Pentose and glucuronate interconversions"]]
K09530	0	0	0	0	0	0	0	0	0	0	0	0	0	0	0	0	0	0	[["Genetic Information Processing", "Folding, Sorting and Degradation", "Chaperones and folding catalysts"], ["Genetic Information Processing", "Folding, Sorting and Degradation", "Protein processing in endoplasmic reticulum"]]
K09539	0	0	0	0	0	0	0	0	0	0	0	0	0	0	0	0	0	0	[["None"]]
K02188	2619	2826	2855	3583	2226	2249	1911	2525	2372	2734	3324	2603	2064	2809	2545	2658	2831	2891	[["Metabolism", "Metabolism of Cofactors and Vitamins", "Porphyrin and chlorophyll metabolism"]]
K02189	3692	3768	4201	4065	3776	3432	3159	3962	3971	3748	4566	3664	3464	3483	3341	3981	4227	3904	[["Metabolism", "Metabolism of Cofactors and Vitamins", "Porphyrin and chlorophyll metabolism"]]
K02182	5418	6537	6737	4034	5471	3976	5560	5888	5211	7792	6081	7708	6564	6106	7087	6168	6409	5669	[["Unclassified", "Metabolism", "Others"]]
K02183	0	0	0	0	0	0	0	0	0	0	0	0	0	0	0	0	0	0	[["Organismal Systems", "Sensory System", "Phototransduction - fly"], ["Organismal Systems", "Nervous System", "Long-term potentiation"], ["Organismal Systems", "Endocrine System", "GnRH signaling pathway"], ["Organismal Systems", "Circulatory System", "Vascular smooth muscle contraction"], ["Organismal Systems", "Endocrine System", "Melanogenesis"], ["Human Diseases", "Cancers", "Glioma"], ["Org…
K03769	9508	9850	10502	7463	10358	9084	8727	10958	10412	8762	8557	9624	9451	7599	8823	9132	10301	8465	[["Genetic Information Processing", "Folding, Sorting and Degradation", "Chaperones and folding catalysts"]]
K03768	15173	16115	15653	14975	15365	14448	12165	14267	12739	17543	15824	15460	17944	14697	15706	17458	17596	16889	[["Genetic Information Processing", "Folding, Sorting and Degradation", "Chaperones and folding catalysts"]]
K03767	18198	23238	21179	17442	24575	17920	24565	23687	26083	26677	21586	24481	21289	21668	22588	21102	21929	18362	[["Genetic Information Processing", "Folding, Sorting and Degradation", "Chaperones and folding catalysts"]]
K03765	1	18	3	58	6	0	8	1	9	102	24	1	7	81	14	3	21	71	[["Genetic Information Processing", "Transcription", "Transcription factors"]]
K03764	93	75	47	1542	57	70	36	27	58	182	834	33	81	245	88	62	99	272	[["Genetic Information Processing", "Transcription", "Transcription factors"]]
K03763	1646	1520	1648	3586	1745	2181	1252	1802	1663	1978	2358	1285	1803	2353	1593	1981	1833	3020	[["Metabolism", "Nucleotide Metabolism", "Pyrimidine metabolism"], ["Genetic Information Processing", "Replication and Repair", "DNA repair and recombination proteins"], ["Metabolism", "Nucleotide Metabolism", "Purine metabolism"], ["Genetic Information Processing", "Replication and Repair", "Mismatch repair"], ["Genetic Information Processing", "Replication and Repair", "Homologous recombination…
K03762	3399	3473	3594	3325	2547	2065	1753	2437	1709	3427	3879	3094	2477	3064	3394	3555	2692	3245	[["Environmental Information Processing", "Membrane Transport", "Transporters"]]
K03761	4762	5327	5234	4406	5764	4194	4510	4428	4496	6139	6391	6431	7071	6443	5535	5710	5559	6088	[["Environmental Information Processing", "Membrane Transport", "Transporters"]]
K03760	2911	3092	3144	2734	4117	3344	2574	2955	2922	2994	3535	3265	3934	3078	2960	3293	3451	3451	[["Metabolism", "Glycan Biosynthesis and Metabolism", "Lipopolysaccharide biosynthesis proteins"]]
K09457	12289	14611	13660	11178	15814	13197	15212	15732	16148	15408	13385	15598	13537	14921	14486	13474	14524	12564	[["Unclassified", "Poorly Characterized", "General function prediction only"]]
K09456	4819	5617	5596	3217	4519	3329	4014	4176	3394	6668	5082	5743	5798	4707	6373	5895	5881	4437	[["Unclassified", "Metabolism", "Lipid metabolism"]]
K09459	1014	993	1161	847	1150	1073	759	1407	1185	997	694	945	1112	778	882	1115	1134	1216	[["Metabolism", "Metabolism of Other Amino Acids", "Phosphonate and phosphinate metabolism"]]
K09458	36860	43012	41831	34097	44987	37906	40748	44292	43180	46688	39969	45472	42849	40222	43364	43386	44694	37620	[["Metabolism", "Lipid Metabolism", "Fatty acid biosynthesis"], ["Metabolism", "Lipid Metabolism", "Lipid biosynthesis proteins"]]
K00602	45250	50133	48108	43705	52840	46574	47044	49800	49200	54874	48272	52448	52152	49829	50736	49864	51524	45601	[["Metabolism", "Metabolism of Cofactors and Vitamins", "One carbon pool by folate"], ["Metabolism", "Nucleotide Metabolism", "Purine metabolism"]]
K13988	8	29	12	11	12	9	3	2	2	10	6	14	2	4	6	17	17	6	[["Metabolism", "Nucleotide Metabolism", "Purine metabolism"]]
K13985	3	1	2	0	1	2	0	1	3	2	4	1	0	0	0	0	0	1	[["Unclassified", "Metabolism", "Lipid metabolism"]]
K09981	3294	3898	3611	2096	3071	2305	2798	3247	2854	3486	3018	3663	4078	2389	3091	3874	3621	2763	[["Unclassified", "Poorly Characterized", "Function unknown"]]
K09980	917	314	349	271	390	307	215	280	216	230	843	216	304	853	204	296	191	463	[["Unclassified", "Poorly Characterized", "Function unknown"]]
K09983	3814	4075	4487	2881	4725	3670	3505	4260	3975	3422	3772	4018	5548	3999	5049	4474	3810	3897	[["Unclassified", "Poorly Characterized", "Function unknown"]]
K09982	751	762	748	581	786	590	562	570	603	656	626	652	1310	948	829	629	510	615	[["Unclassified", "Poorly Characterized", "Function unknown"]]
K09985	5808	6310	6256	5320	6773	5393	5953	6484	6215	5752	6287	7015	6684	6504	6233	5939	6231	6021	[["Unclassified", "Poorly Characterized", "Function unknown"]]
K09984	2201	1693	1764	984	1410	1128	1102	1381	1294	1349	2045	1565	1491	2017	1567	1493	1358	1733	[["Unclassified", "Poorly Characterized", "Function unknown"]]
K09987	5189	5758	5639	4255	6087	4649	5461	5871	5680	5092	5460	6155	6247	6252	6041	5390	4757	5453	[["Unclassified", "Poorly Characterized", "Function unknown"]]
K09986	5179	5607	5529	4235	5987	4598	5367	5829	5722	5085	5495	6122	6251	6219	6031	5363	4764	5334	[["Unclassified", "Poorly Characterized", "Function unknown"]]
K09989	7545	8048	8557	6317	8346	6553	7483	8758	8712	7266	7326	8063	7209	7357	7183	7283	7077	7304	[["Unclassified", "Poorly Characterized", "Function unknown"]]
K09988	216	174	134	636	248	184	115	111	96	271	307	141	203	530	174	189	75	419	[["Unclassified", "Poorly Characterized", "Function unknown"]]
K12583	1769	2184	1730	930	1437	776	1020	1105	853	2054	1865	1969	2085	1953	2478	2629	2000	1456	[["Metabolism", "Glycan Biosynthesis and Metabolism", "Glycosyltransferases"]]
K12582	87	71	45	1579	67	71	28	28	54	184	858	30	108	225	91	55	78	214	[["Metabolism", "Glycan Biosynthesis and Metabolism", "Glycosyltransferases"]]
K12589	0	0	0	0	0	0	0	0	0	0	0	0	0	0	0	0	0	0	[["Genetic Information Processing", "Folding, Sorting and Degradation", "RNA degradation"]]
K11720	9925	10493	10437	10114	12177	9506	9375	10712	10279	9572	11463	11303	12580	10738	11036	10306	10880	10529	[["Environmental Information Processing", "Membrane Transport", "ABC transporters"], ["Environmental Information Processing", "Membrane Transport", "Transporters"]]
K09759	1123	1500	1126	1284	1241	707	1110	951	710	1447	1503	1055	1478	1142	1167	1966	1473	1052	[["Genetic Information Processing", "Translation", "Aminoacyl-tRNA biosynthesis"], ["Metabolism", "Amino Acid Metabolism", "Amino acid related enzymes"]]
K10985	0	9	3	38	0	11	0	0	0	1	15	0	0	1	0	0	1	17	[["Environmental Information Processing", "Membrane Transport", "Phosphotransferase system (PTS)"], ["Environmental Information Processing", "Membrane Transport", "Transporters"], ["Metabolism", "Carbohydrate Metabolism", "Galactose metabolism"]]
K10984	5	14	4	58	0	19	5	1	1	2	16	1	3	6	1	10	3	34	[["Environmental Information Processing", "Membrane Transport", "Phosphotransferase system (PTS)"], ["Environmental Information Processing", "Membrane Transport", "Transporters"], ["Metabolism", "Carbohydrate Metabolism", "Galactose metabolism"]]
K07468	2	3	0	0	3	2	3	7	8	0	0	0	0	0	0	0	0	8	[["Unclassified", "Genetic Information Processing", "Replication, recombination and repair proteins"]]
K07469	0	4	0	36	142	12	20	10	1	2	102	36	2	134	22	1	3	12	[["Unclassified", "Metabolism", "Others"]]
K07464	2085	1634	1885	2355	1603	2019	1267	1561	1603	1942	1991	1610	1496	1790	1453	1643	2455	2217	[["Unclassified", "Genetic Information Processing", "Replication, recombination and repair proteins"]]
K07465	4085	4988	4525	2704	3762	2545	3519	3515	3213	5729	3982	4925	4843	3979	5462	5108	5168	3784	[["Unclassified", "Genetic Information Processing", "Replication, recombination and repair proteins"]]
K07466	180	118	150	46	37	54	48	96	107	47	73	56	22	49	85	54	28	50	[["Genetic Information Processing", "Replication and Repair", "DNA repair and recombination proteins"], ["Genetic Information Processing", "Replication and Repair", "Mismatch repair"], ["Genetic Information Processing", "Transcription", "Transcription factors"], ["Genetic Information Processing", "Replication and Repair", "Nucleotide excision repair"], ["Genetic Information Processing", "Replicat…
K07467	134	102	100	957	379	288	192	65	147	389	740	172	231	847	608	319	138	645	[["Unclassified", "Genetic Information Processing", "Replication, recombination and repair proteins"]]
K07460	21350	24440	23199	20690	25326	21155	22816	24083	23948	26415	23634	25328	25035	23574	24398	23756	25163	21573	[["Unclassified", "Genetic Information Processing", "Replication, recombination and repair proteins"]]
K07461	15163	15631	14817	13879	18198	14164	15382	16323	16609	17054	17919	17442	18926	19085	17225	15957	15177	16769	[["Unclassified", "Genetic Information Processing", "Replication, recombination and repair proteins"]]
K07462	17680	19872	19141	19093	22487	19698	19965	21350	21714	21046	20074	20749	20672	20133	19520	19169	20341	19528	[["Genetic Information Processing", "Replication and Repair", "Base excision repair"], ["Genetic Information Processing", "Replication and Repair", "Mismatch repair"], ["Genetic Information Processing", "Replication and Repair", "Homologous recombination"], ["Genetic Information Processing", "Replication and Repair", "DNA repair and recombination proteins"]]
K07463	180	118	150	46	37	54	48	96	107	47	73	56	22	49	85	54	28	50	[["Unclassified", "Genetic Information Processing", "Replication, recombination and repair proteins"]]
K10679	613	554	423	2062	729	1078	244	335	374	860	1292	418	1600	973	1170	716	727	1216	[["Metabolism", "Xenobiotics Biodegradation and Metabolism", "Nitrotoluene degradation"]]
K10678	551	594	600	468	470	397	537	637	485	737	518	682	413	663	932	437	531	420	[["Metabolism", "Xenobiotics Biodegradation and Metabolism", "Nitrotoluene degradation"]]
K10671	0	0	0	0	0	0	0	0	0	0	0	0	0	0	0	0	0	0	[["Unclassified", "Metabolism", "Others"]]
K10670	92	102	79	816	65	225	397	83	159	133	1202	134	158	540	376	74	248	733	[["Unclassified", "Metabolism", "Others"]]
K10673	84	200	180	62	111	70	108	104	79	166	106	204	262	274	150	180	91	124	[["Unclassified", "Metabolism", "Others"]]
K10672	14	23	32	137	27	32	72	24	24	34	232	18	28	168	121	3	24	125	[["Unclassified", "Metabolism", "Others"]]
K10674	1391	1471	1581	813	1297	960	1004	1255	928	1668	1406	1584	1170	1201	1501	1631	1369	1012	[["Metabolism", "Amino Acid Metabolism", "Glycine, serine and threonine metabolism"]]
K10677	352	410	307	170	206	102	126	179	128	543	368	342	401	622	564	333	353	473	[["Unclassified", "Metabolism", "Others"]]
K10676	1420	2134	2155	1458	1968	1280	1969	1938	2257	2266	1824	2553	2286	2039	1742	1877	1735	2569	[["Metabolism", "Xenobiotics Biodegradation and Metabolism", "Chlorocyclohexane and chlorobenzene degradation"]]
K08726	120	136	75	69	184	102	49	93	67	86	96	175	152	117	228	129	57	40	[["Metabolism", "Lipid Metabolism", "Arachidonic acid metabolism"], ["Metabolism", "Xenobiotics Biodegradation and Metabolism", "Chloroalkane and chloroalkene degradation"], ["Cellular Processes", "Transport and Catabolism", "Peroxisome"]]
K08724	120	50	35	96	52	174	56	11	30	48	85	33	239	110	93	93	82	282	[["Metabolism", "Glycan Biosynthesis and Metabolism", "Peptidoglycan biosynthesis"]]
K08722	250	183	166	2122	175	264	92	82	124	302	1158	97	210	395	161	162	204	462	[["Metabolism", "Nucleotide Metabolism", "Pyrimidine metabolism"], ["Metabolism", "Metabolism of Cofactors and Vitamins", "Nicotinate and nicotinamide metabolism"], ["Metabolism", "Nucleotide Metabolism", "Purine metabolism"]]
K08723	12	35	15	163	19	30	11	5	17	165	70	30	53	110	55	141	35	113	[["Metabolism", "Nucleotide Metabolism", "Pyrimidine metabolism"], ["Metabolism", "Metabolism of Cofactors and Vitamins", "Nicotinate and nicotinamide metabolism"], ["Metabolism", "Nucleotide Metabolism", "Purine metabolism"]]
K08720	601	662	638	379	604	445	597	763	561	589	551	721	864	549	560	478	540	385	[["Human Diseases", "Infectious Diseases", "Vibrio cholerae pathogenic cycle"]]
K08721	22	14	44	6	42	17	0	4	4	10	50	7	69	38	14	5	10	59	[["Unclassified", "Cellular Processes and Signaling", "Pores ion channels"]]
K08728	115	23	16	45	52	205	32	30	22	18	48	17	84	79	68	87	44	261	[["Metabolism", "Nucleotide Metabolism", "Pyrimidine metabolism"]]
K10187	293	275	252	141	137	148	92	105	176	258	283	280	230	203	270	363	260	145	[["Metabolism", "Metabolism of Terpenoids and Polyketides", "Sesquiterpenoid biosynthesis"]]
K00119	5873	7080	7740	5199	7376	5710	6537	7102	6932	6839	6842	8149	8340	7592	8088	7211	6688	7030	[["Metabolism", "Metabolism of Other Amino Acids", "Phosphonate and phosphinate metabolism"]]
K00118	2871	2982	2798	1900	2827	1891	2737	2945	3163	2791	2982	3003	2685	3163	2302	2482	2339	3165	[["Unclassified", "Metabolism", "Others"]]
K00449	2792	2887	3213	1884	2709	2050	2148	2534	2235	3042	2906	3202	3812	2938	3265	3185	2717	3413	[["Metabolism", "Xenobiotics Biodegradation and Metabolism", "Polycyclic aromatic hydrocarbon degradation"], ["Metabolism", "Xenobiotics Biodegradation and Metabolism", "Benzoate degradation"]]
K00448	2466	2546	2779	1700	2367	1832	1998	2199	1941	2741	2582	2881	3464	2776	3001	2854	2484	2734	[["Metabolism", "Xenobiotics Biodegradation and Metabolism", "Polycyclic aromatic hydrocarbon degradation"], ["Metabolism", "Xenobiotics Biodegradation and Metabolism", "Benzoate degradation"]]
K00115	82	124	245	71	91	61	54	86	81	64	76	160	373	70	60	108	90	277	[["Metabolism", "Carbohydrate Metabolism", "Pentose phosphate pathway"]]
K00446	3245	3305	3575	2153	2950	2654	2364	3030	2823	3123	2911	3125	3631	2659	3442	3418	2952	3059	[["Metabolism", "Xenobiotics Biodegradation and Metabolism", "Xylene degradation"], ["Metabolism", "Xenobiotics Biodegradation and Metabolism", "Chlorocyclohexane and chlorobenzene degradation"], ["Metabolism", "Xenobiotics Biodegradation and Metabolism", "Styrene degradation"], ["Metabolism", "Xenobiotics Biodegradation and Metabolism", "Benzoate degradation"]]
K00117	13253	17822	16470	13160	20619	14819	20142	18769	20578	19011	16362	19435	18263	16471	16451	16347	17442	14658	[["Metabolism", "Carbohydrate Metabolism", "Pentose phosphate pathway"]]
K00116	1765	2163	1701	3175	1845	1380	1276	1453	1356	2674	3121	1877	1813	2452	2710	2047	1907	2736	[["Metabolism", "Carbohydrate Metabolism", "Pyruvate metabolism"]]
K00111	22767	27002	25915	22509	26663	21185	24371	24872	24475	30391	26865	28713	28527	25522	28508	27617	27554	22897	[["Metabolism", "Lipid Metabolism", "Glycerophospholipid metabolism"]]
K00442	0	2	0	1	0	5	2	1	0	0	0	0	0	0	2	0	1	0	[["Metabolism", "Energy Metabolism", "Methane metabolism"]]
K00113	850	813	801	2076	679	521	699	766	670	903	1415	758	712	1052	756	584	812	650	[["Metabolism", "Lipid Metabolism", "Glycerophospholipid metabolism"]]
K00112	400	300	255	1787	232	179	268	272	349	416	977	143	352	611	333	189	344	383	[["Metabolism", "Lipid Metabolism", "Glycerophospholipid metabolism"]]
K01539	9	6	3	16	6	5	0	1	1	4	5	7	9	0	12	28	7	3	[["Organismal Systems", "Circulatory System", "Cardiac muscle contraction"], ["Organismal Systems", "Digestive System", "Pancreatic secretion"], ["Organismal Systems", "Excretory System", "Aldosterone-regulated sodium reabsorption"], ["Organismal Systems", "Digestive System", "Gastric acid secretion"], ["Organismal Systems", "Digestive System", "Carbohydrate digestion and absorption"], ["Organism…
K01531	2654	2743	2824	5191	4372	3683	2166	2402	2334	3157	4526	3293	5176	3747	3937	3743	3244	3465	[["Unclassified", "Metabolism", "Energy metabolism"]]
K04720	1378	1114	1066	3260	1477	1638	951	1000	1158	1845	2519	1238	972	1968	876	1621	2467	2044	[["Metabolism", "Metabolism of Cofactors and Vitamins", "Porphyrin and chlorophyll metabolism"]]
K01533	36104	41021	39240	34226	41973	34437	35701	39820	37978	41471	39201	40704	42141	37459	41848	40524	41127	35951	[["Unclassified", "Metabolism", "Energy metabolism"]]
K01534	17681	18426	17171	21808	18048	17698	14857	16908	16201	18466	20674	17000	19035	20995	19922	17610	16558	18940	[["Unclassified", "Metabolism", "Energy metabolism"]]
K01535	726	624	650	320	696	566	458	826	613	446	510	518	538	392	579	509	529	666	[["Metabolism", "Energy Metabolism", "Oxidative phosphorylation"]]
K01537	9153	8853	8830	8613	8967	8890	7839	8958	8856	9284	8406	8465	8779	8210	7967	9095	10665	8983	[["Unclassified", "Metabolism", "Energy metabolism"]]
K14358	0	0	0	0	0	0	0	0	0	0	0	0	0	0	0	0	0	0	[["None"]]
K14605	16	0	10	0	0	0	12	0	0	52	26	0	2	36	0	26	4	284	[["Metabolism", "Metabolism of Terpenoids and Polyketides", "Carotenoid biosynthesis"]]
K14606	16	0	10	0	0	0	12	0	0	52	26	0	2	36	0	26	4	284	[["Metabolism", "Metabolism of Terpenoids and Polyketides", "Carotenoid biosynthesis"]]
K00413	8411	9195	8937	6951	10763	7934	8142	9306	8895	8183	9112	9775	11347	9565	10070	9032	8667	9325	[["Organismal Systems", "Circulatory System", "Cardiac muscle contraction"], ["Human Diseases", "Neurodegenerative Diseases", "Huntington's disease"], ["Metabolism", "Energy Metabolism", "Oxidative phosphorylation"], ["Human Diseases", "Neurodegenerative Diseases", "Parkinson's disease"], ["Human Diseases", "Neurodegenerative Diseases", "Alzheimer's disease"]]
K10120	93	33	11	27	152	71	30	6	12	124	84	49	177	296	59	84	31	156	[["Environmental Information Processing", "Membrane Transport", "Transporters"]]
K05600	10	11	27	7	11	18	1	3	3	8	35	6	12	8	12	2	8	66	[["Metabolism", "Xenobiotics Biodegradation and Metabolism", "Aminobenzoate degradation"], ["Metabolism", "Energy Metabolism", "Nitrogen metabolism"]]
K05777	1036	1176	1070	831	890	714	835	986	866	1135	1088	1161	1046	1225	1345	966	1053	918	[["Environmental Information Processing", "Membrane Transport", "Transporters"]]
K03972	445	503	532	320	417	337	449	551	446	515	309	290	208	374	610	484	448	358	[["Unclassified", "Genetic Information Processing", "Others"]]
K03973	6104	8713	7724	7648	9034	6826	9877	8756	9746	10118	9157	9619	8335	8590	7965	8000	7965	7470	[["Genetic Information Processing", "Transcription", "Transcription factors"]]
K03970	2613	2879	2773	3390	2485	1693	2528	2636	2826	2841	3676	3208	2791	3217	2299	2327	2281	3294	[["Unclassified", "Genetic Information Processing", "Others"]]
K03971	21	25	7	152	14	18	10	1	9	152	51	1	8	100	14	2	25	127	[["Unclassified", "Genetic Information Processing", "Others"]]
K03976	5141	6873	6153	7222	8115	8106	8556	7915	8722	9266	7148	7510	6562	7618	6867	6905	7346	6670	[["Unclassified", "Poorly Characterized", "Function unknown"]]
K03977	21960	25050	23659	21599	26016	22180	23126	24633	24368	26780	24153	25738	25617	24247	25013	24409	25510	22725	[["Genetic Information Processing", "Translation", "Ribosome Biogenesis"]]
K03974	2304	2551	2415	3217	2333	1581	2126	2220	2529	2479	3399	2738	2606	2993	2145	2162	1957	3184	[["Genetic Information Processing", "Transcription", "Transcription factors"]]
K03975	9891	10663	10136	7894	8707	7965	7606	8543	7866	11048	9808	10544	9669	8564	10783	11108	11166	8894	[["Unclassified", "Poorly Characterized", "Function unknown"]]
K03978	16846	19125	18292	18536	21810	18920	19350	20679	21082	20149	19450	19693	20121	19662	18994	18420	18793	18426	[["Unclassified", "Poorly Characterized", "General function prediction only"]]
K03979	22007	25095	23658	21607	26028	22163	23181	24659	24395	26811	24156	25748	25631	24257	25009	24410	25521	22692	[["Genetic Information Processing", "Translation", "Ribosome Biogenesis"]]
K13378	1591	1112	1133	3105	982	2346	1030	1016	961	1449	1817	825	938	1624	852	1170	1077	1559	[["Metabolism", "Energy Metabolism", "Oxidative phosphorylation"]]
K02372	18725	21622	20807	19487	24000	19579	21119	23225	23177	22172	21206	22536	22464	20720	21334	20807	21979	20440	[["Metabolism", "Lipid Metabolism", "Fatty acid biosynthesis"], ["Metabolism", "Lipid Metabolism", "Lipid biosynthesis proteins"]]
K02371	4508	4333	4088	4790	4105	4333	3736	3898	4054	4597	5228	4484	4391	5411	4027	4067	3854	5528	[["Metabolism", "Lipid Metabolism", "Fatty acid biosynthesis"], ["Metabolism", "Lipid Metabolism", "Lipid biosynthesis proteins"]]
K02377	9758	11574	10677	10462	12508	11660	12784	12484	12757	12006	10984	11579	10116	11169	10699	10513	11719	9007	[["Metabolism", "Carbohydrate Metabolism", "Amino sugar and nucleotide sugar metabolism"], ["Metabolism", "Carbohydrate Metabolism", "Fructose and mannose metabolism"]]
K02379	15829	17129	17117	12960	17431	13567	14449	16580	15384	17270	16375	18281	17954	15442	17168	17397	17961	14867	[["Unclassified", "Metabolism", "Energy metabolism"]]
K03396	588	668	716	509	683	570	680	694	597	768	691	806	1190	877	866	707	797	721	[["Metabolism", "Energy Metabolism", "Methane metabolism"]]
K03397	0	0	0	0	0	0	0	0	0	0	0	0	0	0	0	0	0	0	[["Unclassified", "Metabolism", "Others"]]
K03394	12271	12765	13082	11021	12149	10377	10084	11845	10988	13024	13000	12437	12393	12140	12897	12640	13296	11028	[["Metabolism", "Metabolism of Cofactors and Vitamins", "Porphyrin and chlorophyll metabolism"]]
K03395	15	15	28	14	20	25	3	19	22	0	4	2	0	0	0	11	5	12	[["Unclassified", "Metabolism", "Others"]]
K03392	6837	9916	9250	6271	9330	6167	9249	9180	9589	9365	7913	10252	10237	7780	8383	9361	8777	8170	[["Metabolism", "Amino Acid Metabolism", "Tryptophan metabolism"]]
K03393	0	0	0	0	0	0	0	0	0	0	0	0	0	0	0	0	0	0	[["Metabolism", "Amino Acid Metabolism", "Tryptophan metabolism"]]
K03390	1412	1434	1324	1633	1441	2250	1212	1485	1382	1546	1271	1695	924	901	612	1168	2343	1327	[["Metabolism", "Energy Metabolism", "Methane metabolism"]]
K03391	1308	1622	1501	948	1203	806	1022	1293	1298	1204	1196	1286	1105	1195	1585	1254	1188	1012	[["Metabolism", "Xenobiotics Biodegradation and Metabolism", "Chlorocyclohexane and chlorobenzene degradation"], ["Metabolism", "Xenobiotics Biodegradation and Metabolism", "Fluorobenzoate degradation"]]
K03399	90	95	123	674	68	59	28	70	71	137	466	56	103	274	240	73	142	398	[["Metabolism", "Metabolism of Cofactors and Vitamins", "Porphyrin and chlorophyll metabolism"]]
K03027	0	0	0	0	0	0	0	0	0	0	0	0	0	0	0	0	0	0	[["None"]]
K12136	31	6	4	53	8	2	1	0	9	3	14	8	4	45	13	11	13	48	[["Unclassified", "Metabolism", "Energy metabolism"]]
K12137	777	682	701	616	783	828	654	798	744	753	560	975	546	336	289	631	1558	701	[["Unclassified", "Metabolism", "Energy metabolism"]]
K06610	281	163	238	98	130	154	99	109	49	169	236	178	386	159	254	324	183	265	[["Environmental Information Processing", "Membrane Transport", "Transporters"]]
K12138	26	4	1	28	9	2	1	0	0	1	1	4	0	14	13	4	0	88	[["Unclassified", "Metabolism", "Energy metabolism"]]
K12139	708	612	622	535	723	758	552	640	588	663	514	898	457	337	220	567	1493	646	[["Unclassified", "Metabolism", "Energy metabolism"]]
K11444	151	117	216	78	117	118	30	69	87	98	209	96	164	191	131	109	98	296	[["Environmental Information Processing", "Signal Transduction", "Two-component system"]]
K11440	10	9	11	0	1	4	2	1	0	0	0	0	125	26	35	0	8	0	[["Metabolism", "Amino Acid Metabolism", "Glycine, serine and threonine metabolism"]]
K11443	6789	6636	6913	5054	7279	5690	6204	6845	6647	6031	7106	7405	7076	7404	6816	6406	6551	6263	[["Cellular Processes", "Cell Growth and Death", "Cell cycle - Caulobacter"], ["Environmental Information Processing", "Signal Transduction", "Two-component system"]]
K11442	25	35	10	7	29	6	4	19	18	0	18	30	12	81	16	63	15	10	[["Unclassified", "Metabolism", "Carbohydrate metabolism"]]
K00612	9444	10622	11054	7305	10917	8018	10325	11118	10767	11414	8545	10580	9529	7355	9858	9681	11472	8010	[["Unclassified", "Genetic Information Processing", "Protein folding and associated processing"]]
K00613	319	207	375	148	122	116	124	131	104	316	243	216	235	205	345	307	242	163	[["Metabolism", "Amino Acid Metabolism", "Glycine, serine and threonine metabolism"], ["Metabolism", "Amino Acid Metabolism", "Arginine and proline metabolism"]]
K00610	1489	927	802	4091	952	2518	880	720	848	1621	2376	732	1037	2507	1445	1308	1150	1941	[["Metabolism", "Nucleotide Metabolism", "Pyrimidine metabolism"], ["Metabolism", "Amino Acid Metabolism", "Alanine, aspartate and glutamate metabolism"]]
K00611	11979	14776	13335	12738	14008	11647	13594	13918	14010	17411	13718	15053	13035	13029	14439	14262	15489	11987	[["Metabolism", "Amino Acid Metabolism", "Arginine and proline metabolism"]]
K00616	20563	24770	23162	19688	25565	19505	22803	24018	23702	25603	23132	25057	24315	22252	24733	23572	24963	19719	[["Metabolism", "Carbohydrate Metabolism", "Pentose phosphate pathway"]]
K00617	0	0	0	0	0	0	0	0	0	0	0	0	0	0	0	0	0	0	[["Unclassified", "Metabolism", "Others"]]
K00614	317	229	235	202	268	189	176	252	221	192	279	200	348	190	299	316	198	520	[["Unclassified", "Metabolism", "Others"]]
K00615	39757	44743	42861	40015	44979	37703	40696	43791	42175	47177	44036	44200	43879	41356	42766	44758	46297	39573	[["Metabolism", "Carbohydrate Metabolism", "Pentose phosphate pathway"], ["Metabolism", "Energy Metabolism", "Carbon fixation in photosynthetic organisms"], ["Metabolism", "Metabolism of Terpenoids and Polyketides", "Biosynthesis of ansamycins"]]
K00619	7781	10476	9395	7546	10192	8321	10888	10499	11011	11760	9314	11152	9053	8189	8546	9898	11308	7248	[["Metabolism", "Amino Acid Metabolism", "Arginine and proline metabolism"]]
K10863	0	0	0	0	0	0	0	0	0	0	0	0	0	0	0	0	0	0	[["None"]]
K07874	0	0	0	0	0	0	0	0	0	0	0	0	0	0	0	0	0	0	[["None"]]
K06234	0	0	0	0	0	0	0	0	0	0	0	0	0	0	0	0	0	0	[["Environmental Information Processing", "Signaling Molecules and Interaction", "GTP-binding proteins"], ["Environmental Information Processing", "Signal Transduction", "Hedgehog signaling pathway"]]
K10240	2097	2922	2264	1464	2027	1221	2150	1776	1591	2829	2437	2622	3129	1846	2449	4233	3172	1654	[["Environmental Information Processing", "Membrane Transport", "ABC transporters"], ["Environmental Information Processing", "Membrane Transport", "Transporters"]]
K10241	2008	2799	2155	1413	1966	1176	2056	1698	1550	2650	2333	2439	3049	1779	2303	4077	3021	1595	[["Environmental Information Processing", "Membrane Transport", "ABC transporters"], ["Environmental Information Processing", "Membrane Transport", "Transporters"]]
K10242	2020	2721	2095	1360	1902	1171	1983	1652	1463	2472	2190	2250	2924	1653	2190	3882	2804	1489	[["Environmental Information Processing", "Membrane Transport", "ABC transporters"], ["Environmental Information Processing", "Membrane Transport", "Transporters"]]
K10243	2825	3665	3072	1661	2246	1550	1973	2114	1656	3294	2737	3032	3296	2809	3468	4246	3130	2224	[["Environmental Information Processing", "Membrane Transport", "ABC transporters"], ["Environmental Information Processing", "Membrane Transport", "Transporters"]]
K04110	1398	1469	2067	1103	1779	1123	1370	1882	2079	1258	891	1097	1063	557	1012	1094	1003	1096	[["Metabolism", "Xenobiotics Biodegradation and Metabolism", "Aminobenzoate degradation"], ["Metabolism", "Xenobiotics Biodegradation and Metabolism", "Benzoate degradation"]]
K04113	78	104	210	40	40	44	66	52	64	66	72	77	40	38	61	52	70	48	[["Metabolism", "Xenobiotics Biodegradation and Metabolism", "Benzoate degradation"]]
K04112	78	104	210	40	40	44	66	52	64	66	72	77	40	38	61	53	70	48	[["Metabolism", "Xenobiotics Biodegradation and Metabolism", "Benzoate degradation"]]
K04115	78	104	210	40	40	44	66	52	64	66	72	77	40	38	61	52	70	48	[["Metabolism", "Xenobiotics Biodegradation and Metabolism", "Benzoate degradation"]]
K04114	78	104	210	40	40	44	66	52	64	66	72	77	40	38	61	52	70	48	[["Metabolism", "Xenobiotics Biodegradation and Metabolism", "Benzoate degradation"]]
K04117	373	428	357	165	255	156	153	210	141	340	394	370	439	481	602	396	383	292	[["Metabolism", "Xenobiotics Biodegradation and Metabolism", "Benzoate degradation"]]
K04116	668	771	700	344	629	469	307	501	360	593	665	677	749	806	1071	807	632	507	[["Metabolism", "Xenobiotics Biodegradation and Metabolism", "Benzoate degradation"]]
K04118	2	11	15	4	4	15	0	4	3	0	0	5	6	4	12	2	3	2	[["Metabolism", "Xenobiotics Biodegradation and Metabolism", "Benzoate degradation"]]
K05517	109	76	96	1521	90	109	24	25	57	200	860	37	61	186	89	57	100	294	[["Unclassified", "Cellular Processes and Signaling", "Pores ion channels"]]
K07705	747	694	656	577	783	788	606	705	615	672	602	961	654	413	325	664	1542	651	[["Environmental Information Processing", "Signal Transduction", "Two-component system"]]
K07704	752	728	660	636	789	808	625	713	615	675	646	963	657	469	348	665	1546	734	[["Metabolism", "Enzyme Families", "Protein kinases"], ["Environmental Information Processing", "Signal Transduction", "Two-component system"]]
K07707	119	133	106	406	98	154	67	82	40	65	135	81	80	296	116	179	63	293	[["Environmental Information Processing", "Signal Transduction", "Two-component system"]]
K07706	109	137	107	462	109	169	60	85	62	63	188	85	74	242	113	181	43	298	[["Metabolism", "Enzyme Families", "Protein kinases"], ["Environmental Information Processing", "Signal Transduction", "Two-component system"]]
K07701	3	23	7	714	9	18	10	1	11	152	382	2	8	87	14	3	25	101	[["Metabolism", "Enzyme Families", "Protein kinases"], ["Environmental Information Processing", "Signal Transduction", "Two-component system"]]
K07700	73	86	46	1674	60	88	39	28	59	332	866	31	85	284	101	54	98	277	[["Metabolism", "Enzyme Families", "Protein kinases"], ["Environmental Information Processing", "Signal Transduction", "Two-component system"]]
K07703	4	39	9	746	14	18	17	2	20	253	399	2	14	167	38	3	46	167	[["Environmental Information Processing", "Signal Transduction", "Two-component system"]]
K07702	73	86	46	1674	60	88	39	28	59	332	869	31	85	284	101	54	98	277	[["Environmental Information Processing", "Signal Transduction", "Two-component system"]]
K07709	1664	1799	1863	1977	1962	1625	1650	2193	2195	1696	1470	1778	948	747	888	1251	2523	1161	[["Metabolism", "Enzyme Families", "Protein kinases"], ["Environmental Information Processing", "Signal Transduction", "Two-component system"]]
K07708	8694	9000	9419	8213	10880	8293	8301	9512	9218	8472	9753	9877	11569	9423	9668	9187	8858	9277	[["Metabolism", "Enzyme Families", "Protein kinases"], ["Environmental Information Processing", "Signal Transduction", "Two-component system"]]
K01955	24100	27050	26212	24472	28343	24902	24629	27485	26929	29027	26023	27759	28229	26188	27496	26890	27770	25797	[["Metabolism", "Nucleotide Metabolism", "Pyrimidine metabolism"], ["Metabolism", "Amino Acid Metabolism", "Alanine, aspartate and glutamate metabolism"]]
K13042	0	0	0	0	0	0	0	0	0	0	0	0	0	0	0	0	0	3	[["Unclassified", "Metabolism", "Amino acid metabolism"]]
K09934	1631	2303	2005	1712	2642	1882	2636	2357	2751	2078	1802	2096	1665	1589	1802	1714	2083	1395	[["Unclassified", "Poorly Characterized", "Function unknown"]]
K09935	2610	2876	3085	3760	2641	2290	2180	2837	2432	2850	3240	2367	3034	2130	2356	3701	2921	3075	[["Unclassified", "Poorly Characterized", "Function unknown"]]
K06216	91	27	0	48	31	95	31	9	12	17	41	19	60	65	32	80	27	184	[["Unclassified", "Cellular Processes and Signaling", "Other ion-coupled transporters"]]
K09937	4735	4872	5260	3794	6355	4945	4438	5294	4822	4996	4942	5632	6955	4964	5641	5381	5537	5027	[["Unclassified", "Poorly Characterized", "Function unknown"]]
K13745	1731	2052	1832	1124	1667	1009	1445	1414	1265	2207	1737	2048	2246	1500	1989	3009	2143	1644	[["Metabolism", "Amino Acid Metabolism", "Glycine, serine and threonine metabolism"]]
K13746	0	0	0	0	0	0	0	0	0	0	0	0	0	0	0	0	0	18	[["Metabolism", "Amino Acid Metabolism", "Arginine and proline metabolism"]]
K13747	3406	3229	2993	5047	3344	4456	2455	3170	3187	3344	3693	2367	3341	3986	2876	3317	2926	3789	[["Metabolism", "Amino Acid Metabolism", "Arginine and proline metabolism"]]
K13740	0	0	0	0	0	0	0	0	0	0	0	0	0	0	0	0	0	0	[["Human Diseases", "Infectious Diseases", "Bacterial invasion of epithelial cells"]]
K13741	0	0	0	0	0	0	0	0	0	0	0	0	0	0	0	0	0	0	[["Human Diseases", "Infectious Diseases", "Bacterial invasion of epithelial cells"]]
K13742	0	0	0	0	0	0	0	0	0	0	0	0	0	0	0	0	0	0	[["Human Diseases", "Infectious Diseases", "Bacterial invasion of epithelial cells"], ["Human Diseases", "Infectious Diseases", "Shigellosis"]]
K06211	117	111	109	1915	82	175	49	65	81	210	908	50	85	288	117	94	105	435	[["Genetic Information Processing", "Transcription", "Transcription factors"]]
K06212	136	95	122	1639	132	158	54	32	75	271	897	193	242	312	159	140	137	464	[["Unclassified", "Cellular Processes and Signaling", "Other ion-coupled transporters"]]
K09933	3811	3573	4129	2882	5298	3762	3114	3848	3826	3619	3799	4001	5687	3359	3991	4111	4113	4179	[["Unclassified", "Poorly Characterized", "Function unknown"]]
K02618	1600	1603	2081	2549	1691	1171	1171	1597	1634	1518	2049	1329	2076	1178	1593	1513	1180	1872	[["Unclassified", "Metabolism", "Energy metabolism"]]
K02619	4965	4531	4365	6351	5800	5830	3721	4033	3739	4625	6059	4937	7000	5418	4925	5405	5766	5502	[["Metabolism", "Metabolism of Cofactors and Vitamins", "Folate biosynthesis"]]
K02968	21580	24782	23320	20010	25626	21783	22998	24397	24111	26242	22983	25500	25257	23675	24531	23882	25186	22364	[["Genetic Information Processing", "Translation", "Ribosome"]]
K02966	0	0	0	0	0	0	0	0	0	0	0	0	0	0	0	0	0	0	[["Genetic Information Processing", "Translation", "Ribosome"]]
K02967	22012	25099	23659	21607	26045	22192	23193	24659	24401	26778	24156	25757	25632	24251	25026	24411	25522	22721	[["Genetic Information Processing", "Translation", "Ribosome"]]
K02616	7184	8416	7776	6004	6076	4498	6060	5889	4753	10361	7893	8707	9019	6655	9431	9084	9156	5711	[["Genetic Information Processing", "Transcription", "Transcription factors"]]
K02965	21996	25098	23651	21567	26042	22192	23192	24659	24397	26742	24148	25735	25630	24180	24950	24409	25521	22683	[["Genetic Information Processing", "Translation", "Ribosome"]]
K02962	0	0	0	0	0	0	0	0	0	0	0	0	0	0	0	0	0	0	[["Genetic Information Processing", "Translation", "Ribosome"]]
K02611	4566	5235	5116	4303	3987	2994	3662	3775	3008	6155	5189	5277	6043	4129	5887	5591	5533	4155	[["Unclassified", "Poorly Characterized", "Function unknown"]]
K02613	4404	4743	5029	4292	4165	2944	3620	4107	3754	4506	4723	4045	5253	3370	4541	5173	4499	4141	[["Unclassified", "Metabolism", "Energy metabolism"]]
K03569	22611	25855	24280	23408	27212	23288	23944	25590	26017	28178	25388	27184	26594	25326	25560	25160	26383	25092	[["Genetic Information Processing", "Replication and Repair", "Chromosome"], ["Cellular Processes", "Cell Motility", "Cytoskeleton proteins"]]
K03568	23223	27478	26391	21032	30944	23708	27069	29004	28983	28541	24878	29370	29296	24394	27391	27123	28789	22960	[["Metabolism", "Enzyme Families", "Peptidases"]]
K03565	17410	19707	18487	17410	20495	17577	18567	18696	18839	22482	20088	21234	20896	19852	20038	19713	20938	18348	[["Unclassified", "Poorly Characterized", "General function prediction only"]]
K06218	2453	2854	2579	1563	2301	2003	1769	2650	2464	2376	2099	2809	2694	2323	2695	2438	2833	2107	[["Unclassified", "Poorly Characterized", "Function unknown"]]
K03567	2452	2809	2597	4212	3886	2873	2395	2617	2237	2719	3862	3023	5190	2603	3049	3709	3519	2828	[["Genetic Information Processing", "Transcription", "Transcription factors"]]
K03566	19447	21244	22459	17492	24773	18538	19806	21992	20597	20832	21557	24403	27323	23220	23537	21792	21155	20642	[["Genetic Information Processing", "Transcription", "Transcription factors"]]
K03561	31442	33354	34520	29394	38234	32550	31661	37747	37402	31973	30775	32228	33485	29560	30656	30911	33314	31761	[["Unclassified", "Cellular Processes and Signaling", "Cell motility and secretion"]]
K03560	4042	3882	4409	4564	5681	4262	3484	4417	4407	3775	4588	4201	5792	3522	4155	4241	4539	4660	[["Unclassified", "Cellular Processes and Signaling", "Cell motility and secretion"]]
K03563	5271	5980	5405	7278	6294	5144	4200	5017	4224	6697	6915	6478	7527	5638	6504	5756	7469	5874	[["Environmental Information Processing", "Signal Transduction", "Two-component system"]]
K03562	15544	18062	17881	14949	21390	16960	18690	20201	20590	19630	17373	20222	19089	16816	17885	17542	18955	16412	[["Unclassified", "Cellular Processes and Signaling", "Cell motility and secretion"]]
K06430	1	0	0	0	0	0	2	0	0	0	0	0	1	1	1	0	0	0	[["Unclassified", "Cellular Processes and Signaling", "Sporulation"]]
K01709	5396	7442	6832	5437	8193	6806	8966	8210	8800	9135	6798	8499	6034	6507	6522	6767	8232	5528	[["Metabolism", "Carbohydrate Metabolism", "Amino sugar and nucleotide sugar metabolism"]]
K01708	1474	1552	1811	1165	1478	1206	1352	1657	1347	1746	1540	1708	1502	1518	1644	1489	1539	1681	[["Metabolism", "Carbohydrate Metabolism", "Ascorbate and aldarate metabolism"]]
K01707	1936	2057	2234	1269	1796	1525	1563	1843	1585	2369	2134	2496	2465	1919	2377	2506	2219	2128	[["Metabolism", "Carbohydrate Metabolism", "Ascorbate and aldarate metabolism"]]
K01706	3780	4934	4649	3325	4931	3648	4821	4906	4969	4900	4388	4802	4160	3595	4275	5074	4935	3673	[["Metabolism", "Carbohydrate Metabolism", "Ascorbate and aldarate metabolism"]]
K01705	38	20	16	11	53	50	6	52	44	18	6	21	49	18	5	8	8	76	[["Metabolism", "Amino Acid Metabolism", "Lysine biosynthesis"]]
K01704	45321	52067	50557	44389	54883	44837	48395	51411	51204	56386	50864	55744	54848	49887	52910	51299	53134	47684	[["Metabolism", "Carbohydrate Metabolism", "C5-Branched dibasic acid metabolism"], ["Metabolism", "Amino Acid Metabolism", "Valine, leucine and isoleucine biosynthesis"]]
K01703	46508	53190	51989	45339	56400	45807	49723	53174	53247	57498	51437	56431	55434	50357	53755	51977	53896	48267	[["Metabolism", "Carbohydrate Metabolism", "C5-Branched dibasic acid metabolism"], ["Metabolism", "Amino Acid Metabolism", "Valine, leucine and isoleucine biosynthesis"]]
K01702	0	0	0	0	0	0	0	0	0	0	0	0	0	0	0	0	0	0	[["Metabolism", "Amino Acid Metabolism", "Valine, leucine and isoleucine biosynthesis"]]
K14165	304	287	381	80	296	188	192	383	308	200	175	170	90	117	144	170	132	188	[["Unclassified", "Cellular Processes and Signaling", "Signal transduction mechanisms"]]
K14164	74	149	104	65	67	65	92	99	114	120	86	136	143	61	112	130	91	51	[["Genetic Information Processing", "Translation", "Aminoacyl-tRNA biosynthesis"]]
K14166	2897	3601	3243	1717	2649	1831	2519	2386	1790	4485	2730	3828	4163	2591	4049	4333	3804	2100	[["Unclassified", "Cellular Processes and Signaling", "Other transporters"]]
K14161	14546	18236	17628	12718	20118	14858	18244	18195	18522	19769	16307	19527	19454	16761	19126	18098	18215	14557	[["Genetic Information Processing", "Replication and Repair", "DNA repair and recombination proteins"]]
K14160	7547	7340	7686	5226	7870	6191	6812	7649	7706	6569	7563	7422	7292	7771	7218	7209	6569	7036	[["Genetic Information Processing", "Replication and Repair", "DNA repair and recombination proteins"]]
K14162	16360	19937	19085	13537	21213	15716	19165	19486	19690	21601	18000	21365	20535	18279	20437	19813	19858	15695	[["Genetic Information Processing", "Replication and Repair", "DNA repair and recombination proteins"]]
K05396	4031	4009	4348	4029	3857	3175	2937	4373	3939	3893	3761	3376	3371	3294	3773	3571	3464	3689	[["Metabolism", "Amino Acid Metabolism", "Cysteine and methionine metabolism"]]
K03709	10916	13578	12429	9250	12773	10166	12517	12592	12394	16088	12013	14264	12489	11634	13256	13155	14567	10137	[["Genetic Information Processing", "Transcription", "Transcription factors"]]
K03708	200	223	157	247	185	176	93	135	86	251	268	172	336	467	209	226	214	454	[["Genetic Information Processing", "Transcription", "Transcription factors"]]
K08160	92	86	150	202	57	78	36	48	60	187	166	44	61	131	74	78	79	330	[["Environmental Information Processing", "Membrane Transport", "Transporters"]]
K03701	36176	42624	40259	34953	45301	39314	43178	44693	45847	46339	38839	43465	40089	39120	39731	39763	43536	36401	[["Genetic Information Processing", "Replication and Repair", "Nucleotide excision repair"], ["Genetic Information Processing", "Replication and Repair", "DNA repair and recombination proteins"]]
K03700	422	300	167	1130	460	533	189	194	266	527	897	213	358	872	395	751	429	915	[["Genetic Information Processing", "Replication and Repair", "DNA repair and recombination proteins"]]
K03703	22029	25100	23640	21054	25997	21945	23122	24612	24381	26736	23937	25793	25520	24100	24962	24399	25540	22466	[["Genetic Information Processing", "Replication and Repair", "Nucleotide excision repair"], ["Genetic Information Processing", "Replication and Repair", "DNA repair and recombination proteins"]]
K03702	22012	25100	23659	21609	26045	22192	23185	24660	24401	26809	24157	25757	25631	24258	25027	24412	25511	22725	[["Genetic Information Processing", "Replication and Repair", "Nucleotide excision repair"], ["Genetic Information Processing", "Replication and Repair", "DNA repair and recombination proteins"]]
K03705	18631	22270	20709	17267	23303	17925	20910	21561	21583	23965	21111	23617	22938	21101	22348	21572	22800	18878	[["Genetic Information Processing", "Transcription", "Transcription factors"]]
K03704	63395	77573	72737	62657	82328	63869	76978	76285	76440	87991	76609	85959	84193	77540	83762	79552	80255	65532	[["Genetic Information Processing", "Transcription", "Transcription factors"]]
K03707	4409	5640	4890	3602	4067	3363	4069	4225	3456	6393	4833	5697	5143	5025	5934	4900	5782	4107	[["Metabolism", "Metabolism of Cofactors and Vitamins", "Thiamine metabolism"], ["Genetic Information Processing", "Transcription", "Transcription factors"]]
K03706	267	246	180	1021	372	317	145	168	225	385	722	196	265	863	390	528	383	770	[["Genetic Information Processing", "Transcription", "Transcription factors"]]
K06289	8	9	11	0	1	0	0	0	0	0	0	0	123	26	34	0	0	0	[["Unclassified", "Cellular Processes and Signaling", "Germination"]]
K06288	9	10	11	1	2	0	5	0	0	2	0	1	125	26	35	0	0	1	[["Unclassified", "Cellular Processes and Signaling", "Germination"]]
K06283	263	157	234	1379	110	448	189	104	131	357	848	152	268	544	293	225	223	859	[["Genetic Information Processing", "Transcription", "Transcription factors"]]
K06282	7096	9044	8630	8899	9908	7939	10497	10290	10913	10550	9507	9835	7365	7652	7917	8169	10141	6373	[["Metabolism", "Xenobiotics Biodegradation and Metabolism", "Nitrotoluene degradation"]]
K06281	6548	8189	7917	8573	9178	7450	9691	9357	10053	10032	8867	8984	6882	7102	7318	7211	9418	6025	[["Metabolism", "Xenobiotics Biodegradation and Metabolism", "Nitrotoluene degradation"]]
K06287	29673	33207	32413	27648	35967	29477	30860	33458	32931	34366	32279	34451	36569	32738	34421	32445	32482	30667	[["Unclassified", "Cellular Processes and Signaling", "Cell division"]]
K06286	178	124	73	102	95	164	52	58	36	64	85	85	232	248	155	215	86	287	[["Genetic Information Processing", "Replication and Repair", "Chromosome"]]
K06285	46	49	43	95	35	43	8	7	27	31	73	39	159	57	58	35	27	65	[["Genetic Information Processing", "Transcription", "Transcription factors"]]
K06284	274	155	220	821	162	376	234	67	137	447	587	169	534	617	332	201	262	411	[["Genetic Information Processing", "Transcription", "Transcription factors"]]
K08161	319	165	76	1782	160	355	119	75	95	414	983	107	257	456	192	233	210	771	[["Environmental Information Processing", "Membrane Transport", "Transporters"]]
K07540	14	37	40	24	11	34	1	11	11	7	3	16	20	8	26	33	42	5	[["Metabolism", "Xenobiotics Biodegradation and Metabolism", "Toluene degradation"]]
K06438	280	163	152	1110	359	375	143	109	197	350	881	155	269	759	282	430	344	684	[["Unclassified", "Cellular Processes and Signaling", "Sporulation"]]
K06869	0	0	0	0	0	0	0	0	0	0	0	0	0	0	0	0	0	0	[["Unclassified", "Poorly Characterized", "General function prediction only"]]
K06868	0	0	0	0	0	0	0	0	0	0	0	0	0	0	0	0	0	0	[["Genetic Information Processing", "Translation", "Aminoacyl-tRNA biosynthesis"]]
K06867	7873	8450	8685	7598	10856	7910	7123	8101	7427	8721	9094	9678	13248	7889	9086	10055	10081	8946	[["Unclassified", "Poorly Characterized", "General function prediction only"]]
K06866	93	75	47	1567	57	70	28	27	58	183	843	33	81	245	88	62	88	259	[["Unclassified", "Poorly Characterized", "General function prediction only"]]
K06865	0	0	0	0	0	0	0	0	0	0	0	0	0	0	0	0	0	0	[["Unclassified", "Poorly Characterized", "General function prediction only"]]
K06864	5241	7521	6685	6728	8373	6790	8825	8477	9393	9097	7027	8050	5779	6959	6980	6515	7335	5311	[["Unclassified", "Poorly Characterized", "General function prediction only"]]
K06863	0	0	0	0	0	0	0	0	0	0	0	0	0	0	0	0	0	0	[["Metabolism", "Nucleotide Metabolism", "Purine metabolism"]]
K06862	6	12	8	14	2	2	14	8	8	24	7	12	4	6	10	1	7	4	[["Metabolism", "Energy Metabolism", "Methane metabolism"]]
K06861	16550	18778	18020	16872	21260	18471	18929	20259	20407	19500	18542	19955	19704	18443	18341	17982	19343	17420	[["Environmental Information Processing", "Membrane Transport", "ABC transporters"], ["Environmental Information Processing", "Membrane Transport", "Transporters"]]
K06860	3671	4234	4067	2168	2892	2218	2859	3121	2487	5205	3421	4297	3801	3474	4480	3539	4151	3209	[["Unclassified", "Poorly Characterized", "General function prediction only"]]
K12659	578	551	716	435	757	439	631	866	997	460	237	316	241	180	389	309	355	298	[["Metabolism", "Amino Acid Metabolism", "Arginine and proline metabolism"]]
K12658	1037	539	595	413	538	580	355	409	559	367	1246	588	776	1275	813	777	502	788	[["Metabolism", "Amino Acid Metabolism", "Arginine and proline metabolism"]]
K07547	2	11	15	4	4	15	0	4	3	0	0	5	6	4	12	2	3	2	[["Metabolism", "Xenobiotics Biodegradation and Metabolism", "Toluene degradation"]]
K07546	2	11	15	4	4	15	0	4	3	0	0	5	6	4	12	2	3	2	[["Metabolism", "Xenobiotics Biodegradation and Metabolism", "Toluene degradation"]]
K15023	673	602	620	507	715	758	552	640	572	661	499	889	453	262	207	551	1476	571	[["None"]]
K15022	40	28	12	585	18	224	1	15	20	8	338	18	32	32	24	41	39	34	[["None"]]
K15020	0	0	0	0	0	0	0	0	0	0	0	0	0	0	0	0	0	0	[["None"]]
K15024	162	88	165	1061	337	399	167	101	151	406	849	130	187	738	199	260	150	492	[["None"]]
K08700	31	6	10	0	1	1	12	8	2	53	27	1	29	56	1	26	16	318	[["Unclassified", "Metabolism", "Carbohydrate metabolism"]]
K08162	97	107	104	1914	83	173	49	65	66	208	899	37	78	255	114	88	90	383	[["Environmental Information Processing", "Membrane Transport", "Transporters"]]
K07544	2	11	15	4	4	15	0	4	3	0	0	5	6	4	12	2	4	2	[["Metabolism", "Xenobiotics Biodegradation and Metabolism", "Toluene degradation"]]
K00137	196	326	326	247	251	167	141	130	162	305	277	295	799	495	290	277	160	481	[["Metabolism", "Metabolism of Other Amino Acids", "beta-Alanine metabolism"], ["Metabolism", "Amino Acid Metabolism", "Arginine and proline metabolism"]]
K00135	36566	44571	42606	30044	42578	31347	39563	40564	39386	48549	39533	46788	46312	41647	46955	43032	43235	37427	[["Metabolism", "Carbohydrate Metabolism", "Butanoate metabolism"], ["Metabolism", "Amino Acid Metabolism", "Alanine, aspartate and glutamate metabolism"], ["Metabolism", "Amino Acid Metabolism", "Tyrosine metabolism"]]
K00134	25291	28754	26872	24944	28875	24632	25177	27424	26992	29973	27925	29080	28329	27213	28213	27757	29634	25990	[["Metabolism", "Carbohydrate Metabolism", "Glycolysis / Gluconeogenesis"], ["Human Diseases", "Neurodegenerative Diseases", "Alzheimer's disease"]]
K00133	27017	32351	30106	28288	34137	28194	32255	32588	33214	35741	31262	33430	32034	30454	31947	31459	32850	27304	[["Metabolism", "Amino Acid Metabolism", "Cysteine and methionine metabolism"], ["Metabolism", "Amino Acid Metabolism", "Lysine biosynthesis"], ["Metabolism", "Amino Acid Metabolism", "Glycine, serine and threonine metabolism"]]
K00132	246	208	264	101	175	202	94	226	192	199	208	191	161	108	129	292	232	153	[["Metabolism", "Xenobiotics Biodegradation and Metabolism", "Xylene degradation"], ["Metabolism", "Xenobiotics Biodegradation and Metabolism", "Dioxin degradation"], ["Metabolism", "Carbohydrate Metabolism", "Pyruvate metabolism"], ["Metabolism", "Carbohydrate Metabolism", "Butanoate metabolism"], ["Metabolism", "Xenobiotics Biodegradation and Metabolism", "Benzoate degradation"]]
K00131	2253	3028	2641	2044	3067	2176	3152	2741	3045	2741	2464	2689	2369	2089	2288	2717	2695	1892	[["Metabolism", "Carbohydrate Metabolism", "Glycolysis / Gluconeogenesis"]]
K00130	19182	23322	22420	14703	18154	13349	16724	17831	15759	25750	20565	23977	22681	19660	25300	23021	22152	17655	[["Metabolism", "Amino Acid Metabolism", "Glycine, serine and threonine metabolism"]]
K00139	0	0	0	0	0	0	0	0	0	0	0	0	0	0	0	0	0	0	[["Metabolism", "Carbohydrate Metabolism", "Butanoate metabolism"], ["Metabolism", "Amino Acid Metabolism", "Alanine, aspartate and glutamate metabolism"]]
K00138	2	4	3	118	4	18	2	0	0	51	29	0	1	6	0	2	4	35	[["Unclassified", "Metabolism", "Energy metabolism"]]
K00429	3113	4344	3686	3403	4354	3466	4176	3998	4223	4527	4467	4293	3618	4080	4685	3923	4225	3110	[["Metabolism", "Amino Acid Metabolism", "Tryptophan metabolism"], ["Metabolism", "Energy Metabolism", "Methane metabolism"]]
K00428	18814	21554	22382	17477	25781	19984	22704	25172	25945	22550	18952	22069	22084	18766	21094	19931	21626	19152	[["Unclassified", "Cellular Processes and Signaling", "Inorganic ion transport and metabolism"]]
K00421	739	669	686	558	768	811	649	780	733	745	546	966	519	290	272	598	1556	612	[["Unclassified", "Metabolism", "Others"]]
K00423	954	974	942	537	981	766	679	956	732	842	768	1068	781	830	1050	832	757	576	[["Metabolism", "Carbohydrate Metabolism", "Ascorbate and aldarate metabolism"]]
K00425	22036	25384	24306	22287	26977	22226	23499	23936	23504	28397	25544	27571	29899	24975	26445	26609	27634	22671	[["Metabolism", "Energy Metabolism", "Oxidative phosphorylation"]]
K00427	121	160	227	216	103	87	115	116	114	214	141	78	46	153	60	62	97	188	[["Unclassified", "Cellular Processes and Signaling", "Other ion-coupled transporters"]]
K00426	21016	23963	23153	21496	26036	21585	22408	22908	22564	27154	24441	26504	28463	24323	25538	24985	26091	21959	[["Metabolism", "Energy Metabolism", "Oxidative phosphorylation"]]
K14292	0	0	0	0	0	0	0	0	0	0	0	0	0	0	0	0	0	0	[["None"]]
K14379	0	0	0	0	0	0	0	0	0	0	0	0	0	0	0	0	0	0	[["None"]]
K14370	2	3	2	0	1	1	2	0	2	0	2	4	2	3	3	0	4	0	[["Metabolism", "Metabolism of Terpenoids and Polyketides", "Biosynthesis of 12-, 14- and 16-membered macrolides"]]
K14371	48	112	90	34	40	43	35	24	30	75	49	67	32	36	70	112	50	42	[["Metabolism", "Metabolism of Terpenoids and Polyketides", "Biosynthesis of 12-, 14- and 16-membered macrolides"]]
K14372	59	16	22	20	21	13	8	8	9	71	58	75	32	33	67	66	85	12	[["Metabolism", "Metabolism of Terpenoids and Polyketides", "Biosynthesis of 12-, 14- and 16-membered macrolides"]]
K14373	59	16	22	20	21	13	8	8	9	71	58	75	32	33	67	66	85	12	[["Metabolism", "Metabolism of Terpenoids and Polyketides", "Biosynthesis of 12-, 14- and 16-membered macrolides"]]
K14374	185	46	68	37	29	59	12	26	11	102	81	85	41	40	78	86	92	34	[["Metabolism", "Metabolism of Terpenoids and Polyketides", "Biosynthesis of 12-, 14- and 16-membered macrolides"]]
K14375	304	480	293	214	248	168	399	273	217	329	403	355	542	210	256	687	423	153	[["Metabolism", "Metabolism of Terpenoids and Polyketides", "Biosynthesis of 12-, 14- and 16-membered macrolides"]]
K09845	395	392	575	181	321	221	308	447	393	262	246	234	180	228	222	203	209	209	[["Metabolism", "Metabolism of Terpenoids and Polyketides", "Carotenoid biosynthesis"]]
K14082	0	0	0	0	0	0	0	0	0	0	0	0	0	0	0	0	0	0	[["Metabolism", "Energy Metabolism", "Methane metabolism"]]
K14083	1579	2003	1987	1106	1639	1225	1466	1823	1495	1616	1607	2134	1951	2134	1741	1630	1490	1710	[["Metabolism", "Energy Metabolism", "Methane metabolism"]]
K14080	0	2	2	0	0	4	2	0	2	0	0	3	1	0	3	0	0	0	[["Metabolism", "Energy Metabolism", "Methane metabolism"]]
K14081	0	2	1	0	0	5	0	0	1	0	0	2	0	0	0	0	0	0	[["Metabolism", "Energy Metabolism", "Methane metabolism"]]
K14086	10	35	60	347	26	102	21	38	17	26	64	7	2	41	27	33	14	176	[["Metabolism", "Energy Metabolism", "Methane metabolism"]]
K14087	10	39	60	405	42	133	41	46	17	26	108	7	2	42	49	34	14	184	[["Metabolism", "Energy Metabolism", "Methane metabolism"]]
K14084	12	3	7	120	23	19	0	0	1	3	50	3	1	2	2	2	2	49	[["Metabolism", "Energy Metabolism", "Methane metabolism"]]
K14088	10	40	60	405	43	133	41	46	17	27	108	7	2	42	49	34	14	221	[["Metabolism", "Energy Metabolism", "Methane metabolism"]]
K14089	38	69	61	406	74	115	41	62	29	27	108	22	51	81	68	40	35	184	[["Metabolism", "Energy Metabolism", "Methane metabolism"]]
K01552	6474	7288	7233	5238	6276	5570	5778	6384	5888	8061	7073	7192	6527	6930	7063	8305	7347	6897	[["Unclassified", "Metabolism", "Others"]]
K01551	6067	7667	6933	4414	6510	4841	6336	6768	6507	8219	5873	7654	6006	5663	7161	6595	7323	5258	[["Unclassified", "Cellular Processes and Signaling", "Other transporters"]]
K01556	10662	13621	12892	9387	15011	10614	13851	13633	14549	15202	12525	14656	14972	12458	13071	13579	13180	11307	[["Metabolism", "Amino Acid Metabolism", "Tryptophan metabolism"]]
K01557	87	30	54	23	44	32	11	21	18	65	42	39	67	77	25	37	36	111	[["Metabolism", "Amino Acid Metabolism", "Tyrosine metabolism"]]
K01554	222	259	250	1531	171	172	114	93	126	321	1030	215	206	317	249	432	209	324	[["Unclassified", "Metabolism", "Others"]]
K01555	8276	11613	10625	7533	11368	8341	11779	11023	11810	12941	10165	12304	10880	10021	10770	11030	11144	9671	[["Metabolism", "Amino Acid Metabolism", "Tyrosine metabolism"], ["Metabolism", "Xenobiotics Biodegradation and Metabolism", "Styrene degradation"]]
K04708	40	22	20	8	24	20	11	16	0	10	18	34	16	8	20	52	17	4	[["Metabolism", "Lipid Metabolism", "Sphingolipid metabolism"]]
K03955	0	0	0	0	0	0	0	0	0	0	0	0	0	0	0	0	0	0	[["Human Diseases", "Neurodegenerative Diseases", "Huntington's disease"], ["Metabolism", "Energy Metabolism", "Oxidative phosphorylation"], ["Human Diseases", "Neurodegenerative Diseases", "Parkinson's disease"], ["Human Diseases", "Neurodegenerative Diseases", "Alzheimer's disease"]]
K13689	0	12	0	0	0	0	0	0	0	0	0	0	0	12	0	0	0	1	[["Metabolism", "Glycan Biosynthesis and Metabolism", "Glycosyltransferases"]]
K13688	404	453	515	244	525	414	265	419	403	377	411	435	601	660	554	472	331	493	[["Metabolism", "Glycan Biosynthesis and Metabolism", "Glycosyltransferases"]]
K13683	3	5	33	118	11	19	14	0	1	51	29	9	2	6	0	33	19	58	[["Metabolism", "Glycan Biosynthesis and Metabolism", "Glycosyltransferases"]]
K13685	1233	1094	1023	1192	1156	1271	981	1033	1049	1144	1084	1317	1159	866	685	1136	1940	1432	[["Metabolism", "Glycan Biosynthesis and Metabolism", "Glycosyltransferases"]]
K13684	2	5	4	118	4	18	2	0	1	51	29	0	1	6	0	2	4	35	[["Metabolism", "Glycan Biosynthesis and Metabolism", "Glycosyltransferases"]]
K13687	84	92	101	98	104	50	76	76	97	390	308	126	155	217	182	223	172	208	[["Metabolism", "Glycan Biosynthesis and Metabolism", "Glycosyltransferases"]]
K13686	74	98	83	86	78	51	72	106	66	123	284	116	140	194	158	211	126	162	[["Metabolism", "Glycan Biosynthesis and Metabolism", "Glycosyltransferases"]]
K14159	46	3	11	9	5	4	12	20	9	2	8	0	3	27	10	4	7	113	[["Metabolism", "Nucleotide Metabolism", "Pyrimidine metabolism"], ["Genetic Information Processing", "Replication and Repair", "DNA repair and recombination proteins"], ["Metabolism", "Nucleotide Metabolism", "Purine metabolism"], ["Genetic Information Processing", "Replication and Repair", "Mismatch repair"], ["Genetic Information Processing", "Replication and Repair", "Homologous recombination…
K02399	1776	1741	1928	2674	2112	1425	1497	1827	1925	1575	2291	1576	2510	1568	2052	1767	1928	2019	[["Cellular Processes", "Cell Motility", "Bacterial motility proteins"], ["Cellular Processes", "Cell Motility", "Flagellar assembly"]]
K02398	8000	9972	9679	9667	12534	9677	11077	11081	11656	11524	10621	11606	11233	8989	9549	9893	11848	8651	[["Cellular Processes", "Cell Motility", "Bacterial motility proteins"], ["Cellular Processes", "Cell Motility", "Flagellar assembly"]]
K02395	6364	8061	7965	8435	9845	7276	8418	8414	9083	9282	9593	9351	10085	8936	8184	8222	8515	8747	[["Cellular Processes", "Cell Motility", "Bacterial motility proteins"]]
K02394	13315	16227	15377	14251	18626	14396	16652	17119	17579	16674	17034	17906	16863	16277	15871	15388	16763	13949	[["Cellular Processes", "Cell Motility", "Bacterial motility proteins"], ["Cellular Processes", "Cell Motility", "Flagellar assembly"]]
K02397	14594	17559	16573	14672	19327	14874	17421	17564	17766	19137	16985	19483	18611	16651	18060	16618	18483	15117	[["Cellular Processes", "Cell Motility", "Bacterial motility proteins"], ["Cellular Processes", "Cell Motility", "Flagellar assembly"]]
K02396	16572	19731	18752	17264	21473	16808	19355	19922	19833	21435	19947	21829	20435	19341	20479	18824	20761	16909	[["Cellular Processes", "Cell Motility", "Bacterial motility proteins"], ["Cellular Processes", "Cell Motility", "Flagellar assembly"]]
K02391	10137	11541	11688	10473	14212	10927	12233	12427	12693	13149	12815	13751	14147	13015	13268	12118	11870	11511	[["Cellular Processes", "Cell Motility", "Bacterial motility proteins"], ["Cellular Processes", "Cell Motility", "Flagellar assembly"]]
K02390	16709	20424	18924	17883	21654	17047	19698	20286	20072	21571	21098	22034	20813	20469	20858	18959	20892	17212	[["Cellular Processes", "Cell Motility", "Bacterial motility proteins"], ["Cellular Processes", "Cell Motility", "Flagellar assembly"]]
K02393	13838	16291	15425	14277	18656	14426	16682	17150	17598	16705	17095	17949	16914	16285	15894	15446	16775	14053	[["Cellular Processes", "Cell Motility", "Bacterial motility proteins"], ["Cellular Processes", "Cell Motility", "Flagellar assembly"]]
K02392	19376	22984	21451	21220	25086	20281	22472	23447	23715	23799	24067	24497	22749	22381	22110	21466	24353	19713	[["Cellular Processes", "Cell Motility", "Bacterial motility proteins"], ["Cellular Processes", "Cell Motility", "Flagellar assembly"]]
K13533	9	11	12	1	1	2	2	0	0	2	1	2	127	27	37	1	4	0	[["Metabolism", "Enzyme Families", "Protein kinases"], ["Environmental Information Processing", "Signal Transduction", "Two-component system"]]
K13532	9	9	11	0	1	1	2	1	0	1	0	1	126	27	35	0	3	0	[["Metabolism", "Enzyme Families", "Protein kinases"], ["Environmental Information Processing", "Signal Transduction", "Two-component system"]]
K13531	404	445	476	242	369	279	403	521	382	380	246	273	312	174	202	397	415	234	[["Genetic Information Processing", "Replication and Repair", "DNA repair and recombination proteins"]]
K13530	13	12	20	19	13	9	5	2	2	10	13	14	133	32	39	7	19	21	[["Genetic Information Processing", "Transcription", "Transcription factors"], ["Genetic Information Processing", "Replication and Repair", "DNA repair and recombination proteins"]]
K01550	0	0	1	0	0	0	0	1	0	2	0	0	0	0	0	0	0	0	[["Unclassified", "Metabolism", "Energy metabolism"]]
K05658	0	0	0	0	0	0	0	0	0	0	0	0	0	0	0	0	0	0	[["Organismal Systems", "Digestive System", "Bile secretion"], ["Environmental Information Processing", "Membrane Transport", "ABC transporters"], ["Environmental Information Processing", "Signaling Molecules and Interaction", "Cellular antigens"], ["Environmental Information Processing", "Membrane Transport", "Transporters"]]
K14054	963	997	1136	848	1143	1074	754	1400	1160	1041	639	835	1104	789	828	1050	1078	1248	[["Unclassified", "Metabolism", "Amino acid metabolism"]]
K02601	22158	25176	23756	21933	26131	22369	23280	24700	24472	27033	24393	25910	25787	24474	25134	24482	25564	23075	[["Genetic Information Processing", "Translation", "Ribosome Biogenesis"], ["Genetic Information Processing", "Transcription", "Transcription machinery"]]
K02970	17693	19753	19152	19100	22502	19645	19979	21322	21747	21007	20167	20686	20270	20172	19255	19193	20359	19664	[["Genetic Information Processing", "Translation", "Ribosome"]]
K05378	0	0	0	0	0	0	0	0	0	0	0	0	0	0	0	0	0	0	[["Metabolism", "Energy Metabolism", "Photosynthesis proteins"], ["Metabolism", "Energy Metabolism", "Photosynthesis - antenna proteins"]]
K12339	11578	14163	13498	10736	14393	10958	14231	14449	14699	16312	12854	14696	12240	11144	13308	13193	15071	10655	[["Metabolism", "Amino Acid Metabolism", "Cysteine and methionine metabolism"], ["Metabolism", "Energy Metabolism", "Sulfur metabolism"]]
K14060	752	238	386	1524	179	195	102	156	185	155	1616	199	236	781	278	287	196	478	[["Unclassified", "Genetic Information Processing", "Replication, recombination and repair proteins"]]
K11687	0	0	0	0	0	0	0	0	0	0	0	0	0	0	0	0	0	0	[["Unclassified", "Genetic Information Processing", "Protein folding and associated processing"]]
K11686	13	16	12	4	4	3	6	2	3	10	5	5	132	30	43	8	15	6	[["Genetic Information Processing", "Replication and Repair", "Chromosome"]]
K11685	3	22	6	150	9	18	10	1	10	152	47	1	8	86	14	2	25	101	[["Genetic Information Processing", "Replication and Repair", "Chromosome"]]
K11689	2613	2626	3006	2501	2457	2086	2582	2927	2699	2596	2743	2718	2309	2316	2454	2472	2693	2389	[["Environmental Information Processing", "Signal Transduction", "Two-component system"]]
K11688	2590	2592	3109	2596	2494	2102	2544	2906	2664	2652	2847	2714	2378	2362	2519	2494	2734	2531	[["Environmental Information Processing", "Signal Transduction", "Two-component system"]]
K08939	309	429	786	191	194	192	291	242	266	316	325	351	216	172	279	235	327	199	[["Metabolism", "Energy Metabolism", "Photosynthesis proteins"]]
K03048	187	138	87	152	109	192	72	69	52	96	141	98	276	268	198	233	129	342	[["Metabolism", "Nucleotide Metabolism", "Pyrimidine metabolism"], ["Genetic Information Processing", "Transcription", "Transcription machinery"], ["Genetic Information Processing", "Replication and Repair", "DNA repair and recombination proteins"], ["Metabolism", "Nucleotide Metabolism", "Purine metabolism"], ["Genetic Information Processing", "Transcription", "RNA polymerase"]]
K03049	0	0	0	0	0	0	0	0	0	0	0	0	0	0	0	0	0	0	[["Metabolism", "Nucleotide Metabolism", "Pyrimidine metabolism"], ["Genetic Information Processing", "Transcription", "Transcription machinery"], ["Metabolism", "Nucleotide Metabolism", "Purine metabolism"], ["Genetic Information Processing", "Transcription", "RNA polymerase"]]
K13821	18248	19831	18907	17387	21410	16740	16079	18247	17002	17955	20399	20645	23548	20412	21886	19178	19835	18315	[["Metabolism", "Amino Acid Metabolism", "Alanine, aspartate and glutamate metabolism"], ["Metabolism", "Amino Acid Metabolism", "Arginine and proline metabolism"]]
K13820	2	1	3	1	2	2	1	2	0	3	2	0	3	72	3	3	5	2	[["Environmental Information Processing", "Membrane Transport", "Secretion system"], ["Cellular Processes", "Cell Motility", "Bacterial motility proteins"], ["Cellular Processes", "Cell Motility", "Flagellar assembly"]]
K03042	0	0	0	0	0	0	0	0	0	0	0	0	0	0	0	0	0	0	[["Metabolism", "Nucleotide Metabolism", "Pyrimidine metabolism"], ["Genetic Information Processing", "Transcription", "Transcription machinery"], ["Metabolism", "Nucleotide Metabolism", "Purine metabolism"], ["Genetic Information Processing", "Transcription", "RNA polymerase"]]
K03043	21939	24601	23626	21105	25993	22037	23021	24588	24305	26617	23590	25643	25486	23624	24749	24256	25339	22544	[["Metabolism", "Nucleotide Metabolism", "Pyrimidine metabolism"], ["Genetic Information Processing", "Transcription", "Transcription machinery"], ["Genetic Information Processing", "Replication and Repair", "DNA repair and recombination proteins"], ["Metabolism", "Nucleotide Metabolism", "Purine metabolism"], ["Genetic Information Processing", "Transcription", "RNA polymerase"]]
K03040	22004	25053	23682	21548	25988	22165	23218	24608	24382	26737	24123	25813	25675	24305	25077	24283	25529	22669	[["Metabolism", "Nucleotide Metabolism", "Pyrimidine metabolism"], ["Genetic Information Processing", "Transcription", "Transcription machinery"], ["Genetic Information Processing", "Replication and Repair", "DNA repair and recombination proteins"], ["Metabolism", "Nucleotide Metabolism", "Purine metabolism"], ["Genetic Information Processing", "Transcription", "RNA polymerase"]]
K03041	0	0	0	0	0	0	0	0	0	0	0	0	0	0	0	0	0	0	[["Metabolism", "Nucleotide Metabolism", "Pyrimidine metabolism"], ["Genetic Information Processing", "Transcription", "Transcription machinery"], ["Metabolism", "Nucleotide Metabolism", "Purine metabolism"], ["Genetic Information Processing", "Transcription", "RNA polymerase"]]
K03046	22920	25591	24779	21825	27111	23148	23794	25986	25472	27569	24224	26494	26617	24344	25565	25340	26416	23994	[["Metabolism", "Nucleotide Metabolism", "Pyrimidine metabolism"], ["Genetic Information Processing", "Transcription", "Transcription machinery"], ["Genetic Information Processing", "Replication and Repair", "DNA repair and recombination proteins"], ["Metabolism", "Nucleotide Metabolism", "Purine metabolism"], ["Genetic Information Processing", "Transcription", "RNA polymerase"]]
K03047	0	0	0	0	0	0	0	0	0	0	0	0	0	0	0	0	0	0	[["Metabolism", "Nucleotide Metabolism", "Pyrimidine metabolism"], ["Genetic Information Processing", "Transcription", "Transcription machinery"], ["Metabolism", "Nucleotide Metabolism", "Purine metabolism"], ["Genetic Information Processing", "Transcription", "RNA polymerase"]]
K03044	0	0	0	0	0	0	0	0	0	0	0	0	0	0	0	0	0	0	[["Metabolism", "Nucleotide Metabolism", "Pyrimidine metabolism"], ["Genetic Information Processing", "Transcription", "Transcription machinery"], ["Metabolism", "Nucleotide Metabolism", "Purine metabolism"], ["Genetic Information Processing", "Transcription", "RNA polymerase"]]
K03045	0	0	0	0	0	0	0	0	0	0	0	0	0	0	0	0	0	0	[["Metabolism", "Nucleotide Metabolism", "Pyrimidine metabolism"], ["Genetic Information Processing", "Transcription", "Transcription machinery"], ["Metabolism", "Nucleotide Metabolism", "Purine metabolism"], ["Genetic Information Processing", "Transcription", "RNA polymerase"]]
K00348	1381	860	885	3646	866	2278	833	702	846	1399	2177	769	1133	1941	1408	1058	1004	1675	[["Unclassified", "Metabolism", "Energy metabolism"]]
K09847	43	14	36	17	40	12	9	19	24	26	73	6	3	22	3	17	14	77	[["Metabolism", "Metabolism of Terpenoids and Polyketides", "Carotenoid biosynthesis"]]
K00692	1685	2337	2361	1592	2240	1499	2064	2136	2428	2389	2012	2695	2589	2278	2059	2064	1848	2804	[["Metabolism", "Glycan Biosynthesis and Metabolism", "Glycosyltransferases"], ["Metabolism", "Carbohydrate Metabolism", "Starch and sucrose metabolism"], ["Environmental Information Processing", "Signal Transduction", "Two-component system"]]
K00638	2782	2717	3020	4940	2920	2978	2187	3122	2825	2955	3682	2734	3103	3411	2647	3255	2854	3229	[["Unclassified", "Metabolism", "Others"]]
K00639	12729	14792	14379	13562	17164	14692	14989	15204	16249	16650	14837	16284	16939	15210	14584	15106	16022	14112	[["Metabolism", "Amino Acid Metabolism", "Amino acid related enzymes"], ["Metabolism", "Amino Acid Metabolism", "Glycine, serine and threonine metabolism"]]
K00693	117	95	79	40	78	68	95	103	109	19	105	27	30	18	32	49	31	110	[["Metabolism", "Glycan Biosynthesis and Metabolism", "Glycosyltransferases"], ["Metabolism", "Carbohydrate Metabolism", "Starch and sucrose metabolism"], ["Organismal Systems", "Endocrine System", "Insulin signaling pathway"]]
K00634	1475	1420	1289	2846	1244	2815	1261	1396	1424	1460	1760	1304	1290	1982	1321	1311	1476	1652	[["Metabolism", "Carbohydrate Metabolism", "Butanoate metabolism"]]
K00635	3899	5282	4362	3150	4736	2898	4263	4168	4294	5242	5710	4796	4872	5066	6005	4770	5118	3556	[["Metabolism", "Lipid Metabolism", "Glycerolipid metabolism"]]
K00630	0	0	0	0	0	0	0	0	0	0	0	0	0	0	0	0	0	0	[["Metabolism", "Lipid Metabolism", "Glycerophospholipid metabolism"], ["Metabolism", "Lipid Metabolism", "Glycerolipid metabolism"], ["Metabolism", "Lipid Metabolism", "Lipid biosynthesis proteins"]]
K00631	2166	2279	2466	3637	3940	2649	2036	2433	2555	2564	3275	2778	4505	2674	3140	2784	2918	2756	[["Metabolism", "Lipid Metabolism", "Glycerophospholipid metabolism"], ["Metabolism", "Lipid Metabolism", "Glycerolipid metabolism"], ["Metabolism", "Lipid Metabolism", "Lipid biosynthesis proteins"]]
K00632	23993	28362	27369	21825	28028	21079	25025	27060	26138	30721	26865	29254	28643	24498	28545	28045	27959	22722	[["Metabolism", "Xenobiotics Biodegradation and Metabolism", "Ethylbenzene degradation"], ["Metabolism", "Metabolism of Terpenoids and Polyketides", "Geraniol degradation"], ["Metabolism", "Lipid Metabolism", "Fatty acid metabolism"], ["Metabolism", "Lipid Metabolism", "alpha-Linolenic acid metabolism"], ["Metabolism", "Xenobiotics Biodegradation and Metabolism", "Benzoate degradation"], ["Metabo…
K00633	500	586	556	2287	341	672	385	384	347	495	1351	457	685	686	454	795	456	964	[["Unclassified", "Metabolism", "Others"]]
K00691	135	36	34	68	51	165	58	33	18	55	59	23	201	215	490	95	46	275	[["Metabolism", "Carbohydrate Metabolism", "Starch and sucrose metabolism"]]
K00696	21	35	44	55	66	58	18	10	14	43	53	146	155	78	57	50	49	136	[["Metabolism", "Carbohydrate Metabolism", "Starch and sucrose metabolism"]]
K00694	6309	8425	7597	8372	10934	8573	9556	8658	9310	10945	9567	10366	11124	10155	10742	9000	9614	8022	[["Metabolism", "Glycan Biosynthesis and Metabolism", "Glycosyltransferases"], ["Metabolism", "Carbohydrate Metabolism", "Starch and sucrose metabolism"]]
K00695	28	19	48	45	56	52	24	5	12	88	78	145	157	101	58	72	30	388	[["Metabolism", "Glycan Biosynthesis and Metabolism", "Glycosyltransferases"], ["Metabolism", "Carbohydrate Metabolism", "Starch and sucrose metabolism"]]
K10854	103	512	255	437	62	87	148	89	112	79	503	87	475	453	242	101	200	128	[["Unclassified", "Metabolism", "Biosynthesis and biodegradation of secondary metabolites"]]
K07811	0	2	2	37	0	0	0	0	0	1	15	0	1	1	0	0	0	74	[["Environmental Information Processing", "Signal Transduction", "Two-component system"]]
K07810	261	211	147	1627	154	375	97	107	163	296	923	146	198	329	321	156	179	292	[["Environmental Information Processing", "Signal Transduction", "Two-component system"]]
K07813	525	412	185	1272	696	622	206	263	322	1022	1158	241	297	1015	273	1047	661	1067	[["Metabolism", "Enzyme Families", "Peptidases"], ["Environmental Information Processing", "Signal Transduction", "Two-component system"]]
K07812	2219	2729	2228	2338	1788	1827	1688	2003	1662	2327	2999	2434	2070	2739	2832	2492	2302	2187	[["Unclassified", "Cellular Processes and Signaling", "Electron transfer carriers"]]
K07814	8520	10324	10236	7612	11310	9284	11527	11966	12359	11011	8727	10479	8235	8169	8333	8929	11068	8181	[["Environmental Information Processing", "Signal Transduction", "Two-component system"]]
K07816	213	138	89	118	244	199	75	73	55	187	174	139	250	590	246	322	146	334	[["Metabolism", "Nucleotide Metabolism", "Purine metabolism"]]
K00090	2149	2245	2497	1949	3589	2546	1801	2026	1983	2544	2592	2943	4594	2532	2880	3136	3059	2904	[["Metabolism", "Carbohydrate Metabolism", "Pentose phosphate pathway"]]
K00091	7588	10038	9532	7777	11686	8664	11438	11496	12728	11497	8565	10471	9264	8745	10341	9047	9655	7710	[["Metabolism", "Biosynthesis of Other Secondary Metabolites", "Flavonoid biosynthesis"]]
K00094	37	26	25	275	6	60	8	1	21	160	154	23	63	127	80	49	23	175	[["Metabolism", "Carbohydrate Metabolism", "Galactose metabolism"]]
K00096	1029	1437	1122	1137	1089	742	1145	890	874	1345	1206	1132	1540	856	1019	1957	1656	935	[["Unclassified", "Metabolism", "Energy metabolism"]]
K00097	14710	14868	15097	14441	16431	14411	13076	15234	14814	14307	15532	15346	16335	14963	14945	14564	15114	15397	[["Metabolism", "Metabolism of Cofactors and Vitamins", "Vitamin B6 metabolism"]]
K00098	2169	2264	2347	1317	1895	1537	1565	1822	1555	2106	1922	2174	2099	2230	2535	2257	1954	1738	[["Unclassified", "Metabolism", "Amino acid metabolism"]]
K00099	20903	24056	22531	20870	24802	21275	22234	23440	23120	25801	23483	25005	24617	23326	24122	23529	24713	21361	[["Metabolism", "Metabolism of Terpenoids and Polyketides", "Terpenoid backbone biosynthesis"]]
K10228	1814	1968	2208	1409	1972	1455	1717	1935	1890	2124	1818	1949	2319	1700	2161	1988	1792	1979	[["Environmental Information Processing", "Membrane Transport", "ABC transporters"], ["Environmental Information Processing", "Membrane Transport", "Transporters"]]
K10229	1800	1959	2184	1396	1963	1444	1709	1916	1876	2119	1800	1948	1854	1687	2130	1973	1776	2002	[["Environmental Information Processing", "Membrane Transport", "ABC transporters"], ["Environmental Information Processing", "Membrane Transport", "Transporters"]]
K12548	40	53	32	7	55	52	7	0	7	22	80	63	9	103	2	3	35	112	[["Unclassified", "Cellular Processes and Signaling", "Cell motility and secretion"]]
K10222	321	389	501	223	419	354	162	309	275	250	265	370	615	302	387	390	272	499	[["Metabolism", "Xenobiotics Biodegradation and Metabolism", "Dioxin degradation"]]
K10220	909	1085	1157	587	926	705	433	788	752	783	864	957	1111	736	1029	1129	662	1610	[["Metabolism", "Xenobiotics Biodegradation and Metabolism", "Benzoate degradation"]]
K10221	694	762	792	480	768	642	353	665	639	621	716	686	647	597	705	787	470	1120	[["Metabolism", "Xenobiotics Biodegradation and Metabolism", "Aminobenzoate degradation"], ["Metabolism", "Xenobiotics Biodegradation and Metabolism", "Benzoate degradation"]]
K10227	2096	2247	2509	1495	2140	1638	1821	2150	2128	2347	2090	2200	2409	1820	2440	2292	2040	2307	[["Environmental Information Processing", "Membrane Transport", "ABC transporters"], ["Environmental Information Processing", "Membrane Transport", "Transporters"]]
K05822	59	57	29	47	45	77	10	25	22	12	66	46	172	124	108	83	48	107	[["Metabolism", "Amino Acid Metabolism", "Lysine biosynthesis"]]
K01949	0	0	0	0	0	0	0	0	0	0	0	0	0	0	0	0	0	0	[["Unclassified", "Metabolism", "Others"]]
K01945	22109	25285	23983	21870	26386	22269	23513	25067	25018	27008	24215	25870	25689	24183	25188	24463	25727	22439	[["Metabolism", "Nucleotide Metabolism", "Purine metabolism"]]
K01947	0	1	12	0	1	0	33	2	0	61	12	11	0	233	881	0	1	0	[["Metabolism", "Metabolism of Cofactors and Vitamins", "Biotin metabolism"], ["Metabolism", "Metabolism of Cofactors and Vitamins", "Pantothenate and CoA biosynthesis"]]
K01946	0	0	0	0	0	0	0	0	0	0	0	0	0	0	0	0	0	0	[["None"]]
K01941	1635	1514	1569	1010	1710	1477	1022	1540	1390	1493	1561	1760	1739	1439	1740	1815	1410	2066	[["Metabolism", "Amino Acid Metabolism", "Arginine and proline metabolism"]]
K01940	21449	24642	23444	20591	25695	21121	22932	24406	24101	26396	23583	25687	25515	22888	24401	24407	25163	21822	[["Metabolism", "Amino Acid Metabolism", "Alanine, aspartate and glutamate metabolism"], ["Metabolism", "Amino Acid Metabolism", "Arginine and proline metabolism"]]
K06357	0	0	0	0	0	0	0	0	0	0	0	0	0	0	0	0	0	0	[["Unclassified", "Cellular Processes and Signaling", "Sporulation"]]
K07729	8595	10445	9065	13590	13492	10983	11234	10285	11032	12495	13010	11262	14058	13503	12417	11822	11173	10112	[["Genetic Information Processing", "Transcription", "Transcription factors"]]
K07728	0	0	0	0	0	0	0	0	0	0	0	0	0	0	0	0	0	0	[["Genetic Information Processing", "Transcription", "Transcription factors"]]
K07727	5147	4833	4738	6475	5479	5371	4124	4340	3992	5006	5773	4418	5812	6100	5679	6166	4604	5594	[["Genetic Information Processing", "Transcription", "Transcription factors"]]
K07726	7242	8860	8763	8889	9982	7856	9166	9496	9570	9757	9380	9586	10197	8738	9438	8608	8717	8543	[["Genetic Information Processing", "Transcription", "Transcription factors"]]
K07725	0	0	0	0	0	0	0	0	0	0	0	0	0	0	0	0	0	0	[["Genetic Information Processing", "Transcription", "Transcription factors"]]
K07724	104	86	64	1616	67	78	34	28	60	303	861	39	96	443	271	53	98	285	[["Genetic Information Processing", "Transcription", "Transcription factors"]]
K07723	54	50	49	98	47	50	9	10	28	37	82	41	163	164	93	41	34	67	[["Genetic Information Processing", "Transcription", "Transcription factors"]]
K07722	3460	3720	3483	2559	3030	2850	2986	3892	3619	3090	2958	2805	2386	2581	2940	2727	3269	2661	[["Genetic Information Processing", "Transcription", "Transcription factors"]]
K07721	7	2	2	0	0	0	0	0	0	1	0	0	0	0	0	3	0	0	[["Genetic Information Processing", "Transcription", "Transcription factors"]]
K07720	1037	837	1185	6652	1839	2168	761	711	746	1818	3922	806	939	3316	1331	1703	1108	3607	[["Environmental Information Processing", "Signal Transduction", "Two-component system"]]
K00899	738	837	694	602	488	371	301	385	322	762	777	620	972	1079	1275	882	585	658	[["Metabolism", "Amino Acid Metabolism", "Cysteine and methionine metabolism"]]
K05824	0	0	0	0	0	0	0	0	0	0	0	0	0	0	0	0	0	0	[["Metabolism", "Amino Acid Metabolism", "Lysine biosynthesis"]]
K00891	21679	24779	23400	23750	26102	21734	23088	23951	24038	27249	25900	26158	25406	25053	25328	24647	25598	22293	[["Metabolism", "Amino Acid Metabolism", "Phenylalanine, tyrosine and tryptophan biosynthesis"]]
K00892	87	71	44	1567	57	70	28	27	50	182	835	30	76	215	87	55	75	257	[["Metabolism", "Nucleotide Metabolism", "Purine metabolism"]]
K00895	3629	3851	3813	2627	3421	3348	2715	3633	3231	3926	2661	3420	3739	3622	3492	4087	4148	3103	[["Metabolism", "Carbohydrate Metabolism", "Fructose and mannose metabolism"]]
K00897	1091	750	677	466	437	381	296	337	405	683	1177	661	842	1537	834	913	522	694	[["Unclassified", "Genetic Information Processing", "Translation proteins"]]
K08151	4734	4691	4837	5330	6719	5332	4225	4825	4613	4208	5566	5476	8254	5563	6187	6062	5015	4903	[["Environmental Information Processing", "Membrane Transport", "Transporters"]]
K08153	49	63	37	37	51	53	16	38	30	27	41	61	161	128	92	95	64	82	[["Environmental Information Processing", "Membrane Transport", "Transporters"]]
K08154	132	105	77	1585	86	118	61	81	92	193	857	54	99	218	108	81	164	300	[["Environmental Information Processing", "Membrane Transport", "Transporters"]]
K02948	22012	25097	23658	21607	26041	22189	23193	24660	24400	26810	24156	25739	25630	24257	25024	24408	25517	22710	[["Genetic Information Processing", "Translation", "Ribosome"]]
K02942	0	0	0	0	0	0	0	0	0	0	0	0	0	0	0	0	0	0	[["None"]]
K02944	0	0	0	0	0	0	0	0	0	0	0	0	0	0	0	0	0	0	[["Genetic Information Processing", "Translation", "Ribosome"]]
K05665	0	0	0	0	0	0	0	0	0	0	0	0	0	0	0	2	0	0	[["None"]]
K02946	21944	25115	23719	21598	26041	22144	23183	24669	24401	26824	24163	25762	25611	24246	25083	24350	25523	22541	[["Genetic Information Processing", "Translation", "Ribosome"]]
K13793	0	0	2	10	0	0	0	0	0	0	9	0	0	1	0	0	0	9	[["Human Diseases", "Infectious Diseases", "Shigellosis"]]
K06352	1	0	0	0	0	0	2	0	0	0	0	0	1	1	1	0	0	0	[["Unclassified", "Cellular Processes and Signaling", "Sporulation"]]
K01769	14	60	44	11	16	26	2	5	6	1	14	23	5	18	55	26	34	122	[["Metabolism", "Nucleotide Metabolism", "Purine metabolism"]]
K01768	37490	42874	43685	31011	44847	35500	42040	45913	42729	46774	39337	47652	43017	40392	45826	41442	46993	37755	[["Cellular Processes", "Cell Growth and Death", "Meiosis - yeast"], ["Metabolism", "Nucleotide Metabolism", "Purine metabolism"]]
K01761	5320	5899	5950	5344	5666	3683	5442	5690	6075	5810	6059	5719	5741	5261	4894	5799	5230	5570	[["Metabolism", "Amino Acid Metabolism", "Cysteine and methionine metabolism"], ["Metabolism", "Metabolism of Other Amino Acids", "Selenocompound metabolism"]]
K01760	11404	14310	13682	11609	14759	12078	14434	14872	15288	13697	13709	14534	14056	14023	13488	13143	13274	12554	[["Metabolism", "Amino Acid Metabolism", "Cysteine and methionine metabolism"], ["Metabolism", "Energy Metabolism", "Sulfur metabolism"], ["Metabolism", "Metabolism of Other Amino Acids", "Selenocompound metabolism"], ["Metabolism", "Energy Metabolism", "Nitrogen metabolism"]]
K01762	0	0	0	0	0	0	0	0	0	0	0	0	0	0	0	0	0	0	[["Metabolism", "Amino Acid Metabolism", "Cysteine and methionine metabolism"], ["Metabolism", "Amino Acid Metabolism", "Amino acid related enzymes"]]
K09578	0	0	0	0	0	0	0	0	0	0	0	0	0	0	0	0	0	0	[["Genetic Information Processing", "Folding, Sorting and Degradation", "Chaperones and folding catalysts"], ["Organismal Systems", "Immune System", "RIG-I-like receptor signaling pathway"]]
K01766	162	121	135	1596	109	138	32	50	92	207	892	49	89	257	90	87	114	395	[["Unclassified", "Metabolism", "Amino acid metabolism"]]
K08164	122	217	212	73	141	101	127	114	86	266	111	209	264	136	185	222	132	116	[["Environmental Information Processing", "Membrane Transport", "Transporters"]]
K02493	23421	26910	25220	22450	27268	22864	24299	25745	25245	28404	25636	27293	27495	25390	26678	26773	27280	23864	[["Unclassified", "Genetic Information Processing", "Translation proteins"]]
K08166	765	572	701	378	548	380	371	429	333	740	771	717	685	602	817	1153	625	521	[["Environmental Information Processing", "Membrane Transport", "Transporters"]]
K08167	7246	8883	8088	5971	6344	4460	6208	6024	4757	10986	7900	9203	9292	6188	9084	9988	9592	5632	[["Environmental Information Processing", "Membrane Transport", "Transporters"]]
K02496	3579	3437	3828	4119	5010	3657	2970	3749	3551	3429	4332	3915	5512	3434	3885	3950	4204	4204	[["Metabolism", "Metabolism of Cofactors and Vitamins", "Porphyrin and chlorophyll metabolism"]]
K02497	44	58	34	16	40	18	10	21	21	14	26	40	153	117	66	83	42	32	[["Unclassified", "Cellular Processes and Signaling", "Membrane and intracellular structural molecules"]]
K02494	3614	3428	3867	4145	5058	3673	3025	3773	3565	3449	4364	3915	5558	3508	4301	3942	4241	4163	[["Unclassified", "Cellular Processes and Signaling", "Membrane and intracellular structural molecules"]]
K02495	32015	35389	34431	32301	37762	32066	32116	35100	34365	36762	35249	35409	37736	35636	37293	35102	34845	32989	[["Metabolism", "Metabolism of Cofactors and Vitamins", "Porphyrin and chlorophyll metabolism"]]
K02498	6504	6608	7174	6659	8723	6681	6258	7279	6708	6212	7325	7358	9227	6816	8210	7207	7121	6445	[["Unclassified", "Metabolism", "Metabolism of cofactors and vitamins"]]
K02499	903	781	732	751	874	936	690	732	727	883	780	1063	719	673	360	721	1622	1016	[["Unclassified", "Poorly Characterized", "General function prediction only"]]
K08168	5	5	7	5	36	39	16	4	16	4	1	1	3	1	3	5	12	21	[["Environmental Information Processing", "Membrane Transport", "Transporters"]]
K08169	1652	1325	1338	1393	1385	1241	1044	1238	1131	1511	1917	1399	1432	2055	1633	1603	1380	1621	[["Environmental Information Processing", "Membrane Transport", "Transporters"]]
K14415	801	824	1035	2416	1021	798	762	1090	1210	649	1847	488	485	1105	715	643	561	805	[["Unclassified", "Poorly Characterized", "Function unknown"]]
K14414	714	721	948	1929	924	593	703	958	1118	689	1680	435	816	1109	947	489	476	567	[["Genetic Information Processing", "Transcription", "Transcription factors"]]
K06881	10172	12050	11084	11025	12326	11768	12607	12384	12596	15257	11655	12816	11117	11505	11292	11883	13561	10753	[["Unclassified", "Poorly Characterized", "General function prediction only"]]
K00436	1844	1702	2034	1204	1801	1494	1658	1878	1916	1768	1584	1803	1671	1278	1267	1535	1666	1424	[["Metabolism", "Energy Metabolism", "Methane metabolism"]]
K06332	12	15	22	3	7	9	3	1	1	6	3	5	131	32	40	10	13	11	[["Unclassified", "Cellular Processes and Signaling", "Sporulation"]]
K12815	0	0	0	0	0	0	0	0	0	0	0	0	0	0	0	0	0	0	[["None"]]
K12810	0	0	0	0	0	0	0	0	0	0	0	0	0	0	0	0	0	0	[["Human Diseases", "Infectious Diseases", "Pathogenic Escherichia coli infection"]]
K06885	2956	2925	2904	1770	2668	2324	2696	3451	3342	2339	1716	2173	2036	1782	1703	2337	2499	2242	[["Unclassified", "Poorly Characterized", "General function prediction only"]]
K00437	2	2	2	4	0	1	0	1	0	11	1	5	2	71	54	3	0	12	[["Unclassified", "Metabolism", "Others"]]
K06335	9	9	11	0	1	0	2	1	0	1	0	0	125	26	35	0	1	0	[["Unclassified", "Cellular Processes and Signaling", "Sporulation"]]
K06334	292	193	317	1676	154	563	282	150	234	647	969	189	361	766	294	346	321	948	[["Unclassified", "Cellular Processes and Signaling", "Sporulation"]]
K03547	7241	7467	7740	7685	7066	6182	5739	6822	6675	8685	7105	7309	7453	6193	7361	7503	8624	7576	[["Genetic Information Processing", "Replication and Repair", "DNA repair and recombination proteins"]]
K03546	7624	7958	8131	7316	6966	6210	5803	7078	6644	9231	7304	7852	7562	6350	7435	7743	9052	7780	[["Genetic Information Processing", "Replication and Repair", "DNA repair and recombination proteins"]]
K03545	22155	25164	23752	22482	26189	22447	23234	24766	24469	27142	24713	25786	25737	24613	25135	24748	25686	23315	[["Unclassified", "Genetic Information Processing", "Protein folding and associated processing"]]
K03544	22774	25747	24453	22819	27118	22849	23923	25661	25561	27634	24941	26156	25939	24963	25523	25144	26065	23387	[["Genetic Information Processing", "Folding, Sorting and Degradation", "Chaperones and folding catalysts"], ["Cellular Processes", "Cell Growth and Death", "Cell cycle - Caulobacter"]]
K03543	24639	29701	28799	26544	34823	27365	32044	31556	33005	33583	31166	34496	33486	31442	31733	29717	31263	27863	[["Unclassified", "Cellular Processes and Signaling", "Other transporters"]]
K06888	11932	14925	13909	10723	15132	11615	14845	15144	14920	16678	13077	15819	13670	12254	14740	14171	15406	10461	[["Unclassified", "Poorly Characterized", "General function prediction only"]]
K10941	1860	1857	1950	1847	3430	2615	1623	1827	1634	2122	2095	2809	4073	2070	2308	2611	3469	2231	[["Genetic Information Processing", "Transcription", "Transcription factors"], ["Human Diseases", "Infectious Diseases", "Vibrio cholerae pathogenic cycle"]]
K03549	12631	13046	13721	9869	14851	12057	11822	13689	12850	12498	12370	14009	15398	13006	13227	13532	14070	13157	[["Unclassified", "Cellular Processes and Signaling", "Other ion-coupled transporters"]]
K03548	314	277	303	1704	263	252	160	321	301	261	973	147	146	300	132	232	311	528	[["Unclassified", "Cellular Processes and Signaling", "Other transporters"]]
K10940	0	0	0	0	0	0	0	0	0	0	0	0	0	0	0	0	0	5	[["Human Diseases", "Infectious Diseases", "Vibrio cholerae pathogenic cycle"]]
K02236	362	261	148	203	194	318	101	135	147	143	195	191	496	497	313	462	301	621	[["Environmental Information Processing", "Membrane Transport", "Secretion system"]]
K02237	12343	14215	13622	11577	14695	11074	11863	13691	13122	14423	12778	13863	14959	12126	14008	14112	14740	11942	[["Environmental Information Processing", "Membrane Transport", "Secretion system"]]
K02234	3025	3418	3709	2698	3826	3209	3279	3680	3290	2984	3284	3638	3899	3553	4064	3754	3060	2990	[["Metabolism", "Metabolism of Cofactors and Vitamins", "Porphyrin and chlorophyll metabolism"]]
K02232	13292	14572	14384	11001	13196	10692	11605	13053	12337	14713	14017	14876	13622	13186	14329	14449	14814	12714	[["Metabolism", "Metabolism of Cofactors and Vitamins", "Porphyrin and chlorophyll metabolism"]]
K02233	11948	12290	12498	10178	11417	9610	9965	11551	10745	12734	12024	12245	10986	10774	11962	12460	13005	10207	[["Metabolism", "Metabolism of Cofactors and Vitamins", "Porphyrin and chlorophyll metabolism"]]
K02230	8105	8763	8557	5609	7534	6251	6601	7598	6683	9268	7536	9184	8432	7750	9560	8884	8728	6560	[["Metabolism", "Metabolism of Cofactors and Vitamins", "Porphyrin and chlorophyll metabolism"]]
K02231	22004	22792	23324	19986	23134	19087	18278	21865	20433	23497	23923	24263	23318	22038	22708	24105	24950	21717	[["Metabolism", "Metabolism of Cofactors and Vitamins", "Porphyrin and chlorophyll metabolism"]]
K06359	9	9	11	0	1	0	2	0	0	0	0	0	125	26	35	0	0	0	[["Unclassified", "Cellular Processes and Signaling", "Sporulation"]]
K02238	22249	25318	24159	21838	26816	22543	23485	25509	24969	27323	24354	26231	26194	24609	25406	25151	26110	22740	[["Environmental Information Processing", "Membrane Transport", "Secretion system"]]
K02239	15	23	23	7	11	11	6	2	4	12	7	9	138	32	48	19	24	21	[["Environmental Information Processing", "Membrane Transport", "Secretion system"]]
K03723	23014	25607	24282	21962	26576	22658	23865	25257	24885	27383	25224	26491	26320	25423	25810	24906	26150	23024	[["Genetic Information Processing", "Replication and Repair", "Nucleotide excision repair"], ["Genetic Information Processing", "Replication and Repair", "DNA repair and recombination proteins"]]
K03722	16175	19101	18648	16103	22539	16737	18766	20174	20701	20539	18501	20299	21887	17474	18975	19128	19569	17298	[["Genetic Information Processing", "Replication and Repair", "DNA repair and recombination proteins"]]
K03721	164	127	140	1632	116	142	54	60	95	211	942	53	91	259	116	89	118	415	[["Genetic Information Processing", "Transcription", "Transcription factors"]]
K03720	149	110	79	1587	100	140	73	82	107	192	864	74	110	248	123	80	177	333	[["Genetic Information Processing", "Transcription", "Transcription factors"]]
K03727	4254	5186	4499	2484	3430	2428	3196	3201	2611	5812	4064	5037	4976	4171	5587	5264	5165	3342	[["Unclassified", "Genetic Information Processing", "Replication, recombination and repair proteins"]]
K03726	725	604	625	514	731	762	551	644	573	712	502	892	454	274	207	562	1478	572	[["Unclassified", "Genetic Information Processing", "Replication, recombination and repair proteins"]]
K03725	0	0	0	0	0	0	0	0	0	0	0	0	0	0	0	0	0	0	[["Unclassified", "Genetic Information Processing", "Replication, recombination and repair proteins"]]
K03724	20033	25340	23995	17936	27662	20731	26349	26010	27215	28812	22927	27345	25043	23380	26181	24347	24931	19031	[["Genetic Information Processing", "Replication and Repair", "DNA repair and recombination proteins"]]
K06358	0	0	0	0	0	0	0	0	0	0	0	0	0	0	0	0	0	0	[["Unclassified", "Cellular Processes and Signaling", "Sporulation"]]
K12673	40	9	15	6	3	15	1	6	0	10	8	3	3	2	4	7	2	8	[["Metabolism", "Biosynthesis of Other Secondary Metabolites", "Clavulanic acid biosynthesis"]]
K12679	0	0	0	0	0	0	0	0	0	0	0	0	0	0	0	0	0	0	[["Environmental Information Processing", "Membrane Transport", "Secretion system"], ["Human Diseases", "Infectious Diseases", "Shigellosis"]]
K12678	0	0	0	26	0	0	0	0	0	1	6	0	0	1	0	0	0	0	[["Environmental Information Processing", "Membrane Transport", "Secretion system"]]
K06410	381	348	424	892	257	495	246	162	233	530	692	264	440	543	309	499	345	499	[["Unclassified", "Cellular Processes and Signaling", "Sporulation"]]
K11898	162	170	198	247	237	358	128	227	261	227	363	337	249	292	326	429	263	218	[["Environmental Information Processing", "Membrane Transport", "Secretion system"]]
K11899	18	20	29	12	17	12	9	19	14	8	19	15	50	43	20	50	17	20	[["Environmental Information Processing", "Membrane Transport", "Secretion system"]]
K11896	2810	2810	3254	4693	2835	2214	2189	2913	3029	2822	3978	2855	2381	2587	2587	2749	2555	2995	[["Environmental Information Processing", "Membrane Transport", "Secretion system"]]
K11897	805	850	993	565	763	754	350	661	710	713	986	984	848	884	952	1128	750	1025	[["Environmental Information Processing", "Membrane Transport", "Secretion system"]]
K11894	219	329	372	1539	262	201	130	167	204	165	1017	293	448	509	259	351	219	456	[["Environmental Information Processing", "Membrane Transport", "Secretion system"]]
K11895	1927	1936	2273	2686	1735	1510	1204	1821	1695	1996	2626	2036	1625	2013	1913	1989	1643	2141	[["Environmental Information Processing", "Membrane Transport", "Secretion system"]]
K11892	3095	3119	3682	3422	3105	2371	2439	3306	3353	3001	3337	3096	2504	2622	2721	3005	2766	3096	[["Environmental Information Processing", "Membrane Transport", "Secretion system"], ["Environmental Information Processing", "Membrane Transport", "Bacterial secretion system"]]
K11893	5625	6530	6804	6116	7315	5829	6509	7617	7851	6958	6339	6774	5690	5256	5895	6343	6472	5687	[["Environmental Information Processing", "Membrane Transport", "Secretion system"]]
K11890	1131	1168	1480	657	971	772	828	1246	998	1031	1053	1113	838	889	891	1015	897	951	[["Environmental Information Processing", "Membrane Transport", "Secretion system"]]
K11891	3267	3317	3821	3347	2963	2406	2442	3315	3078	3238	3630	3495	2700	2978	2883	3142	2900	3136	[["Environmental Information Processing", "Membrane Transport", "Secretion system"], ["Environmental Information Processing", "Membrane Transport", "Bacterial secretion system"]]
K08762	393	433	459	224	364	272	401	519	381	375	236	262	184	139	164	396	410	222	[["None"]]
K08764	0	0	0	0	0	0	0	0	0	0	0	0	0	0	0	0	0	0	[["None"]]
K08765	0	0	0	0	0	0	0	0	0	0	0	0	0	0	0	0	0	0	[["Metabolism", "Lipid Metabolism", "Fatty acid metabolism"], ["Organismal Systems", "Endocrine System", "PPAR signaling pathway"], ["Organismal Systems", "Endocrine System", "Adipocytokine signaling pathway"]]
K10418	0	0	0	0	0	0	0	0	0	0	0	0	0	0	0	0	0	0	[["None"]]
K11325	52	55	86	32	29	23	41	36	26	114	71	67	54	80	104	93	46	302	[["Unclassified", "Metabolism", "Amino acid metabolism"]]
K11326	0	0	0	0	0	0	0	0	0	0	0	0	0	0	0	0	0	0	[["Environmental Information Processing", "Signal Transduction", "Two-component system"]]
K11327	0	0	0	0	0	0	0	0	0	0	0	0	0	0	0	0	0	0	[["Environmental Information Processing", "Signal Transduction", "Two-component system"]]
K11328	0	0	0	0	0	0	0	0	0	0	0	0	0	0	0	0	0	0	[["Metabolism", "Enzyme Families", "Protein kinases"], ["Environmental Information Processing", "Signal Transduction", "Two-component system"]]
K11329	190	167	202	56	88	76	56	142	146	233	193	107	47	96	39	192	65	850	[["Environmental Information Processing", "Signal Transduction", "Two-component system"]]
K00151	1624	1714	1767	2506	1699	1222	816	1127	1110	1737	2368	1629	2857	1665	2413	2223	1640	1838	[["Metabolism", "Amino Acid Metabolism", "Tyrosine metabolism"]]
K00150	16	1	10	0	0	2	12	0	2	52	38	2	15	36	1	26	4	284	[["Metabolism", "Carbohydrate Metabolism", "Glycolysis / Gluconeogenesis"], ["Metabolism", "Energy Metabolism", "Carbon fixation in photosynthetic organisms"]]
K00153	2124	2825	2547	1312	1828	1176	1696	1692	1260	2888	2465	2592	2752	2082	2791	3568	2767	1795	[["Unclassified", "Metabolism", "Energy metabolism"]]
K00400	0	0	0	0	0	0	0	0	0	0	0	0	0	0	0	0	0	0	[["Metabolism", "Energy Metabolism", "Methane metabolism"]]
K00407	5273	5850	5889	4229	6328	4861	4811	5818	5391	4500	5211	5122	6584	5287	6712	5357	5089	5397	[["Metabolism", "Energy Metabolism", "Oxidative phosphorylation"]]
K00406	10493	12543	12248	8935	13796	10034	11932	13179	13080	11492	11131	12343	12579	10902	12794	11261	11171	11034	[["Metabolism", "Energy Metabolism", "Oxidative phosphorylation"]]
K00405	9209	10427	10440	8612	12660	9591	9978	11042	10681	9847	10092	10291	12225	9393	11219	10259	10387	9429	[["Metabolism", "Energy Metabolism", "Oxidative phosphorylation"]]
K00404	8472	9808	9773	8263	12021	9142	9394	10213	9989	9322	9590	9873	11818	9086	10920	9679	9818	8912	[["Metabolism", "Energy Metabolism", "Oxidative phosphorylation"]]
K00158	70	75	89	46	72	72	26	47	23	45	59	68	184	186	77	147	66	110	[["Metabolism", "Carbohydrate Metabolism", "Pyruvate metabolism"]]
K01342	17	26	14	9	7	4	9	6	6	16	8	9	138	34	55	19	29	12	[["Genetic Information Processing", "Folding, Sorting and Degradation", "Chaperones and folding catalysts"], ["Metabolism", "Enzyme Families", "Peptidases"]]
K09388	15	18	14	6	4	4	6	1	3	9	5	6	135	31	46	11	19	7	[["Unclassified", "Poorly Characterized", "Function unknown"]]
K09386	6808	7902	7564	4851	6716	5215	6050	6867	5651	8441	7060	8439	8154	7577	9657	7569	7473	5702	[["Unclassified", "Poorly Characterized", "Function unknown"]]
K09384	294	239	211	231	148	224	154	108	104	328	272	208	429	218	320	310	223	401	[["Unclassified", "Poorly Characterized", "Function unknown"]]
K04094	10694	13323	12689	10943	14677	11732	14485	14878	15526	14468	12370	14238	12782	13009	12879	12211	12541	11327	[["Genetic Information Processing", "Replication and Repair", "Chromosome"]]
K04095	1150	809	835	2821	756	1669	776	661	764	1466	1686	790	1005	1991	1258	1128	936	1328	[["Genetic Information Processing", "Replication and Repair", "Chromosome"]]
K04096	23310	26468	25092	22434	27371	23231	23991	26177	25578	28161	25216	26926	26787	25427	26493	25913	27021	23855	[["Unclassified", "Genetic Information Processing", "Replication, recombination and repair proteins"]]
K04097	9684	9428	9990	7813	9966	7760	8329	9752	9336	8336	10167	9462	9346	9587	9442	8844	8264	8985	[["Metabolism", "Metabolism of Other Amino Acids", "Glutathione metabolism"]]
K04090	5941	6842	7552	4605	6485	4843	6099	6701	6638	6723	6312	7357	7166	6431	6654	6448	6516	6684	[["Unclassified", "Metabolism", "Energy metabolism"]]
K04091	15898	19235	18989	13849	18381	13910	17207	17338	16878	22817	18930	21291	20838	19593	22308	21092	19399	16331	[["Unclassified", "Metabolism", "Energy metabolism"]]
K04092	3528	3854	3724	2541	3532	2375	3016	3201	3748	3476	3467	3749	4036	4149	3458	3380	2935	4161	[["Metabolism", "Amino Acid Metabolism", "Phenylalanine, tyrosine and tryptophan biosynthesis"]]
K04093	1693	3425	2547	2667	3622	2976	4569	3699	4228	5091	3635	4127	2833	3941	3553	3134	3543	2429	[["Metabolism", "Amino Acid Metabolism", "Phenylalanine, tyrosine and tryptophan biosynthesis"]]
K04098	365	375	529	285	338	201	275	294	240	520	410	534	671	374	478	694	400	426	[["Metabolism", "Xenobiotics Biodegradation and Metabolism", "Chlorocyclohexane and chlorobenzene degradation"], ["Metabolism", "Xenobiotics Biodegradation and Metabolism", "Benzoate degradation"]]
K04099	110	122	127	46	73	65	27	90	116	144	127	122	78	58	83	141	75	323	[["Metabolism", "Xenobiotics Biodegradation and Metabolism", "Aminobenzoate degradation"], ["Metabolism", "Xenobiotics Biodegradation and Metabolism", "Polycyclic aromatic hydrocarbon degradation"], ["Metabolism", "Xenobiotics Biodegradation and Metabolism", "Benzoate degradation"]]
K01578	2375	2557	2952	1637	2496	2043	2318	2599	2349	2494	2361	2817	2435	2398	2673	2583	2592	2233	[["Metabolism", "Carbohydrate Metabolism", "Propanoate metabolism"], ["Metabolism", "Metabolism of Other Amino Acids", "beta-Alanine metabolism"], ["Cellular Processes", "Transport and Catabolism", "Peroxisome"]]
K01579	11948	12639	11944	11518	12990	11397	9723	11470	10386	13842	12431	12941	14186	12055	13288	13430	14536	11852	[["Metabolism", "Metabolism of Other Amino Acids", "beta-Alanine metabolism"], ["Metabolism", "Metabolism of Cofactors and Vitamins", "Pantothenate and CoA biosynthesis"]]
K01574	1610	1704	1643	1089	1407	1119	1278	1349	1118	1961	1808	1916	1977	2117	2352	2055	1883	1552	[["Metabolism", "Carbohydrate Metabolism", "Propanoate metabolism"], ["Metabolism", "Lipid Metabolism", "Synthesis and degradation of ketone bodies"]]
K01575	541	604	406	391	410	557	238	337	254	409	358	359	570	783	698	600	423	537	[["Metabolism", "Carbohydrate Metabolism", "C5-Branched dibasic acid metabolism"], ["Metabolism", "Carbohydrate Metabolism", "Butanoate metabolism"]]
K01576	1644	1926	2100	1614	2099	1524	2109	2023	1940	2843	2037	2213	2312	1572	2311	2380	2034	1817	[["Metabolism", "Xenobiotics Biodegradation and Metabolism", "Aminobenzoate degradation"]]
K01577	1300	1362	1384	977	1211	1127	1284	1472	1254	1503	1387	1605	1244	1408	1637	1419	1439	1268	[["Metabolism", "Carbohydrate Metabolism", "Glyoxylate and dicarboxylate metabolism"]]
K01571	2168	2875	2458	3453	3202	2423	3031	2744	3136	3135	3159	2663	2295	3091	2835	2654	2810	2388	[["Metabolism", "Carbohydrate Metabolism", "Pyruvate metabolism"], ["Metabolism", "Amino Acid Metabolism", "Arginine and proline metabolism"]]
K01572	2329	2373	2440	4319	2344	3678	1901	2713	2612	2906	2723	2118	2215	2897	1862	2535	2623	3577	[["Metabolism", "Carbohydrate Metabolism", "Pyruvate metabolism"], ["Metabolism", "Amino Acid Metabolism", "Arginine and proline metabolism"]]
K01573	115	176	140	304	125	172	96	131	205	360	150	104	76	385	92	184	158	356	[["Metabolism", "Carbohydrate Metabolism", "Pyruvate metabolism"], ["Metabolism", "Amino Acid Metabolism", "Arginine and proline metabolism"]]
K02009	219	177	204	785	139	340	162	164	117	401	440	111	168	449	257	165	196	468	[["Environmental Information Processing", "Membrane Transport", "ABC transporters"], ["Environmental Information Processing", "Membrane Transport", "Transporters"]]
K02008	16326	18321	16511	17639	14040	12670	12588	13639	12304	20023	18138	16617	17399	16403	17659	18146	19142	16741	[["Environmental Information Processing", "Membrane Transport", "ABC transporters"], ["Environmental Information Processing", "Membrane Transport", "Transporters"]]
K02005	34183	42009	40146	33300	49565	40952	47495	47516	50071	48405	38301	45878	41981	38913	39447	40099	44603	35500	[["Unclassified", "Cellular Processes and Signaling", "Membrane and intracellular structural molecules"]]
K02004	143789	188866	171650	150310	212925	171061	206727	196104	206661	218449	172970	201242	196269	176234	184893	184331	200427	150009	[["Environmental Information Processing", "Membrane Transport", "Transporters"]]
K02007	3815	4324	4177	3887	3445	3196	3046	3486	3235	4312	4245	4205	3543	3111	3331	4590	5215	3812	[["Environmental Information Processing", "Membrane Transport", "ABC transporters"], ["Environmental Information Processing", "Membrane Transport", "Transporters"]]
K02006	16783	18682	16513	20594	13920	13122	12379	13275	11758	21026	19954	16786	17886	18305	18093	18691	19376	18568	[["Environmental Information Processing", "Membrane Transport", "ABC transporters"], ["Environmental Information Processing", "Membrane Transport", "Transporters"]]
K02001	5445	6674	6362	5859	5874	4637	5046	5468	5205	5506	6167	5932	6751	5831	6508	6765	5565	4968	[["Environmental Information Processing", "Membrane Transport", "ABC transporters"], ["Environmental Information Processing", "Membrane Transport", "Transporters"]]
K02000	4844	5941	5897	6155	5411	4301	4758	5141	4874	4918	5998	5346	6207	5167	5768	6067	5129	4479	[["Environmental Information Processing", "Membrane Transport", "ABC transporters"], ["Environmental Information Processing", "Membrane Transport", "Transporters"]]
K02003	87918	105037	97869	88488	108297	88857	99651	99947	99953	122714	100999	109974	108722	100199	106014	110167	112297	90360	[["Environmental Information Processing", "Membrane Transport", "Transporters"]]
K02002	6929	8104	8166	7390	7341	5760	6230	6849	6237	7768	7940	7864	8556	7202	8331	7824	7530	6703	[["Environmental Information Processing", "Membrane Transport", "ABC transporters"], ["Environmental Information Processing", "Membrane Transport", "Transporters"]]
K03065	0	0	0	0	0	0	0	0	0	0	0	0	0	0	0	0	0	0	[["None"]]
K08952	38	20	16	11	53	50	6	52	44	18	6	21	49	18	5	8	8	76	[["Metabolism", "Energy Metabolism", "Photosynthesis proteins"]]
K03060	18733	22522	20913	18871	23427	18284	20942	21679	21708	23998	21933	23625	22844	21503	22928	21725	22972	19456	[["Metabolism", "Nucleotide Metabolism", "Pyrimidine metabolism"], ["Genetic Information Processing", "Transcription", "Transcription machinery"], ["Genetic Information Processing", "Replication and Repair", "DNA repair and recombination proteins"], ["Metabolism", "Nucleotide Metabolism", "Purine metabolism"], ["Genetic Information Processing", "Transcription", "RNA polymerase"]]
K13809	0	0	0	0	0	0	0	0	0	0	0	0	0	0	0	0	0	0	[["None"]]
K10948	0	0	0	0	1	0	0	0	0	0	0	0	0	0	0	3	0	23	[["Genetic Information Processing", "Folding, Sorting and Degradation", "Chaperones and folding catalysts"], ["Organismal Systems", "Immune System", "NOD-like receptor signaling pathway"], ["Environmental Information Processing", "Signaling Molecules and Interaction", "Bacterial toxins"], ["Human Diseases", "Infectious Diseases", "Vibrio cholerae infection"]]
K09607	1564	2187	1769	1002	1280	788	1438	1308	1022	2274	1686	1909	2126	1259	1783	2403	2170	1277	[["Metabolism", "Enzyme Families", "Peptidases"]]
K06125	52	49	0	4	29	12	59	27	37	0	3	28	15	11	14	2	1	0	[["Metabolism", "Metabolism of Terpenoids and Polyketides", "Prenyltransferases"], ["Metabolism", "Metabolism of Cofactors and Vitamins", "Ubiquinone and other terpenoid-quinone biosynthesis"]]
K04337	2	5	4	72	3	0	0	0	0	50	16	0	0	3	0	2	2	54	[["Environmental Information Processing", "Membrane Transport", "Secretion system"]]
K06120	32	1	1	203	0	58	1	0	12	1	121	20	57	43	86	47	0	103	[["Metabolism", "Lipid Metabolism", "Glycerolipid metabolism"]]
K06121	0	0	0	0	0	0	0	0	0	0	0	0	0	0	22	0	0	3	[["Metabolism", "Lipid Metabolism", "Glycerolipid metabolism"]]
K04336	2	5	4	118	4	18	2	0	0	51	29	0	1	6	0	2	4	35	[["Environmental Information Processing", "Membrane Transport", "Secretion system"]]
K01127	2	3	0	0	3	2	3	7	8	0	0	0	0	0	0	0	0	4	[["Metabolism", "Glycan Biosynthesis and Metabolism", "Glycosylphosphatidylinositol(GPI)-anchor biosynthesis"]]
K09703	4313	5373	5134	3067	4378	2944	4099	4325	4118	6458	4616	6274	5743	5128	5823	4971	5170	4782	[["Unclassified", "Poorly Characterized", "Function unknown"]]
K00004	185	251	408	121	203	160	137	121	98	328	227	265	287	301	1084	259	232	493	[["Metabolism", "Carbohydrate Metabolism", "Butanoate metabolism"]]
K14699	24	40	24	43	20	12	32	20	33	62	82	52	64	49	50	40	49	36	[["None"]]
K09702	2493	2786	2722	1876	2382	2006	2025	2620	2291	2466	2008	2216	2886	1969	2119	3301	2671	2479	[["Unclassified", "Poorly Characterized", "Function unknown"]]
K14698	24	40	24	43	20	12	32	20	33	62	82	52	64	49	50	40	49	36	[["None"]]
K05311	161	84	55	76	79	144	63	45	38	39	85	60	230	271	162	186	150	464	[["Genetic Information Processing", "Transcription", "Transcription factors"]]
K13829	4294	4479	4950	2678	4042	3162	3519	4499	4100	4958	2990	3984	4043	3324	4588	3807	4441	3396	[["Metabolism", "Amino Acid Metabolism", "Phenylalanine, tyrosine and tryptophan biosynthesis"]]
K10943	3966	4174	4306	3545	4333	3385	3738	4409	4827	4031	4110	4778	3706	3683	3103	3638	4466	4182	[["Human Diseases", "Infectious Diseases", "Vibrio cholerae pathogenic cycle"], ["Environmental Information Processing", "Signal Transduction", "Two-component system"]]
K07291	36	40	32	20	9	6	20	17	26	64	40	64	30	22	31	26	16	20	[["Unclassified", "Metabolism", "Lipid metabolism"]]
K07290	3381	3663	3831	3106	4947	3384	3191	3319	3522	3810	4350	4685	6221	4557	4045	4336	4059	4584	[["Unclassified", "Cellular Processes and Signaling", "Membrane and intracellular structural molecules"]]
K10206	2716	2604	2644	4113	2854	3274	2129	3028	2792	3052	3199	2627	2401	2414	1772	2837	3756	3915	[["Metabolism", "Amino Acid Metabolism", "Lysine biosynthesis"], ["Metabolism", "Amino Acid Metabolism", "Amino acid related enzymes"]]
K10202	1153	1695	1229	821	1173	629	1323	989	865	1501	1447	1448	1752	937	1117	2320	1727	812	[["Environmental Information Processing", "Membrane Transport", "ABC transporters"], ["Environmental Information Processing", "Membrane Transport", "Transporters"]]
K10208	25	35	10	7	29	6	4	19	18	0	18	30	6	81	16	63	15	10	[["Metabolism", "Metabolism of Terpenoids and Polyketides", "Prenyltransferases"], ["Metabolism", "Metabolism of Terpenoids and Polyketides", "Carotenoid biosynthesis"]]
K10209	29	41	11	17	30	7	5	20	20	6	22	33	11	91	23	71	26	16	[["Metabolism", "Metabolism of Terpenoids and Polyketides", "Carotenoid biosynthesis"]]
K01966	22283	28275	25978	18340	27253	20983	27358	27289	27594	30035	23876	28447	26044	25268	27255	26711	26766	20958	[["Metabolism", "Carbohydrate Metabolism", "Propanoate metabolism"], ["Metabolism", "Carbohydrate Metabolism", "Glyoxylate and dicarboxylate metabolism"], ["Metabolism", "Energy Metabolism", "Carbon fixation pathways in prokaryotes"], ["Metabolism", "Amino Acid Metabolism", "Valine, leucine and isoleucine degradation"]]
K01965	10743	11799	11498	7436	10646	8028	9927	10726	9922	11768	10223	11815	11880	10275	11536	11251	10865	9746	[["Metabolism", "Carbohydrate Metabolism", "Propanoate metabolism"], ["Metabolism", "Carbohydrate Metabolism", "Glyoxylate and dicarboxylate metabolism"], ["Metabolism", "Energy Metabolism", "Carbon fixation pathways in prokaryotes"], ["Metabolism", "Amino Acid Metabolism", "Valine, leucine and isoleucine degradation"]]
K01964	14	0	1	1	17	0	18	1	1	11	16	1	17	43	15	0	5	10	[["None"]]
K01963	18572	22037	20720	18337	23439	18007	20993	21669	21698	23838	21950	23420	22954	21019	22722	21608	22651	19189	[["Metabolism", "Carbohydrate Metabolism", "Propanoate metabolism"], ["Metabolism", "Lipid Metabolism", "Fatty acid biosynthesis"], ["Metabolism", "Energy Metabolism", "Carbon fixation pathways in prokaryotes"], ["Metabolism", "Carbohydrate Metabolism", "Pyruvate metabolism"], ["Metabolism", "Metabolism of Terpenoids and Polyketides", "Tetracycline biosynthesis"]]
K01962	15364	17921	17083	17164	20450	15920	18161	18843	19349	18627	18976	19249	18926	17830	18487	17300	18247	16485	[["Metabolism", "Carbohydrate Metabolism", "Propanoate metabolism"], ["Metabolism", "Lipid Metabolism", "Fatty acid biosynthesis"], ["Metabolism", "Energy Metabolism", "Carbon fixation pathways in prokaryotes"], ["Metabolism", "Carbohydrate Metabolism", "Pyruvate metabolism"], ["Metabolism", "Metabolism of Terpenoids and Polyketides", "Tetracycline biosynthesis"]]
K01961	39683	46331	44586	41501	50935	40879	44968	48288	48721	48137	45328	47826	48036	43171	45363	45487	47022	40999	[["Metabolism", "Carbohydrate Metabolism", "Propanoate metabolism"], ["Metabolism", "Lipid Metabolism", "Fatty acid biosynthesis"], ["Metabolism", "Energy Metabolism", "Carbon fixation pathways in prokaryotes"], ["Metabolism", "Carbohydrate Metabolism", "Pyruvate metabolism"], ["Metabolism", "Metabolism of Terpenoids and Polyketides", "Tetracycline biosynthesis"]]
K01960	3157	2961	2957	3099	2876	4420	2342	3235	2960	3031	2226	2901	2481	2679	1935	2893	3947	3244	[["Metabolism", "Carbohydrate Metabolism", "Citrate cycle (TCA cycle)"], ["Metabolism", "Energy Metabolism", "Carbon fixation pathways in prokaryotes"], ["Metabolism", "Carbohydrate Metabolism", "Pyruvate metabolism"]]
K01969	10995	11830	12065	8180	12784	9499	9883	10818	10272	12383	11555	13308	14586	12159	13846	12415	12064	10777	[["Metabolism", "Amino Acid Metabolism", "Valine, leucine and isoleucine degradation"]]
K01968	8720	9280	9736	6916	10857	8043	8399	9463	9377	8594	8898	9969	11724	9501	9871	9545	8963	8886	[["Metabolism", "Amino Acid Metabolism", "Valine, leucine and isoleucine degradation"]]
K07749	19152	21645	21774	15301	19274	14718	17327	19374	17153	22237	21075	22790	21252	19982	24363	22954	21327	17966	[["Unclassified", "Metabolism", "Energy metabolism"]]
K07748	310	343	396	398	558	306	462	561	732	308	173	221	200	105	266	227	314	201	[["Metabolism", "Lipid Metabolism", "Steroid biosynthesis"]]
K07741	213	118	154	382	223	507	123	167	231	189	401	331	323	380	434	497	298	466	[["Unclassified", "Genetic Information Processing", "Transcription related proteins"]]
K07740	95	109	124	202	89	97	42	51	85	195	131	49	19	126	24	74	84	282	[["Unclassified", "Genetic Information Processing", "Transcription related proteins"]]
K07743	12	20	14	23	21	12	3	10	30	9	9	8	11	0	7	36	40	3	[["Unclassified", "Genetic Information Processing", "Others"]]
K07742	7900	8858	8470	7351	8335	6536	7421	7677	7387	8500	9042	9044	9564	9744	9354	9465	7913	8664	[["Unclassified", "Genetic Information Processing", "Others"]]
K07745	0	0	0	0	0	0	0	0	0	0	0	0	0	0	0	0	0	0	[["Unclassified", "Genetic Information Processing", "Others"]]
K07744	0	0	0	0	0	0	0	0	0	0	0	0	0	0	0	0	0	0	[["Unclassified", "Genetic Information Processing", "Others"]]
K07746	8454	10351	9756	9079	11541	9519	12039	11745	11798	11482	10887	11516	9765	10951	10846	9970	10172	7451	[["Unclassified", "Genetic Information Processing", "Others"]]
K01299	2333	2689	2794	2263	2685	2061	2556	3053	2826	2649	2195	2478	2370	2281	2465	2316	2376	2518	[["Metabolism", "Enzyme Families", "Peptidases"]]
K01295	11101	13469	13062	9526	13911	10706	14326	13929	14107	16308	12531	15244	12610	12704	13660	12105	13239	10794	[["Metabolism", "Enzyme Families", "Peptidases"]]
K01297	10542	12740	12251	9517	14761	11517	12920	13474	13917	14285	11689	13384	13948	11423	12322	13440	13359	11039	[["Metabolism", "Enzyme Families", "Peptidases"]]
K02922	0	0	0	0	0	0	0	0	0	0	0	0	0	0	0	0	0	0	[["Genetic Information Processing", "Translation", "Ribosome"]]
K05603	1550	1826	2003	1137	1964	1210	1469	2012	2034	1651	1350	1537	2497	1259	1956	1582	1516	1528	[["Metabolism", "Amino Acid Metabolism", "Histidine metabolism"]]
K02921	0	0	0	0	0	0	0	0	0	0	0	0	0	0	0	0	0	0	[["Genetic Information Processing", "Translation", "Ribosome"]]
K02926	22012	25098	23659	21607	26045	22192	23194	24660	24401	26780	24156	25757	25634	24257	25032	24410	25521	22721	[["Genetic Information Processing", "Translation", "Ribosome"]]
K05607	0	0	0	0	0	0	0	0	0	0	0	0	0	0	0	0	0	0	[["Metabolism", "Amino Acid Metabolism", "Valine, leucine and isoleucine degradation"]]
K02924	0	0	0	0	0	0	0	0	0	0	0	0	0	0	0	0	0	0	[["Genetic Information Processing", "Translation", "Ribosome"]]
K05605	0	0	0	0	0	0	0	0	0	0	0	0	0	0	0	0	0	0	[["Metabolism", "Carbohydrate Metabolism", "Propanoate metabolism"], ["Metabolism", "Metabolism of Other Amino Acids", "beta-Alanine metabolism"], ["Metabolism", "Amino Acid Metabolism", "Valine, leucine and isoleucine degradation"]]
K02928	0	0	0	0	0	0	0	0	0	0	0	0	0	0	0	0	0	0	[["Genetic Information Processing", "Translation", "Ribosome"]]
K02929	0	0	0	0	0	0	0	0	0	0	0	0	0	0	0	0	0	0	[["Genetic Information Processing", "Translation", "Ribosome"]]
K00216	2328	2442	2586	1511	2179	1500	1988	2243	1966	3502	1814	2568	2687	1788	2984	2135	2494	1666	[["Metabolism", "Metabolism of Terpenoids and Polyketides", "Biosynthesis of siderophore group nonribosomal peptides"]]
K00217	682	710	816	564	724	634	747	752	629	1027	803	904	1211	842	966	838	895	740	[["Metabolism", "Xenobiotics Biodegradation and Metabolism", "Toluene degradation"], ["Metabolism", "Xenobiotics Biodegradation and Metabolism", "Chlorocyclohexane and chlorobenzene degradation"], ["Metabolism", "Xenobiotics Biodegradation and Metabolism", "Fluorobenzoate degradation"], ["Metabolism", "Xenobiotics Biodegradation and Metabolism", "Benzoate degradation"]]
K00214	0	0	0	0	0	0	0	0	0	0	0	0	0	0	0	0	0	0	[["Metabolism", "Metabolism of Cofactors and Vitamins", "Porphyrin and chlorophyll metabolism"]]
K00215	24957	28567	27027	23993	29058	24449	25508	27257	26582	31105	27971	30106	30218	27667	29681	28147	30156	25643	[["Metabolism", "Amino Acid Metabolism", "Lysine biosynthesis"]]
K00213	12	3	0	0	2	2	2	1	0	0	4	4	2	0	4	0	2	2	[["Metabolism", "Lipid Metabolism", "Steroid biosynthesis"]]
K00210	939	1340	865	753	1409	833	747	870	919	1042	893	1104	2095	1390	2260	1430	1192	1448	[["Metabolism", "Amino Acid Metabolism", "Phenylalanine, tyrosine and tryptophan biosynthesis"], ["Metabolism", "Biosynthesis of Other Secondary Metabolites", "Novobiocin biosynthesis"]]
K00211	20	6	23	19	39	17	16	6	11	5	13	37	31	19	33	38	18	21	[["Metabolism", "Amino Acid Metabolism", "Phenylalanine, tyrosine and tryptophan biosynthesis"]]
K00218	251	246	436	81	140	116	121	171	55	323	293	207	136	120	228	440	129	454	[["Metabolism", "Metabolism of Cofactors and Vitamins", "Porphyrin and chlorophyll metabolism"]]
K00219	3774	4621	4536	4461	5291	3668	2868	3461	2996	4580	5271	4995	6383	4538	5476	5522	5220	4358	[["Unclassified", "Metabolism", "Energy metabolism"]]
K01035	84	83	111	109	103	61	88	71	71	102	101	108	122	193	185	159	96	77	[["Metabolism", "Carbohydrate Metabolism", "Propanoate metabolism"], ["Metabolism", "Xenobiotics Biodegradation and Metabolism", "Aminobenzoate degradation"], ["Metabolism", "Carbohydrate Metabolism", "Butanoate metabolism"], ["Environmental Information Processing", "Signal Transduction", "Two-component system"]]
K01034	662	693	719	928	697	666	754	783	659	821	927	769	1120	905	894	730	944	625	[["Metabolism", "Carbohydrate Metabolism", "Propanoate metabolism"], ["Metabolism", "Xenobiotics Biodegradation and Metabolism", "Aminobenzoate degradation"], ["Metabolism", "Carbohydrate Metabolism", "Butanoate metabolism"], ["Environmental Information Processing", "Signal Transduction", "Two-component system"]]
K04517	17769	20612	19724	16688	21161	17445	19572	20306	20245	22921	20174	21835	20528	19343	19753	19809	21585	18365	[["Metabolism", "Amino Acid Metabolism", "Phenylalanine, tyrosine and tryptophan biosynthesis"], ["Metabolism", "Biosynthesis of Other Secondary Metabolites", "Novobiocin biosynthesis"]]
K01740	20730	22037	22474	20608	22785	20980	18795	22317	20508	22297	21295	21814	22642	20645	21646	22649	22345	20517	[["Metabolism", "Amino Acid Metabolism", "Cysteine and methionine metabolism"]]
K01031	1585	1797	1896	859	1329	939	921	1271	1036	1544	1555	1821	2417	1708	1922	1784	1477	1951	[["Metabolism", "Xenobiotics Biodegradation and Metabolism", "Benzoate degradation"]]
K01746	47	25	49	154	29	28	55	42	27	36	88	38	31	24	56	87	48	69	[["Metabolism", "Metabolism of Cofactors and Vitamins", "One carbon pool by folate"]]
K01745	16267	19297	18969	14777	20441	15963	18318	19000	18214	21791	17379	20222	20859	17505	19665	19356	19780	15605	[["Metabolism", "Amino Acid Metabolism", "Histidine metabolism"], ["Metabolism", "Energy Metabolism", "Nitrogen metabolism"]]
K01744	7524	9024	8243	9293	9982	9981	9605	9148	9735	11022	9509	9405	8209	9686	9209	8210	9914	8158	[["Metabolism", "Amino Acid Metabolism", "Alanine, aspartate and glutamate metabolism"], ["Metabolism", "Energy Metabolism", "Nitrogen metabolism"]]
K01749	20444	24105	22678	19026	24960	19444	22156	23773	23401	25244	22832	24994	24130	21970	24112	23290	24306	20498	[["Metabolism", "Metabolism of Cofactors and Vitamins", "Porphyrin and chlorophyll metabolism"]]
K01039	5952	7681	7058	4471	6417	4241	5817	6230	5700	8353	6330	8187	8614	6600	8286	7734	7502	6213	[["Metabolism", "Carbohydrate Metabolism", "Butanoate metabolism"], ["Metabolism", "Xenobiotics Biodegradation and Metabolism", "Styrene degradation"]]
K04518	14690	17862	16547	12645	17460	14420	17335	17305	17144	19878	16104	18978	17830	17085	18263	17498	17190	14668	[["Metabolism", "Amino Acid Metabolism", "Phenylalanine, tyrosine and tryptophan biosynthesis"]]
K09591	0	0	0	0	0	0	0	0	0	0	0	0	0	0	0	0	0	0	[["None"]]
K14129	0	0	0	0	0	0	0	0	0	0	0	0	0	0	0	0	0	0	[["Metabolism", "Metabolism of Terpenoids and Polyketides", "Prenyltransferases"]]
K14128	692	618	634	522	722	772	553	649	609	668	504	898	453	263	206	552	1507	568	[["Metabolism", "Energy Metabolism", "Methane metabolism"]]
K14121	0	0	0	0	0	0	0	0	0	0	0	0	0	0	0	0	0	0	[["Metabolism", "Energy Metabolism", "Methane metabolism"]]
K14120	0	0	0	0	0	0	0	0	0	0	0	0	0	0	0	0	0	0	[["Metabolism", "Energy Metabolism", "Methane metabolism"]]
K14123	0	0	0	0	0	0	0	0	0	0	0	0	0	0	0	0	0	0	[["Metabolism", "Energy Metabolism", "Methane metabolism"]]
K14122	0	0	0	0	0	0	0	0	0	0	0	0	0	0	0	0	0	0	[["Metabolism", "Energy Metabolism", "Methane metabolism"]]
K14125	0	0	0	0	0	0	0	0	0	0	0	0	0	0	0	0	0	0	[["Metabolism", "Energy Metabolism", "Methane metabolism"]]
K14124	0	0	0	0	0	0	0	0	0	0	0	0	0	0	0	0	0	0	[["Metabolism", "Energy Metabolism", "Methane metabolism"]]
K14127	993	1103	1040	744	1063	1066	918	1206	1110	1072	724	1352	622	383	366	845	2004	736	[["Metabolism", "Energy Metabolism", "Methane metabolism"]]
K14126	756	679	696	566	775	825	652	786	772	750	550	972	515	290	272	595	1560	612	[["Metabolism", "Energy Metabolism", "Methane metabolism"]]
K03521	26667	30362	29570	24803	31392	26404	28380	30745	30290	31665	28395	31098	29636	27899	29633	29020	31134	25907	[["Unclassified", "Metabolism", "Energy metabolism"]]
K03520	8785	10025	9933	6830	9206	6945	8642	9267	7847	11083	9089	10713	10154	9806	12840	10267	10141	7045	[["Metabolism", "Xenobiotics Biodegradation and Metabolism", "Nitrotoluene degradation"], ["Metabolism", "Energy Metabolism", "Methane metabolism"]]
K03523	8845	11752	10307	9288	12039	9395	11906	11046	11213	14295	11167	12596	11749	11958	12539	11418	11796	9218	[["Unclassified", "Poorly Characterized", "General function prediction only"]]
K03522	27088	30787	30210	25327	31994	26762	28888	31367	31033	32069	28746	31401	29902	28063	30029	29423	31455	26271	[["Unclassified", "Metabolism", "Energy metabolism"]]
K03525	19547	22557	21090	17932	23308	19610	20736	22227	22164	24206	21144	23498	22415	19949	20698	21419	24090	20238	[["Metabolism", "Metabolism of Cofactors and Vitamins", "Pantothenate and CoA biosynthesis"]]
K03524	22468	25558	24142	22066	26759	23044	23624	25235	24844	27447	24724	26613	25952	24476	24674	24906	26823	23103	[["Metabolism", "Metabolism of Cofactors and Vitamins", "Biotin metabolism"], ["Genetic Information Processing", "Transcription", "Transcription factors"]]
K03527	21866	25375	23954	21926	26163	22258	23374	24507	24039	27472	25095	26811	26282	25038	26082	25632	26262	22617	[["Metabolism", "Metabolism of Terpenoids and Polyketides", "Terpenoid backbone biosynthesis"]]
K03526	21130	24367	22851	20963	25032	21495	22413	23588	23226	26091	23796	25316	25081	23813	24418	24004	24928	21562	[["Metabolism", "Metabolism of Terpenoids and Polyketides", "Terpenoid backbone biosynthesis"]]
K03529	20527	23769	22825	17996	25226	19813	22277	23890	23551	25432	21901	25073	24280	21977	23983	23302	24505	20928	[["Genetic Information Processing", "Replication and Repair", "Chromosome"]]
K03528	1242	1149	1280	2798	2320	1799	1107	1229	1155	1454	2341	1847	2667	1759	1509	1779	1907	1848	[["Genetic Information Processing", "Replication and Repair", "Chromosome"]]
K06338	1	2	1	0	1	1	4	2	0	3	0	1	2	1	2	0	1	31	[["Unclassified", "Cellular Processes and Signaling", "Sporulation"]]
K02217	1770	1551	1130	4876	1160	2609	1170	945	1213	1848	3286	1064	1593	3010	2156	1504	1518	2863	[["Metabolism", "Metabolism of Cofactors and Vitamins", "Porphyrin and chlorophyll metabolism"]]
K03299	1741	1503	1765	1225	1333	1176	884	1003	874	2670	2855	1967	1656	2305	2063	2323	1637	2403	[["Unclassified", "Cellular Processes and Signaling", "Other ion-coupled transporters"]]
K03298	753	739	910	1971	627	504	451	499	394	1018	1590	786	861	779	871	1082	706	877	[["Unclassified", "Cellular Processes and Signaling", "Other ion-coupled transporters"]]
K13472	9	14	21	2	10	12	0	3	2	7	34	8	3	29	0	29	8	22	[["Organismal Systems", "Environmental Adaptation", "Plant-pathogen interaction"]]
K03293	4428	4413	3938	7580	4868	4243	2254	2792	2380	4572	6943	4142	6506	5695	5017	5114	4666	6513	[["Unclassified", "Cellular Processes and Signaling", "Other ion-coupled transporters"]]
K03292	1930	1742	1487	5594	2148	2248	1021	1362	1771	2608	3835	1452	2029	3144	2081	2502	2033	4090	[["Unclassified", "Cellular Processes and Signaling", "Other ion-coupled transporters"]]
K03291	139	179	241	356	153	116	92	105	110	394	248	132	217	393	149	191	192	377	[["Environmental Information Processing", "Membrane Transport", "Transporters"]]
K03290	110	94	62	106	61	66	44	61	54	194	115	124	102	188	120	125	200	118	[["Environmental Information Processing", "Membrane Transport", "Transporters"]]
K03297	7629	8399	8416	8431	7524	5780	6963	7957	7520	8095	9205	8330	8511	7871	7557	8538	8026	8476	[["Unclassified", "Cellular Processes and Signaling", "Other ion-coupled transporters"]]
K03296	54059	61359	61164	53392	72703	59786	61894	67201	67592	63690	58863	65711	68236	58213	60557	61134	65147	55589	[["Unclassified", "Cellular Processes and Signaling", "Other ion-coupled transporters"]]
K03295	20790	24165	22908	17206	24978	19873	22336	23449	23085	25929	21791	25656	25738	22195	24996	23264	24732	20156	[["Unclassified", "Cellular Processes and Signaling", "Other ion-coupled transporters"]]
K03294	44347	57763	52894	42396	66175	49505	62094	59184	62183	67166	53790	64355	65034	55833	60193	57280	60088	47506	[["Unclassified", "Cellular Processes and Signaling", "Other ion-coupled transporters"]]
K13009	672	619	621	539	721	756	559	641	580	761	521	888	459	342	220	554	1496	654	[["Metabolism", "Glycan Biosynthesis and Metabolism", "Lipopolysaccharide biosynthesis proteins"]]
K12690	0	0	0	0	0	0	0	0	0	0	0	0	0	0	0	0	0	0	[["Environmental Information Processing", "Membrane Transport", "Secretion system"]]
K09743	0	0	0	0	0	0	0	0	0	0	0	0	0	0	0	0	0	0	[["Unclassified", "Poorly Characterized", "Function unknown"]]
K06022	25	33	16	25	41	25	38	62	39	8	26	14	10	27	12	9	9	1	[["Unclassified", "Metabolism", "Energy metabolism"]]
K07190	16	10	10	0	2	0	12	0	0	59	26	3	2	56	0	55	4	284	[["Organismal Systems", "Endocrine System", "Insulin signaling pathway"], ["Environmental Information Processing", "Signal Transduction", "Calcium signaling pathway"]]
K06021	269	323	304	216	385	215	218	230	224	265	314	436	349	468	600	603	306	212	[["Unclassified", "Metabolism", "Energy metabolism"]]
K07192	4427	5554	5406	4158	6034	4772	5739	6397	6914	4763	4119	4672	4699	3650	4208	5012	4939	4141	[["Organismal Systems", "Endocrine System", "Insulin signaling pathway"]]
K06020	2708	2763	3079	1639	3041	2343	2098	2584	2762	2401	2681	3107	2633	2750	3712	3653	2769	2674	[["Unclassified", "Metabolism", "Energy metabolism"]]
K06027	106	98	87	129	149	272	92	132	209	116	237	271	212	318	312	332	232	136	[["Organismal Systems", "Excretory System", "Vasopressin-regulated water reabsorption"]]
K06026	2	1	1	0	4	0	0	0	2	2	3	0	1	0	4	2	0	0	[["Unclassified", "Metabolism", "Others"]]
K09744	604	571	734	454	776	442	659	887	1009	540	274	332	249	222	401	346	367	589	[["Unclassified", "Poorly Characterized", "Function unknown"]]
K07991	0	0	0	0	0	0	0	0	0	0	0	0	0	0	0	0	0	0	[["Environmental Information Processing", "Membrane Transport", "Secretion system"], ["Cellular Processes", "Cell Motility", "Bacterial motility proteins"]]
K08749	0	0	0	0	0	0	0	0	0	0	0	0	0	0	0	0	0	0	[["None"]]
K09835	28	10	39	6	15	15	14	14	7	59	68	6	5	45	4	28	23	306	[["Metabolism", "Metabolism of Terpenoids and Polyketides", "Carotenoid biosynthesis"]]
K09834	16	0	10	0	0	0	12	0	0	52	26	0	2	36	0	26	4	284	[["Metabolism", "Metabolism of Cofactors and Vitamins", "Ubiquinone and other terpenoid-quinone biosynthesis"]]
K10439	23376	27430	26548	23611	25899	20123	24178	24229	22887	34057	28372	29752	27512	28486	31488	27525	28308	22709	[["Environmental Information Processing", "Membrane Transport", "ABC transporters"], ["Cellular Processes", "Cell Motility", "Bacterial chemotaxis"], ["Environmental Information Processing", "Membrane Transport", "Transporters"]]
K06351	50	44	59	45	72	38	24	11	21	24	60	60	204	87	86	64	53	75	[["Unclassified", "Cellular Processes and Signaling", "Sporulation"]]
K09833	16	0	10	0	0	0	12	0	0	52	26	0	2	36	0	26	4	284	[["Metabolism", "Metabolism of Terpenoids and Polyketides", "Prenyltransferases"], ["Metabolism", "Metabolism of Cofactors and Vitamins", "Ubiquinone and other terpenoid-quinone biosynthesis"]]
K10925	0	0	0	0	0	0	0	0	0	0	0	0	0	0	0	0	0	30	[["Environmental Information Processing", "Membrane Transport", "Secretion system"], ["Human Diseases", "Infectious Diseases", "Vibrio cholerae pathogenic cycle"]]
K10924	1079	948	1124	1243	1079	808	865	1138	1196	871	1166	655	599	596	848	737	750	1060	[["Environmental Information Processing", "Membrane Transport", "Secretion system"], ["Human Diseases", "Infectious Diseases", "Vibrio cholerae pathogenic cycle"]]
K10927	218	178	335	675	101	90	41	111	118	138	526	101	63	86	114	187	74	323	[["Environmental Information Processing", "Membrane Transport", "Secretion system"], ["Human Diseases", "Infectious Diseases", "Vibrio cholerae pathogenic cycle"]]
K10926	218	178	335	113	100	90	41	111	121	138	193	100	63	85	114	183	74	321	[["Environmental Information Processing", "Membrane Transport", "Secretion system"], ["Human Diseases", "Infectious Diseases", "Vibrio cholerae pathogenic cycle"]]
K10923	0	0	0	0	0	0	0	0	0	0	0	0	0	0	0	0	0	5	[["Genetic Information Processing", "Transcription", "Transcription factors"], ["Human Diseases", "Infectious Diseases", "Vibrio cholerae pathogenic cycle"]]
K10922	0	0	0	0	0	0	0	0	0	0	0	0	0	0	0	0	0	18	[["Human Diseases", "Infectious Diseases", "Vibrio cholerae pathogenic cycle"]]
K09629	0	0	0	0	0	2	0	0	0	0	0	0	417	1	11	0	0	0	[["None"]]
K10697	16	0	10	0	0	0	12	0	0	52	26	0	2	36	0	26	4	284	[["Environmental Information Processing", "Signal Transduction", "Two-component system"]]
K00179	3652	3810	3964	3865	3390	3631	2847	4215	3866	3859	3446	3775	3088	2686	2334	3382	4553	3839	[["Unclassified", "Metabolism", "Energy metabolism"]]
K00172	2827	3199	2678	2431	2548	2597	2043	2558	2315	2675	2693	3130	1997	2232	2065	2609	4363	2277	[["Metabolism", "Carbohydrate Metabolism", "Butanoate metabolism"], ["Metabolism", "Energy Metabolism", "Carbon fixation pathways in prokaryotes"], ["Metabolism", "Carbohydrate Metabolism", "Propanoate metabolism"], ["Metabolism", "Carbohydrate Metabolism", "Citrate cycle (TCA cycle)"], ["Metabolism", "Carbohydrate Metabolism", "Glycolysis / Gluconeogenesis"], ["Metabolism", "Carbohydrate Metabol…
K00171	1125	1334	906	1270	913	996	834	932	889	949	1346	1102	580	916	603	816	1734	912	[["Metabolism", "Carbohydrate Metabolism", "Butanoate metabolism"], ["Metabolism", "Energy Metabolism", "Carbon fixation pathways in prokaryotes"], ["Metabolism", "Carbohydrate Metabolism", "Propanoate metabolism"], ["Metabolism", "Carbohydrate Metabolism", "Citrate cycle (TCA cycle)"], ["Metabolism", "Carbohydrate Metabolism", "Glycolysis / Gluconeogenesis"], ["Metabolism", "Carbohydrate Metabol…
K00170	3416	3681	3223	2881	3088	3298	2559	3155	2886	3253	3046	3816	2282	2267	1942	2738	5725	2704	[["Metabolism", "Carbohydrate Metabolism", "Butanoate metabolism"], ["Metabolism", "Energy Metabolism", "Carbon fixation pathways in prokaryotes"], ["Metabolism", "Carbohydrate Metabolism", "Propanoate metabolism"], ["Metabolism", "Carbohydrate Metabolism", "Citrate cycle (TCA cycle)"], ["Metabolism", "Carbohydrate Metabolism", "Glycolysis / Gluconeogenesis"], ["Metabolism", "Carbohydrate Metabol…
K00177	4394	5272	4452	6365	4931	5787	4989	5121	5440	5147	5338	4758	3614	4764	3645	4069	5738	3828	[["Metabolism", "Carbohydrate Metabolism", "Citrate cycle (TCA cycle)"], ["Metabolism", "Energy Metabolism", "Carbon fixation pathways in prokaryotes"]]
K00176	6996	9733	8202	9493	10105	9429	11271	10075	11319	10477	9158	9542	7226	9029	7583	7741	10045	6554	[["Metabolism", "Carbohydrate Metabolism", "Citrate cycle (TCA cycle)"], ["Metabolism", "Energy Metabolism", "Carbon fixation pathways in prokaryotes"]]
K00175	13389	16192	14712	14403	14875	14619	15324	15355	15364	18141	14758	16200	13777	14920	14595	14990	16838	11907	[["Metabolism", "Carbohydrate Metabolism", "Citrate cycle (TCA cycle)"], ["Metabolism", "Energy Metabolism", "Carbon fixation pathways in prokaryotes"]]
K00174	13383	16159	14710	14310	14795	14571	15300	15300	15338	18061	14749	16179	13773	14714	14592	14978	16799	11877	[["Metabolism", "Carbohydrate Metabolism", "Citrate cycle (TCA cycle)"], ["Metabolism", "Energy Metabolism", "Carbon fixation pathways in prokaryotes"]]
K13478	0	0	0	0	0	0	0	0	0	0	0	0	0	0	0	0	0	0	[["Organismal Systems", "Environmental Adaptation", "Plant-pathogen interaction"]]
K14338	1576	1652	1856	1180	1646	1235	1539	1727	1861	1673	1378	1585	1706	1360	1819	1590	1585	1270	[["Metabolism", "Xenobiotics Biodegradation and Metabolism", "Aminobenzoate degradation"], ["Metabolism", "Amino Acid Metabolism", "Tryptophan metabolism"], ["Metabolism", "Lipid Metabolism", "Fatty acid metabolism"]]
K14339	1524	1932	1690	882	1163	679	1197	1183	818	1827	1862	1521	1964	1484	1875	2356	1904	1212	[["Metabolism", "Glycan Biosynthesis and Metabolism", "Glycosyltransferases"]]
K14335	4088	4323	4223	2801	4324	2774	3494	3916	4194	4082	4182	4373	4130	4435	4234	4097	3453	4143	[["Metabolism", "Glycan Biosynthesis and Metabolism", "Glycosyltransferases"]]
K14337	457	732	579	337	397	264	554	464	295	615	802	515	710	429	446	1002	561	394	[["Metabolism", "Glycan Biosynthesis and Metabolism", "Glycosyltransferases"]]
K14330	16	0	10	0	0	0	12	0	0	52	26	0	2	36	0	26	4	284	[["Unclassified", "Metabolism", "Lipid metabolism"]]
K14331	16	0	10	0	0	0	12	0	0	52	26	0	2	36	0	26	4	284	[["Unclassified", "Metabolism", "Lipid metabolism"]]
K14333	542	622	524	260	520	425	233	427	392	366	468	480	512	432	489	536	354	719	[["Metabolism", "Xenobiotics Biodegradation and Metabolism", "Aminobenzoate degradation"], ["Metabolism", "Xenobiotics Biodegradation and Metabolism", "Benzoate degradation"]]
K08918	0	0	0	0	0	0	0	0	0	0	0	0	0	0	0	0	0	0	[["Metabolism", "Energy Metabolism", "Photosynthesis proteins"]]
K13479	85	35	85	576	147	176	28	46	34	97	449	74	69	260	98	114	31	169	[["Metabolism", "Nucleotide Metabolism", "Purine metabolism"]]
K04078	28640	32923	31274	26287	32770	26973	29457	31526	30567	35186	30352	33754	32951	30897	33694	32136	33413	27989	[["Genetic Information Processing", "Folding, Sorting and Degradation", "Chaperones and folding catalysts"]]
K04079	11043	11335	11299	12549	12377	11708	9508	11396	10900	11998	12610	11175	13331	11314	11111	12799	11952	12834	[["Genetic Information Processing", "Folding, Sorting and Degradation", "Protein processing in endoplasmic reticulum"], ["Genetic Information Processing", "Folding, Sorting and Degradation", "Proteasome"], ["Organismal Systems", "Immune System", "Antigen processing and presentation"], ["Organismal Systems", "Endocrine System", "Progesterone-mediated oocyte maturation"], ["Human Diseases", "Cancer…
K04076	48	43	46	95	36	44	8	8	25	29	72	37	155	124	54	30	20	61	[["Metabolism", "Enzyme Families", "Peptidases"]]
K04077	28325	32609	31123	25930	32209	26740	29014	31233	30027	34237	30520	33262	32256	30747	32596	32379	32744	28156	[["Genetic Information Processing", "Folding, Sorting and Degradation", "Chaperones and folding catalysts"], ["Human Diseases", "Metabolic Diseases", "Type I diabetes mellitus"], ["Human Diseases", "Infectious Diseases", "Tuberculosis"], ["Genetic Information Processing", "Folding, Sorting and Degradation", "RNA degradation"]]
K04074	2623	2712	2701	2188	2736	2744	2164	3170	2865	2646	1967	2762	2389	1846	1780	2547	3648	2881	[["Genetic Information Processing", "Replication and Repair", "Chromosome"]]
K04075	21524	24577	23270	21348	25615	21579	22941	24391	24023	26339	23798	25200	25239	23630	24461	23771	25111	22141	[["Unclassified", "Genetic Information Processing", "Translation proteins"]]
K04072	4771	6044	5281	9366	6820	5793	7430	6155	7020	7946	8310	6310	5268	7847	5940	5434	6117	6842	[["Metabolism", "Xenobiotics Biodegradation and Metabolism", "Dioxin degradation"], ["Metabolism", "Carbohydrate Metabolism", "Butanoate metabolism"], ["Metabolism", "Lipid Metabolism", "Fatty acid metabolism"], ["Metabolism", "Xenobiotics Biodegradation and Metabolism", "Naphthalene degradation"], ["Metabolism", "Xenobiotics Biodegradation and Metabolism", "Benzoate degradation"], ["Metabolism",…
K04073	6754	8254	7902	4681	6679	4764	6368	6665	6426	8873	7214	8393	8985	6629	7912	8308	8180	6859	[["Metabolism", "Xenobiotics Biodegradation and Metabolism", "Xylene degradation"], ["Metabolism", "Xenobiotics Biodegradation and Metabolism", "Dioxin degradation"], ["Metabolism", "Carbohydrate Metabolism", "Pyruvate metabolism"], ["Metabolism", "Carbohydrate Metabolism", "Butanoate metabolism"], ["Metabolism", "Xenobiotics Biodegradation and Metabolism", "Benzoate degradation"]]
K04070	1429	1521	1383	2168	1614	1966	1179	1552	1455	1801	1595	1727	1056	1371	702	1436	2567	1676	[["Unclassified", "Genetic Information Processing", "Protein folding and associated processing"]]
K04071	0	3	24	49	15	16	16	16	32	47	7	17	0	36	24	30	24	55	[["Metabolism", "Metabolism of Cofactors and Vitamins", "Folate biosynthesis"]]
K14597	1014	2122	1742	1580	2519	1991	3386	2482	2990	3436	2102	2727	1976	2729	2234	1856	2296	1577	[["Metabolism", "Metabolism of Terpenoids and Polyketides", "Carotenoid biosynthesis"]]
K13318	43	21	16	6	6	17	2	6	1	12	9	4	3	4	6	20	3	10	[["Metabolism", "Metabolism of Terpenoids and Polyketides", "Polyketide sugar unit biosynthesis"]]
K08280	27	20	97	28	32	16	8	8	27	16	36	14	45	14	6	25	12	53	[["Metabolism", "Glycan Biosynthesis and Metabolism", "Lipopolysaccharide biosynthesis proteins"]]
K13641	8135	9493	9173	6840	7195	5471	6850	7147	5645	12760	8520	10869	9281	8004	11958	9451	10430	6517	[["Genetic Information Processing", "Transcription", "Transcription factors"]]
K13640	8305	11651	9700	7915	10386	8028	10991	9944	10203	13673	10317	12307	9973	10064	11265	10821	12266	7574	[["Genetic Information Processing", "Transcription", "Transcription factors"]]
K13643	5201	5009	5702	5254	6046	5179	4445	6151	5612	4149	5042	4545	5097	4024	5039	4920	4619	5294	[["Genetic Information Processing", "Transcription", "Transcription factors"]]
K13642	486	405	305	285	504	383	321	427	360	292	342	360	359	434	628	328	288	251	[["Genetic Information Processing", "Transcription", "Transcription factors"]]
K02027	58546	69308	66407	56524	57017	45343	51162	52818	45231	75060	63035	68237	69328	62749	72121	77456	69087	60757	[["Environmental Information Processing", "Membrane Transport", "Transporters"]]
K02026	62770	75069	72100	73390	61174	51232	54807	56201	48267	81513	71900	73919	74185	69824	78684	85203	73827	69440	[["Environmental Information Processing", "Membrane Transport", "Transporters"]]
K02025	62876	75693	72488	75200	61599	51439	54897	56132	48109	81905	72528	73760	74698	70541	79040	86098	74393	70364	[["Environmental Information Processing", "Membrane Transport", "Transporters"]]
K02024	1187	1182	1626	1280	1139	871	925	1391	1648	1436	1169	705	619	867	857	855	874	1655	[["Unclassified", "Cellular Processes and Signaling", "Pores ion channels"]]
K02023	17769	19882	21801	14796	20828	16756	17820	19683	17963	19033	19153	20835	22689	21853	22431	20878	19061	19413	[["Environmental Information Processing", "Membrane Transport", "Transporters"]]
K02022	14313	14850	15898	12688	16704	13061	13770	15538	14339	14987	15801	16247	17432	16177	16932	15472	15039	15901	[["Unclassified", "Cellular Processes and Signaling", "Membrane and intracellular structural molecules"]]
K02021	3978	4637	4418	2432	3725	2679	3076	3421	2712	5516	3714	5077	4846	4007	5430	4808	4890	3637	[["Environmental Information Processing", "Membrane Transport", "Transporters"]]
K02020	21214	24863	23786	20550	26216	20363	23229	24402	24268	26795	24998	26418	25293	23765	25478	24263	25695	21800	[["Environmental Information Processing", "Membrane Transport", "ABC transporters"], ["Environmental Information Processing", "Membrane Transport", "Transporters"]]
K02029	30762	34473	35072	29408	32493	27540	27436	31212	27859	34032	34965	34095	35848	36115	37030	34985	33134	33904	[["Environmental Information Processing", "Membrane Transport", "Transporters"]]
K02028	18642	19791	20309	15829	18323	15391	15394	17672	15605	20873	19710	19924	20555	20934	20907	20630	19888	20176	[["Environmental Information Processing", "Membrane Transport", "Transporters"]]
K03886	1492	1731	1859	923	1701	1159	1851	2384	2322	1269	832	1243	939	557	898	1312	1377	793	[["Metabolism", "Energy Metabolism", "Oxidative phosphorylation"]]
K03887	730	685	719	559	756	788	599	686	608	757	556	971	646	347	367	632	1549	609	[["Metabolism", "Energy Metabolism", "Oxidative phosphorylation"]]
K03884	0	0	0	0	0	0	0	0	0	0	0	0	0	0	0	0	0	0	[["None"]]
K03885	22573	27503	26017	21130	26942	21530	25268	25816	25133	30442	25603	29404	28046	24622	28092	27969	27905	22252	[["Metabolism", "Energy Metabolism", "Oxidative phosphorylation"]]
K03881	0	0	0	0	0	0	0	0	0	0	0	0	0	0	0	0	0	0	[["None"]]
K03888	48	61	87	25	36	30	22	31	20	51	44	61	187	74	142	80	60	33	[["Metabolism", "Energy Metabolism", "Oxidative phosphorylation"]]
K03889	2644	3461	2915	1698	2231	1694	1946	2067	1804	3125	2953	3243	3243	2820	3472	4110	3253	2225	[["Metabolism", "Energy Metabolism", "Oxidative phosphorylation"]]
K12998	0	0	8	0	0	0	0	0	0	0	0	0	0	0	0	0	0	0	[["Metabolism", "Glycan Biosynthesis and Metabolism", "Glycosyltransferases"], ["Metabolism", "Glycan Biosynthesis and Metabolism", "Lipopolysaccharide biosynthesis proteins"]]
K12999	26	32	4	22	10	0	11	6	4	3	8	27	14	31	70	43	12	6	[["Metabolism", "Glycan Biosynthesis and Metabolism", "Glycosyltransferases"], ["Metabolism", "Glycan Biosynthesis and Metabolism", "Lipopolysaccharide biosynthesis proteins"]]
K12992	375	282	271	616	484	520	237	268	425	348	807	532	458	773	605	667	373	413	[["Metabolism", "Glycan Biosynthesis and Metabolism", "Glycosyltransferases"], ["Metabolism", "Glycan Biosynthesis and Metabolism", "Lipopolysaccharide biosynthesis proteins"]]
K12993	26	26	57	12	47	40	2	10	9	21	53	13	24	47	22	12	16	141	[["Metabolism", "Glycan Biosynthesis and Metabolism", "Glycosyltransferases"], ["Metabolism", "Glycan Biosynthesis and Metabolism", "Lipopolysaccharide biosynthesis proteins"]]
K12990	1761	2007	1866	2145	3586	2634	1652	1799	1674	2228	2218	2713	5225	2656	3407	3564	2929	2184	[["Metabolism", "Glycan Biosynthesis and Metabolism", "Glycosyltransferases"], ["Metabolism", "Glycan Biosynthesis and Metabolism", "Lipopolysaccharide biosynthesis proteins"]]
K12991	42	84	89	21	55	85	2	8	48	30	568	26	77	640	47	35	93	199	[["Metabolism", "Glycan Biosynthesis and Metabolism", "Glycosyltransferases"], ["Metabolism", "Glycan Biosynthesis and Metabolism", "Lipopolysaccharide biosynthesis proteins"]]
K12996	27	33	12	55	10	4	11	7	4	55	36	31	14	31	23	45	12	51	[["Metabolism", "Glycan Biosynthesis and Metabolism", "Glycosyltransferases"], ["Metabolism", "Glycan Biosynthesis and Metabolism", "Lipopolysaccharide biosynthesis proteins"]]
K12997	133	83	27	88	74	228	26	30	54	130	130	20	48	56	34	214	71	113	[["Metabolism", "Glycan Biosynthesis and Metabolism", "Glycosyltransferases"], ["Metabolism", "Glycan Biosynthesis and Metabolism", "Lipopolysaccharide biosynthesis proteins"]]
K12994	122	96	149	41	117	103	23	41	32	87	105	81	103	99	127	42	91	215	[["Metabolism", "Glycan Biosynthesis and Metabolism", "Glycosyltransferases"], ["Metabolism", "Glycan Biosynthesis and Metabolism", "Lipopolysaccharide biosynthesis proteins"]]
K12995	122	66	105	31	90	107	49	19	49	159	67	55	35	144	44	64	53	255	[["Metabolism", "Glycan Biosynthesis and Metabolism", "Glycosyltransferases"], ["Metabolism", "Glycan Biosynthesis and Metabolism", "Lipopolysaccharide biosynthesis proteins"]]
K08979	0	0	0	0	0	0	0	0	0	0	0	0	0	0	0	0	0	0	[["Unclassified", "Poorly Characterized", "Function unknown"]]
K08978	5961	7818	7326	7421	9003	8545	9535	9025	9509	10238	7853	8524	7215	8325	8010	7863	8321	6771	[["Unclassified", "Poorly Characterized", "Function unknown"]]
K03088	320924	385665	373356	289222	409457	315719	386651	397044	404381	435821	334849	398185	374065	327939	379282	373373	387456	296543	[["Genetic Information Processing", "Transcription", "Transcription machinery"]]
K03089	13733	14616	15243	12499	17325	13277	13975	16554	15943	13244	13813	15311	16049	13928	15394	14062	13907	13114	[["Genetic Information Processing", "Transcription", "Transcription machinery"]]
K03086	32445	35983	34562	29685	35731	31081	31613	35216	33793	39408	32455	36834	35780	33065	35873	35080	36926	31404	[["Genetic Information Processing", "Transcription", "Transcription machinery"]]
K03087	3069	2886	3250	3722	2723	2092	2548	3120	2871	2840	3960	2331	2452	2130	2185	2960	2779	4120	[["Genetic Information Processing", "Transcription", "Transcription machinery"], ["Human Diseases", "Infectious Diseases", "Vibrio cholerae pathogenic cycle"]]
K08971	0	0	0	0	0	0	0	0	0	0	0	0	0	0	0	0	0	0	[["Unclassified", "Poorly Characterized", "Function unknown"]]
K08970	1322	1451	1570	1176	1358	1131	1397	1541	1255	1776	1477	1711	1972	1778	1805	1385	1549	1439	[["Unclassified", "Cellular Processes and Signaling", "Other ion-coupled transporters"]]
K03082	2768	4917	4080	3579	5480	4090	6685	5481	6315	5795	4151	5163	3868	4574	4166	3913	4778	2954	[["Metabolism", "Carbohydrate Metabolism", "Pentose and glucuronate interconversions"]]
K03080	3	19	5	148	9	18	9	1	9	151	48	1	7	84	14	2	25	101	[["Metabolism", "Carbohydrate Metabolism", "Pentose and glucuronate interconversions"]]
K08974	1045	998	950	3035	975	1982	861	951	1182	869	1622	743	811	1171	1092	1086	789	1921	[["Unclassified", "Poorly Characterized", "Function unknown"]]
K13868	0	0	0	0	0	0	0	0	0	0	0	0	0	0	0	0	0	0	[["None"]]
K00918	148	102	145	293	81	98	135	37	114	145	221	52	267	232	206	107	150	225	[["Metabolism", "Carbohydrate Metabolism", "Glycolysis / Gluconeogenesis"]]
K01553	0	0	0	0	0	0	0	0	0	0	0	0	0	0	0	0	0	0	[["Metabolism", "Nucleotide Metabolism", "Purine metabolism"]]
K12214	96	70	66	36	59	90	68	108	81	20	47	51	46	6	43	46	176	126	[["Environmental Information Processing", "Membrane Transport", "Secretion system"]]
K11646	128	79	85	96	118	76	126	151	164	156	156	147	96	61	156	120	131	63	[["Metabolism", "Amino Acid Metabolism", "Phenylalanine, tyrosine and tryptophan biosynthesis"]]
K11645	0	0	0	0	0	0	0	0	0	0	0	0	0	0	0	0	0	0	[["Metabolism", "Amino Acid Metabolism", "Phenylalanine, tyrosine and tryptophan biosynthesis"]]
K11641	4	7	1	3	2	1	2	1	3	6	4	3	7	4	9	8	11	5	[["Environmental Information Processing", "Signal Transduction", "Two-component system"]]
K11640	4	7	1	3	2	1	2	1	3	6	4	3	7	4	9	8	11	5	[["Metabolism", "Enzyme Families", "Protein kinases"], ["Environmental Information Processing", "Signal Transduction", "Two-component system"]]
K12736	0	0	0	0	0	0	0	0	0	0	0	0	0	0	0	0	0	0	[["None"]]
K12733	0	0	0	0	0	0	0	0	0	0	0	0	0	0	0	0	0	0	[["Genetic Information Processing", "Folding, Sorting and Degradation", "Chaperones and folding catalysts"], ["Genetic Information Processing", "Transcription", "Spliceosome"]]
K07507	13896	16327	16210	15502	18683	16341	17763	17450	18456	18527	17094	18825	17200	17366	17165	16847	16870	15266	[["Unclassified", "Cellular Processes and Signaling", "Other transporters"]]
K07506	12866	17370	16165	14188	21152	17303	21110	19739	21657	23032	17655	21759	18258	19161	20588	18422	18342	15345	[["Genetic Information Processing", "Transcription", "Transcription factors"]]
K07505	67	68	70	43	51	30	65	51	46	49	66	48	52	93	63	56	40	69	[["Unclassified", "Genetic Information Processing", "Others"]]
K07504	558	429	656	261	348	307	307	494	432	438	330	286	278	359	241	341	284	371	[["Unclassified", "Genetic Information Processing", "Others"]]
K07503	3748	4553	3969	2166	3126	2130	2903	2818	2247	5420	3682	4509	4592	3663	5084	4932	4747	2934	[["Unclassified", "Genetic Information Processing", "Others"]]
K07502	2492	2559	2673	2726	3850	3143	2322	2851	2660	2942	2774	3485	3555	2562	2155	3033	4091	2556	[["Unclassified", "Genetic Information Processing", "Others"]]
K07501	2256	2481	2206	1946	2471	1790	2203	2743	2883	1899	1973	1551	1617	1736	2299	1745	2001	2074	[["Unclassified", "Genetic Information Processing", "Others"]]
K07500	0	0	0	0	0	0	0	0	0	0	0	0	0	0	0	0	0	0	[["Unclassified", "Genetic Information Processing", "Others"]]
K07509	0	0	0	0	0	0	0	0	0	0	0	0	0	0	0	0	0	0	[["Metabolism", "Xenobiotics Biodegradation and Metabolism", "Benzoate degradation"], ["Metabolism", "Lipid Metabolism", "Fatty acid elongation in mitochondria"], ["Metabolism", "Lipid Metabolism", "Fatty acid metabolism"], ["Metabolism", "Amino Acid Metabolism", "Valine, leucine and isoleucine degradation"]]
K07508	581	552	716	436	770	440	632	869	997	461	239	316	243	180	390	317	355	301	[["Metabolism", "Xenobiotics Biodegradation and Metabolism", "Benzoate degradation"], ["Metabolism", "Lipid Metabolism", "Fatty acid elongation in mitochondria"], ["Metabolism", "Lipid Metabolism", "Fatty acid metabolism"], ["Metabolism", "Amino Acid Metabolism", "Valine, leucine and isoleucine degradation"]]
K11422	0	0	0	0	0	0	0	0	0	0	0	0	0	0	0	0	0	0	[["None"]]
K08698	16	0	10	0	0	0	12	0	0	52	26	0	2	36	0	26	4	284	[["Unclassified", "Metabolism", "Carbohydrate metabolism"]]
K10773	23582	26423	25147	23763	28181	23961	25040	26864	26632	29304	26351	27772	27036	25588	27010	25919	27123	24385	[["Genetic Information Processing", "Replication and Repair", "Base excision repair"], ["Genetic Information Processing", "Replication and Repair", "DNA repair and recombination proteins"]]
K10774	80	30	32	13	27	34	12	21	0	19	23	36	18	10	23	58	18	11	[["Metabolism", "Biosynthesis of Other Secondary Metabolites", "Phenylpropanoid biosynthesis"], ["Metabolism", "Energy Metabolism", "Nitrogen metabolism"]]
K14286	16	28	17	5	12	14	4	11	10	18	17	20	28	72	21	10	9	38	[["None"]]
K10778	10444	12995	12356	11122	14931	11160	14250	13959	15015	13961	13013	13937	13404	13323	13854	12131	12176	10932	[["Genetic Information Processing", "Transcription", "Transcription factors"], ["Genetic Information Processing", "Replication and Repair", "DNA repair and recombination proteins"]]
K14287	3367	3352	3764	2670	4660	3453	2923	3446	3332	3563	3434	3678	5404	3134	3465	3990	4124	3843	[["Metabolism", "Amino Acid Metabolism", "Amino acid related enzymes"]]
K00140	32379	37479	36958	24885	37124	28088	33222	36153	35641	38417	33404	39154	38220	33728	37229	36053	35675	32446	[["Metabolism", "Carbohydrate Metabolism", "Propanoate metabolism"], ["Metabolism", "Carbohydrate Metabolism", "Inositol phosphate metabolism"], ["Metabolism", "Amino Acid Metabolism", "Valine, leucine and isoleucine degradation"]]
K05501	1928	1809	2029	2630	1891	1636	1554	1943	2057	1698	2450	1541	1410	1385	1456	1648	1760	2035	[["Genetic Information Processing", "Transcription", "Transcription factors"], ["Genetic Information Processing", "Replication and Repair", "Chromosome"]]
K01903	19636	22819	21972	17431	23642	18118	21394	22286	22174	24495	21213	23962	23429	21298	23724	22245	22343	18773	[["Metabolism", "Carbohydrate Metabolism", "Propanoate metabolism"], ["Metabolism", "Carbohydrate Metabolism", "Citrate cycle (TCA cycle)"], ["Metabolism", "Energy Metabolism", "Carbon fixation pathways in prokaryotes"], ["Metabolism", "Carbohydrate Metabolism", "C5-Branched dibasic acid metabolism"]]
K01902	19632	22822	21971	17470	23645	18119	21410	22292	22173	24481	21246	23953	23427	21291	23734	22240	22343	18778	[["Metabolism", "Carbohydrate Metabolism", "Propanoate metabolism"], ["Metabolism", "Carbohydrate Metabolism", "Citrate cycle (TCA cycle)"], ["Metabolism", "Energy Metabolism", "Carbon fixation pathways in prokaryotes"], ["Metabolism", "Carbohydrate Metabolism", "C5-Branched dibasic acid metabolism"]]
K01905	419	625	529	338	453	421	420	669	632	527	286	598	250	284	237	385	699	208	[["Metabolism", "Carbohydrate Metabolism", "Propanoate metabolism"], ["Metabolism", "Carbohydrate Metabolism", "Glycolysis / Gluconeogenesis"], ["Metabolism", "Carbohydrate Metabolism", "Pyruvate metabolism"], ["Metabolism", "Lipid Metabolism", "Lipid biosynthesis proteins"]]
K01904	198	193	104	56	102	90	17	41	57	61	110	100	186	176	262	180	68	76	[["Metabolism", "Biosynthesis of Other Secondary Metabolites", "Phenylpropanoid biosynthesis"], ["Metabolism", "Amino Acid Metabolism", "Phenylalanine metabolism"], ["Metabolism", "Metabolism of Cofactors and Vitamins", "Ubiquinone and other terpenoid-quinone biosynthesis"]]
K01907	6716	8117	7996	5030	7213	5587	6762	7402	6794	8389	6391	7976	7194	6124	8016	8048	8066	5245	[["Metabolism", "Carbohydrate Metabolism", "Butanoate metabolism"], ["Metabolism", "Lipid Metabolism", "Lipid biosynthesis proteins"]]
K01906	2520	2524	2718	1807	2778	2537	1990	2991	2466	2453	1876	2769	2546	1931	2248	2498	3343	2366	[["Metabolism", "Metabolism of Cofactors and Vitamins", "Biotin metabolism"]]
K01909	22	50	46	49	51	31	20	36	32	78	205	62	65	114	118	54	83	80	[["Metabolism", "Lipid Metabolism", "Fatty acid metabolism"]]
K01908	6804	7009	7596	5350	8918	6912	6362	7618	6940	6979	7253	7918	9506	6971	8372	8129	7557	6390	[["Metabolism", "Carbohydrate Metabolism", "Propanoate metabolism"], ["Metabolism", "Lipid Metabolism", "Lipid biosynthesis proteins"]]
K14534	1366	1712	1744	2136	1588	1516	1470	2043	2153	1540	1486	1468	874	1025	917	1316	1952	1049	[["Metabolism", "Energy Metabolism", "Carbon fixation pathways in prokaryotes"], ["Metabolism", "Carbohydrate Metabolism", "Butanoate metabolism"]]
K00147	18079	19486	19199	16824	19676	16617	16049	18859	17722	19351	18612	19662	20789	17635	19048	19454	19834	18897	[["Metabolism", "Amino Acid Metabolism", "Arginine and proline metabolism"]]
K07767	0	0	0	0	0	0	0	0	0	0	0	0	0	0	0	0	0	0	[["Unclassified", "Metabolism", "Energy metabolism"]]
K07769	16	0	10	0	0	0	12	0	0	52	26	0	2	36	0	26	4	284	[["Metabolism", "Enzyme Families", "Protein kinases"], ["Environmental Information Processing", "Signal Transduction", "Two-component system"]]
K07768	4109	5064	4365	2431	3373	2387	3117	3160	2499	5636	4007	4963	4787	3969	5435	5170	5016	3274	[["Metabolism", "Enzyme Families", "Protein kinases"], ["Environmental Information Processing", "Signal Transduction", "Two-component system"]]
K06203	3877	4557	4528	4400	4045	3326	3558	4563	3959	4176	4324	4004	4503	3426	3779	5008	4779	4000	[["Unclassified", "Metabolism", "Amino acid metabolism"]]
K06202	5291	7025	6725	6436	8203	6505	8769	8122	9071	8720	7289	7612	5922	6562	7030	6341	7144	5344	[["Unclassified", "Cellular Processes and Signaling", "Inorganic ion transport and metabolism"]]
K09921	4681	4529	5053	4839	6146	4477	3844	4844	4478	4298	5216	5083	7097	4282	4819	4829	5051	5148	[["Unclassified", "Poorly Characterized", "Function unknown"]]
K09920	1213	1332	1377	1504	2775	1895	1120	1257	1144	1632	1672	1967	3635	1900	2128	2087	2059	1763	[["Unclassified", "Poorly Characterized", "Function unknown"]]
K09927	5782	6743	6579	3931	5332	3822	4679	5192	4214	7622	5721	6734	7504	5504	7314	6845	6628	5487	[["Unclassified", "Poorly Characterized", "Function unknown"]]
K09024	1441	1524	1509	1170	1403	1243	1427	1622	1404	1637	1513	1713	1423	1562	1587	1459	1542	1464	[["Unclassified", "Poorly Characterized", "General function prediction only"]]
K09022	174	157	51	1693	162	129	65	80	107	411	980	38	123	368	118	254	225	442	[["Unclassified", "Genetic Information Processing", "Others"]]
K09023	467	409	336	355	419	329	265	325	345	432	376	372	401	387	501	336	327	521	[["Unclassified", "Poorly Characterized", "General function prediction only"]]
K09020	2450	3419	3389	2432	3255	2071	3107	3153	3593	3114	2784	3485	3761	2713	2630	3133	2673	3687	[["Unclassified", "Metabolism", "Biosynthesis and biodegradation of secondary metabolites"]]
K09021	723	691	635	700	922	584	703	842	1032	684	484	493	518	431	658	450	534	695	[["Unclassified", "Genetic Information Processing", "Others"]]
K02908	0	0	0	0	0	0	0	0	0	0	0	0	0	0	0	0	0	0	[["Genetic Information Processing", "Translation", "Ribosome"]]
K02909	23156	26654	25038	23853	27096	22844	24314	25560	25144	28448	26246	27038	27176	25249	26589	26646	27042	23733	[["Genetic Information Processing", "Translation", "Ribosome"]]
K08218	13470	12921	13221	12391	15073	13979	12036	13984	13871	12548	12488	13437	14247	13509	13151	12541	13170	13218	[["Environmental Information Processing", "Membrane Transport", "Transporters"]]
K08219	3	23	7	152	9	18	10	1	10	152	50	1	8	86	14	2	25	101	[["Environmental Information Processing", "Membrane Transport", "Transporters"]]
K02904	21885	24965	23564	21559	25990	22154	23087	24601	24335	26581	24093	25628	25488	24209	24931	24319	25441	22621	[["Genetic Information Processing", "Translation", "Ribosome"]]
K02906	22011	25098	23659	21607	26045	22192	23194	24660	24400	26780	24157	25757	25631	24250	25025	24410	25521	22743	[["Genetic Information Processing", "Translation", "Ribosome"]]
K02907	21055	23732	22896	19934	25005	21161	22312	23604	23497	25834	22724	24677	25049	23334	24472	23560	23773	21210	[["Genetic Information Processing", "Translation", "Ribosome"]]
K02902	22344	25793	24199	21902	26411	22348	23642	25062	24712	27161	24754	26213	26262	24378	25393	25354	25971	23023	[["Genetic Information Processing", "Translation", "Ribosome"]]
K00230	641	612	592	2337	353	465	200	266	293	1020	1674	587	710	1045	766	491	551	1119	[["Metabolism", "Metabolism of Cofactors and Vitamins", "Porphyrin and chlorophyll metabolism"]]
K00231	9673	12602	10902	8526	11682	9269	11943	11072	11198	15078	11011	13498	12153	11432	12826	12254	13724	8747	[["Metabolism", "Metabolism of Cofactors and Vitamins", "Porphyrin and chlorophyll metabolism"]]
K00232	1603	2173	1771	974	1335	785	1241	1179	930	1941	1860	1674	2097	1418	1841	2589	1852	1366	[["Organismal Systems", "Endocrine System", "PPAR signaling pathway"], ["Cellular Processes", "Transport and Catabolism", "Peroxisome"], ["Metabolism", "Lipid Metabolism", "Fatty acid metabolism"], ["Metabolism", "Lipid Metabolism", "Biosynthesis of unsaturated fatty acids"], ["Metabolism", "Lipid Metabolism", "alpha-Linolenic acid metabolism"]]
K08976	4548	6468	5920	4707	7671	5713	8449	7739	8651	8012	5669	6951	5540	5709	6086	5744	6411	4337	[["Unclassified", "Poorly Characterized", "Function unknown"]]
K00234	0	0	0	0	0	0	0	0	0	0	0	0	0	0	0	0	0	0	[["None"]]
K00239	24868	28488	27132	22013	28752	23237	25590	26995	26071	31786	26403	30027	30453	26385	30360	28981	29701	23996	[["Metabolism", "Xenobiotics Biodegradation and Metabolism", "Toluene degradation"], ["Metabolism", "Carbohydrate Metabolism", "Citrate cycle (TCA cycle)"], ["Metabolism", "Energy Metabolism", "Carbon fixation pathways in prokaryotes"], ["Metabolism", "Energy Metabolism", "Oxidative phosphorylation"], ["Metabolism", "Carbohydrate Metabolism", "Butanoate metabolism"]]
K06209	355	310	260	1390	464	518	209	197	224	606	887	257	422	957	430	553	442	865	[["Metabolism", "Amino Acid Metabolism", "Phenylalanine, tyrosine and tryptophan biosynthesis"]]
K09928	7224	8768	8475	6988	9648	7779	9636	9745	10301	10164	8990	10229	9120	9346	8836	8471	8477	8228	[["Unclassified", "Poorly Characterized", "Function unknown"]]
K01015	1	0	0	1	0	1	2	0	0	0	0	2	0	0	0	0	0	4	[["Metabolism", "Energy Metabolism", "Sulfur metabolism"], ["Metabolism", "Lipid Metabolism", "Steroid hormone biosynthesis"]]
K01014	1196	1142	1458	903	1588	914	1312	1809	2039	936	514	654	495	386	790	630	730	600	[["Metabolism", "Energy Metabolism", "Sulfur metabolism"]]
K01012	18651	19733	19378	18646	20665	17753	15940	19276	18304	19729	19884	20098	20814	18451	19573	20212	21408	19659	[["Metabolism", "Metabolism of Cofactors and Vitamins", "Biotin metabolism"]]
K01011	45018	51655	49835	37936	50585	38992	43313	48118	43886	52723	48460	52990	55556	45928	54046	53495	52315	42772	[["Metabolism", "Amino Acid Metabolism", "Cysteine and methionine metabolism"], ["Genetic Information Processing", "Folding, Sorting and Degradation", "Sulfur relay system"]]
K01010	0	0	0	0	0	0	0	0	0	0	0	0	0	0	0	0	0	0	[["None"]]
K08920	0	0	0	0	0	0	0	0	0	0	0	0	0	0	0	0	0	0	[["Metabolism", "Energy Metabolism", "Photosynthesis proteins"]]
K14103	0	0	0	0	0	0	0	0	0	0	0	0	0	0	0	0	0	0	[["Metabolism", "Energy Metabolism", "Methane metabolism"]]
K14102	0	0	0	0	0	0	0	0	0	0	0	0	0	0	0	0	0	0	[["Metabolism", "Energy Metabolism", "Methane metabolism"]]
K14101	0	0	0	0	0	0	0	0	0	0	0	0	0	0	0	0	0	0	[["Metabolism", "Energy Metabolism", "Methane metabolism"]]
K14100	0	0	0	0	0	0	0	0	0	0	0	0	0	0	0	0	0	0	[["Metabolism", "Energy Metabolism", "Methane metabolism"]]
K14105	0	0	0	0	0	0	0	0	0	0	0	0	0	0	0	0	0	0	[["Metabolism", "Energy Metabolism", "Methane metabolism"]]
K14104	0	0	0	0	0	0	0	0	0	0	0	0	0	0	0	0	0	0	[["Metabolism", "Energy Metabolism", "Methane metabolism"]]
K14109	0	0	1	0	0	2	0	0	1	0	0	2	0	0	0	0	0	0	[["Metabolism", "Energy Metabolism", "Methane metabolism"]]
K14108	0	0	0	0	0	0	0	0	0	0	0	0	0	0	0	0	0	0	[["Metabolism", "Energy Metabolism", "Methane metabolism"]]
K06401	17	22	24	5	7	8	6	2	3	12	7	10	140	32	50	17	22	14	[["Unclassified", "Cellular Processes and Signaling", "Sporulation"]]
K00893	0	0	0	0	0	0	0	0	0	0	0	0	0	0	0	0	0	0	[["Metabolism", "Nucleotide Metabolism", "Pyrimidine metabolism"], ["Metabolism", "Nucleotide Metabolism", "Purine metabolism"]]
K13402	0	0	0	0	0	0	0	0	0	0	0	0	0	0	0	0	0	0	[["None"]]
K12858	0	0	0	0	0	0	0	0	0	0	0	0	0	0	0	2	0	0	[["None"]]
K03503	3799	3664	3935	4460	3434	3834	3347	3733	3325	3730	4109	3304	2920	2731	3073	3303	3675	3830	[["Metabolism", "Enzyme Families", "Peptidases"], ["Genetic Information Processing", "Replication and Repair", "DNA repair and recombination proteins"]]
K03502	4831	4435	4673	6315	4517	5360	3846	4757	4331	4679	5018	3856	4214	4004	3683	4567	4564	5483	[["Genetic Information Processing", "Replication and Repair", "DNA repair and recombination proteins"]]
K03501	21971	24991	23615	21571	25989	22146	23153	24593	24353	26671	24129	25724	25601	24222	24985	24386	25480	22446	[["Genetic Information Processing", "Replication and Repair", "Chromosome"], ["Genetic Information Processing", "Translation", "Ribosome Biogenesis"]]
K03500	26499	29863	29589	24054	32150	25530	28374	31224	30568	31028	28055	31150	30772	27271	30677	29049	30373	26126	[["Genetic Information Processing", "Translation", "Ribosome Biogenesis"]]
K08924	0	0	0	0	0	0	0	0	0	0	0	0	0	0	0	0	0	0	[["Metabolism", "Energy Metabolism", "Photosynthesis proteins"]]
K02278	6805	7884	7840	6325	9288	7291	8049	8171	8658	8163	8155	8699	8639	8686	8816	7867	7193	7397	[["Environmental Information Processing", "Membrane Transport", "Secretion system"], ["Cellular Processes", "Cell Motility", "Bacterial motility proteins"]]
K02279	9947	11397	11087	8410	11882	9472	10852	11017	11157	12800	11177	12657	12132	11552	12606	11125	11123	10060	[["Environmental Information Processing", "Membrane Transport", "Secretion system"], ["Cellular Processes", "Cell Motility", "Bacterial motility proteins"]]
K12977	16	392	1	388	15	16	78	30	44	12	418	2	23	386	172	37	129	80	[["Metabolism", "Glycan Biosynthesis and Metabolism", "Lipopolysaccharide biosynthesis proteins"]]
K02276	27206	34541	32565	23987	37909	28473	37064	36259	37681	38715	31042	37075	33870	31819	34619	32716	34383	27235	[["Metabolism", "Energy Metabolism", "Oxidative phosphorylation"]]
K02277	28	42	35	63	23	15	26	17	9	22	57	17	149	37	75	50	66	29	[["Metabolism", "Energy Metabolism", "Oxidative phosphorylation"]]
K02274	30462	37273	34780	24840	39200	28911	36546	36590	36869	40890	33714	39861	37929	34068	38941	36423	37179	28600	[["Metabolism", "Energy Metabolism", "Oxidative phosphorylation"]]
K02275	27834	35147	32850	24292	38373	28935	37071	36286	37680	39108	32074	38080	35500	33511	36443	33642	35054	27442	[["Metabolism", "Energy Metabolism", "Oxidative phosphorylation"]]
K13450	0	0	0	0	0	0	0	0	0	0	0	0	0	0	0	0	0	3	[["Organismal Systems", "Environmental Adaptation", "Plant-pathogen interaction"], ["Human Diseases", "Infectious Diseases", "Shigellosis"]]
K13451	0	0	0	0	0	0	0	0	0	0	0	0	0	0	0	0	0	0	[["Organismal Systems", "Environmental Adaptation", "Plant-pathogen interaction"]]
K13452	0	0	0	0	0	0	0	0	0	0	0	0	0	0	0	0	0	0	[["Organismal Systems", "Environmental Adaptation", "Plant-pathogen interaction"]]
K13454	0	0	0	0	0	0	0	0	0	0	0	0	0	0	0	0	0	0	[["Organismal Systems", "Environmental Adaptation", "Plant-pathogen interaction"]]
K13455	0	0	0	0	0	0	0	0	0	0	0	0	0	0	0	0	0	0	[["Organismal Systems", "Environmental Adaptation", "Plant-pathogen interaction"]]
K12509	0	0	0	0	0	0	0	0	0	0	0	0	0	0	0	0	0	0	[["Environmental Information Processing", "Membrane Transport", "Secretion system"]]
K12508	3547	3138	3531	2211	3622	2601	3190	3589	3444	3121	2774	3201	2905	2661	3245	2798	3032	2565	[["Unclassified", "Metabolism", "Lipid metabolism"]]
K12507	102	69	81	113	96	303	50	50	44	72	138	208	211	124	121	121	52	166	[["Metabolism", "Lipid Metabolism", "Lipid biosynthesis proteins"]]
K12506	12888	15020	13698	11049	14139	11425	12608	13998	13596	12358	13755	14962	14547	15256	14343	13185	12835	12455	[["Metabolism", "Metabolism of Terpenoids and Polyketides", "Terpenoid backbone biosynthesis"]]
K12500	94	80	64	1582	75	83	45	29	58	216	866	40	121	343	547	63	86	223	[["Metabolism", "Lipid Metabolism", "Lipid biosynthesis proteins"]]
K12503	2780	3610	3079	1672	2227	1527	2020	2067	1741	3304	2851	3129	3296	2829	3424	3953	3269	2235	[["Metabolism", "Metabolism of Terpenoids and Polyketides", "Prenyltransferases"], ["Metabolism", "Metabolism of Terpenoids and Polyketides", "Terpenoid backbone biosynthesis"]]
K05926	0	0	0	0	0	0	0	0	0	0	0	0	0	0	0	0	0	0	[["Unclassified", "Metabolism", "Others"]]
K09728	0	0	0	0	0	0	0	0	0	0	0	0	0	0	0	0	0	0	[["Unclassified", "Poorly Characterized", "Function unknown"]]
K14587	0	0	0	0	1	21	1	0	0	0	18	0	0	16	0	14	0	0	[["Unclassified", "Metabolism", "Carbohydrate metabolism"]]
K06597	945	943	1034	1135	2103	1589	986	964	924	1218	1383	1741	2543	1482	1382	1628	1646	1287	[["Cellular Processes", "Cell Motility", "Bacterial motility proteins"], ["Environmental Information Processing", "Signal Transduction", "Two-component system"]]
K06596	4030	3815	4279	3559	5553	4245	3466	4165	3909	3940	4269	4634	5741	3413	3891	4332	5415	4811	[["Metabolism", "Enzyme Families", "Protein kinases"], ["Cellular Processes", "Cell Motility", "Bacterial motility proteins"], ["Environmental Information Processing", "Signal Transduction", "Two-component system"]]
K06595	48	57	84	23	32	23	22	30	20	52	42	58	184	76	141	71	53	24	[["Cellular Processes", "Cell Motility", "Bacterial motility proteins"]]
K06599	88	141	190	68	56	59	100	99	73	120	146	133	83	61	119	142	99	130	[["Genetic Information Processing", "Transcription", "Transcription factors"], ["Cellular Processes", "Cell Motility", "Bacterial motility proteins"]]
K06598	1481	1550	1532	1390	2846	1987	1373	1628	1417	1650	1812	2183	3889	1910	2260	2203	2280	2051	[["Cellular Processes", "Cell Motility", "Bacterial motility proteins"], ["Environmental Information Processing", "Signal Transduction", "Two-component system"]]
[truncated: 4,910 more rows]

## Sheet: cog_prediction
COG_ID	Ba.1	Ba.2	Ba.3	BmK.1	BmK.2	BmK.3	CK.1	CK.2	CK.3	OF.1	OF.2	OF.3	OFBa.1	OFBa.2	OFBa.3	OFBmK.1	OFBmK.2	OFBmK.3	COG_Category	COG_Description
COG0393	10611	13386	12194	9953	13877	10912	13375	13283	13146	14591	11406	13270	13943	12583	14108	13224	13063	10270	[["POORLY CHARACTERIZED", "[S] Function unknown"]]	Uncharacterized conserved protein
COG4055	0	0	0	0	0	0	0	0	0	0	0	0	0	0	0	0	0	0	[["METABOLISM", "[H] Coenzyme transport and metabolism"]]	Methyl coenzyme M reductase, subunit D
COG2043	2257	2370	2344	2285	2301	2154	2169	2648	2281	2505	2315	2937	1814	1659	1834	2063	3494	1685	[["POORLY CHARACTERIZED", "[S] Function unknown"]]	Uncharacterized protein conserved in archaea
COG3010	376	501	375	1363	500	570	311	294	373	712	1162	390	524	1347	545	646	547	1627	[["METABOLISM", "[G] Carbohydrate transport and metabolism"]]	Putative N-acetylmannosamine-6-phosphate epimerase
COG3011	5201	4609	4717	3633	5444	4490	4528	5498	5160	4251	4882	4591	4900	5116	4574	4651	5095	4060	[["POORLY CHARACTERIZED", "[S] Function unknown"]]	Uncharacterized protein conserved in bacteria
COG3012	8484	9169	9529	8228	9793	7714	7157	9245	8399	8637	8812	8607	10134	7272	8791	9509	9450	8402	[["POORLY CHARACTERIZED", "[S] Function unknown"]]	Uncharacterized protein conserved in bacteria
COG3013	474	554	387	1730	291	205	211	273	220	519	1215	347	488	742	654	402	470	556	[["POORLY CHARACTERIZED", "[S] Function unknown"]]	Uncharacterized conserved protein
COG3014	1543	1969	1928	1492	1668	1527	1198	2100	1881	1295	1407	1392	1728	1303	1290	1604	1516	2073	[["POORLY CHARACTERIZED", "[S] Function unknown"]]	Uncharacterized protein conserved in bacteria
COG3015	750	532	494	2490	396	1637	327	356	432	621	1494	434	634	765	461	632	610	1056	[["CELLULAR PROCESSES AND SIGNALING", "[M] Cell wall/membrane/envelope biogenesis"], ["METABOLISM", "[P] Inorganic ion transport and metabolism"]]	Uncharacterized lipoprotein NlpE involved in copper resistance
COG3016	1951	1985	2264	2838	2067	1517	1806	2340	2505	1679	2332	1802	1806	1202	1247	1609	1994	2027	[["POORLY CHARACTERIZED", "[S] Function unknown"]]	Uncharacterized iron-regulated protein
COG3017	3644	3441	3867	4147	5068	3891	3025	3781	3578	3449	4364	3924	5581	3541	4320	3953	4241	4194	[["CELLULAR PROCESSES AND SIGNALING", "[M] Cell wall/membrane/envelope biogenesis"]]	Outer membrane lipoprotein involved in outer membrane biogenesis
COG3018	727	1158	631	968	758	781	640	747	622	673	1013	973	497	773	393	715	1612	734	[["POORLY CHARACTERIZED", "[S] Function unknown"]]	Uncharacterized protein conserved in bacteria
COG3019	5606	5481	5518	5366	6386	5050	4823	5962	5604	4865	5505	5041	6272	4998	6372	5524	4978	4973	[["POORLY CHARACTERIZED", "[R] General function prediction only"]]	Predicted metal-binding protein
COG0390	4055	5630	4983	6150	6104	4750	6994	6035	6665	7040	6195	5905	4900	5672	5418	4964	5638	4326	[["POORLY CHARACTERIZED", "[R] General function prediction only"]]	ABC-type uncharacterized transport system, permease component
COG4718	239	182	184	4378	176	184	77	80	137	365	2429	118	210	508	263	184	221	576	[["POORLY CHARACTERIZED", "[S] Function unknown"]]	Phage-related protein
COG4719	345	409	320	193	358	307	139	276	239	246	278	256	701	286	411	340	246	389	[["POORLY CHARACTERIZED", "[S] Function unknown"]]	Uncharacterized protein conserved in bacteria
COG4716	1511	1420	1469	2484	1571	2034	1199	1376	1239	1520	2071	1600	1629	2108	2002	1929	1699	2271	[["POORLY CHARACTERIZED", "[S] Function unknown"]]	Myosin-crossreactive antigen
COG4717	2069	1930	1940	2131	2167	2018	1634	1919	1706	1991	2436	2323	1866	2157	1687	2221	2763	1987	[["POORLY CHARACTERIZED", "[S] Function unknown"]]	Uncharacterized conserved protein
COG4714	22	43	76	26	27	35	6	43	26	14	10	16	22	92	60	25	13	68	[["POORLY CHARACTERIZED", "[S] Function unknown"]]	Uncharacterized membrane-anchored protein conserved in bacteria
COG4715	688	394	495	786	382	309	257	286	247	572	832	495	400	420	528	631	355	345	[["POORLY CHARACTERIZED", "[S] Function unknown"]]	Uncharacterized conserved protein
COG4712	9	5	13	402	19	90	6	7	32	23	277	33	64	60	56	47	2	159	[["POORLY CHARACTERIZED", "[S] Function unknown"]]	Uncharacterized protein conserved in bacteria
COG4713	176	163	205	731	120	228	179	139	101	123	450	77	97	378	157	195	188	523	[["POORLY CHARACTERIZED", "[S] Function unknown"]]	Predicted membrane protein
COG4710	196	220	257	209	242	328	158	207	274	196	381	335	354	355	395	499	314	231	[["POORLY CHARACTERIZED", "[R] General function prediction only"]]	Predicted DNA-binding protein with an HTH domain
COG4711	135	132	160	189	212	366	153	223	276	128	308	315	255	401	369	512	275	250	[["POORLY CHARACTERIZED", "[S] Function unknown"]]	Predicted membrane protein
COG1874	21521	28130	25353	25089	31309	25811	31175	28046	30449	36913	28141	32198	27838	28885	29470	29609	29503	24151	[["METABOLISM", "[G] Carbohydrate transport and metabolism"]]	Beta-galactosidase
COG1875	7268	8146	7842	6634	7993	6278	5792	7074	6547	7431	8227	7900	9467	6733	7964	8935	8462	7170	[["CELLULAR PROCESSES AND SIGNALING", "[T] Signal transduction mechanisms"]]	Predicted ATPase related to phosphate starvation-inducible protein PhoH
COG1876	8567	8850	8656	9385	8174	7086	6589	7131	6000	12275	10074	9974	11088	9702	10488	9669	10204	9711	[["CELLULAR PROCESSES AND SIGNALING", "[M] Cell wall/membrane/envelope biogenesis"]]	D-alanyl-D-alanine carboxypeptidase
COG1877	11340	12965	12775	8734	12862	9624	10661	11862	11118	13123	11647	13905	13514	12014	13539	13091	12577	10307	[["METABOLISM", "[G] Carbohydrate transport and metabolism"]]	Trehalose-6-phosphatase
COG1871	9441	9932	10312	8871	11725	9279	8699	10957	10397	9282	9711	10532	11735	9261	9623	10217	9900	9887	[["CELLULAR PROCESSES AND SIGNALING", "[N] Cell motility"], ["CELLULAR PROCESSES AND SIGNALING", "[T] Signal transduction mechanisms"]]	Chemotaxis protein: stimulates methylation of MCP proteins
COG1872	14220	16889	16763	12515	18109	13970	17618	18823	18960	17154	14980	17466	15683	14592	15065	15628	16440	14090	[["POORLY CHARACTERIZED", "[S] Function unknown"]]	Uncharacterized conserved protein
COG1873	1812	1798	2073	2376	1698	1651	1684	1715	1576	2195	2378	1925	1813	2314	1872	1853	1977	2039	[["POORLY CHARACTERIZED", "[S] Function unknown"]]	Uncharacterized conserved protein
COG1675	393	433	459	224	364	272	401	519	381	375	236	262	184	139	164	396	410	222	[["INFORMATION STORAGE AND PROCESSING", "[K] Transcription"]]	Transcription initiation factor IIE, alpha subunit
COG2382	25959	34670	30963	28368	38589	29751	39197	36104	38762	39950	31318	35499	31966	30171	32284	31736	34615	23828	[["METABOLISM", "[P] Inorganic ion transport and metabolism"]]	Enterochelin esterase and related enzymes
COG0078	22533	25581	24318	23687	26553	22153	23091	24894	24569	27559	25649	26500	26417	24468	25762	25417	25961	23688	[["METABOLISM", "[E] Amino acid transport and metabolism"]]	Ornithine carbamoyltransferase
COG1878	22488	28116	26262	19920	25650	19272	24395	24947	24593	31059	25477	30171	28070	25325	30219	26897	27676	22203	[["POORLY CHARACTERIZED", "[R] General function prediction only"]]	Predicted metal-dependent hydrolase
COG1879	55874	66740	64532	56196	63473	50397	60105	60086	57556	78227	67190	69839	66607	68961	73124	66937	66698	54843	[["METABOLISM", "[G] Carbohydrate transport and metabolism"]]	ABC-type sugar transport system, periplasmic component
COG0391	12489	16330	14547	11481	14126	10591	14440	13645	13506	19515	14545	17026	15381	13994	17024	15969	16486	11504	[["POORLY CHARACTERIZED", "[S] Function unknown"]]	Uncharacterized conserved protein
COG2384	627	468	406	1773	603	866	392	299	378	939	1321	392	711	1342	552	810	627	1473	[["POORLY CHARACTERIZED", "[R] General function prediction only"]]	Predicted SAM-dependent methyltransferase
COG0723	25014	29944	28360	20037	30563	23304	28285	29591	29119	31643	26090	31356	28679	25113	29231	27967	30918	23354	[["METABOLISM", "[C] Energy production and conversion"]]	Rieske Fe-S protein
COG0722	10846	13061	12474	14682	15131	11327	13372	13578	13704	15235	14838	13247	14190	12409	12882	12944	13518	12086	[["METABOLISM", "[E] Amino acid transport and metabolism"]]	3-deoxy-D-arabino-heptulosonate 7-phosphate (DAHP) synthase
COG0721	19666	23162	21809	16845	22712	18094	21438	23054	22707	23940	20625	23270	21055	20376	22083	21281	22664	19723	[["INFORMATION STORAGE AND PROCESSING", "[J] Translation, ribosomal structure and biogenesis"]]	Asp-tRNAAsn/Glu-tRNAGln amidotransferase C subunit
COG0720	26241	32747	30924	26635	37260	29932	35717	36424	37783	35942	29737	34145	30650	29328	32196	30612	33727	25375	[["METABOLISM", "[H] Coenzyme transport and metabolism"]]	6-pyruvoyl-tetrahydropterin synthase
COG0727	8276	9042	8822	8971	10922	8459	7581	9343	8916	8466	10189	9314	11129	8956	8679	8885	9723	8931	[["POORLY CHARACTERIZED", "[R] General function prediction only"]]	Predicted Fe-S-cluster oxidoreductase
COG0726	75171	89223	86981	71701	91762	74456	85439	88729	87004	99070	83644	94093	89814	82110	90102	89243	92316	74729	[["METABOLISM", "[G] Carbohydrate transport and metabolism"]]	Predicted xylanase/chitin deacetylase
COG0725	22806	26423	25639	21748	27941	21695	24877	26309	26027	29279	26569	28115	26834	25009	27279	26169	27528	23389	[["METABOLISM", "[P] Inorganic ion transport and metabolism"]]	ABC-type molybdate transport system, periplasmic component
COG0724	9427	10384	10647	7969	10706	8217	9763	12099	12196	8815	7950	8418	6505	5931	6634	8217	9929	9095	[["POORLY CHARACTERIZED", "[R] General function prediction only"]]	RNA-binding proteins (RRM domain)
COG0729	10914	11414	11625	10024	13247	9931	10575	11891	11771	10738	12231	12515	13815	12276	11852	11273	10998	11831	[["CELLULAR PROCESSES AND SIGNALING", "[M] Cell wall/membrane/envelope biogenesis"]]	Outer membrane protein
COG0728	23470	28009	26148	21067	28019	21911	25457	27052	26016	29255	25600	28926	27821	24324	27091	27491	29287	22905	[["POORLY CHARACTERIZED", "[R] General function prediction only"]]	Uncharacterized membrane protein, putative virulence factor
COG4430	15024	18397	17065	12350	18694	13971	17394	17723	17500	20357	15898	18988	19900	16073	17671	18126	18196	15641	[["POORLY CHARACTERIZED", "[S] Function unknown"]]	Uncharacterized protein conserved in bacteria
COG4168	93	75	47	1567	57	70	28	27	58	183	843	33	81	245	88	62	88	272	[["CELLULAR PROCESSES AND SIGNALING", "[V] Defense mechanisms"]]	ABC-type antimicrobial peptide transport system, permease component
COG1599	0	0	0	0	0	0	0	0	0	0	0	0	0	0	0	0	0	0	[["INFORMATION STORAGE AND PROCESSING", "[L] Replication, recombination and repair"]]	Single-stranded DNA-binding replication protein A (RPA), large (70 kD) subunit and related ssDNA-binding proteins
COG4056	0	0	0	0	0	0	0	0	0	0	0	0	0	0	0	0	0	0	[["METABOLISM", "[H] Coenzyme transport and metabolism"]]	Methyl coenzyme M reductase, subunit C
COG3708	2044	2081	2143	2524	1880	1845	1793	1624	1565	2136	2655	2097	2560	2518	2375	2583	2192	2724	[["POORLY CHARACTERIZED", "[S] Function unknown"]]	Uncharacterized protein conserved in bacteria
COG3709	2106	2163	2467	1648	2262	1794	1895	2204	1958	2246	2227	2332	2169	2315	2426	2101	2100	2024	[["METABOLISM", "[P] Inorganic ion transport and metabolism"]]	Uncharacterized component of phosphonate metabolism
COG3704	4471	4791	4816	3710	6099	4548	4214	4557	4454	4856	5109	5675	6490	5814	5171	4864	4687	6449	[["CELLULAR PROCESSES AND SIGNALING", "[U] Intracellular trafficking, secretion, and vesicular transport"]]	Type IV secretory pathway, VirB6 components
COG3705	8740	8801	9327	8124	9510	7461	8330	9631	9687	8396	9251	8831	8345	8829	8747	8249	7776	9445	[["METABOLISM", "[E] Amino acid transport and metabolism"]]	ATP phosphoribosyltransferase involved in histidine biosynthesis
COG3706	95579	110415	109860	84829	126534	97277	112598	121934	121840	120549	102691	120282	112971	99065	110278	106085	115579	95078	[["CELLULAR PROCESSES AND SIGNALING", "[T] Signal transduction mechanisms"]]	Response regulator containing a CheY-like receiver domain and a GGDEF domain
COG3707	19274	21784	21883	14643	18853	14672	16407	18321	16117	25238	20194	22624	21365	19451	23343	21847	21627	19366	[["CELLULAR PROCESSES AND SIGNALING", "[T] Signal transduction mechanisms"]]	Response regulator with putative antiterminator output domain
COG3700	93	74	48	1576	56	70	29	27	59	183	849	33	82	246	88	62	88	251	[["POORLY CHARACTERIZED", "[R] General function prediction only"]]	Acid phosphatase (class B)
COG3701	7545	10360	9902	8056	11832	9086	11948	10948	11838	11854	9775	11754	10451	10920	11567	10100	9875	8679	[["CELLULAR PROCESSES AND SIGNALING", "[U] Intracellular trafficking, secretion, and vesicular transport"]]	Type IV secretory pathway, TrbF components
COG3702	2795	3008	2930	1911	2872	2071	2388	2575	2843	2676	2944	3165	3265	3503	2633	2513	2266	3716	[["CELLULAR PROCESSES AND SIGNALING", "[U] Intracellular trafficking, secretion, and vesicular transport"]]	Type IV secretory pathway, VirB3 components
COG3703	4471	4767	5332	3585	5252	4113	4535	5414	4897	4259	4383	4831	4922	4610	5047	4529	4150	3814	[["METABOLISM", "[P] Inorganic ion transport and metabolism"]]	Uncharacterized protein involved in cation transport
COG1673	0	0	0	0	0	0	0	0	0	0	0	0	0	0	0	0	0	0	[["POORLY CHARACTERIZED", "[S] Function unknown"]]	Uncharacterized protein conserved in archaea
COG3085	93	75	47	1567	57	70	37	27	58	183	844	33	81	245	88	62	99	269	[["POORLY CHARACTERIZED", "[S] Function unknown"]]	Uncharacterized protein conserved in bacteria
[truncated: 4,728 more rows]
