# Supplementary material for: Bio-organic fertilizers improve Dendrocalamus farinosus growth by remolding the soil microbiome and metabolome
Source: Front Microbiol. 2023 Feb 15;14:1117355. doi: 10.3389/fmicb.2023.1117355 (PMC9975161; doi:10.3389/fmicb.2023.1117355)
Supplement: Supplementary file 4 [file Table_4.XLSX]

## Sheet: Table S5
Table S5. Detailed data for all soil metabolic pathway enriched following fertilization

## Sheet: Ba_Control
ID Annotation	Annotation	in set	set	in background	background	RichFactor	p-value	-lg(p-value)	FDR correction	Matching IDs	URL
ko00052	Galactose metabolism	2	10	46	6095	0.0434783	0.00241306	2.61743	0.0289567	C00492 C01697	https://www.genome.jp/kegg-bin/show_pathway?ko00052/ko:C00492%09blue/ko:C01697%09blue
ko05146	Amoebiasis	1	10	13	6095	0.0769231	0.0211409	1.67488	0.0960052	C01074	https://www.genome.jp/kegg-bin/show_pathway?ko05146/ko:C01074%09blue
ko00600	Sphingolipid metabolism	1	10	25	6095	0.04	0.0402976	1.39472	0.0960052	C12144	https://www.genome.jp/kegg-bin/show_pathway?ko00600/ko:C12144%09red
ko00073	Cutin, suberine and wax biosynthesis	1	10	27	6095	0.037037	0.0434573	1.36194	0.0960052	C19620	https://www.genome.jp/kegg-bin/show_pathway?ko00073/ko:C19620%09red
ko00750	Vitamin B6 metabolism	1	10	29	6095	0.0344828	0.0466078	1.33154	0.0960052	C00314	https://www.genome.jp/kegg-bin/show_pathway?ko00750/ko:C00314%09red
ko00010	Glycolysis / Gluconeogenesis	1	10	31	6095	0.0322581	0.0497488	1.30322	0.0960052	C00221	https://www.genome.jp/kegg-bin/show_pathway?ko00010/ko:C00221%09red
ko00030	Pentose phosphate pathway	1	10	35	6095	0.0285714	0.056003	1.25179	0.0960052	C00221	https://www.genome.jp/kegg-bin/show_pathway?ko00030/ko:C00221%09red
ko00340	Histidine metabolism	1	10	47	6095	0.0212766	0.074544	1.12759	0.105504	C05575	https://www.genome.jp/kegg-bin/show_pathway?ko00340/ko:C05575%09red
ko02060	Phosphotransferase system (PTS)	1	10	50	6095	0.02	0.0791277	1.10167	0.105504	C01697	https://www.genome.jp/kegg-bin/show_pathway?ko02060/ko:C01697%09blue
ko00590	Arachidonic acid metabolism	1	10	75	6095	0.0133333	0.116538	0.933532	0.139846	C14772	https://www.genome.jp/kegg-bin/show_pathway?ko00590/ko:C14772%09red
ko00541	O-Antigen nucleotide sugar biosynthesis	1	10	87	6095	0.0114943	0.134004	0.872881	0.146187	C00645	https://www.genome.jp/kegg-bin/show_pathway?ko00541/ko:C00645%09blue
ko00520	Amino sugar and nucleotide sugar metabolism	1	10	108	6095	0.00925926	0.163824	0.785622	0.163824	C00645	https://www.genome.jp/kegg-bin/show_pathway?ko00520/ko:C00645%09blue

## Sheet: BmK_Control
ID Annotation	Annotation	in set	set	in background	background	RichFactor	p-value	-lg(p-value)	FDR correction	Matching IDs	URL
ko00908	Zeatin biosynthesis	1	5	39	6095	0.025641	0.0315969	1.50036	0.0700576	C00147	https://www.genome.jp/kegg-bin/show_pathway?ko00908/ko:C00147%09red
ko00052	Galactose metabolism	1	5	46	6095	0.0217391	0.0371826	1.42966	0.0700576	C01697	https://www.genome.jp/kegg-bin/show_pathway?ko00052/ko:C01697%09blue
ko00340	Histidine metabolism	1	5	47	6095	0.0212766	0.0379784	1.42046	0.0700576	C05575	https://www.genome.jp/kegg-bin/show_pathway?ko00340/ko:C05575%09red
ko02060	Phosphotransferase system (PTS)	1	5	50	6095	0.02	0.0403628	1.39402	0.0700576	C01697	https://www.genome.jp/kegg-bin/show_pathway?ko02060/ko:C01697%09blue
ko00240	Pyrimidine metabolism	1	5	65	6095	0.0153846	0.0522139	1.28221	0.0700576	C00475	https://www.genome.jp/kegg-bin/show_pathway?ko00240/ko:C00475%09red
ko00590	Arachidonic acid metabolism	1	5	75	6095	0.0133333	0.0600494	1.22149	0.0700576	C14769	https://www.genome.jp/kegg-bin/show_pathway?ko00590/ko:C14769%09blue
ko00230	Purine metabolism	1	5	95	6095	0.0105263	0.0755649	1.12168	0.0755649	C00147	https://www.genome.jp/kegg-bin/show_pathway?ko00230/ko:C00147%09red

## Sheet: OF_Control
ID Annotation	Annotation	in set	set	in background	background	RichFactor	p-value	-lg(p-value)	FDR correction	Matching IDs	URL
ko02010	ABC transporters	4	29	93	6095	0.0430108	0.000900894	3.04533	0.0392075	C00025 C00208 C00243 C01630	https://www.genome.jp/kegg-bin/show_pathway?ko02010/ko:C00025%09blue/ko:C00208%09blue/ko:C00243%09blue/ko:C01630%09red
ko00052	Galactose metabolism	3	29	46	6095	0.0652174	0.00128151	2.89228	0.0392075	C00243 C01697 C05401	https://www.genome.jp/kegg-bin/show_pathway?ko00052/ko:C00243%09blue/ko:C01697%09blue/ko:C05401%09blue
ko02060	Phosphotransferase system (PTS)	3	29	50	6095	0.06	0.00163365	2.78684	0.0392075	C00208 C00243 C01697	https://www.genome.jp/kegg-bin/show_pathway?ko02060/ko:C00208%09blue/ko:C00243%09blue/ko:C01697%09blue
ko00600	Sphingolipid metabolism	2	29	25	6095	0.08	0.00612816	2.21267	0.0953185	C00319 C12144	https://www.genome.jp/kegg-bin/show_pathway?ko00600/ko:C00319%09blue/ko:C12144%09red
ko04973	Carbohydrate digestion and absorption	2	29	26	6095	0.0769231	0.00661934	2.17919	0.0953185	C00208 C00243	https://www.genome.jp/kegg-bin/show_pathway?ko04973/ko:C00208%09blue/ko:C00243%09blue
ko00230	Purine metabolism	3	29	95	6095	0.0315789	0.00999603	2.00017	0.119952	C00242 C00262 C00330	https://www.genome.jp/kegg-bin/show_pathway?ko00230/ko:C00242%09blue/ko:C00262%09blue/ko:C00330%09blue
ko04210	Apoptosis	1	29	4	6095	0.25	0.0189012	1.72351	0.130455	C00319	https://www.genome.jp/kegg-bin/show_pathway?ko04210/ko:C00319%09blue
ko00340	Histidine metabolism	2	29	47	6095	0.0425532	0.0207018	1.68399	0.130455	C00025 C01262	https://www.genome.jp/kegg-bin/show_pathway?ko00340/ko:C00025%09blue/ko:C01262%09red
ko04068	FoxO signaling pathway	1	29	5	6095	0.2	0.0235723	1.6276	0.130455	C00025	https://www.genome.jp/kegg-bin/show_pathway?ko04068/ko:C00025%09blue
ko05016	Huntington disease	1	29	6	6095	0.166667	0.028222	1.54941	0.130455	C00025	https://www.genome.jp/kegg-bin/show_pathway?ko05016/ko:C00025%09blue
ko02030	Bacterial chemotaxis	1	29	6	6095	0.166667	0.028222	1.54941	0.130455	C00208	https://www.genome.jp/kegg-bin/show_pathway?ko02030/ko:C00208%09blue
ko04720	Long-term potentiation	1	29	7	6095	0.142857	0.0328503	1.48346	0.130455	C00025	https://www.genome.jp/kegg-bin/show_pathway?ko04720/ko:C00025%09blue
ko05017	Spinocerebellar ataxia	1	29	7	6095	0.142857	0.0328503	1.48346	0.130455	C00025	https://www.genome.jp/kegg-bin/show_pathway?ko05017/ko:C00025%09blue
ko05033	Nicotine addiction	1	29	7	6095	0.142857	0.0328503	1.48346	0.130455	C00025	https://www.genome.jp/kegg-bin/show_pathway?ko05033/ko:C00025%09blue
ko04724	Glutamatergic synapse	1	29	8	6095	0.125	0.0374573	1.42646	0.130455	C00025	https://www.genome.jp/kegg-bin/show_pathway?ko04724/ko:C00025%09blue
ko05030	Cocaine addiction	1	29	8	6095	0.125	0.0374573	1.42646	0.130455	C00025	https://www.genome.jp/kegg-bin/show_pathway?ko05030/ko:C00025%09blue
ko00240	Pyrimidine metabolism	2	29	65	6095	0.0307692	0.0377953	1.42256	0.130455	C00380 C00881	https://www.genome.jp/kegg-bin/show_pathway?ko00240/ko:C00380%09blue/ko:C00881%09blue
ko04713	Circadian entrainment	1	29	9	6095	0.111111	0.0420431	1.37631	0.130455	C00025	https://www.genome.jp/kegg-bin/show_pathway?ko04713/ko:C00025%09blue
ko04727	GABAergic synapse	1	29	9	6095	0.111111	0.0420431	1.37631	0.130455	C00025	https://www.genome.jp/kegg-bin/show_pathway?ko04727/ko:C00025%09blue
ko04730	Long-term depression	1	29	9	6095	0.111111	0.0420431	1.37631	0.130455	C00025	https://www.genome.jp/kegg-bin/show_pathway?ko04730/ko:C00025%09blue
ko04217	Necroptosis	1	29	9	6095	0.111111	0.0420431	1.37631	0.130455	C00319	https://www.genome.jp/kegg-bin/show_pathway?ko04217/ko:C00319%09blue
ko04075	Plant hormone signal transduction	1	29	9	6095	0.111111	0.0420431	1.37631	0.130455	C00371	https://www.genome.jp/kegg-bin/show_pathway?ko04075/ko:C00371%09red
ko04745	Phototransduction - fly	1	29	9	6095	0.111111	0.0420431	1.37631	0.130455	C01530	https://www.genome.jp/kegg-bin/show_pathway?ko04745/ko:C01530%09red
ko05031	Amphetamine addiction	1	29	10	6095	0.1	0.0466078	1.33154	0.130455	C00025	https://www.genome.jp/kegg-bin/show_pathway?ko05031/ko:C00025%09blue
ko05034	Alcoholism	1	29	10	6095	0.1	0.0466078	1.33154	0.130455	C00025	https://www.genome.jp/kegg-bin/show_pathway?ko05034/ko:C00025%09blue
ko04072	Phospholipase D signaling pathway	1	29	11	6095	0.0909091	0.0511514	1.29114	0.130455	C00025	https://www.genome.jp/kegg-bin/show_pathway?ko04072/ko:C00025%09blue
ko04540	Gap junction	1	29	11	6095	0.0909091	0.0511514	1.29114	0.130455	C00025	https://www.genome.jp/kegg-bin/show_pathway?ko04540/ko:C00025%09blue
ko00472	D-Arginine and D-ornithine metabolism	1	29	11	6095	0.0909091	0.0511514	1.29114	0.130455	C03771	https://www.genome.jp/kegg-bin/show_pathway?ko00472/ko:C03771%09red
ko00330	Arginine and proline metabolism	2	29	78	6095	0.025641	0.0525445	1.27947	0.130455	C00025 C03771	https://www.genome.jp/kegg-bin/show_pathway?ko00330/ko:C00025%09blue/ko:C03771%09red
ko00471	D-Glutamine and D-glutamate metabolism	1	29	13	6095	0.0769231	0.0601762	1.22058	0.139764	C00025	https://www.genome.jp/kegg-bin/show_pathway?ko00471/ko:C00025%09blue
ko05146	Amoebiasis	1	29	13	6095	0.0769231	0.0601762	1.22058	0.139764	C01074	https://www.genome.jp/kegg-bin/show_pathway?ko05146/ko:C01074%09blue
ko05014	Amyotrophic lateral sclerosis	1	29	14	6095	0.0714286	0.0646574	1.18938	0.145479	C00025	https://www.genome.jp/kegg-bin/show_pathway?ko05014/ko:C00025%09blue
ko04071	Sphingolipid signaling pathway	1	29	15	6095	0.0666667	0.069118	1.16041	0.150803	C00319	https://www.genome.jp/kegg-bin/show_pathway?ko04071/ko:C00319%09blue
ko04964	Proximal tubule bicarbonate reclamation	1	29	17	6095	0.0588235	0.0779777	1.10803	0.165129	C00025	https://www.genome.jp/kegg-bin/show_pathway?ko04964/ko:C00025%09blue
ko00910	Nitrogen metabolism	1	29	19	6095	0.0526316	0.0867559	1.0617	0.173512	C00025	https://www.genome.jp/kegg-bin/show_pathway?ko00910/ko:C00025%09blue
ko04723	Retrograde endocannabinoid signaling	1	29	19	6095	0.0526316	0.0867559	1.0617	0.173512	C00025	https://www.genome.jp/kegg-bin/show_pathway?ko04723/ko:C00025%09blue
ko00430	Taurine and hypotaurine metabolism	1	29	22	6095	0.0454545	0.0997722	1.00099	0.194151	C00025	https://www.genome.jp/kegg-bin/show_pathway?ko00430/ko:C00025%09blue
ko00220	Arginine biosynthesis	1	29	23	6095	0.0434783	0.104071	0.98267	0.197187	C00025	https://www.genome.jp/kegg-bin/show_pathway?ko00220/ko:C00025%09blue
ko04742	Taste transduction	1	29	25	6095	0.04	0.112609	0.948426	0.202697	C00025	https://www.genome.jp/kegg-bin/show_pathway?ko04742/ko:C00025%09blue
ko04922	Glucagon signaling pathway	1	29	25	6095	0.04	0.112609	0.948426	0.202697	C00182	https://www.genome.jp/kegg-bin/show_pathway?ko04922/ko:C00182%09blue
ko04216	Ferroptosis	1	29	27	6095	0.037037	0.121069	0.916968	0.204986	C00025	https://www.genome.jp/kegg-bin/show_pathway?ko04216/ko:C00025%09blue
ko00073	Cutin, suberine and wax biosynthesis	1	29	27	6095	0.037037	0.121069	0.916968	0.204986	C19620	https://www.genome.jp/kegg-bin/show_pathway?ko00073/ko:C19620%09red
ko00250	Alanine, aspartate and glutamate metabolism	1	29	28	6095	0.0357143	0.125269	0.902155	0.204986	C00025	https://www.genome.jp/kegg-bin/show_pathway?ko00250/ko:C00025%09blue
ko05022	Pathways of neurodegeneration - multiple diseases	1	29	28	6095	0.0357143	0.125269	0.902155	0.204986	C00025	https://www.genome.jp/kegg-bin/show_pathway?ko05022/ko:C00025%09blue
ko04974	Protein digestion and absorption	1	29	29	6095	0.0344828	0.129451	0.887896	0.207121	C00025	https://www.genome.jp/kegg-bin/show_pathway?ko04974/ko:C00025%09blue
ko05230	Central carbon metabolism in cancer	1	29	30	6095	0.0333333	0.133612	0.874153	0.209132	C00025	https://www.genome.jp/kegg-bin/show_pathway?ko05230/ko:C00025%09blue
ko00332	Carbapenem biosynthesis	1	29	32	6095	0.03125	0.141879	0.848083	0.212818	C00025	https://www.genome.jp/kegg-bin/show_pathway?ko00332/ko:C00025%09blue
ko00410	beta-Alanine metabolism	1	29	32	6095	0.03125	0.141879	0.848083	0.212818	C01262	https://www.genome.jp/kegg-bin/show_pathway?ko00410/ko:C01262%09red
ko00660	C5-Branched dibasic acid metabolism	1	29	34	6095	0.0294118	0.150069	0.82371	0.220509	C00025	https://www.genome.jp/kegg-bin/show_pathway?ko00660/ko:C00025%09blue
ko00500	Starch and sucrose metabolism	1	29	37	6095	0.027027	0.162212	0.789916	0.230155	C00208	https://www.genome.jp/kegg-bin/show_pathway?ko00500/ko:C00208%09blue
ko00480	Glutathione metabolism	1	29	38	6095	0.0263158	0.166223	0.779309	0.230155	C00025	https://www.genome.jp/kegg-bin/show_pathway?ko00480/ko:C00025%09blue
ko00561	Glycerolipid metabolism	1	29	38	6095	0.0263158	0.166223	0.779309	0.230155	C05401	https://www.genome.jp/kegg-bin/show_pathway?ko00561/ko:C05401%09blue
ko00908	Zeatin biosynthesis	1	29	39	6095	0.025641	0.170215	0.769003	0.231235	C00371	https://www.genome.jp/kegg-bin/show_pathway?ko00908/ko:C00371%09red
ko04080	Neuroactive ligand-receptor interaction	1	29	40	6095	0.025	0.174188	0.758981	0.232251	C00025	https://www.genome.jp/kegg-bin/show_pathway?ko04080/ko:C00025%09blue
ko02020	Two-component system	1	29	41	6095	0.0243902	0.178144	0.74923	0.233206	C00025	https://www.genome.jp/kegg-bin/show_pathway?ko02020/ko:C00025%09blue
ko00650	Butanoate metabolism	1	29	42	6095	0.0238095	0.18208	0.739737	0.234103	C00025	https://www.genome.jp/kegg-bin/show_pathway?ko00650/ko:C00025%09blue
ko00592	alpha-Linolenic acid metabolism	1	29	44	6095	0.0227273	0.1899	0.721476	0.23648	C16328	https://www.genome.jp/kegg-bin/show_pathway?ko00592/ko:C16328%09blue
ko00900	Terpenoid backbone biosynthesis	1	29	45	6095	0.0222222	0.193782	0.712686	0.23648	C01107	https://www.genome.jp/kegg-bin/show_pathway?ko00900/ko:C01107%09blue
ko00460	Cyanoamino acid metabolism	1	29	45	6095	0.0222222	0.193782	0.712686	0.23648	C06114	https://www.genome.jp/kegg-bin/show_pathway?ko00460/ko:C06114%09red
ko00970	Aminoacyl-tRNA biosynthesis	1	29	52	6095	0.0192308	0.220461	0.656669	0.260216	C00025	https://www.genome.jp/kegg-bin/show_pathway?ko00970/ko:C00025%09blue
ko00983	Drug metabolism - other enzymes	1	29	52	6095	0.0192308	0.220461	0.656669	0.260216	C16634	https://www.genome.jp/kegg-bin/show_pathway?ko00983/ko:C16634%09red
ko00540	Lipopolysaccharide biosynthesis	1	29	54	6095	0.0185185	0.227925	0.642207	0.264688	C06397	https://www.genome.jp/kegg-bin/show_pathway?ko00540/ko:C06397%09blue
ko00997	Biosynthesis of various secondary metabolites - part 3	1	29	56	6095	0.0178571	0.235321	0.628339	0.264736	C00025	https://www.genome.jp/kegg-bin/show_pathway?ko00997/ko:C00025%09blue
ko00061	Fatty acid biosynthesis	1	29	56	6095	0.0178571	0.235321	0.628339	0.264736	C01530	https://www.genome.jp/kegg-bin/show_pathway?ko00061/ko:C01530%09red
ko00360	Phenylalanine metabolism	1	29	60	6095	0.0166667	0.249907	0.602221	0.276821	C02765	https://www.genome.jp/kegg-bin/show_pathway?ko00360/ko:C02765%09blue
ko00630	Glyoxylate and dicarboxylate metabolism	1	29	62	6095	0.016129	0.2571	0.589899	0.280472	C00025	https://www.genome.jp/kegg-bin/show_pathway?ko00630/ko:C00025%09blue
ko01040	Biosynthesis of unsaturated fatty acids	1	29	69	6095	0.0144928	0.281751	0.550134	0.302778	C01530	https://www.genome.jp/kegg-bin/show_pathway?ko01040/ko:C01530%09red
ko00590	Arachidonic acid metabolism	1	29	75	6095	0.0133333	0.302251	0.519632	0.320031	C14772	https://www.genome.jp/kegg-bin/show_pathway?ko00590/ko:C14772%09red
ko00524	Neomycin, kanamycin and gentamicin biosynthesis	1	29	81	6095	0.0123457	0.322186	0.491894	0.331391	C00025	https://www.genome.jp/kegg-bin/show_pathway?ko00524/ko:C00025%09blue
ko00998	Biosynthesis of various secondary metabolites - part 2	1	29	81	6095	0.0123457	0.322186	0.491894	0.331391	C06454	https://www.genome.jp/kegg-bin/show_pathway?ko00998/ko:C06454%09blue
ko00520	Amino sugar and nucleotide sugar metabolism	1	29	108	6095	0.00925926	0.405287	0.392237	0.410995	C02336	https://www.genome.jp/kegg-bin/show_pathway?ko00520/ko:C02336%09blue
ko00860	Porphyrin and chlorophyll metabolism	1	29	138	6095	0.00724638	0.486086	0.313287	0.486086	C00025	https://www.genome.jp/kegg-bin/show_pathway?ko00860/ko:C00025%09blue

## Sheet: OFBa_Control
ID Annotation	Annotation	in set	set	in background	background	RichFactor	p-value	-lg(p-value)	FDR correction	Matching IDs	URL
ko04973	Carbohydrate digestion and absorption	5	42	26	6095	0.192308	7.1877e-07	6.14341	6.2533e-05	C00089 C00208 C00243 C01355 C01835	https://www.genome.jp/kegg-bin/show_pathway?ko04973/ko:C00089%09blue/ko:C00208%09blue/ko:C00243%09blue/ko:C01355%09blue/ko:C01835%09blue
ko02010	ABC transporters	7	42	93	6095	0.0752688	2.67782e-06	5.57222	0.000116485	C00025 C00059 C00089 C00208 C00243 C00719 C01630	https://www.genome.jp/kegg-bin/show_pathway?ko02010/ko:C00025%09blue/ko:C00059%09red/ko:C00089%09blue/ko:C00208%09blue/ko:C00243%09blue/ko:C00719%09red/ko:C01630%09red
ko00230	Purine metabolism	6	42	95	6095	0.0631579	4.08113e-05	4.38922	0.00118353	C00059 C00242 C00262 C00294 C00330 C00387	https://www.genome.jp/kegg-bin/show_pathway?ko00230/ko:C00059%09red/ko:C00242%09blue/ko:C00262%09blue/ko:C00294%09blue/ko:C00330%09blue/ko:C00387%09blue
ko00052	Galactose metabolism	4	42	46	6095	0.0869565	0.00025778	3.58875	0.00560672	C00089 C00243 C00492 C01697	https://www.genome.jp/kegg-bin/show_pathway?ko00052/ko:C00089%09blue/ko:C00243%09blue/ko:C00492%09blue/ko:C01697%09blue
ko02060	Phosphotransferase system (PTS)	4	42	50	6095	0.08	0.000356617	3.4478	0.00620513	C00089 C00208 C00243 C01697	https://www.genome.jp/kegg-bin/show_pathway?ko02060/ko:C00089%09blue/ko:C00208%09blue/ko:C00243%09blue/ko:C01697%09blue
ko00240	Pyrimidine metabolism	4	42	65	6095	0.0615385	0.0009729	3.01193	0.0141071	C00214 C00299 C00380 C00881	https://www.genome.jp/kegg-bin/show_pathway?ko00240/ko:C00214%09blue/ko:C00299%09blue/ko:C00380%09blue/ko:C00881%09blue
ko04742	Taste transduction	2	42	25	6095	0.08	0.0125798	1.90033	0.136805	C00025 C00089	https://www.genome.jp/kegg-bin/show_pathway?ko04742/ko:C00025%09blue/ko:C00089%09blue
ko00600	Sphingolipid metabolism	2	42	25	6095	0.08	0.0125798	1.90033	0.136805	C00836 C12144	https://www.genome.jp/kegg-bin/show_pathway?ko00600/ko:C00836%09red/ko:C12144%09red
ko04974	Protein digestion and absorption	2	42	29	6095	0.0689655	0.0167317	1.77646	0.16174	C00025 C00483	https://www.genome.jp/kegg-bin/show_pathway?ko04974/ko:C00025%09blue/ko:C00483%09blue
ko00500	Starch and sucrose metabolism	2	42	37	6095	0.0540541	0.0265127	1.57655	0.210103	C00089 C00208	https://www.genome.jp/kegg-bin/show_pathway?ko00500/ko:C00089%09blue/ko:C00208%09blue
ko04080	Neuroactive ligand-receptor interaction	2	42	40	6095	0.05	0.0306514	1.51355	0.210103	C00025 C00483	https://www.genome.jp/kegg-bin/show_pathway?ko04080/ko:C00025%09blue/ko:C00483%09blue
ko04068	FoxO signaling pathway	1	42	5	6095	0.2	0.0339939	1.4686	0.210103	C00025	https://www.genome.jp/kegg-bin/show_pathway?ko04068/ko:C00025%09blue
ko05016	Huntington disease	1	42	6	6095	0.166667	0.040656	1.39088	0.210103	C00025	https://www.genome.jp/kegg-bin/show_pathway?ko05016/ko:C00025%09blue
ko02030	Bacterial chemotaxis	1	42	6	6095	0.166667	0.040656	1.39088	0.210103	C00208	https://www.genome.jp/kegg-bin/show_pathway?ko02030/ko:C00208%09blue
ko04720	Long-term potentiation	1	42	7	6095	0.142857	0.0472733	1.32538	0.210103	C00025	https://www.genome.jp/kegg-bin/show_pathway?ko04720/ko:C00025%09blue
ko05017	Spinocerebellar ataxia	1	42	7	6095	0.142857	0.0472733	1.32538	0.210103	C00025	https://www.genome.jp/kegg-bin/show_pathway?ko05017/ko:C00025%09blue
ko05033	Nicotine addiction	1	42	7	6095	0.142857	0.0472733	1.32538	0.210103	C00025	https://www.genome.jp/kegg-bin/show_pathway?ko05033/ko:C00025%09blue
ko00970	Aminoacyl-tRNA biosynthesis	2	42	52	6095	0.0384615	0.0494859	1.30552	0.210103	C00025 C00407	https://www.genome.jp/kegg-bin/show_pathway?ko00970/ko:C00025%09blue/ko:C00407%09blue
ko00051	Fructose and mannose metabolism	2	42	54	6095	0.037037	0.0529485	1.27615	0.210103	C00464 C01355	https://www.genome.jp/kegg-bin/show_pathway?ko00051/ko:C00464%09blue/ko:C01355%09blue
ko04724	Glutamatergic synapse	1	42	8	6095	0.125	0.0538459	1.26885	0.210103	C00025	https://www.genome.jp/kegg-bin/show_pathway?ko04724/ko:C00025%09blue
ko05030	Cocaine addiction	1	42	8	6095	0.125	0.0538459	1.26885	0.210103	C00025	https://www.genome.jp/kegg-bin/show_pathway?ko05030/ko:C00025%09blue
ko04713	Circadian entrainment	1	42	9	6095	0.111111	0.0603744	1.21915	0.210103	C00025	https://www.genome.jp/kegg-bin/show_pathway?ko04713/ko:C00025%09blue
ko04727	GABAergic synapse	1	42	9	6095	0.111111	0.0603744	1.21915	0.210103	C00025	https://www.genome.jp/kegg-bin/show_pathway?ko04727/ko:C00025%09blue
ko04730	Long-term depression	1	42	9	6095	0.111111	0.0603744	1.21915	0.210103	C00025	https://www.genome.jp/kegg-bin/show_pathway?ko04730/ko:C00025%09blue
ko04745	Phototransduction - fly	1	42	9	6095	0.111111	0.0603744	1.21915	0.210103	C01530	https://www.genome.jp/kegg-bin/show_pathway?ko04745/ko:C01530%09red
ko05031	Amphetamine addiction	1	42	10	6095	0.1	0.0668588	1.17484	0.212569	C00025	https://www.genome.jp/kegg-bin/show_pathway?ko05031/ko:C00025%09blue
ko05034	Alcoholism	1	42	10	6095	0.1	0.0668588	1.17484	0.212569	C00025	https://www.genome.jp/kegg-bin/show_pathway?ko05034/ko:C00025%09blue
ko04072	Phospholipase D signaling pathway	1	42	11	6095	0.0909091	0.0732995	1.1349	0.212569	C00025	https://www.genome.jp/kegg-bin/show_pathway?ko04072/ko:C00025%09blue
ko04540	Gap junction	1	42	11	6095	0.0909091	0.0732995	1.1349	0.212569	C00025	https://www.genome.jp/kegg-bin/show_pathway?ko04540/ko:C00025%09blue
ko05231	Choline metabolism in cancer	1	42	11	6095	0.0909091	0.0732995	1.1349	0.212569	C00670	https://www.genome.jp/kegg-bin/show_pathway?ko05231/ko:C00670%09red
ko01040	Biosynthesis of unsaturated fatty acids	2	42	69	6095	0.0289855	0.0814193	1.08927	0.226862	C01530 C06426	https://www.genome.jp/kegg-bin/show_pathway?ko01040/ko:C01530%09red/ko:C06426%09blue
ko00471	D-Glutamine and D-glutamate metabolism	1	42	13	6095	0.0769231	0.0860511	1.06524	0.226862	C00025	https://www.genome.jp/kegg-bin/show_pathway?ko00471/ko:C00025%09blue
ko05146	Amoebiasis	1	42	13	6095	0.0769231	0.0860511	1.06524	0.226862	C01074	https://www.genome.jp/kegg-bin/show_pathway?ko05146/ko:C01074%09blue
ko05014	Amyotrophic lateral sclerosis	1	42	14	6095	0.0714286	0.0923625	1.0345	0.226887	C00025	https://www.genome.jp/kegg-bin/show_pathway?ko05014/ko:C00025%09blue
ko05131	Shigellosis	1	42	14	6095	0.0714286	0.0923625	1.0345	0.226887	C00407	https://www.genome.jp/kegg-bin/show_pathway?ko05131/ko:C00407%09blue
ko00590	Arachidonic acid metabolism	2	42	75	6095	0.0266667	0.0938843	1.02741	0.226887	C00909 C14772	https://www.genome.jp/kegg-bin/show_pathway?ko00590/ko:C00909%09red/ko:C14772%09red
ko04071	Sphingolipid signaling pathway	1	42	15	6095	0.0666667	0.0986313	1.00599	0.231917	C00836	https://www.genome.jp/kegg-bin/show_pathway?ko04071/ko:C00836%09red
ko04964	Proximal tubule bicarbonate reclamation	1	42	17	6095	0.0588235	0.111042	0.954511	0.24771	C00025	https://www.genome.jp/kegg-bin/show_pathway?ko04964/ko:C00025%09blue
ko04726	Serotonergic synapse	1	42	17	6095	0.0588235	0.111042	0.954511	0.24771	C00909	https://www.genome.jp/kegg-bin/show_pathway?ko04726/ko:C00909%09red
ko00910	Nitrogen metabolism	1	42	19	6095	0.0526316	0.123287	0.909084	0.261608	C00025	https://www.genome.jp/kegg-bin/show_pathway?ko00910/ko:C00025%09blue
ko04723	Retrograde endocannabinoid signaling	1	42	19	6095	0.0526316	0.123287	0.909084	0.261608	C00025	https://www.genome.jp/kegg-bin/show_pathway?ko04723/ko:C00025%09blue
ko00430	Taurine and hypotaurine metabolism	1	42	22	6095	0.0454545	0.141345	0.84972	0.284748	C00025	https://www.genome.jp/kegg-bin/show_pathway?ko00430/ko:C00025%09blue
ko00220	Arginine biosynthesis	1	42	23	6095	0.0434783	0.147283	0.831847	0.284748	C00025	https://www.genome.jp/kegg-bin/show_pathway?ko00220/ko:C00025%09blue
ko04714	Thermogenesis	1	42	23	6095	0.0434783	0.147283	0.831847	0.284748	C00318	https://www.genome.jp/kegg-bin/show_pathway?ko04714/ko:C00318%09blue
ko00290	Valine, leucine and isoleucine biosynthesis	1	42	23	6095	0.0434783	0.147283	0.831847	0.284748	C00407	https://www.genome.jp/kegg-bin/show_pathway?ko00290/ko:C00407%09blue
ko04922	Glucagon signaling pathway	1	42	25	6095	0.04	0.15904	0.798494	0.294393	C00182	https://www.genome.jp/kegg-bin/show_pathway?ko04922/ko:C00182%09blue
ko00565	Ether lipid metabolism	1	42	25	6095	0.04	0.15904	0.798494	0.294393	C00670	https://www.genome.jp/kegg-bin/show_pathway?ko00565/ko:C00670%09red
ko04216	Ferroptosis	1	42	27	6095	0.037037	0.170638	0.767924	0.295095	C00025	https://www.genome.jp/kegg-bin/show_pathway?ko04216/ko:C00025%09blue
ko00073	Cutin, suberine and wax biosynthesis	1	42	27	6095	0.037037	0.170638	0.767924	0.295095	C19620	https://www.genome.jp/kegg-bin/show_pathway?ko00073/ko:C19620%09red
ko00250	Alanine, aspartate and glutamate metabolism	1	42	28	6095	0.0357143	0.176379	0.753554	0.295095	C00025	https://www.genome.jp/kegg-bin/show_pathway?ko00250/ko:C00025%09blue
ko05022	Pathways of neurodegeneration - multiple diseases	1	42	28	6095	0.0357143	0.176379	0.753554	0.295095	C00025	https://www.genome.jp/kegg-bin/show_pathway?ko05022/ko:C00025%09blue
ko00591	Linoleic acid metabolism	1	42	28	6095	0.0357143	0.176379	0.753554	0.295095	C06426	https://www.genome.jp/kegg-bin/show_pathway?ko00591/ko:C06426%09blue
ko05230	Central carbon metabolism in cancer	1	42	30	6095	0.0333333	0.187744	0.726435	0.308183	C00025	https://www.genome.jp/kegg-bin/show_pathway?ko05230/ko:C00025%09blue
ko00332	Carbapenem biosynthesis	1	42	32	6095	0.03125	0.198955	0.701245	0.320539	C00025	https://www.genome.jp/kegg-bin/show_pathway?ko00332/ko:C00025%09blue
ko00920	Sulfur metabolism	1	42	33	6095	0.030303	0.204504	0.689298	0.323489	C00059	https://www.genome.jp/kegg-bin/show_pathway?ko00920/ko:C00059%09red
ko00660	C5-Branched dibasic acid metabolism	1	42	34	6095	0.0294118	0.210016	0.677748	0.326275	C00025	https://www.genome.jp/kegg-bin/show_pathway?ko00660/ko:C00025%09blue
ko00030	Pentose phosphate pathway	1	42	35	6095	0.0285714	0.21549	0.666573	0.328906	C00198	https://www.genome.jp/kegg-bin/show_pathway?ko00030/ko:C00198%09blue
ko00480	Glutathione metabolism	1	42	38	6095	0.0263158	0.231692	0.63509	0.343631	C00025	https://www.genome.jp/kegg-bin/show_pathway?ko00480/ko:C00025%09blue
ko00261	Monobactam biosynthesis	1	42	39	6095	0.025641	0.237019	0.625217	0.343631	C00059	https://www.genome.jp/kegg-bin/show_pathway?ko00261/ko:C00059%09red
ko00908	Zeatin biosynthesis	1	42	39	6095	0.025641	0.237019	0.625217	0.343631	C02029	https://www.genome.jp/kegg-bin/show_pathway?ko00908/ko:C02029%09red
ko02020	Two-component system	1	42	41	6095	0.0243902	0.247566	0.606309	0.343631	C00025	https://www.genome.jp/kegg-bin/show_pathway?ko02020/ko:C00025%09blue
ko00280	Valine, leucine and isoleucine degradation	1	42	41	6095	0.0243902	0.247566	0.606309	0.343631	C00407	https://www.genome.jp/kegg-bin/show_pathway?ko00280/ko:C00407%09blue
ko00650	Butanoate metabolism	1	42	42	6095	0.0238095	0.252786	0.597247	0.343631	C00025	https://www.genome.jp/kegg-bin/show_pathway?ko00650/ko:C00025%09blue
ko02024	Quorum sensing	1	42	42	6095	0.0238095	0.252786	0.597247	0.343631	C00059	https://www.genome.jp/kegg-bin/show_pathway?ko02024/ko:C00059%09red
ko00592	alpha-Linolenic acid metabolism	1	42	44	6095	0.0227273	0.263121	0.579845	0.348305	C16328	https://www.genome.jp/kegg-bin/show_pathway?ko00592/ko:C16328%09blue
ko00460	Cyanoamino acid metabolism	1	42	45	6095	0.0222222	0.268235	0.571484	0.348305	C00407	https://www.genome.jp/kegg-bin/show_pathway?ko00460/ko:C00407%09blue
ko00900	Terpenoid backbone biosynthesis	1	42	45	6095	0.0222222	0.268235	0.571484	0.348305	C01107	https://www.genome.jp/kegg-bin/show_pathway?ko00900/ko:C01107%09blue
ko00340	Histidine metabolism	1	42	47	6095	0.0212766	0.278361	0.555392	0.356138	C00025	https://www.genome.jp/kegg-bin/show_pathway?ko00340/ko:C00025%09blue
ko00260	Glycine, serine and threonine metabolism	1	42	50	6095	0.02	0.293293	0.532698	0.364522	C00719	https://www.genome.jp/kegg-bin/show_pathway?ko00260/ko:C00719%09red
ko00053	Ascorbate and aldarate metabolism	1	42	50	6095	0.02	0.293293	0.532698	0.364522	C03033	https://www.genome.jp/kegg-bin/show_pathway?ko00053/ko:C03033%09blue
ko00564	Glycerophospholipid metabolism	1	42	52	6095	0.0192308	0.30308	0.518442	0.366222	C00670	https://www.genome.jp/kegg-bin/show_pathway?ko00564/ko:C00670%09red
ko00983	Drug metabolism - other enzymes	1	42	52	6095	0.0192308	0.30308	0.518442	0.366222	C16634	https://www.genome.jp/kegg-bin/show_pathway?ko00983/ko:C16634%09red
ko00540	Lipopolysaccharide biosynthesis	1	42	54	6095	0.0185185	0.312735	0.504824	0.368901	C06397	https://www.genome.jp/kegg-bin/show_pathway?ko00540/ko:C06397%09blue
ko00997	Biosynthesis of various secondary metabolites - part 3	1	42	56	6095	0.0178571	0.322259	0.491795	0.368901	C00025	https://www.genome.jp/kegg-bin/show_pathway?ko00997/ko:C00025%09blue
ko00061	Fatty acid biosynthesis	1	42	56	6095	0.0178571	0.322259	0.491795	0.368901	C01530	https://www.genome.jp/kegg-bin/show_pathway?ko00061/ko:C01530%09red
ko00040	Pentose and glucuronate interconversions	1	42	56	6095	0.0178571	0.322259	0.491795	0.368901	C03033	https://www.genome.jp/kegg-bin/show_pathway?ko00040/ko:C03033%09blue
ko00630	Glyoxylate and dicarboxylate metabolism	1	42	62	6095	0.016129	0.350064	0.455852	0.395503	C00025	https://www.genome.jp/kegg-bin/show_pathway?ko00630/ko:C00025%09blue
ko00270	Cysteine and methionine metabolism	1	42	63	6095	0.015873	0.354589	0.450275	0.395503	C00059	https://www.genome.jp/kegg-bin/show_pathway?ko00270/ko:C00059%09red
ko00960	Tropane, piperidine and pyridine alkaloid biosynthesis	1	42	68	6095	0.0147059	0.376755	0.423941	0.414907	C00407	https://www.genome.jp/kegg-bin/show_pathway?ko00960/ko:C00407%09blue
ko00966	Glucosinolate biosynthesis	1	42	77	6095	0.012987	0.414796	0.382165	0.444422	C00407	https://www.genome.jp/kegg-bin/show_pathway?ko00966/ko:C00407%09blue
ko00330	Arginine and proline metabolism	1	42	78	6095	0.0128205	0.41888	0.37791	0.444422	C00025	https://www.genome.jp/kegg-bin/show_pathway?ko00330/ko:C00025%09blue
ko00350	Tyrosine metabolism	1	42	78	6095	0.0128205	0.41888	0.37791	0.444422	C00483	https://www.genome.jp/kegg-bin/show_pathway?ko00350/ko:C00483%09blue
ko00524	Neomycin, kanamycin and gentamicin biosynthesis	1	42	81	6095	0.0123457	0.430966	0.365557	0.451736	C00025	https://www.genome.jp/kegg-bin/show_pathway?ko00524/ko:C00025%09blue
ko00680	Methane metabolism	1	42	84	6095	0.0119048	0.442807	0.353785	0.458622	C00483	https://www.genome.jp/kegg-bin/show_pathway?ko00680/ko:C00483%09blue
ko00520	Amino sugar and nucleotide sugar metabolism	1	42	108	6095	0.00925926	0.52926	0.276331	0.541713	C02336	https://www.genome.jp/kegg-bin/show_pathway?ko00520/ko:C02336%09blue
ko00950	Isoquinoline alkaloid biosynthesis	1	42	122	6095	0.00819672	0.573488	0.241475	0.580157	C00483	https://www.genome.jp/kegg-bin/show_pathway?ko00950/ko:C00483%09blue
ko00860	Porphyrin and chlorophyll metabolism	1	42	138	6095	0.00724638	0.619078	0.208254	0.619078	C00025	https://www.genome.jp/kegg-bin/show_pathway?ko00860/ko:C00025%09blue

## Sheet: OFBmK_Control
ID Annotation	Annotation	in set	set	in background	background	RichFactor	p-value	-lg(p-value)	FDR correction	Matching IDs	URL
ko00600	Sphingolipid metabolism	2	21	25	6095	0.08	0.00323399	2.49026	0.0477645	C00836 C12144	https://www.genome.jp/kegg-bin/show_pathway?ko00600/ko:C00836%09red/ko:C12144%09red
ko00230	Purine metabolism	3	21	95	6095	0.0315789	0.00398037	2.40008	0.0477645	C00242 C00262 C00330	https://www.genome.jp/kegg-bin/show_pathway?ko00230/ko:C00242%09blue/ko:C00262%09blue/ko:C00330%09blue
ko02060	Phosphotransferase system (PTS)	2	21	50	6095	0.04	0.0125392	1.90173	0.0990809	C00208 C01697	https://www.genome.jp/kegg-bin/show_pathway?ko02060/ko:C00208%09blue/ko:C01697%09blue
ko02030	Bacterial chemotaxis	1	21	6	6095	0.166667	0.0205038	1.68817	0.0990809	C00208	https://www.genome.jp/kegg-bin/show_pathway?ko02030/ko:C00208%09blue
ko00240	Pyrimidine metabolism	2	21	65	6095	0.0307692	0.0206419	1.68525	0.0990809	C00380 C00881	https://www.genome.jp/kegg-bin/show_pathway?ko00240/ko:C00380%09blue/ko:C00881%09blue
ko02010	ABC transporters	2	21	93	6095	0.0215054	0.0400778	1.3971	0.134669	C00208 C01630	https://www.genome.jp/kegg-bin/show_pathway?ko02010/ko:C00208%09blue/ko:C01630%09red
ko05146	Amoebiasis	1	21	13	6095	0.0769231	0.0439188	1.35735	0.134669	C01074	https://www.genome.jp/kegg-bin/show_pathway?ko05146/ko:C01074%09blue
ko05204	Chemical carcinogenesis	2	21	99	6095	0.020202	0.0448897	1.34785	0.134669	C16453 C19564	https://www.genome.jp/kegg-bin/show_pathway?ko05204/ko:C16453%09red/ko:C19564%09red
ko04071	Sphingolipid signaling pathway	1	21	15	6095	0.0666667	0.0505103	1.29662	0.134694	C00836	https://www.genome.jp/kegg-bin/show_pathway?ko04071/ko:C00836%09red
ko00980	Metabolism of xenobiotics by cytochrome P450	2	21	121	6095	0.0165289	0.0642228	1.19231	0.154135	C16453 C19564	https://www.genome.jp/kegg-bin/show_pathway?ko00980/ko:C16453%09red/ko:C19564%09red
ko04922	Glucagon signaling pathway	1	21	25	6095	0.04	0.0828237	1.08185	0.170421	C00182	https://www.genome.jp/kegg-bin/show_pathway?ko04922/ko:C00182%09blue
ko04973	Carbohydrate digestion and absorption	1	21	26	6095	0.0384615	0.0859968	1.06552	0.170421	C00208	https://www.genome.jp/kegg-bin/show_pathway?ko04973/ko:C00208%09blue
ko00591	Linoleic acid metabolism	1	21	28	6095	0.0357143	0.0923116	1.03474	0.170421	C06426	https://www.genome.jp/kegg-bin/show_pathway?ko00591/ko:C06426%09blue
ko00030	Pentose phosphate pathway	1	21	35	6095	0.0285714	0.114088	0.94276	0.181815	C00198	https://www.genome.jp/kegg-bin/show_pathway?ko00030/ko:C00198%09blue
ko00500	Starch and sucrose metabolism	1	21	37	6095	0.027027	0.120218	0.920031	0.181815	C00208	https://www.genome.jp/kegg-bin/show_pathway?ko00500/ko:C00208%09blue
ko00062	Fatty acid elongation	1	21	38	6095	0.0263158	0.123268	0.909151	0.181815	C05268	https://www.genome.jp/kegg-bin/show_pathway?ko00062/ko:C05268%09blue
ko00592	alpha-Linolenic acid metabolism	1	21	44	6095	0.0227273	0.141356	0.849686	0.181815	C16328	https://www.genome.jp/kegg-bin/show_pathway?ko00592/ko:C16328%09blue
ko00900	Terpenoid backbone biosynthesis	1	21	45	6095	0.0222222	0.144336	0.840626	0.181815	C01107	https://www.genome.jp/kegg-bin/show_pathway?ko00900/ko:C01107%09blue
ko00052	Galactose metabolism	1	21	46	6095	0.0217391	0.147306	0.83178	0.181815	C01697	https://www.genome.jp/kegg-bin/show_pathway?ko00052/ko:C01697%09blue
ko00310	Lysine degradation	1	21	50	6095	0.02	0.159088	0.798362	0.181815	C00431	https://www.genome.jp/kegg-bin/show_pathway?ko00310/ko:C00431%09blue
ko00071	Fatty acid degradation	1	21	50	6095	0.02	0.159088	0.798362	0.181815	C05268	https://www.genome.jp/kegg-bin/show_pathway?ko00071/ko:C05268%09blue
ko00540	Lipopolysaccharide biosynthesis	1	21	54	6095	0.0185185	0.170715	0.767727	0.186235	C06397	https://www.genome.jp/kegg-bin/show_pathway?ko00540/ko:C06397%09blue
ko01040	Biosynthesis of unsaturated fatty acids	1	21	69	6095	0.0144928	0.212969	0.671684	0.222228	C06426	https://www.genome.jp/kegg-bin/show_pathway?ko01040/ko:C06426%09blue
ko00330	Arginine and proline metabolism	1	21	78	6095	0.0128205	0.237328	0.624651	0.237328	C00431	https://www.genome.jp/kegg-bin/show_pathway?ko00330/ko:C00431%09blue
