# Supplementary material for: Bio-organic fertilizers improve Dendrocalamus farinosus growth by remolding the soil microbiome and metabolome
Source: Front Microbiol. 2023 Feb 15;14:1117355. doi: 10.3389/fmicb.2023.1117355 (PMC9975161; doi:10.3389/fmicb.2023.1117355)
Supplement: Supplementary file 5 [file Table_5.XLSX]

## Sheet: Table S6
Table S6. Fold changes in the differential metabolites with the top 10 VIP values in the soil
Treatment	Metabolites	Sub Class	VIP	Log2(FC)
OF VS Control	D-Maltose	Carbohydrates and carbohydrate conjugates	13.14	-0.76*
	5'-Butyrylphosphouridine	Unclassified	8.79	1.45*
	Diisobutyl phthalate	Benzoic acids and derivatives	8.25	0.10*
	C16 Sphinganine	Sphingoid bases	7.34	2.00*
	4-Methylene-L-glutamine	Unclassified	7.19	-0.81*
	({2-[2-(2-hydroxypropan-2-yl)-7-oxo-2H,3H,7H-furo[3,2-g]chromen-6-yl]-2-methylbut-3-en-1-yl}oxy)sulfonic acid	Furanocoumarins	6.98	-1.1**
	1,2-Diacylglycerol-LD-PI-pool	Unclassified	6.82	1.08*
	GW 4869	Unclassified	6.75	-0.36**
	Phytosphingosine	Amines	5.97	2.44*
	Galabiose	Carbohydrates and carbohydrate conjugates	4.94	-0.73*
Ba VS Control	4-Methylene-L-glutamine	Unclassified	15.02	-1.76**
	Trimethoprim	Anisoles	8.03	0.87*
	Galactitol	Carbohydrates and carbohydrate conjugates	6.89	-2.18**
	Galabiose	Carbohydrates and carbohydrate conjugates	5.62	-0.34*
	Beta-D-Glucose	Carbohydrates and carbohydrate conjugates	5.62	0.53*
	Hexylamine	Amines	5.43	-0.88*
	Diethyl(2S,3R)-2-methy-	Unclassified	5.19	0.89*
	3-hydroxysuccinate
	p-CHLOROPHENYLALANINE	Unclassified	5.07	-0.45*
	Phytosphingosine	Amines	4.76	1.22*
	L-Iditol	Carbohydrates and carbohydrate conjugates	4.28	-2.80**
BmK VS Control	Galactitol	Carbohydrates and carbohydrate conjugates	6.84	-1.07*
	L-Histidine trimethylbetaine	Amino acids, peptides, and analogues	3.75	1.69*
	5a,11a-Dehydrooxytetracycline	Unclassified	3.55	-0.31*
	Adenine	Purines and purine derivatives	3.42	1.50**
	1-O-(2-Acetamido-2-deoxy-alpha-D- 2-glucopyranosyl) -1D-myo- inositol 3-phosphate	Unclassified	2.96	-0.35*
	Cellohexaose	Unclassified	2.8	-0.19*
	Leucylproline	Amino acids, peptides, and analogues	1.71	0.37*
	2-Isopropyl-5-methylpyrazine	Pyrazines	1.64	1.82*
	Cytidine	Unclassified	1.6	0.83*
	S-Cysteinosuccinic acid	Amino acids, peptides, and analogues	1.5	1.41*
OFBa VS Control	D-Maltose	Carbohydrates and carbohydrate conjugates	13.92	-0.50**
	Diisobutyl phthalate	Benzoic acids and derivatives	13.76	0.18**
	Sucrose	Carbohydrates and carbohydrate conjugates	11.05	-0.21**
	Tropinone	Unclassified	9.16	0.10*
	Betaine	Amino acids, peptides, and analogues	8.75	1.30**
	Quinoline-3-carboxamides	Unclassified	8.35	-0.32*
	C16 Sphinganine	Sphingoid bases	8.13	1.70**
	GW 4869	Unclassified	7.18	-0.27**
	({2-[2-(2-hydroxypropan-2-yl)-7-oxo-2H,3H,7H-furo[3,2-g]chromen-6-yl]-2-methylbut-3-en-1-yl}oxy)sulfonic acid	Furanocoumarins	6.89	-0.60**
	Levan	Carbohydrates and carbohydrate conjugates	6.82	-0.46**
OFBmK VS Control	D-Maltose	Carbohydrates and carbohydrate conjugates	11.76	-0.52*
	C16 Sphinganine	Sphingoid bases	7.64	1.85*
	({2-[2-(2-hydroxypropan-2-yl)-7-oxo-2H,3H,7H-furo[3,2-g]chromen-6-yl]-2-methylbut-3-en-1-yl}oxy)sulfonic acid	Furanocoumarins	6	-0.62*
	Phytosphingosine	Amines	5.83	2.14*
	1,2-Diacylglycerol-LD-PI-pool	Unclassified	5.73	0.69*
	Galabiose	Carbohydrates and carbohydrate conjugates	5.45	-0.70*
	Galactitol	Carbohydrates and carbohydrate conjugates	4.15	-1.31*
	Citbismine C	Benzoquinolines	3.93	-0.92*
	5'-Deoxyadenosine	Unclassified	3.73	-1.89**
	Nitrilacarb	Unclassified	3.62	7.91**
BmK–OFBmK showed that the different fertilization treatments in the soil. BmK, Bacillus mucilaginosus Krassilnikov; Ba, Bacillus amyloliquefaciens; OF, organic fertilizer; OFBa, bio-organic fertilizer (containing Bacillus amyloliquefaciens); OFBmK, bio-organic fertilizer (containing Bacillus mucilaginosus Krassilnikov). Log2(FC) represents the ratio of relative content in the soil metabolite trea…
